# Supplementary material for: Gene Expression Programs of Mouse Endothelial Cells in Kidney Development and Disease
Source: PLoS One. 2010 Aug 10;5(8):e12034. doi: 10.1371/journal.pone.0012034 (PMC2919381; doi:10.1371/journal.pone.0012034)
Supplement: Supplementary Data S3 — Functional analysis of genes with elevated embryonic endothelia expression, compared to adult endothelia. ToppGene functional analysis of list of genes with elevated expression in embryonic endothelia vs adult endothelia, showing the overwhelming difference is related to cell division. (1.08 MB XLS) [file pone.0012034.s003.xls]

Category	ID	Name	Source	P-value	Hit Count in Query List	Hit Count in Genome	Hit in Query List
GO: Molecular Function	GO:0005524	ATP binding	 	0.000001	43	1488	"RFC3,KIF11,RHOBTB3,KIT,CHEK1,SLFN13,RFC4,PBK,RAD51,TRIP13,CENPE,TOP2A,MYO1B,TPX2,BUB1B,BUB1,WEE1,ERCC6L,KIF15,KIF23,MYH10,KIF4A,AURKA,PLK4,UCK2,HELLS,GSG2,MCM4,MCM6,KIF20B,SMC4,PLK1,CTPS,FIGNL1,TTK,SMC2,KTI12,ATAD5,UBE2C,NME4,MKI67,CDC2,MASTL"
GO: Molecular Function	GO:0043515	kinetochore binding	 	0.00001	3	4	"CENPE,CCDC99,CENPH"
GO: Biological Process	GO:0000279	M phase	 	0	67	408	"TACC3,KIF11,KPNA2,DLGAP5,CHEK1,PTTG1,MNS1,C14orf106,HAUS1,KNTC1,FBXO5,ANLN,MND1,ASPM,PBK,RAD51,NCAPH,SUV39H2,TRIP13,CENPE,CENPF,TIPIN,NDC80,NUP43,TPX2,BUB1B,BUB1,SGOL2,NUF2,SKA3,NCAPG2,CCDC99,WEE1,NCAPG,CKS2,INCENP,ERCC6L,KIF15,KIF23,MAD2L1,AURKA,NUSAP1,PRC1,SPC24,CCNB1,CCNA2,HELLS,BIRC5,IGF2,H2AFX,KIF20B,SMC4,PLK1,TTK,CENPH,SMC2,CEP55,CDCA8,CCNB2,DSCC1,CDC25C,UBE2C,SGOL1,CDC20,MKI67,CDC2,SPC25"
GO: Biological Process	GO:0022402	cell cycle process	 	0	76	664	"TACC3,KIF11,KPNA2,DLGAP5,CHEK1,PTTG1,MNS1,C14orf106,HAUS1,KNTC1,FBXO5,CDKN3,ANLN,DBF4,MND1,ASPM,PBK,RAD51,NCAPH,SUV39H2,BARD1,CENPA,TRIP13,CENPE,CENPF,TIPIN,NDC80,NUP43,TPX2,BUB1B,BUB1,SGOL2,NUF2,SKA3,NCAPG2,C11orf82,CCDC99,WEE1,NCAPG,CKS2,INCENP,ERCC6L,SASS6,KIF15,KIF23,MYH10,MAD2L1,AURKA,NUSAP1,PLK4,PRC1,SPC24,CCNB1,CCNA2,HELLS,BIRC5,IGF2,H2AFX,KIF20B,SMC4,PLK1,TTK,CENPH,SMC2,CEP55,PLAGL1,CDCA8,CCNB2,DSCC1,CDC25C,UBE2C,SGOL1,CDC20,MKI67,CDC2,SPC25"
GO: Biological Process	GO:0022403	cell cycle phase	 	0	69	513	"TACC3,KIF11,KPNA2,DLGAP5,CHEK1,PTTG1,MNS1,C14orf106,HAUS1,KNTC1,FBXO5,CDKN3,ANLN,DBF4,MND1,ASPM,PBK,RAD51,NCAPH,SUV39H2,TRIP13,CENPE,CENPF,TIPIN,NDC80,NUP43,TPX2,BUB1B,BUB1,SGOL2,NUF2,SKA3,NCAPG2,CCDC99,WEE1,NCAPG,CKS2,INCENP,ERCC6L,KIF15,KIF23,MAD2L1,AURKA,NUSAP1,PRC1,SPC24,CCNB1,CCNA2,HELLS,BIRC5,IGF2,H2AFX,KIF20B,SMC4,PLK1,TTK,CENPH,SMC2,CEP55,CDCA8,CCNB2,DSCC1,CDC25C,UBE2C,SGOL1,CDC20,MKI67,CDC2,SPC25"
GO: Biological Process	GO:0007049	cell cycle	 	0	88	1052	"TACC3,KIF11,KPNA2,DLGAP5,CHEK1,PTTG1,MNS1,C14orf106,HAUS1,KNTC1,FBXO5,CDKN3,ANLN,DBF4,MND1,ASPM,PBK,RAD51,NCAPH,SUV39H2,BARD1,CENPA,TRIP13,CENPE,CENPF,TIPIN,NDC80,E2F8,NUP43,ERH,TPX2,BUB1B,BUB1,GMNN,SGOL2,NUF2,SKA3,NCAPG2,C11orf82,CCDC99,WEE1,NCAPG,CKS1B,CKS2,INCENP,AIM2,ERCC6L,SASS6,KIF15,CHAF1A,KIF23,MYH10,MAD2L1,AURKA,NUSAP1,PLK4,PRC1,SPC24,NASP,CCNB1,CCNA2,HELLS,BIRC5,IGF2,GSG2,MCM6,H2AFX,CKAP2,KIF20B,SMC4,PLK1,TTK,CENPH,SMC2,CEP55,PLAGL1,CDCA8,CCNE2,CCNB2,DSCC1,CDC25C,UBE2C,SGOL1,CDC20,MRPL41,MKI67,CDC2,SPC25"
GO: Biological Process	GO:0000280	nuclear division	 	0	54	284	"KIF11,DLGAP5,PTTG1,C14orf106,HAUS1,KNTC1,FBXO5,ANLN,ASPM,PBK,NCAPH,CENPE,CENPF,TIPIN,NDC80,NUP43,TPX2,BUB1B,BUB1,NUF2,SKA3,NCAPG2,CCDC99,WEE1,NCAPG,INCENP,ERCC6L,KIF15,KIF23,MAD2L1,AURKA,NUSAP1,SPC24,CCNB1,CCNA2,HELLS,BIRC5,IGF2,KIF20B,SMC4,PLK1,TTK,CENPH,SMC2,CEP55,CDCA8,CCNB2,DSCC1,CDC25C,UBE2C,SGOL1,CDC20,CDC2,SPC25"
GO: Biological Process	GO:0007067	mitosis	 	0	54	284	"KIF11,DLGAP5,PTTG1,C14orf106,HAUS1,KNTC1,FBXO5,ANLN,ASPM,PBK,NCAPH,CENPE,CENPF,TIPIN,NDC80,NUP43,TPX2,BUB1B,BUB1,NUF2,SKA3,NCAPG2,CCDC99,WEE1,NCAPG,INCENP,ERCC6L,KIF15,KIF23,MAD2L1,AURKA,NUSAP1,SPC24,CCNB1,CCNA2,HELLS,BIRC5,IGF2,KIF20B,SMC4,PLK1,TTK,CENPH,SMC2,CEP55,CDCA8,CCNB2,DSCC1,CDC25C,UBE2C,SGOL1,CDC20,CDC2,SPC25"
GO: Biological Process	GO:0000087	M phase of mitotic cell cycle	 	0	54	288	"KIF11,DLGAP5,PTTG1,C14orf106,HAUS1,KNTC1,FBXO5,ANLN,ASPM,PBK,NCAPH,CENPE,CENPF,TIPIN,NDC80,NUP43,TPX2,BUB1B,BUB1,NUF2,SKA3,NCAPG2,CCDC99,WEE1,NCAPG,INCENP,ERCC6L,KIF15,KIF23,MAD2L1,AURKA,NUSAP1,SPC24,CCNB1,CCNA2,HELLS,BIRC5,IGF2,KIF20B,SMC4,PLK1,TTK,CENPH,SMC2,CEP55,CDCA8,CCNB2,DSCC1,CDC25C,UBE2C,SGOL1,CDC20,CDC2,SPC25"
GO: Biological Process	GO:0048285	organelle fission	 	0	54	291	"KIF11,DLGAP5,PTTG1,C14orf106,HAUS1,KNTC1,FBXO5,ANLN,ASPM,PBK,NCAPH,CENPE,CENPF,TIPIN,NDC80,NUP43,TPX2,BUB1B,BUB1,NUF2,SKA3,NCAPG2,CCDC99,WEE1,NCAPG,INCENP,ERCC6L,KIF15,KIF23,MAD2L1,AURKA,NUSAP1,SPC24,CCNB1,CCNA2,HELLS,BIRC5,IGF2,KIF20B,SMC4,PLK1,TTK,CENPH,SMC2,CEP55,CDCA8,CCNB2,DSCC1,CDC25C,UBE2C,SGOL1,CDC20,CDC2,SPC25"
GO: Biological Process	GO:0051301	cell division	 	0	57	341	"KIF11,KIT,PTTG1,C14orf106,HAUS1,KNTC1,FBXO5,ANLN,ASPM,NCAPH,CENPE,CENPF,TOP2A,TIPIN,NDC80,NUP43,BUB1B,BUB1,SGOL2,NUF2,SKA3,NCAPG2,CCDC99,WEE1,NCAPG,CKS1B,CKS2,INCENP,ERCC6L,KIF23,MYH10,MAD2L1,NUSAP1,PRC1,SPC24,CDCA7,CCNB1,CCNA2,HELLS,BIRC5,IGF2,KIF20B,SMC4,PLK1,CENPH,SMC2,CEP55,CDCA8,CCNE2,CCNB2,CDC25C,UBE2C,SGOL1,CDC20,CDC2,SPC25,NOTCH1"
GO: Biological Process	GO:0000278	mitotic cell cycle	 	0	60	502	"KIF11,KPNA2,DLGAP5,CHEK1,PTTG1,C14orf106,HAUS1,KNTC1,FBXO5,CDKN3,ANLN,DBF4,ASPM,PBK,NCAPH,CENPA,CENPE,CENPF,TIPIN,NDC80,NUP43,TPX2,BUB1B,BUB1,NUF2,SKA3,NCAPG2,CCDC99,WEE1,NCAPG,INCENP,ERCC6L,KIF15,KIF23,MAD2L1,AURKA,NUSAP1,PRC1,SPC24,CCNB1,CCNA2,HELLS,BIRC5,IGF2,KIF20B,SMC4,PLK1,TTK,CENPH,SMC2,CEP55,CDCA8,CCNB2,DSCC1,CDC25C,UBE2C,SGOL1,CDC20,CDC2,SPC25"
GO: Biological Process	GO:0007059	chromosome segregation	 	0	24	95	"DLGAP5,PTTG1,NCAPH,CENPE,CENPF,TOP2A,NDC80,NUP43,SGOL2,NUF2,SKA3,NCAPG2,CCDC99,NCAPG,INCENP,MAD2L1,NUSAP1,BIRC5,SMC4,CENPH,SMC2,DSCC1,SGOL1,SPC25"
GO: Biological Process	GO:0000226	microtubule cytoskeleton organization	 	0	23	172	"TACC3,KIF11,HAUS1,FBXO5,CENPA,CENPE,NDC80,TPX2,BUB1B,NUF2,SKA3,CCDC99,CKS2,SASS6,KIF23,AURKA,NUSAP1,PLK4,PRC1,BIRC5,TTK,UBE2C,SPC25"
GO: Biological Process	GO:0007051	spindle organization	 	0	14	48	"TACC3,KIF11,HAUS1,FBXO5,NDC80,TPX2,BUB1B,CKS2,KIF23,AURKA,PRC1,TTK,UBE2C,SPC25"
GO: Biological Process	GO:0007017	microtubule-based process	 	0	28	307	"TACC3,KIF11,KPNA2,HAUS1,FBXO5,CENPA,CENPE,CENPF,NDC80,TPX2,BUB1B,NUF2,SKA3,CCDC99,CKS2,SASS6,KIF15,KIF23,KIF4A,AURKA,NUSAP1,PLK4,PRC1,BIRC5,KIF20B,TTK,UBE2C,SPC25"
GO: Biological Process	GO:0051276	chromosome organization	 	0	35	553	"DLGAP5,PTTG1,NCAPH,SUV39H2,CENPA,CENPE,CENPF,TOP2A,NDC80,HMGB2,HMGN2,SGOL2,NCAPG2,HIST1H2BK,CCDC99,NCAPG,HIST1H2BH,HIST1H2BM,HIST1H2BL,HIST1H2BN,EZH2,CHAF1A,MAD2L1,HAT1,NUSAP1,NASP,HELLS,GSG2,H2AFX,SMC4,HIST1H2BJ,CENPH,SMC2,CDCA8,DSCC1"
GO: Biological Process	GO:0010564	regulation of cell cycle process	 	0	18	121	"DLGAP5,KNTC1,FBXO5,ANLN,DBF4,CENPE,CENPF,TIPIN,BUB1,MAD2L1,NUSAP1,PLK4,BIRC5,IGF2,KIF20B,TTK,CDC25C,UBE2C"
GO: Biological Process	GO:0051726	regulation of cell cycle	 	0	31	450	"TACC3,DLGAP5,CHEK1,KNTC1,FBXO5,CDKN3,ANLN,DBF4,CENPE,CENPF,TIPIN,BUB1B,BUB1,GMNN,CKS1B,CKS2,AIM2,MAD2L1,NUSAP1,PLK4,CCNB1,CCNA2,BIRC5,IGF2,H2AFX,KIF20B,TTK,CCNE2,CDC25C,UBE2C,CDC2"
GO: Biological Process	GO:0000070	mitotic sister chromatid segregation	 	0	12	42	"DLGAP5,NCAPH,CENPE,NDC80,NCAPG2,CCDC99,NCAPG,MAD2L1,NUSAP1,SMC4,SMC2,DSCC1"
GO: Biological Process	GO:0000819	sister chromatid segregation	 	0	12	43	"DLGAP5,NCAPH,CENPE,NDC80,NCAPG2,CCDC99,NCAPG,MAD2L1,NUSAP1,SMC4,SMC2,DSCC1"
GO: Biological Process	GO:0051783	regulation of nuclear division	 	0	14	73	"DLGAP5,KNTC1,ANLN,CENPE,CENPF,BUB1,MAD2L1,NUSAP1,BIRC5,IGF2,KIF20B,TTK,CDC25C,UBE2C"
GO: Biological Process	GO:0007088	regulation of mitosis	 	0	14	73	"DLGAP5,KNTC1,ANLN,CENPE,CENPF,BUB1,MAD2L1,NUSAP1,BIRC5,IGF2,KIF20B,TTK,CDC25C,UBE2C"
GO: Biological Process	GO:0007346	regulation of mitotic cell cycle	 	0	19	171	"DLGAP5,KNTC1,FBXO5,ANLN,DBF4,CENPE,CENPF,BUB1B,BUB1,MAD2L1,NUSAP1,CCNA2,BIRC5,IGF2,KIF20B,TTK,CDC25C,UBE2C,CDC2"
GO: Biological Process	GO:0006323	DNA packaging	 	0	19	171	"NCAPH,CENPA,TOP2A,HMGB2,NCAPG2,HIST1H2BK,NCAPG,HIST1H2BH,HIST1H2BM,HIST1H2BL,HIST1H2BN,CHAF1A,HAT1,NUSAP1,HELLS,H2AFX,SMC4,HIST1H2BJ,SMC2"
GO: Biological Process	GO:0006260	DNA replication	 	0	22	254	"RFC3,CHEK1,FEN1,RFC4,GINS1,DBF4,RAD51,CENPF,TOP2A,TIPIN,HMGB2,GMNN,PRIM1,CHAF1A,NASP,ORC6L,MCM4,MCM6,CCNE2,DSCC1,RRM2,CDC25C"
GO: Biological Process	GO:0000075	cell cycle checkpoint	 	0	14	92	"CHEK1,KNTC1,CENPE,CENPF,TIPIN,BUB1B,BUB1,MAD2L1,CCNA2,BIRC5,H2AFX,TTK,CCNE2,CDC2"
GO: Biological Process	GO:0007010	cytoskeleton organization	 	0	34	694	"TACC3,KIF11,KPNA2,HAUS1,FBXO5,ANLN,ELMO1,CENPA,CENPE,CENPF,NDC80,TPX2,BUB1B,NUF2,SKA3,CCDC99,CKS2,SASS6,KIF15,KIF23,MYH10,KIF4A,AURKA,PPP1R9A,NUSAP1,PLK4,PRC1,S100A9,BIRC5,KIF20B,TTK,TMSB10,UBE2C,SPC25"
GO: Biological Process	GO:0006259	DNA metabolic process	 	0	30	577	"GEN1,RFC3,KPNA2,CHEK1,PTTG1,FEN1,RFC4,GINS1,DBF4,MND1,RAD51,BARD1,TRIP13,CENPF,TOP2A,TIPIN,HMGB2,GMNN,PRIM1,CHAF1A,NASP,ORC6L,HELLS,MCM4,MCM6,H2AFX,CCNE2,DSCC1,RRM2,CDC25C"
GO: Biological Process	GO:0007126	meiosis	 	0	14	120	"CHEK1,PTTG1,MNS1,FBXO5,MND1,RAD51,SUV39H2,TRIP13,SGOL2,CKS2,H2AFX,PLK1,SGOL1,MKI67"
GO: Biological Process	GO:0051327	M phase of meiotic cell cycle	 	0	14	120	"CHEK1,PTTG1,MNS1,FBXO5,MND1,RAD51,SUV39H2,TRIP13,SGOL2,CKS2,H2AFX,PLK1,SGOL1,MKI67"
GO: Biological Process	GO:0051321	meiotic cell cycle	 	0	14	122	"CHEK1,PTTG1,MNS1,FBXO5,MND1,RAD51,SUV39H2,TRIP13,SGOL2,CKS2,H2AFX,PLK1,SGOL1,MKI67"
GO: Biological Process	GO:0031577	spindle checkpoint	 	0	6	13	"CENPE,CENPF,BUB1,MAD2L1,BIRC5,TTK"
GO: Biological Process	GO:0033043	regulation of organelle organization	 	0	18	264	"TACC3,DLGAP5,KNTC1,ANLN,CENPE,CENPF,BUB1,SKA3,MAD2L1,NUSAP1,PLK4,BIRC5,IGF2,KIF20B,TTK,TMSB10,CDC25C,UBE2C"
GO: Biological Process	GO:0030261	chromosome condensation	 	0	7	25	"NCAPH,TOP2A,NCAPG2,NCAPG,NUSAP1,SMC4,SMC2"
GO: Biological Process	GO:0007091	mitotic metaphase/anaphase transition	 	0	7	26	"DLGAP5,CENPE,CENPF,BUB1B,BUB1,MAD2L1,TTK"
GO: Biological Process	GO:0007093	mitotic cell cycle checkpoint	 	0	9	56	"KNTC1,CENPE,CENPF,BUB1B,BUB1,MAD2L1,CCNA2,TTK,CDC2"
GO: Biological Process	GO:0007052	mitotic spindle organization	 	0	6	17	"KIF11,NDC80,KIF23,PRC1,TTK,SPC25"
GO: Biological Process	GO:0007076	mitotic chromosome condensation	 	0	6	18	"NCAPH,NCAPG2,NCAPG,NUSAP1,SMC4,SMC2"
GO: Biological Process	GO:0051640	organelle localization	 	0	11	102	"TACC3,DLGAP5,ASPM,CENPA,CENPE,CENPF,NDC80,CCDC99,MYH10,NUSAP1,BIRC5"
GO: Biological Process	GO:0007094	mitotic cell cycle spindle assembly checkpoint	 	0	5	12	"CENPE,CENPF,BUB1,MAD2L1,TTK"
GO: Biological Process	GO:0045841	negative regulation of mitotic metaphase/anaphase transition	 	0	5	12	"CENPE,CENPF,BUB1,MAD2L1,TTK"
GO: Biological Process	GO:0030071	regulation of mitotic metaphase/anaphase transition	 	0.000001	6	23	"DLGAP5,CENPE,CENPF,BUB1,MAD2L1,TTK"
GO: Biological Process	GO:0031497	chromatin assembly	 	0.000001	12	140	"CENPA,HMGB2,HIST1H2BK,HIST1H2BH,HIST1H2BM,HIST1H2BL,HIST1H2BN,CHAF1A,HAT1,HELLS,H2AFX,HIST1H2BJ"
GO: Biological Process	GO:0006261	DNA-dependent DNA replication	 	0.000001	10	92	"RFC3,FEN1,RFC4,RAD51,TIPIN,HMGB2,PRIM1,MCM4,MCM6,CCNE2"
GO: Biological Process	GO:0051784	negative regulation of nuclear division	 	0.000001	5	14	"CENPE,CENPF,BUB1,MAD2L1,TTK"
GO: Biological Process	GO:0045839	negative regulation of mitosis	 	0.000001	5	14	"CENPE,CENPF,BUB1,MAD2L1,TTK"
GO: Biological Process	GO:0051656	establishment of organelle localization	 	0.000001	9	75	"DLGAP5,CENPA,CENPE,CENPF,NDC80,CCDC99,MYH10,NUSAP1,BIRC5"
GO: Biological Process	GO:0000089	mitotic metaphase	 	0.000001	4	7	"FBXO5,CENPE,NDC80,CDCA8"
GO: Biological Process	GO:0050000	chromosome localization	 	0.000001	5	15	"DLGAP5,CENPE,CENPF,CCDC99,BIRC5"
GO: Biological Process	GO:0051303	establishment of chromosome localization	 	0.000001	5	15	"DLGAP5,CENPE,CENPF,CCDC99,BIRC5"
GO: Biological Process	GO:0006333	chromatin assembly or disassembly	 	0.000001	13	180	"SUV39H2,CENPA,HMGB2,HIST1H2BK,HIST1H2BH,HIST1H2BM,HIST1H2BL,HIST1H2BN,CHAF1A,HAT1,HELLS,H2AFX,HIST1H2BJ"
GO: Biological Process	GO:0034728	nucleosome organization	 	0.000001	11	127	"CENPA,HMGB2,HIST1H2BK,HIST1H2BH,HIST1H2BM,HIST1H2BL,HIST1H2BN,CHAF1A,NASP,H2AFX,HIST1H2BJ"
GO: Biological Process	GO:0040001	establishment of mitotic spindle localization	 	0.000002	4	8	"CENPA,NDC80,CCDC99,NUSAP1"
GO: Biological Process	GO:0051313	attachment of spindle microtubules to chromosome	 	0.000003	3	3	"CENPE,NDC80,NUF2"
GO: Biological Process	GO:0045840	positive regulation of mitosis	 	0.000003	6	30	"DLGAP5,CENPE,NUSAP1,BIRC5,IGF2,UBE2C"
GO: Biological Process	GO:0051785	positive regulation of nuclear division	 	0.000003	6	30	"DLGAP5,CENPE,NUSAP1,BIRC5,IGF2,UBE2C"
GO: Biological Process	GO:0000910	cytokinesis	 	0.000004	7	48	"ANLN,INCENP,MYH10,NUSAP1,PRC1,BIRC5,PLK1"
GO: Biological Process	GO:0051439	regulation of ubiquitin-protein ligase activity during mitotic cell cycle	 	0.000004	8	68	"FBXO5,BUB1B,MAD2L1,CCNB1,PLK1,UBE2C,CDC20,CDC2"
GO: Biological Process	GO:0006334	nucleosome assembly	 	0.000005	10	117	"CENPA,HMGB2,HIST1H2BK,HIST1H2BH,HIST1H2BM,HIST1H2BL,HIST1H2BN,CHAF1A,H2AFX,HIST1H2BJ"
GO: Biological Process	GO:0051653	spindle localization	 	0.000007	4	10	"CENPA,NDC80,CCDC99,NUSAP1"
GO: Biological Process	GO:0051323	metaphase	 	0.000007	4	10	"FBXO5,CENPE,NDC80,CDCA8"
GO: Biological Process	GO:0051293	establishment of spindle localization	 	0.000007	4	10	"CENPA,NDC80,CCDC99,NUSAP1"
GO: Biological Process	GO:0065004	protein-DNA complex assembly	 	0.000008	13	211	"CENPA,CENPE,CENPF,HMGB2,HIST1H2BK,HIST1H2BH,HIST1H2BM,HIST1H2BL,HIST1H2BN,CHAF1A,HELLS,H2AFX,HIST1H2BJ"
GO: Biological Process	GO:0051438	regulation of ubiquitin-protein ligase activity	 	0.000009	8	75	"FBXO5,BUB1B,MAD2L1,CCNB1,PLK1,UBE2C,CDC20,CDC2"
GO: Biological Process	GO:0008283	cell proliferation	 	0.00001	36	1215	"TACC3,H19,KIT,DLGAP5,CHEK1,GPC3,CDKN3,MARCKSL1,GINS1,ASPM,CENPF,TIPIN,E2F8,TPX2,BUB1B,BUB1,ITGA2,NCAPG2,CKS1B,CKS2,IMPDH2,KIF15,EGLN3,MYH10,NASP,CDCA7,CCNA2,NDN,HELLS,IGF2,PLK1,TTK,SOX11,CDC25C,MKI67,NOTCH1"
GO: Biological Process	GO:0051383	kinetochore organization	 	0.00001	3	4	"CENPE,CENPF,CENPH"
GO: Biological Process	GO:0051340	regulation of ligase activity	 	0.000012	8	78	"FBXO5,BUB1B,MAD2L1,CCNB1,PLK1,UBE2C,CDC20,CDC2"
GO: Biological Process	GO:0007096	regulation of exit from mitosis	 	0.000016	4	12	"KNTC1,ANLN,BIRC5,UBE2C"
GO: Biological Process	GO:0048015	phosphoinositide-mediated signaling	 	0.000017	10	134	"FEN1,RFC4,TOP2A,NDC80,HMGB2,GAP43,BUB1B,CKS2,AURKA,UBE2C"
GO: Biological Process	GO:0045787	positive regulation of cell cycle	 	0.000025	7	63	"DLGAP5,CENPE,CENPF,NUSAP1,BIRC5,IGF2,UBE2C"
GO: Biological Process	GO:0008608	attachment of spindle microtubules to kinetochore	 	0.000025	3	5	"CENPE,NDC80,NUF2"
GO: Biological Process	GO:0006271	DNA strand elongation during DNA replication	 	0.000025	3	5	"RFC3,FEN1,RFC4"
GO: Biological Process	GO:0010948	negative regulation of cell cycle process	 	0.00003	5	27	"CENPE,CENPF,BUB1,MAD2L1,TTK"
GO: Biological Process	GO:0006268	DNA unwinding during replication	 	0.000032	4	14	"RAD51,HMGB2,MCM4,MCM6"
GO: Biological Process	GO:0034984	cellular response to DNA damage stimulus	 	0.000034	16	354	"GEN1,RFC3,CHEK1,PTTG1,FEN1,RFC4,RAD51,BARD1,TRIP13,TOP2A,TIPIN,HMGB2,CHAF1A,CCNA2,H2AFX,CDC2"
GO: Biological Process	GO:0006974	response to DNA damage stimulus	 	0.000034	17	394	"GEN1,RFC3,CHEK1,PTTG1,FEN1,RFC4,RAD51,BARD1,TRIP13,TOP2A,TIPIN,HMGB2,CHAF1A,CCNA2,H2AFX,ATAD5,CDC2"
GO: Biological Process	GO:0010458	exit from mitosis	 	0.000043	4	15	"KNTC1,ANLN,BIRC5,UBE2C"
GO: Biological Process	GO:0034508	centromere complex assembly	 	0.00005	3	6	"CENPE,CENPF,HELLS"
GO: Biological Process	GO:0000132	establishment of mitotic spindle orientation	 	0.00005	3	6	"CENPA,NDC80,CCDC99"
GO: Biological Process	GO:0045039	protein import into mitochondrial inner membrane	 	0.00005	3	6	"TIMM8A,TIMM13,TIMM10"
GO: Biological Process	GO:0051294	establishment of spindle orientation	 	0.00005	3	6	"CENPA,NDC80,CCDC99"
GO: Biological Process	GO:0007127	meiosis I	 	0.000069	6	51	"CHEK1,PTTG1,FBXO5,RAD51,TRIP13,CKS2"
GO: Biological Process	GO:0051325	interphase	 	0.00008	9	130	"KPNA2,CHEK1,CDKN3,DBF4,CENPF,TIPIN,CCNB1,BIRC5,CDC25C"
GO: Biological Process	GO:0022616	DNA strand elongation	 	0.000087	3	7	"RFC3,FEN1,RFC4"
GO: Biological Process	GO:0034453	microtubule anchoring	 	0.000087	3	7	"CENPE,NDC80,NUF2"
GO: Biological Process	GO:0032392	DNA geometric change	 	0.000093	4	18	"RAD51,HMGB2,MCM4,MCM6"
GO: Biological Process	GO:0032508	DNA duplex unwinding	 	0.000093	4	18	"RAD51,HMGB2,MCM4,MCM6"
GO: Biological Process	GO:0000079	regulation of cyclin-dependent protein kinase activity	 	0.000096	6	54	"CHEK1,CDKN3,CKS1B,CKS2,CCNE2,CDC25C"
GO: Biological Process	GO:0051128	regulation of cellular component organization	 	0.000098	25	792	"TACC3,KIT,DLGAP5,GPC3,KNTC1,ANLN,CENPE,CENPF,BUB1,ROBO1,ITGA2,SKA3,MYH10,MAD2L1,NUSAP1,PLK4,S100A9,NDN,BIRC5,IGF2,KIF20B,TTK,TMSB10,CDC25C,UBE2C"
GO: Biological Process	GO:0006325	chromatin organization	 	0.000104	17	431	"SUV39H2,CENPA,HMGB2,HMGN2,HIST1H2BK,HIST1H2BH,HIST1H2BM,HIST1H2BL,HIST1H2BN,EZH2,CHAF1A,HAT1,NASP,HELLS,GSG2,H2AFX,HIST1H2BJ"
GO: Biological Process	GO:0051130	positive regulation of cellular component organization	 	0.000107	11	200	"KIT,DLGAP5,GPC3,CENPE,ROBO1,ITGA2,NUSAP1,PLK4,BIRC5,IGF2,UBE2C"
GO: Biological Process	GO:0048103	somatic stem cell division	 	0.000138	3	8	"KIT,ASPM,NOTCH1"
GO: Biological Process	GO:0000022	mitotic spindle elongation	 	0.00019	2	2	"KIF23,PRC1"
GO: Biological Process	GO:0051231	spindle elongation	 	0.00019	2	2	"KIF23,PRC1"
GO: Biological Process	GO:0007079	mitotic chromosome movement towards spindle pole	 	0.00019	2	2	"DLGAP5,CENPE"
GO: Biological Process	GO:0033205	cytokinesis during cell cycle	 	0.000205	3	9	"MYH10,NUSAP1,PLK1"
GO: Biological Process	GO:0007007	inner mitochondrial membrane organization	 	0.000205	3	9	"TIMM8A,TIMM13,TIMM10"
GO: Biological Process	GO:0031145	anaphase-promoting complex-dependent proteasomal ubiquitin-dependent protein catabolic process	 	0.000209	6	62	"BUB1B,MAD2L1,CCNB1,UBE2C,CDC20,CDC2"
GO: Biological Process	GO:0010638	positive regulation of organelle organization	 	0.00023	7	89	"DLGAP5,CENPE,NUSAP1,PLK4,BIRC5,IGF2,UBE2C"
GO: Biological Process	GO:0006281	DNA repair	 	0.000255	13	297	"GEN1,RFC3,CHEK1,PTTG1,FEN1,RFC4,RAD51,BARD1,TRIP13,TOP2A,HMGB2,CHAF1A,H2AFX"
GO: Biological Process	GO:0051437	positive regulation of ubiquitin-protein ligase activity during mitotic cell cycle	 	0.000271	6	65	"FBXO5,CCNB1,PLK1,UBE2C,CDC20,CDC2"
GO: Biological Process	GO:0006266	DNA ligation	 	0.00029	3	10	"RAD51,TOP2A,HMGB2"
GO: Biological Process	GO:0051443	positive regulation of ubiquitin-protein ligase activity	 	0.00032	6	67	"FBXO5,CCNB1,PLK1,UBE2C,CDC20,CDC2"
GO: Biological Process	GO:0051329	interphase of mitotic cell cycle	 	0.000324	8	124	"KPNA2,CHEK1,CDKN3,DBF4,CENPF,CCNB1,BIRC5,CDC25C"
GO: Biological Process	GO:0000086	G2/M transition of mitotic cell cycle	 	0.000356	4	25	"CHEK1,CENPF,CCNB1,BIRC5"
GO: Biological Process	GO:0045132	meiotic chromosome segregation	 	0.000395	3	11	"PTTG1,SGOL2,SGOL1"
GO: Biological Process	GO:0051310	metaphase plate congression	 	0.000395	3	11	"CENPE,CENPF,CCDC99"
GO: Biological Process	GO:0051351	positive regulation of ligase activity	 	0.000406	6	70	"FBXO5,CCNB1,PLK1,UBE2C,CDC20,CDC2"
GO: Biological Process	GO:0006270	DNA replication initiation	 	0.000417	4	26	"TIPIN,MCM4,MCM6,CCNE2"
GO: Biological Process	GO:0000077	DNA damage checkpoint	 	0.000459	5	47	"CHEK1,TIPIN,CCNA2,H2AFX,CDC2"
GO: Biological Process	GO:0017145	stem cell division	 	0.000521	3	12	"KIT,ASPM,NOTCH1"
GO: Biological Process	GO:0032886	regulation of microtubule-based process	 	0.000558	5	49	"TACC3,CENPE,CENPF,SKA3,PLK4"
GO: Biological Process	GO:0022607	cellular component assembly	 	0.000558	30	1151	"KIT,HAUS1,KNTC1,PPIH,FBXO5,ANLN,RAD51,CENPA,CENPE,CENPF,HMGB2,TPX2,CASC5,HIST1H2BK,HIST1H2BH,GEMIN6,MPP6,HIST1H2BM,HIST1H2BL,HIST1H2BN,GCHFR,CHAF1A,MYH10,HAT1,PRND,HELLS,H2AFX,HIST1H2BJ,TMSB10,RRM2"
GO: Biological Process	GO:0051305	chromosome movement towards spindle pole	 	0.000565	2	3	"DLGAP5,CENPE"
GO: Biological Process	GO:0051382	kinetochore assembly	 	0.000565	2	3	"CENPE,CENPF"
GO: Biological Process	GO:0045842	positive regulation of mitotic metaphase/anaphase transition	 	0.000565	2	3	"DLGAP5,CENPE"
GO: Biological Process	GO:0044085	cellular component biogenesis	 	0.000627	32	1268	"KIT,HAUS1,KNTC1,MRTO4,PPIH,FBXO5,ANLN,RAD51,CENPA,CENPE,CENPF,HMGB2,TPX2,CASC5,HIST1H2BK,HIST1H2BH,GEMIN6,MPP6,HIST1H2BM,HIST1H2BL,HIST1H2BN,GCHFR,CHAF1A,MYH10,HAT1,PRND,NHP2,HELLS,H2AFX,HIST1H2BJ,TMSB10,RRM2"
GO: Biological Process	GO:0043933	macromolecular complex subunit organization	 	0.0007	26	954	"KNTC1,PPIH,FBXO5,ANLN,RAD51,CENPA,CENPE,CENPF,HMGB2,HIST1H2BK,HIST1H2BH,GEMIN6,MPP6,HIST1H2BM,HIST1H2BL,HIST1H2BN,GCHFR,CHAF1A,PRND,NASP,HELLS,H2AFX,HIST1H2BJ,CENPH,TMSB10,RRM2"
GO: Biological Process	GO:0031570	DNA integrity checkpoint	 	0.000736	5	52	"CHEK1,TIPIN,CCNA2,H2AFX,CDC2"
GO: Biological Process	GO:0051651	maintenance of location in cell	 	0.000803	5	53	"TACC3,ASPM,CENPE,NDC80,NUF2"
GO: Biological Process	GO:0001556	oocyte maturation	 	0.000845	3	14	"FBXO5,TRIP13,CCNB1"
GO: Biological Process	GO:0045185	maintenance of protein location	 	0.001034	5	56	"TACC3,CENPE,NDC80,NUF2,TMSB10"
GO: Biological Process	GO:0007144	female meiosis I	 	0.001119	2	4	"FBXO5,TRIP13"
GO: Biological Process	GO:0031536	positive regulation of exit from mitosis	 	0.001119	2	4	"BIRC5,UBE2C"
GO: Biological Process	GO:0000281	cytokinesis after mitosis	 	0.001119	2	4	"MYH10,NUSAP1"
GO: Biological Process	GO:0065003	macromolecular complex assembly	 	0.001121	24	880	"KNTC1,PPIH,FBXO5,ANLN,RAD51,CENPA,CENPE,CENPF,HMGB2,HIST1H2BK,HIST1H2BH,GEMIN6,MPP6,HIST1H2BM,HIST1H2BL,HIST1H2BN,GCHFR,CHAF1A,PRND,HELLS,H2AFX,HIST1H2BJ,TMSB10,RRM2"
GO: Biological Process	GO:0009220	pyrimidine ribonucleotide biosynthetic process	 	0.001274	3	16	"UMPS,CTPS,NME4"
GO: Biological Process	GO:0007143	female meiosis	 	0.001274	3	16	"FBXO5,TRIP13,PLK1"
GO: Biological Process	GO:0009218	pyrimidine ribonucleotide metabolic process	 	0.001532	3	17	"UMPS,CTPS,NME4"
GO: Biological Process	GO:0006220	pyrimidine nucleotide metabolic process	 	0.001635	4	37	"DCTD,UMPS,CTPS,NME4"
GO: Biological Process	GO:0051436	negative regulation of ubiquitin-protein ligase activity during mitotic cell cycle	 	0.001638	5	62	"FBXO5,BUB1B,MAD2L1,UBE2C,CDC20"
GO: Biological Process	GO:0043681	protein import into mitochondrion	 	0.001819	3	18	"TIMM8A,TIMM13,TIMM10"
GO: Biological Process	GO:0051225	spindle assembly	 	0.001819	3	18	"HAUS1,FBXO5,TPX2"
GO: Biological Process	GO:0007095	mitotic cell cycle G2/M transition DNA damage checkpoint	 	0.001848	2	5	"CCNA2,CDC2"
GO: Biological Process	GO:0051444	negative regulation of ubiquitin-protein ligase activity	 	0.001888	5	64	"FBXO5,BUB1B,MAD2L1,UBE2C,CDC20"
GO: Biological Process	GO:0051352	negative regulation of ligase activity	 	0.001888	5	64	"FBXO5,BUB1B,MAD2L1,UBE2C,CDC20"
GO: Biological Process	GO:0051297	centrosome organization	 	0.001993	4	39	"KIF11,HAUS1,SASS6,PLK4"
GO: Biological Process	GO:0031023	microtubule organizing center organization	 	0.002627	4	42	"KIF11,HAUS1,SASS6,PLK4"
GO: Biological Process	GO:0010639	negative regulation of organelle organization	 	0.003045	6	103	"CENPE,CENPF,BUB1,MAD2L1,TTK,TMSB10"
GO: Biological Process	GO:0032507	maintenance of protein location in cell	 	0.003386	4	45	"TACC3,CENPE,NDC80,NUF2"
GO: Biological Process	GO:0034622	cellular macromolecular complex assembly	 	0.003386	17	589	"FBXO5,ANLN,CENPA,CENPE,CENPF,HMGB2,HIST1H2BK,HIST1H2BH,GEMIN6,HIST1H2BM,HIST1H2BL,HIST1H2BN,CHAF1A,HELLS,H2AFX,HIST1H2BJ,TMSB10"
GO: Biological Process	GO:0034621	cellular macromolecular complex subunit organization	 	0.003403	18	640	"FBXO5,ANLN,CENPA,CENPE,CENPF,HMGB2,HIST1H2BK,HIST1H2BH,GEMIN6,HIST1H2BM,HIST1H2BL,HIST1H2BN,CHAF1A,HELLS,H2AFX,HIST1H2BJ,CENPH,TMSB10"
GO: Biological Process	GO:0001701	in utero embryonic development	 	0.003453	10	261	"GINS1,NCAPG2,MYH10,PLK4,NASP,HBA2,CCNB1,RSPO3,CCNB2,NOTCH1"
GO: Biological Process	GO:0051235	maintenance of location	 	0.003512	6	106	"TACC3,ASPM,CENPE,NDC80,NUF2,TMSB10"
GO: Biological Process	GO:0006221	pyrimidine nucleotide biosynthetic process	 	0.003753	3	23	"UMPS,CTPS,NME4"
GO: Biological Process	GO:0048599	oocyte development	 	0.003753	3	23	"FBXO5,TRIP13,CCNB1"
GO: Biological Process	GO:0000085	G2 phase of mitotic cell cycle	 	0.00381	2	7	"KPNA2,CENPF"
GO: Biological Process	GO:0007089	traversing start control point of mitotic cell cycle	 	0.00381	2	7	"DBF4,CDC25C"
GO: Biological Process	GO:0051319	G2 phase	 	0.00381	2	7	"KPNA2,CENPF"
GO: Biological Process	GO:0010926	anatomical structure formation	 	0.003987	33	1481	"KIT,HAUS1,KNTC1,PPIH,FBXO5,ANLN,RAD51,CENPA,CENPE,CENPF,HMGB2,TPX2,ROBO1,CASC5,HIST1H2BK,HIST1H2BH,GEMIN6,MPP6,HIST1H2BM,HIST1H2BL,HIST1H2BN,GCHFR,CHAF1A,MYH10,HAT1,PF4,PRND,HELLS,H2AFX,HIST1H2BJ,TMSB10,RRM2,NOTCH1"
GO: Biological Process	GO:0009994	oocyte differentiation	 	0.004246	3	24	"FBXO5,TRIP13,CCNB1"
GO: Biological Process	GO:0043161	proteasomal ubiquitin-dependent protein catabolic process	 	0.004405	6	111	"BUB1B,MAD2L1,CCNB1,UBE2C,CDC20,CDC2"
GO: Biological Process	GO:0010498	proteasomal protein catabolic process	 	0.004405	6	111	"BUB1B,MAD2L1,CCNB1,UBE2C,CDC20,CDC2"
GO: Biological Process	GO:0045786	negative regulation of cell cycle	 	0.004794	8	189	"CENPE,CENPF,BUB1B,BUB1,GMNN,AIM2,MAD2L1,TTK"
GO: Cellular Component	GO:0005694	chromosome	 	0	55	515	"RFC3,CHEK1,C14orf106,KNTC1,CENPK,RFC4,RAD51,NCAPH,SUV39H2,CENPA,CENPE,CENPF,TOP2A,TIPIN,NDC80,NUP43,HMGB2,HMGB3,BUB1B,HMGN2,BUB1,SGOL2,XIST,CASC5,NUF2,SKA3,HIST1H2BK,CCDC99,NCAPG,PRIM1,HIST1H2BH,HIST1H2BM,INCENP,HIST1H2BL,HIST1H2BN,ERCC6L,APITD1,MAD2L1,C6orf173,HMGN5,SPC24,ORC6L,HELLS,BIRC5,H2AFX,SMC4,HIST1H2BJ,CENPH,SMC2,CENPQ,CDCA8,DSCC1,SGOL1,MKI67,SPC25"
GO: Cellular Component	GO:0044427	chromosomal part	 	0	51	443	"RFC3,CHEK1,C14orf106,KNTC1,CENPK,RFC4,RAD51,NCAPH,SUV39H2,CENPA,CENPE,CENPF,TIPIN,NDC80,NUP43,BUB1B,HMGN2,BUB1,SGOL2,CASC5,NUF2,SKA3,HIST1H2BK,CCDC99,NCAPG,PRIM1,HIST1H2BH,HIST1H2BM,INCENP,HIST1H2BL,HIST1H2BN,ERCC6L,APITD1,MAD2L1,C6orf173,HMGN5,SPC24,ORC6L,HELLS,BIRC5,H2AFX,SMC4,HIST1H2BJ,CENPH,SMC2,CENPQ,CDCA8,DSCC1,SGOL1,MKI67,SPC25"
GO: Cellular Component	GO:0000775	"chromosome, centromeric region"	 	0	31	131	"C14orf106,KNTC1,CENPK,SUV39H2,CENPA,CENPE,CENPF,NDC80,NUP43,BUB1B,BUB1,SGOL2,CASC5,NUF2,SKA3,CCDC99,INCENP,ERCC6L,APITD1,MAD2L1,C6orf173,SPC24,HELLS,BIRC5,CENPH,CENPQ,CDCA8,DSCC1,SGOL1,MKI67,SPC25"
GO: Cellular Component	GO:0000793	condensed chromosome	 	0	30	136	"CHEK1,KNTC1,CENPK,RAD51,NCAPH,CENPA,CENPE,CENPF,TOP2A,NDC80,NUP43,HMGB2,BUB1B,BUB1,SGOL2,CASC5,NUF2,SKA3,CCDC99,NCAPG,INCENP,ERCC6L,MAD2L1,SPC24,SMC4,CENPH,SMC2,SGOL1,MKI67,SPC25"
GO: Cellular Component	GO:0005819	spindle	 	0	30	149	"KIF11,DLGAP5,HAUS1,KNTC1,FBXO5,ASPM,CENPE,CENPF,TPX2,BUB1B,BUB1,SKA3,CCDC99,INCENP,KIF15,KIF23,MYH10,KIF4A,MAD2L1,AURKA,NUSAP1,PRC1,BIRC5,CKAP2,KIF20B,PLK1,TTK,CDCA8,CDC20,CDC2"
GO: Cellular Component	GO:0000779	"condensed chromosome, centromeric region"	 	0	20	66	"KNTC1,CENPK,CENPA,CENPE,CENPF,NDC80,NUP43,BUB1B,BUB1,SGOL2,CASC5,NUF2,SKA3,CCDC99,ERCC6L,MAD2L1,SPC24,CENPH,SGOL1,SPC25"
GO: Cellular Component	GO:0000777	condensed chromosome kinetochore	 	0	18	58	"KNTC1,CENPK,CENPA,CENPE,CENPF,NDC80,NUP43,BUB1B,BUB1,CASC5,NUF2,SKA3,CCDC99,ERCC6L,MAD2L1,SPC24,CENPH,SPC25"
GO: Cellular Component	GO:0000776	kinetochore	 	0	18	79	"KNTC1,CENPK,CENPA,CENPE,CENPF,NDC80,NUP43,BUB1B,BUB1,CASC5,NUF2,SKA3,CCDC99,ERCC6L,MAD2L1,SPC24,CENPH,SPC25"
GO: Cellular Component	GO:0015630	microtubule cytoskeleton	 	0	39	589	"TACC3,KIF11,DLGAP5,CHEK1,HAUS1,KNTC1,FBXO5,ASPM,CENPE,CENPF,TOP2A,TPX2,BUB1B,BUB1,SKA3,CCDC99,INCENP,SASS6,KIF15,KIF23,MYH10,KIF4A,MAD2L1,AURKA,NUSAP1,PLK4,PRC1,CCNB1,NDN,BIRC5,CKAP2,KIF20B,PLK1,TTK,CEP55,CDCA8,CCNB2,CDC20,CDC2"
GO: Cellular Component	GO:0044430	cytoskeletal part	 	0	44	1003	"TACC3,KIF11,DLGAP5,CHEK1,MNS1,HAUS1,KNTC1,FBXO5,ANLN,ASPM,CENPE,CENPF,TOP2A,MYO1B,TPX2,BUB1B,BUB1,SKA3,CCDC99,INCENP,SASS6,KIF15,KIF23,MYH10,KIF4A,MAD2L1,AURKA,PPP1R9A,NUSAP1,PLK4,PRC1,LMNB1,CCNB1,NDN,BIRC5,CKAP2,KIF20B,PLK1,TTK,CEP55,CDCA8,CDC20,CDC2,TPM2"
GO: Cellular Component	GO:0000922	spindle pole	 	0	10	34	"KIF11,DLGAP5,KNTC1,ASPM,CENPF,TPX2,BUB1,CCDC99,MAD2L1,PLK1"
GO: Cellular Component	GO:0005876	spindle microtubule	 	0	9	31	"KIF11,KNTC1,TPX2,SKA3,KIF4A,NUSAP1,PRC1,BIRC5,CDC2"
GO: Cellular Component	GO:0005815	microtubule organizing center	 	0	20	283	"TACC3,DLGAP5,CHEK1,HAUS1,CENPF,TOP2A,BUB1B,BUB1,CCDC99,SASS6,KIF15,MAD2L1,AURKA,PLK4,CCNB1,NDN,BIRC5,KIF20B,PLK1,CEP55"
GO: Cellular Component	GO:0005856	cytoskeleton	 	0	49	1476	"TACC3,KIF11,DLGAP5,CHEK1,MNS1,HAUS1,KNTC1,FBXO5,ANLN,ASPM,ELMO1,NCAPH,CENPE,CENPF,TOP2A,MYO1B,TPX2,BUB1B,BUB1,SKA3,CCDC99,INCENP,KLHL4,SASS6,KIF15,KIF23,MYH10,KIF4A,MAD2L1,AURKA,PPP1R9A,NUSAP1,PLK4,PRC1,LMNB1,CCNB1,NDN,BIRC5,CKAP2,KIF20B,PLK1,TTK,TMSB10,CEP55,CDCA8,CCNB2,CDC20,CDC2,TPM2"
GO: Cellular Component	GO:0005654	nucleoplasm	 	0	37	981	"RFC3,KIF11,KPNA2,CHEK1,RFC4,PPIH,FBXO5,DBF4,RAD51,TOP2A,E2F8,HMGB2,GMNN,WEE1,PRIM1,CKS1B,GEMIN6,EZH2,CHAF1A,KIF23,HMGN5,CCNB1,NHP2,CCNA2,WDHD1,ORC6L,MCM4,MCM6,H2AFX,KIF20B,PLK1,CCNE2,DSCC1,CDC25C,UBE2C,CDC20,CDC2"
GO: Cellular Component	GO:0005813	centrosome	 	0	18	253	"TACC3,DLGAP5,CHEK1,HAUS1,CENPF,TOP2A,BUB1B,CCDC99,SASS6,KIF15,AURKA,PLK4,CCNB1,NDN,BIRC5,KIF20B,PLK1,CEP55"
GO: Cellular Component	GO:0000228	nuclear chromosome	 	0	15	182	"CHEK1,RAD51,SUV39H2,TOP2A,TIPIN,HMGB2,BUB1,SGOL2,PRIM1,INCENP,ORC6L,BIRC5,H2AFX,SMC2,SGOL1"
GO: Cellular Component	GO:0031262	Ndc80 complex	 	0	4	4	"NDC80,NUF2,SPC24,SPC25"
GO: Cellular Component	GO:0000940	outer kinetochore of condensed chromosome	 	0	5	9	"CENPE,CENPF,BUB1B,SKA3,CCDC99"
GO: Cellular Component	GO:0030496	midbody	 	0	6	20	"CENPF,INCENP,KIF23,MYH10,BIRC5,CDC2"
GO: Cellular Component	GO:0000785	chromatin	 	0	16	246	"SUV39H2,CENPA,CENPF,TIPIN,HMGN2,HIST1H2BK,HIST1H2BH,HIST1H2BM,INCENP,HIST1H2BL,HIST1H2BN,HMGN5,HELLS,H2AFX,HIST1H2BJ,DSCC1"
GO: Cellular Component	GO:0000796	condensin complex	 	0	4	6	"NCAPH,NCAPG,SMC4,SMC2"
GO: Cellular Component	GO:0005874	microtubule	 	0.000001	16	281	"KIF11,HAUS1,KNTC1,CENPE,TPX2,SKA3,INCENP,KIF15,KIF23,KIF4A,NUSAP1,PRC1,BIRC5,CKAP2,KIF20B,CDC2"
GO: Cellular Component	GO:0044454	nuclear chromosome part	 	0.000022	10	144	"RAD51,SUV39H2,TIPIN,BUB1,SGOL2,PRIM1,INCENP,ORC6L,H2AFX,SGOL1"
GO: Cellular Component	GO:0032993	protein-DNA complex	 	0.000038	9	123	"CENPA,HIST1H2BK,PRIM1,HIST1H2BH,HIST1H2BM,HIST1H2BL,HIST1H2BN,H2AFX,HIST1H2BJ"
GO: Cellular Component	GO:0042719	mitochondrial intermembrane space protein transporter complex	 	0.000045	3	6	"TIMM8A,TIMM13,TIMM10"
GO: Cellular Component	GO:0000786	nucleosome	 	0.000051	8	99	"CENPA,HIST1H2BK,HIST1H2BH,HIST1H2BM,HIST1H2BL,HIST1H2BN,H2AFX,HIST1H2BJ"
GO: Cellular Component	GO:0005814	centriole	 	0.000059	5	32	"TOP2A,SASS6,PLK4,BIRC5,CEP55"
GO: Cellular Component	GO:0005875	microtubule associated complex	 	0.00007	9	133	"KIF11,HAUS1,CENPE,KIF15,KIF23,KIF4A,BIRC5,KIF20B,CDCA8"
GO: Cellular Component	GO:0000794	condensed nuclear chromosome	 	0.000077	6	54	"CHEK1,RAD51,BUB1,SGOL2,INCENP,SGOL1"
GO: Cellular Component	GO:0000780	"condensed nuclear chromosome, centromeric region"	 	0.000077	3	7	"BUB1,SGOL2,SGOL1"
GO: Cellular Component	GO:0005657	replication fork	 	0.000105	5	36	"RFC3,CHEK1,RFC4,PRIM1,H2AFX"
GO: Cellular Component	GO:0030892	mitotic cohesin complex	 	0.000175	2	2	"SGOL2,SGOL1"
GO: Cellular Component	GO:0005730	nucleolus	 	0.000214	25	866	"KIT,C14orf106,MRTO4,MRC1,TOP2A,ERH,HMGB2,TPX2,RPL12,TOX4,HMGN5,NUSAP1,PLK4,S100A9,NHP2,WDHD1,NOL3,IGF2BP1,BIRC5,MCM4,KIF20B,SOX11,CDCA8,MKI67,RPP30"
GO: Cellular Component	GO:0030529	ribonucleoprotein complex	 	0.000262	18	531	"H19,MRTO4,PPIH,RPL12,SNORA69,MEX3A,GEMIN6,LSM5,HBA2,NHP2,IGF2BP1,MRPL47,RPS12,RPSA,RPL22L1,MRPL41,MRPL36,RPP30"
GO: Cellular Component	GO:0032133	chromosome passenger complex	 	0.00052	2	3	"BIRC5,CDCA8"
GO: Cellular Component	GO:0044450	microtubule organizing center part	 	0.000793	5	55	"TOP2A,SASS6,PLK4,BIRC5,CEP55"
GO: Cellular Component	GO:0005816	spindle pole body	 	0.001031	2	4	"BUB1,MAD2L1"
GO: Cellular Component	GO:0005758	mitochondrial intermembrane space	 	0.001407	4	37	"TIMM8A,TIMM13,TIMM10,NME4"
GO: Cellular Component	GO:0045120	pronucleus	 	0.001617	3	18	"CENPF,EZH2,CCNA2"
GO: Cellular Component	GO:0005871	kinesin complex	 	0.001617	3	18	"KIF11,KIF15,KIF23"
GO: Cellular Component	GO:0005840	ribosome	 	0.001986	9	210	"MRTO4,RPL12,HBA2,MRPL47,RPS12,RPSA,RPL22L1,MRPL41,MRPL36"
GO: Cellular Component	GO:0051233	spindle midzone	 	0.002532	2	6	"BUB1B,PLK1"
GO: Cellular Component	GO:0005663	DNA replication factor C complex	 	0.002532	2	6	"RFC3,RFC4"
GO: Cellular Component	GO:0031970	organelle envelope lumen	 	0.003168	4	46	"TIMM8A,TIMM13,TIMM10,NME4"
GO: Cellular Component	GO:0005829	cytosol	 	0.003996	31	1420	"DCTD,PTTG1,PPA1,FBXO5,ELMO1,BUB1B,RPL12,GEMIN6,IMPDH2,GCHFR,MAD2L1,PLK4,UMPS,UCK2,HBA2,CCNB1,HBE1,NOL3,BIRC5,PLK1,CTPS,RPS12,RPSA,CCNE2,CCNB2,RRM2,CDC25C,UBE2C,CDC20,NUTF2,CDC2"
GO: Cellular Component	GO:0005721	centromeric heterochromatin	 	0.004644	2	8	"INCENP,HELLS"
GO: Cellular Component	GO:0008278	cohesin complex	 	0.004644	2	8	"SGOL2,SGOL1"
GO: Cellular Component	GO:0000792	heterochromatin	 	0.006435	4	56	"SUV39H2,INCENP,HELLS,H2AFX"
GO: Cellular Component	GO:0032153	cell division site	 	0.008887	2	11	"ANLN,MYH10"
GO: Cellular Component	GO:0032155	cell division site part	 	0.008887	2	11	"ANLN,MYH10"
GO: Cellular Component	GO:0005744	mitochondrial inner membrane presequence translocase complex	 	0.010571	2	12	"TIMM13,TIMM10"
GO: Cellular Component	GO:0005833	hemoglobin complex	 	0.010571	2	12	"HBA2,HBE1"
Mouse Phenotype	MP:0006204	embryonic lethality before implantation	 	0	19	119	"KIF11,KIT,CHEK1,PTTG1,FEN1,FBXO5,RAD51,BUB1,GMNN,IMPDH2,CHAF1A,AURKA,NASP,BIRC5,PLK1,CDCA8,RPSA,CDC20,CDC2"
Mouse Phenotype	MP:0004046	abnormal mitosis	 	0	14	60	"TACC3,PTTG1,FBXO5,CENPA,CENPE,BUB1B,BUB1,GMNN,MAD2L1,AURKA,BIRC5,PLK1,CDCA8,CDC20"
Mouse Phenotype	MP:0003111	abnormal nucleus morphology	 	0	15	89	"CHEK1,PTTG1,CENPA,BUB1,GMNN,CHAF1A,MAD2L1,AURKA,LMNB1,HELLS,BIRC5,MCM4,PLK1,CDCA8,CDC20"
Mouse Phenotype	MP:0001672	abnormal embryogenesis/ development	 	0	47	1217	"TACC3,KIF11,H19,KIT,DLGAP5,CHEK1,PTTG1,GPC3,FEN1,MRC1,FBXO5,MARCKSL1,GINS1,RAD51,SUV39H2,BARD1,CENPA,CENPE,E2F8,BUB1B,GMNN,XIST,NCAPG2,INCENP,EZH2,TFRC,CHAF1A,MAD2L1,AURKA,PLK4,PEG10,LMNB1,NASP,CCNA2,HELLS,BIRC5,IGF2,MCM4,TYROBP,PLK1,SOX11,MEST,CDCA8,RSPO3,CCNE2,CDC20,NOTCH1"
Mouse Phenotype	MP:0005380	embryogenesis phenotype	 	0	47	1217	"TACC3,KIF11,H19,KIT,DLGAP5,CHEK1,PTTG1,GPC3,FEN1,MRC1,FBXO5,MARCKSL1,GINS1,RAD51,SUV39H2,BARD1,CENPA,CENPE,E2F8,BUB1B,GMNN,XIST,NCAPG2,INCENP,EZH2,TFRC,CHAF1A,MAD2L1,AURKA,PLK4,PEG10,LMNB1,NASP,CCNA2,HELLS,BIRC5,IGF2,MCM4,TYROBP,PLK1,SOX11,MEST,CDCA8,RSPO3,CCNE2,CDC20,NOTCH1"
Mouse Phenotype	MP:0005384	cellular phenotype	 	0	43	1157	"TACC3,H19,KIT,CHEK1,PTTG1,GPC3,FEN1,FBXO5,GINS1,RAD51,BARD1,CENPA,TRIP13,CENPE,E2F8,BUB1B,BUB1,GMNN,XIST,ITGA2,CKS1B,TFRC,LYZ,CHAF1A,MAD2L1,AURKA,PLK4,PEG10,LMNB1,NDN,HELLS,IGF2BP1,BIRC5,IGF2,MCM4,H2AFX,PLK1,MEST,PLAGL1,CDCA8,GSTA4,CDC20,NOTCH1"
Mouse Phenotype	MP:0003077	abnormal cell cycle	 	0	16	165	"TACC3,CHEK1,PTTG1,FBXO5,CENPA,CENPE,BUB1B,BUB1,GMNN,MAD2L1,AURKA,BIRC5,MCM4,PLK1,CDCA8,CDC20"
Mouse Phenotype	MP:0008762	embryonic lethality	 	0	41	1119	"TACC3,KIF11,KIT,CHEK1,PTTG1,FEN1,MRC1,FBXO5,GINS1,RAD51,BARD1,CENPA,CENPE,E2F8,BUB1B,BUB1,GMNN,XIST,NCAPG2,INCENP,IMPDH2,EZH2,TFRC,CHAF1A,MAD2L1,AURKA,PLK4,PEG10,NASP,CCNA2,BIRC5,MCM4,H2AFX,PLK1,CDCA8,RPSA,RSPO3,CCNE2,CDC20,CDC2,NOTCH1"
Mouse Phenotype	MP:0009760	abnormal mitotic spindle	 	0	6	12	"PTTG1,FBXO5,BUB1,AURKA,BIRC5,PLK1"
Mouse Phenotype	MP:0003121	genomic imprinting	 	0	9	43	"H19,GPC3,XIST,PEG10,NDN,HELLS,IGF2,MEST,PLAGL1"
Mouse Phenotype	MP:0009850	embryonic lethality between implantation and placentation	 	0	21	344	"KIF11,CHEK1,MRC1,GINS1,RAD51,BARD1,CENPA,CENPE,BUB1B,BUB1,GMNN,XIST,NCAPG2,INCENP,EZH2,MAD2L1,PLK4,CCNA2,BIRC5,MCM4,CDC20"
Mouse Phenotype	MP:0006205	embryonic lethality before somite formation	 	0	18	255	"KIF11,CHEK1,MRC1,GINS1,RAD51,CENPA,CENPE,BUB1,GMNN,XIST,NCAPG2,EZH2,MAD2L1,PLK4,CCNA2,BIRC5,MCM4,CDC20"
Mouse Phenotype	MP:0002718	abnormal inner cell mass	 	0	10	75	"CHEK1,FEN1,FBXO5,BARD1,CENPA,GMNN,INCENP,EZH2,MAD2L1,BIRC5"
Mouse Phenotype	MP:0004196	abnormal prenatal growth/weight/body size	 	0	31	778	"TACC3,KIF11,H19,PTTG1,GPC3,FEN1,RAD51,SUV39H2,BARD1,CENPA,E2F8,BUB1,XIST,EZH2,TFRC,MAD2L1,PLK4,PEG10,LMNB1,NASP,HELLS,IGF2BP1,IGF2,MCM4,MEST,PLAGL1,RPSA,RSPO3,CCNE2,CDC20,NOTCH1"
Mouse Phenotype	MP:0001697	abnormal embryo size	 	0	23	471	"TACC3,KIF11,H19,PTTG1,FEN1,RAD51,SUV39H2,BARD1,CENPA,E2F8,XIST,EZH2,MAD2L1,PLK4,LMNB1,NASP,HELLS,IGF2,MEST,RSPO3,CCNE2,CDC20,NOTCH1"
Mouse Phenotype	MP:0000358	abnormal cell content/ morphology	 	0.000001	16	240	"KIT,CHEK1,PTTG1,CENPA,BUB1,GMNN,CHAF1A,MAD2L1,AURKA,LMNB1,HELLS,BIRC5,MCM4,PLK1,CDCA8,CDC20"
Mouse Phenotype	MP:0001698	decreased embryo size	 	0.000001	22	464	"TACC3,KIF11,PTTG1,FEN1,RAD51,SUV39H2,BARD1,CENPA,E2F8,XIST,EZH2,MAD2L1,PLK4,LMNB1,NASP,HELLS,IGF2,MEST,RSPO3,CCNE2,CDC20,NOTCH1"
Mouse Phenotype	MP:0003122	maternal imprinting	 	0.000002	6	25	"GPC3,PEG10,NDN,IGF2,MEST,PLAGL1"
Mouse Phenotype	MP:0005621	abnormal cell physiology	 	0.000002	35	1045	"TACC3,H19,CHEK1,PTTG1,FEN1,FBXO5,GINS1,RAD51,BARD1,CENPA,TRIP13,CENPE,E2F8,BUB1B,BUB1,GMNN,XIST,ITGA2,CKS1B,TFRC,LYZ,MAD2L1,AURKA,PLK4,LMNB1,HELLS,IGF2BP1,BIRC5,MCM4,H2AFX,PLK1,CDCA8,GSTA4,CDC20,NOTCH1"
Mouse Phenotype	MP:0004023	abnormal chromosome number	 	0.000002	7	39	"CENPA,BUB1,MAD2L1,AURKA,HELLS,PLK1,CDC20"
Mouse Phenotype	MP:0004957	abnormal blastocyst morphology	 	0.000002	10	96	"CHEK1,FEN1,FBXO5,BARD1,CENPA,GMNN,INCENP,EZH2,MAD2L1,BIRC5"
Mouse Phenotype	MP:0002088	abnormal embryonic growth/weight/body size	 	0.000003	26	653	"TACC3,KIF11,H19,PTTG1,FEN1,RAD51,SUV39H2,BARD1,CENPA,E2F8,XIST,EZH2,TFRC,MAD2L1,PLK4,PEG10,LMNB1,NASP,HELLS,IGF2,MCM4,MEST,RSPO3,CCNE2,CDC20,NOTCH1"
Mouse Phenotype	MP:0004024	aneuploidy	 	0.000003	6	28	"CENPA,BUB1,MAD2L1,AURKA,PLK1,CDC20"
Mouse Phenotype	MP:0008014	lung tumor	 	0.000013	8	73	"FEN1,BUB1,ROBO1,LYZ,MAD2L1,AURKA,MCM4,PLK1"
Mouse Phenotype	MP:0009762	abnormal mitotic spindle assembly checkpoint	 	0.000014	3	4	"BUB1B,BUB1,MAD2L1"
Mouse Phenotype	MP:0000352	decreased cell proliferation	 	0.000017	13	211	"CHEK1,PTTG1,FEN1,RAD51,BUB1,GMNN,AURKA,LMNB1,HELLS,IGF2BP1,MCM4,H2AFX,CDC20"
Mouse Phenotype	MP:0003694	failure to hatch from the zona pellucida	 	0.000021	5	23	"KIF11,CHEK1,AURKA,BIRC5,CDCA8"
Mouse Phenotype	MP:0001648	abnormal apoptosis	 	0.000026	17	361	"CHEK1,GINS1,RAD51,CENPA,E2F8,BUB1B,BUB1,TFRC,LYZ,MAD2L1,AURKA,PLK4,BIRC5,H2AFX,CDCA8,CDC20,NOTCH1"
Mouse Phenotype	MP:0003693	abnormal embryo hatching	 	0.000039	5	26	"KIF11,CHEK1,AURKA,BIRC5,CDCA8"
Mouse Phenotype	MP:0002038	carcinoma	 	0.00005	11	170	"H19,CHEK1,BARD1,BUB1B,BUB1,ROBO1,LYZ,MAD2L1,AURKA,MCM4,PLK1"
Mouse Phenotype	MP:0008866	chromosomal instability	 	0.000066	7	67	"BARD1,CENPE,BUB1B,MAD2L1,AURKA,MCM4,H2AFX"
Mouse Phenotype	MP:0001711	abnormal placenta morphology	 	0.000074	15	315	"H19,DLGAP5,GPC3,FEN1,FBXO5,CENPA,GMNN,PEG10,BIRC5,IGF2,TYROBP,MEST,RSPO3,CCNE2,NOTCH1"
Mouse Phenotype	MP:0002086	abnormal extraembryonic tissue morphology	 	0.00008	21	560	"H19,DLGAP5,GPC3,FEN1,FBXO5,CENPA,E2F8,GMNN,XIST,INCENP,EZH2,TFRC,PEG10,BIRC5,IGF2,TYROBP,SOX11,MEST,RSPO3,CCNE2,NOTCH1"
Mouse Phenotype	MP:0004966	abnormal inner cell mass proliferation	 	0.000081	5	30	"CHEK1,GINS1,CENPE,NCAPG2,MCM4"
Mouse Phenotype	MP:0000313	abnormal cell death	 	0.000099	20	525	"CHEK1,PTTG1,FEN1,GINS1,RAD51,CENPA,E2F8,BUB1B,BUB1,TFRC,LYZ,MAD2L1,AURKA,PLK4,HELLS,BIRC5,H2AFX,CDCA8,CDC20,NOTCH1"
Mouse Phenotype	MP:0009308	adenocarcinoma	 	0.000099	8	96	"H19,CHEK1,BARD1,BUB1B,ROBO1,LYZ,MAD2L1,MCM4"
Mouse Phenotype	MP:0004260	enlarged placenta	 	0.000106	4	17	"H19,GPC3,IGF2,TYROBP"
Mouse Phenotype	MP:0002018	malignant tumors	 	0.000114	12	219	"H19,CHEK1,FEN1,BARD1,BUB1B,BUB1,ROBO1,LYZ,MAD2L1,AURKA,MCM4,PLK1"
Mouse Phenotype	MP:0008714	lung carcinoma	 	0.000128	6	52	"ROBO1,LYZ,MAD2L1,AURKA,MCM4,PLK1"
Mouse Phenotype	MP:0009674	decreased birth weight	 	0.000128	6	52	"H19,BUB1,HELLS,IGF2,SOX11,PLAGL1"
Mouse Phenotype	MP:0009672	abnormal birth weight	 	0.000128	6	52	"H19,BUB1,HELLS,IGF2,SOX11,PLAGL1"
Mouse Phenotype	MP:0004965	inner cell mass degeneration	 	0.000209	4	20	"FEN1,BARD1,CENPA,BIRC5"
Mouse Phenotype	MP:0006042	increased apoptosis	 	0.000212	12	234	"CHEK1,GINS1,RAD51,E2F8,TFRC,LYZ,MAD2L1,AURKA,H2AFX,CDCA8,CDC20,NOTCH1"
Mouse Phenotype	MP:0002020	increased tumor incidence	 	0.000254	17	433	"H19,KIT,CHEK1,FEN1,SUV39H2,BARD1,BUB1B,BUB1,ROBO1,CKS1B,LYZ,MAD2L1,AURKA,MCM4,H2AFX,PLK1,CDC20"
Mouse Phenotype	MP:0004045	abnormal cell cycle checkpoint function	 	0.000258	5	38	"CHEK1,PTTG1,BUB1B,BUB1,MAD2L1"
Mouse Phenotype	MP:0004920	increased placenta weight	 	0.000276	3	9	"H19,GPC3,IGF2"
Mouse Phenotype	MP:0004257	abnormal placenta weight	 	0.000309	4	22	"H19,GPC3,IGF2,MEST"
Mouse Phenotype	MP:0002019	abnormal tumor incidence	 	0.000319	18	484	"H19,KIT,CHEK1,FEN1,SUV39H2,BARD1,HMMR,BUB1B,BUB1,ROBO1,CKS1B,LYZ,MAD2L1,AURKA,MCM4,H2AFX,PLK1,CDC20"
Mouse Phenotype	MP:0004258	abnormal placenta size	 	0.000374	6	63	"H19,GPC3,PEG10,IGF2,TYROBP,MEST"
Mouse Phenotype	MP:0000350	abnormal cell proliferation	 	0.000387	13	287	"CHEK1,PTTG1,FEN1,RAD51,BUB1,GMNN,AURKA,LMNB1,HELLS,IGF2BP1,MCM4,H2AFX,CDC20"
Mouse Phenotype	MP:0002166	altered tumor susceptibility	 	0.000831	18	524	"H19,KIT,CHEK1,FEN1,SUV39H2,BARD1,HMMR,BUB1B,BUB1,ROBO1,CKS1B,LYZ,MAD2L1,AURKA,MCM4,H2AFX,PLK1,CDC20"
Mouse Phenotype	MP:0002006	tumorigenesis	 	0.000831	18	524	"H19,KIT,CHEK1,FEN1,SUV39H2,BARD1,HMMR,BUB1B,BUB1,ROBO1,CKS1B,LYZ,MAD2L1,AURKA,MCM4,H2AFX,PLK1,CDC20"
Mouse Phenotype	MP:0005169	abnormal male meiosis	 	0.000851	7	101	"SUV39H2,TRIP13,SGOL2,CKS2,H2AFX,CCNE2,CDC2"
Mouse Phenotype	MP:0008932	abnormal embryonic tissue physiology	 	0.000891	6	74	"KIT,CHEK1,GINS1,CENPE,NCAPG2,MCM4"
Mouse Phenotype	MP:0003123	paternal imprinting	 	0.000898	3	13	"H19,GPC3,HELLS"
Mouse Phenotype	MP:0004964	absent inner cell mass	 	0.00113	3	14	"FEN1,GMNN,INCENP"
Mouse Phenotype	MP:0000057	abnormal osteogenesis	 	0.001314	10	210	"TACC3,H19,GPC3,LYZ,LMNB1,HELLS,IGF2,TYROBP,SOX11,PLAGL1"
Mouse Phenotype	MP:0005505	increased platelet cell number	 	0.001349	4	32	"KIT,LYZ,PF4,HBA2"
Mouse Phenotype	MP:0001730	embryonic growth arrest	 	0.001362	10	211	"KIF11,GINS1,RAD51,GMNN,CHAF1A,AURKA,NASP,PLK1,RSPO3,NOTCH1"
Mouse Phenotype	MP:0009265	delayed eyelid fusion	 	0.001374	2	4	"H19,IGF2"
Mouse Phenotype	MP:0004028	chromosome breakage	 	0.001454	5	55	"BARD1,BUB1B,MAD2L1,MCM4,H2AFX"
Mouse Phenotype	MP:0005629	abnormal lung weight	 	0.0017	4	34	"GPC3,FEN1,LYZ,NOL3"
Mouse Phenotype	MP:0002663	failure to form blastocele	 	0.001701	3	16	"FBXO5,INCENP,BIRC5"
Mouse Phenotype	MP:0002022	lymphoma	 	0.001768	8	147	"FEN1,SUV39H2,ROBO1,CKS1B,AURKA,H2AFX,PLK1,CDC20"
Mouse Phenotype	MP:0004197	abnormal fetal growth/weight/body size	 	0.001996	9	185	"H19,BUB1,HELLS,IGF2BP1,IGF2,MCM4,MEST,PLAGL1,RPSA"
Mouse Phenotype	MP:0001930	abnormal meiosis	 	0.002012	7	117	"SUV39H2,TRIP13,SGOL2,CKS2,H2AFX,CCNE2,CDC2"
Domain	G3DSA:1.10.20.10	Histone-fold	Gene3D	0	9	62	"CENPA,HIST1H2BK,HIST1H2BH,HIST1H2BM,HIST1H2BL,HIST1H2BN,APITD1,H2AFX,HIST1H2BJ"
Domain	PF00125	Histone	Pfam	0	8	45	"CENPA,HIST1H2BK,HIST1H2BH,HIST1H2BM,HIST1H2BL,HIST1H2BN,H2AFX,HIST1H2BJ"
Domain	IPR007125	Histone_core_D	InterPro	0	8	45	"CENPA,HIST1H2BK,HIST1H2BH,HIST1H2BM,HIST1H2BL,HIST1H2BN,H2AFX,HIST1H2BJ"
Domain	PD000497	Histone_H2B	ProDom	0	6	19	"HIST1H2BK,HIST1H2BH,HIST1H2BM,HIST1H2BL,HIST1H2BN,HIST1H2BJ"
Domain	SM00427	H2B	SMART	0	6	19	"HIST1H2BK,HIST1H2BH,HIST1H2BM,HIST1H2BL,HIST1H2BN,HIST1H2BJ"
Domain	IPR000558	Histone_H2B	InterPro	0	6	19	"HIST1H2BK,HIST1H2BH,HIST1H2BM,HIST1H2BL,HIST1H2BN,HIST1H2BJ"
Domain	PS00357	HISTONE_H2B	PROSITE	0	6	19	"HIST1H2BK,HIST1H2BH,HIST1H2BM,HIST1H2BL,HIST1H2BN,HIST1H2BJ"
Domain	IPR009072	Histone-fold	InterPro	0	9	66	"CENPA,HIST1H2BK,HIST1H2BH,HIST1H2BM,HIST1H2BL,HIST1H2BN,APITD1,H2AFX,HIST1H2BJ"
Domain	PF02984	Cyclin_C	Pfam	0.000009	4	11	"CCNB1,CCNA2,CCNE2,CCNB2"
Domain	IPR004367	Cyclin_C	InterPro	0.000009	4	11	"CCNB1,CCNA2,CCNE2,CCNB2"
Domain	G3DSA:1.10.472.10	Cyclin_related	Gene3D	0.000026	5	27	"CCNB1,CCNA2,ORC6L,CCNE2,CCNB2"
Domain	IPR013763	Cyclin_related	InterPro	0.000031	5	28	"CCNB1,CCNA2,ORC6L,CCNE2,CCNB2"
Domain	PF02953	zf-Tim10_DDP	Pfam	0.000046	3	6	"TIMM8A,TIMM13,TIMM10"
Domain	IPR004217	Znf_Tim10_DDP	InterPro	0.000046	3	6	"TIMM8A,TIMM13,TIMM10"
Domain	PS50067	KINESIN_MOTOR_DOMAIN2	PROSITE	0.000082	5	34	"KIF11,CENPE,KIF23,KIF4A,KIF20B"
Domain	PS00411	KINESIN_MOTOR_DOMAIN1	PROSITE	0.000082	5	34	"KIF11,CENPE,KIF23,KIF4A,KIF20B"
Domain	IPR011028	Cyclin_like	InterPro	0.000094	5	35	"CCNB1,CCNA2,ORC6L,CCNE2,CCNB2"
Domain	PS00292	CYCLINS	PROSITE	0.000126	4	20	"CCNB1,CCNA2,CCNE2,CCNB2"
Domain	IPR000789	Cyc_dep_kin_rsub	InterPro	0.000178	2	2	"CKS1B,CKS2"
Domain	SM00777	Mad3_BUB1_I	SMART	0.000178	2	2	"BUB1B,BUB1"
Domain	IPR013212	Mad3_BUB1_I	InterPro	0.000178	2	2	"BUB1B,BUB1"
Domain	PF01111	CKS	Pfam	0.000178	2	2	"CKS1B,CKS2"
Domain	PD005152	Cyc_dep_kin_rsub	ProDom	0.000178	2	2	"CKS1B,CKS2"
Domain	PS00945	CKS_2	PROSITE	0.000178	2	2	"CKS1B,CKS2"
Domain	PS00944	CKS_1	PROSITE	0.000178	2	2	"CKS1B,CKS2"
Domain	PF08311	Mad3_BUB1_I	Pfam	0.000178	2	2	"BUB1B,BUB1"
Domain	PF00134	Cyclin_N	Pfam	0.000187	4	22	"CCNB1,CCNA2,CCNE2,CCNB2"
Domain	IPR006671	Cyclin_N	InterPro	0.000224	4	23	"CCNB1,CCNA2,CCNE2,CCNB2"
Domain	SM00398	HMG	SMART	0.000257	5	43	"HMGB2,HMGB3,TOX4,WDHD1,SOX11"
Domain	IPR000910	HMG_1/2_box	InterPro	0.000287	5	44	"HMGB2,HMGB3,TOX4,WDHD1,SOX11"
Domain	PS50118	HMG_BOX_2	PROSITE	0.000287	5	44	"HMGB2,HMGB3,TOX4,WDHD1,SOX11"
Domain	G3DSA:1.10.30.10	HMG-box	Gene3D	0.000392	5	47	"HMGB2,HMGB3,TOX4,WDHD1,SOX11"
Domain	IPR006670	Cyclin	InterPro	0.000426	4	27	"CCNB1,CCNA2,CCNE2,CCNB2"
Domain	SM00385	CYCLIN	SMART	0.000426	4	27	"CCNB1,CCNA2,CCNE2,CCNB2"
Domain	IPR000135	HMG_1/2	InterPro	0.000609	3	13	"HMGB2,HMGB3,TOX4"
Domain	G3DSA:3.40.850.10	kinesin_motor	Gene3D	0.000644	4	30	"CENPE,KIF23,KIF4A,KIF20B"
Domain	PF00225	Kinesin	Pfam	0.000644	4	30	"CENPE,KIF23,KIF4A,KIF20B"
Domain	SM00129	KISc	SMART	0.000644	4	30	"CENPE,KIF23,KIF4A,KIF20B"
Domain	IPR001752	kinesin_motor	InterPro	0.000644	4	30	"CENPE,KIF23,KIF4A,KIF20B"
Domain	IPR009071	HMG-box	InterPro	0.00075	5	54	"HMGB2,HMGB3,TOX4,WDHD1,SOX11"
Domain	IPR008921	Pol_clamp_load_C	InterPro	0.001048	2	4	"RFC3,RFC4"
Domain	SM00527	HMG17	SMART	0.001731	2	5	"HMGN2,HMGN5"
Domain	PF01101	HMG14_17	Pfam	0.001731	2	5	"HMGN2,HMGN5"
Domain	IPR000079	HMG_14_17	InterPro	0.001731	2	5	"HMGN2,HMGN5"
Domain	PS00355	HMG14_17	PROSITE	0.001731	2	5	"HMGN2,HMGN5"
Domain	IPR010935	SMC_hinge	InterPro	0.001731	2	5	"SMC4,SMC2"
Domain	PF06470	SMC_hinge	Pfam	0.001731	2	5	"SMC4,SMC2"
Domain	PF00505	HMG_box	Pfam	0.002323	4	42	"HMGB2,HMGB3,TOX4,SOX11"
Domain	PD004495	Ribosomal_L7A	ProDom	0.002574	2	6	"NHP2,RPS12"
Domain	SM00350	MCM	SMART	0.003572	2	7	"MCM4,MCM6"
Domain	IPR009134	VEGFR_N	InterPro	0.003572	2	7	"KIT,HMCN1"
Domain	PD001041	MCM	ProDom	0.003572	2	7	"MCM4,MCM6"
Domain	PS00847	MCM_1	PROSITE	0.003572	2	7	"MCM4,MCM6"
Domain	IPR001208	MCM	InterPro	0.003572	2	7	"MCM4,MCM6"
Domain	PS00353	HMG_BOX_1	PROSITE	0.003572	2	7	"HMGB2,HMGB3"
Domain	PF00493	MCM	Pfam	0.003572	2	7	"MCM4,MCM6"
Domain	PS50051	MCM_2	PROSITE	0.003572	2	7	"MCM4,MCM6"
Pathway	69278	Cell Cycle (Mitotic)	Reactome	0	26	151	"RFC3,PTTG1,FEN1,RFC4,FBXO5,GINS1,BUB1B,GMNN,WEE1,PRIM1,KIF23,MAD2L1,AURKA,CCNB1,CCNA2,ORC6L,MCM4,MCM6,PLK1,CCNE2,CCNB2,RRM2,CDC25C,UBE2C,CDC20,CDC2"
Pathway	plk1_pathway	PLK1 signaling events	NCI-Nature Curated	0	17	44	"FBXO5,CENPE,NDC80,TPX2,BUB1B,BUB1,WEE1,INCENP,ERCC6L,AURKA,SPC24,CCNB1,PLK1,CDC25C,SGOL1,CDC20,CDC2"
Pathway	CELL_CYCLE_KEGG	CELLCLEG	MSigDB	0	18	90	"CHEK1,PTTG1,DBF4,BUB1B,BUB1,WEE1,MAD2L1,CCNB1,CCNA2,ORC6L,MCM4,MCM6,PLK1,CCNE2,CCNB2,CDC25C,CDC20,CDC2"
Pathway	aurora_b_pathway	Aurora B signaling	NCI-Nature Curated	0	13	40	"NCAPH,CENPA,NDC80,BUB1,NCAPG,INCENP,KIF23,AURKA,BIRC5,SMC4,SMC2,CDCA8,SGOL1"
Pathway	hsa04110	Cell cycle	KEGG pathway	0	18	119	"CHEK1,PTTG1,DBF4,BUB1B,BUB1,WEE1,MAD2L1,CCNB1,CCNA2,ORC6L,MCM4,MCM6,PLK1,CCNE2,CCNB2,CDC25C,CDC20,CDC2"
Pathway	69620	Cell Cycle Checkpoints	Reactome	0	16	103	"RFC3,CHEK1,RFC4,BUB1B,WEE1,MAD2L1,CCNB1,ORC6L,MCM4,MCM6,CCNE2,CCNB2,CDC25C,UBE2C,CDC20,CDC2"
Pathway	foxm1pathway	FOXM1 transcription factor network	NCI-Nature Curated	0	9	40	"CENPA,CENPF,CKS1B,CCNB1,CCNA2,BIRC5,PLK1,CCNB2,CDC2"
Pathway	DNA_REPLICATION_REACTOME	DNA_REPLICATION_REACTOME	MSigDB	0	8	48	"RFC3,RFC4,DBF4,GMNN,PRIM1,ORC6L,MCM4,MCM6"
Pathway	69306	DNA Replication	Reactome	0	10	85	"RFC3,FEN1,RFC4,GINS1,GMNN,PRIM1,CCNA2,ORC6L,MCM4,MCM6"
Pathway	G2PATHWAY	G2PATHWAY	MSigDB	0.000001	6	24	"CHEK1,WEE1,CCNB1,PLK1,CDC25C,CDC2"
Pathway	aurora_a_pathway	Aurora A signaling	NCI-Nature Curated	0.000005	6	31	"TACC3,DLGAP5,CENPA,TPX2,AURKA,BIRC5"
Pathway	CDC25PATHWAY	CDC25PATHWAY	MSigDB	0.000006	4	9	"CHEK1,WEE1,CDC25C,CDC2"
Pathway	h_ranMSpathway	Role of Ran in mitotic spindle regulation	CGAP BioCarta	0.000009	4	10	"KPNA2,TPX2,KIF15,AURKA"
Pathway	hsa03030	DNA replication	KEGG pathway	0.000013	6	36	"RFC3,FEN1,RFC4,PRIM1,MCM4,MCM6"
Pathway	h_g2Pathway	Cell Cycle: G2/M Checkpoint	CGAP BioCarta	0.000015	5	22	"CHEK1,WEE1,CCNB1,PLK1,CDC2"
Pathway	RBPATHWAY	RBPATHWAY	MSigDB	0.000031	4	13	"CHEK1,WEE1,CDC25C,CDC2"
Pathway	G1_TO_S_CELL_CYCLE_REACTOME	G1_TO_S_CELLCLE_REACTOME	MSigDB	0.000077	7	70	"WEE1,PRIM1,CCNB1,ORC6L,MCM4,MCM6,CCNE2"
Pathway	h_cdc25Pathway	cdc25 and chk1 Regulatory in response to DNA damage	CGAP BioCarta	0.000109	3	7	"CHEK1,WEE1,CDC2"
Pathway	SA_G2_AND_M_PHASES	SA_G2_AND_M_PHASES	MSigDB	0.000173	3	8	"CHEK1,WEE1,CDC2"
Pathway	15869	Nucleotide metabolism	Reactome	0.000195	7	81	"DCTD,IMPDH2,UMPS,UCK2,CTPS,RRM2,NME4"
Pathway	PRPP-PWY	his+purine+pyrimidine biosynthesis	BioCyc	0.000205	5	37	"IMPDH2,UMPS,CTPS,RRM2,NME4"
Pathway	PW:0000096	G2/M checkpoint	Pathway Ontology	0.000222	2	2	"CCNB1,CDC2"
Pathway	PW:0000091	G2/M transition	Pathway Ontology	0.000222	2	2	"CCNB1,CDC2"
Pathway	PW:0000385	G2/M DNA replication checkpoint	Pathway Ontology	0.000222	2	2	"CCNB1,CDC2"
Pathway	hsa00240	Pyrimidine metabolism	KEGG pathway	0.000458	7	93	"DCTD,PRIM1,UMPS,UCK2,CTPS,RRM2,NME4"
Pathway	SRCRPTPPATHWAY	SRCRPTPPATHWAY	MSigDB	0.000494	3	11	"CCNB1,CDC25C,CDC2"
Pathway	h_rbPathway	RB Tumor Suppressor/Checkpoint Signaling in response to DNA damage	CGAP BioCarta	0.000494	3	11	"CHEK1,WEE1,CDC2"
Pathway	PTC1PATHWAY	PTC1PATHWAY	MSigDB	0.000494	3	11	"CCNB1,CDC25C,CDC2"
Pathway	PWY0-162	de novo biosynthesis of pyrimidine ribonucleotides	BioCyc	0.000494	3	11	"UMPS,CTPS,NME4"
Pathway	hsa04115	p53 signaling pathway	KEGG pathway	0.000548	6	69	"CHEK1,CCNB1,CCNE2,CCNB2,RRM2,CDC2"
Pathway	PW:0000088	G1/S transition	Pathway Ontology	0.00066	2	3	"CCNB1,CDC2"
Pathway	PW:0000384	G2/M DNA damage checkpoint	Pathway Ontology	0.00066	2	3	"CCNB1,CDC2"
Pathway	plk_pathway	Polo-like kinase signaling events in the cell cycle	NCI-Nature Curated	0.001307	2	4	"PLK4,PLK1"
Pathway	PYRIMIDINE_METABOLISM	PYRIMIDINE_METABOLISM	MSigDB	0.0021	5	61	"DCTD,UMPS,UCK2,CTPS,RRM2"
Pathway	MAP00240_Pyrimidine_metabolism	MAP00240 Pyrimidine metabolism	GenMAPP	0.004077	4	44	"DCTD,UMPS,CTPS,RRM2"
Pathway	h_ptc1Pathway	Sonic Hedgehog (SHH) Receptor Ptc1 Regulates cell cycle	CGAP BioCarta	0.004443	2	7	"CCNB1,CDC2"
Pathway	MPRPATHWAY	MPRPATHWAY	MSigDB	0.004652	3	23	"CCNB1,CDC25C,CDC2"
Pathway	h_mPRPathway	How Progesterone Initiates the Oocyte Maturation	CGAP BioCarta	0.004652	3	23	"CCNB1,CDC25C,CDC2"
Pathway	hsa05322	Systemic lupus erythematosus	KEGG pathway	0.005703	7	144	"HIST1H2BK,HIST1H2BH,HIST1H2BM,HIST1H2BL,HIST1H2BN,H2AFX,HIST1H2BJ"
Pathway	h_srcRPTPPathway	Activation of Src by Protein-tyrosine phosphatase alpha	CGAP BioCarta	0.005866	2	8	"CCNB1,CDC2"
Pathway	h_plk3Pathway	Regulation of cell cycle progression by Plk3	CGAP BioCarta	0.005866	2	8	"CHEK1,CDC25C"
Pathway	PLK3PATHWAY	PLK3PATHWAY	MSigDB	0.005866	2	8	"CHEK1,CDC25C"
Pathway	P02738	De novo purine biosynthesis	PantherDB	0.006612	3	26	"IMPDH2,RRM2,NME4"
Pubmed	16565220	Phosphoproteome analysis of the human mitotic spindle.	 	0	32	210	"KIF11,KPNA2,DLGAP5,C14orf106,ARHGAP11A,ASPM,NCAPH,CENPE,CENPF,TOP2A,NDC80,HMMR,TPX2,SGOL2,CASC5,NUF2,SKA3,NCAPG2,NCAPG,INCENP,EZH2,KIF23,KIF4A,PRC1,SPC24,BIRC5,GSG2,CKAP2,SMC4,CDCA8,MKI67,CDC2"
Pubmed	15504738	"Genes affecting the cell cycle, growth, maintenance, and drug sensitivity are preferentially regulated by anti-HER2 antibody through phosphatidylinositol 3-kinase-AKT signaling."	 	0	9	19	"FEN1,RFC4,TOP2A,NDC80,HMGB2,BUB1B,CKS2,AURKA,UBE2C"
Pubmed	17388661	Exquisite sensitivity of TP53 mutant and basal breast cancers to a dose-dense epirubicin-cyclophosphamide regimen.	 	0	8	25	"CENPA,TOP2A,BUB1,CKS2,CCNB1,TTK,CCNB2,CDC20"
Pubmed	17210994	Breast cancer risk associated with genotypic polymorphism of the mitotic checkpoint genes: a multigenic study on cancer susceptibility.	 	0	5	5	"PTTG1,BUB1B,BUB1,MAD2L1,TTK"
Pubmed	16760428	Phosphorylation- and polo-box-dependent binding of Plk1 to Bub1 is required for the kinetochore localization of Plk1.	 	0	5	5	"BUB1B,BUB1,INCENP,PLK1,CDC2"
Pubmed	10366450	Characterization of MAD2B and other mitotic spindle checkpoint genes.	 	0	5	8	"BUB1B,BUB1,MAD2L1,TTK,CDC20"
Pubmed	15232106	Self-assembling protein microarrays.	 	0	7	30	"HAUS1,GMNN,ORC6L,MCM4,MCM6,CCNE2,CCNB2"
Pubmed	12791985	Sensing DNA damage through ATRIP recognition of RPA-ssDNA complexes.	 	0	7	32	"CHEK1,RFC4,DBF4,ORC6L,MCM4,MCM6,CDC25C"
Pubmed	12757711	Apoptotic phosphorylation of histone H2B is mediated by mammalian sterile twenty kinase.	 	0	6	18	"HIST1H2BK,HIST1H2BH,HIST1H2BM,HIST1H2BL,HIST1H2BN,HIST1H2BJ"
Pubmed	16283522	Inhibition of core histones acetylation by carcinogenic nickel(II).	 	0	6	18	"HIST1H2BK,HIST1H2BH,HIST1H2BM,HIST1H2BL,HIST1H2BN,HIST1H2BJ"
Pubmed	19468067	Mitotic control of kinetochore-associated dynein and spindle orientation by human Spindly.	 	0	5	9	"KNTC1,CENPA,NDC80,BUB1B,CCDC99"
Pubmed	15371340	A conserved protein network controls assembly of the outer kinetochore and its ability to sustain tension.	 	0	5	9	"NDC80,CASC5,NUF2,SPC24,SPC25"
Pubmed	16713563	Histone H2B monoubiquitination functions cooperatively with FACT to regulate elongation by RNA polymerase II.	 	0	6	19	"HIST1H2BK,HIST1H2BH,HIST1H2BM,HIST1H2BL,HIST1H2BN,HIST1H2BJ"
Pubmed	15297875	Essential roles of KIF4 and its binding partner PRC1 in organized central spindle midzone formation.	 	0	4	4	"CENPE,KIF23,KIF4A,PRC1"
Pubmed	14699129	Identification of two novel components of the human NDC80 kinetochore complex.	 	0	4	4	"NDC80,NUF2,SPC24,SPC25"
Pubmed	15961401	"Architecture of the human ndc80-hec1 complex, a critical constituent of the outer kinetochore."	 	0	4	4	"NDC80,NUF2,SPC24,SPC25"
Pubmed	18162579	Identification of novel human Cdt1-binding proteins by a proteomics approach: proteolytic regulation by APC/CCdh1.	 	0	6	22	"KPNA2,TOP2A,GMNN,MCM4,MCM6,CDC20"
Pubmed	16307923	Monoubiquitination of human histone H2B: the factors involved and their roles in HOX gene regulation.	 	0	6	23	"HIST1H2BK,HIST1H2BH,HIST1H2BM,HIST1H2BL,HIST1H2BN,HIST1H2BJ"
Pubmed	7494303	"Mutational analysis of cell cycle arrest, nuclear localization and virion packaging of human immunodeficiency virus type 1 Vpr."	 	0	5	12	"KPNA2,CCNB1,CCNB2,CDC25C,CDC2"
Pubmed	15525512	Phosphorylation of Cdc20 by Bub1 provides a catalytic mechanism for APC/C inhibition by the spindle checkpoint.	 	0	4	5	"BUB1B,BUB1,MAD2L1,CDC20"
Pubmed	15989971	Mutual inhibition of separase and Cdk1 by two-step complex formation.	 	0	4	5	"PTTG1,CKS2,CCNB1,CDC2"
Pubmed	10864927	An essential phosphorylation-site domain of human cdc25C interacts with both 14-3-3 and cyclins.	 	0	4	5	"CCNB1,CCNA2,CDC25C,CDC2"
Pubmed	11136719	Chromosome condensation by a human condensin complex in Xenopus egg extracts.	 	0	4	5	"NCAPH,NCAPG,SMC4,SMC2"
Pubmed	16622420	The CENP-H-I complex is required for the efficient incorporation of newly synthesized CENP-A into centromeres.	 	0	5	14	"CENPK,CENPA,APITD1,CENPH,CENPQ"
Pubmed	10064132	The human H2A and H2B histone gene complement.	 	0	5	14	"HIST1H2BK,HIST1H2BM,HIST1H2BL,HIST1H2BN,HIST1H2BJ"
Pubmed	7474100	Human immunodeficiency virus type 1 Vpr arrests the cell cycle in G2 by inhibiting the activation of p34cdc2-cyclin B.	 	0	4	6	"CCNB1,CCNB2,CDC25C,CDC2"
Pubmed	17268814	Genetic variation in the major mitotic checkpoint genes does not affect familial breast cancer risk.	 	0	4	6	"CENPE,BUB1B,MAD2L1,TTK"
Pubmed	16622419	The human CENP-A centromeric nucleosome-associated complex.	 	0	5	16	"CENPK,CENPA,APITD1,CENPH,CENPQ"
Pubmed	11310559	Identification of nuclear-import and cell-cycle regulatory proteins that bind to prothymosin alpha.	 	0	5	17	"KPNA2,CCNB1,CCNA2,NUTF2,CDC2"
Pubmed	16627869	Quantitative proteomic analysis of post-translational modifications of human histones.	 	0	5	17	"HIST1H2BK,HIST1H2BH,HIST1H2BL,HIST1H2BN,HIST1H2BJ"
Pubmed	11691994	Dynamic disruptions in nuclear envelope architecture and integrity induced by HIV-1 Vpr.	 	0	4	7	"WEE1,LMNB1,CCNB1,CDC25C"
Pubmed	15735702	BRCA1-mediated G2/M cell cycle arrest requires ERK1/2 kinase activation.	 	0	4	7	"CHEK1,WEE1,CDC25C,CDC2"
Pubmed	9520381	"HIV-1 Vpr interacts with a human 34-kDa mov34 homologue, a cellular factor linked to the G2/M phase transition of the mammalian cell cycle."	 	0	4	7	"CCNB1,CCNB2,CDC25C,CDC2"
Pubmed	14602875	Identification of the substrates and interaction proteins of aurora kinases from a protein-protein interaction model.	 	0	4	8	"TACC3,NDC80,NUF2,AURKA"
Pubmed	15148359	Isolation and characterization of a novel DNA methyltransferase complex linking DNMT3B with components of the mitotic chromosome condensation machinery.	 	0	4	8	"NCAPG,KIF4A,SMC4,SMC2"
Pubmed	9499405	The essential mitotic peptidyl-prolyl isomerase Pin1 binds and regulates mitosis-specific phosphoproteins.	 	0	4	8	"WEE1,CCNB1,PLK1,CDC25C"
Pubmed	16319397	Characterization of histone H2A and H2B variants and their post-translational modifications by mass spectrometry.	 	0	5	20	"HIST1H2BK,HIST1H2BH,HIST1H2BM,HIST1H2BL,HIST1H2BJ"
Pubmed	17679094	APC/C(Cdc20) controls the ubiquitin-mediated degradation of p21 in prometaphase.	 	0	4	9	"CCNB1,CCNA2,CDC20,CDC2"
Pubmed	11689053	Enhancement of the p300 HAT activity by HIV-1 Tat on chromatin DNA.	 	0	7	70	"HIST1H2BK,HIST1H2BH,HIST1H2BM,HIST1H2BL,HIST1H2BN,H2AFX,HIST1H2BJ"
Pubmed	15707391	DNA-dependent phosphorylation of Chk1 and Claspin in a human cell-free system.	 	0	5	23	"CHEK1,DBF4,ORC6L,MCM4,MCM6"
Pubmed	15541388	Characterization of a MAPKK-like protein kinase TOPK.	 	0	3	3	"PBK,CCNB1,CDC2"
Pubmed	7737117	"Human cyclins B1 and B2 are localized to strikingly different structures: B1 to microtubules, B2 primarily to the Golgi apparatus."	 	0	3	3	"CCNB1,CCNB2,CDC2"
Pubmed	11274370	Mammalian mad2 and bub1/bubR1 recognize distinct spindle-attachment and kinetochore-tension checkpoints.	 	0	3	3	"BUB1B,MAD2L1,CDC20"
Pubmed	9763420	Characterization of the kinetochore binding domain of CENP-E reveals interactions with the kinetochore proteins CENP-F and hBUBR1.	 	0	3	3	"CENPE,CENPF,BUB1B"
Pubmed	18471975	Cdc20 and Cks direct the spindle checkpoint-independent destruction of cyclin A.	 	0	3	3	"CKS1B,CCNA2,CDC20"
Pubmed	16571674	"Centromere targeting of the chromosomal passenger complex requires a ternary subcomplex of Borealin, Survivin, and the N-terminal domain of INCENP."	 	0	3	3	"INCENP,BIRC5,CDCA8"
Pubmed	8070405	The differential localization of human cyclins A and B is due to a cytoplasmic retention signal in cyclin B.	 	0	3	3	"CCNB1,CCNB2,CDC2"
Pubmed	16239925	Survivin mediates targeting of the chromosomal passenger complex to the centromere and midbody.	 	0	3	3	"INCENP,BIRC5,CDCA8"
Pubmed	11907259	Checkpoint protein BubR1 acts synergistically with Mad2 to inhibit anaphase-promoting complex.	 	0	3	3	"BUB1B,MAD2L1,CDC20"
Pubmed	17359356	"Mutational and expression analysis of CDK1, cyclinA2 and cyclinB1 in epilepsy-associated glioneuronal lesions."	 	0	3	3	"CCNB1,CCNA2,CDC2"
Pubmed	2227411	Human cDNAs encoding homologs of the small p34Cdc28/Cdc2-associated protein of Saccharomyces cerevisiae and Schizosaccharomyces pombe.	 	0	3	3	"CKS1B,CKS2,CDC2"
Pubmed	19154722	Unattached kinetochores catalyze production of an anaphase inhibitor that requires a Mad2 template to prime Cdc20 for BubR1 binding.	 	0	3	3	"BUB1B,MAD2L1,CDC20"
Pubmed	1384126	Inactivation of the p34cdc2-cyclin B complex by the human WEE1 tyrosine kinase.	 	0	3	3	"WEE1,CCNB1,CDC2"
Pubmed	19369249	Cdk1-cyclin B1-mediated phosphorylation of tumor-associated microtubule-associated protein/cytoskeleton-associated protein 2 in mitosis.	 	0	3	3	"CCNB1,CKAP2,CDC2"
Pubmed	17351640	Choice of Plk1 docking partners during mitosis and cytokinesis is controlled by the activation state of Cdk1.	 	0	3	3	"PRC1,PLK1,CDC2"
Pubmed	1717476	Human cyclins A and B1 are differentially located in the cell and undergo cell cycle-dependent nuclear transport.	 	0	3	3	"CCNB1,CCNB2,CDC2"
Pubmed	19117984	Functional interaction between BubR1 and securin in an anaphase-promoting complex/cyclosomeCdc20-independent manner.	 	0	3	3	"PTTG1,BUB1B,CDC20"
Pubmed	11799067	"E2F integrates cell cycle progression with DNA repair, replication, and G(2)/M checkpoints."	 	0	4	10	"CHEK1,BARD1,TOP2A,MAD2L1"
Pubmed	14657027	Regulation of HIV-1 gene expression by histone acetylation and factor recruitment at the LTR promoter.	 	0	7	74	"HIST1H2BK,HIST1H2BH,HIST1H2BM,HIST1H2BL,HIST1H2BN,H2AFX,HIST1H2BJ"
Pubmed	9566873	Transcriptional activation of the integrated chromatin-associated human immunodeficiency virus type 1 promoter.	 	0	7	74	"HIST1H2BK,HIST1H2BH,HIST1H2BM,HIST1H2BL,HIST1H2BN,H2AFX,HIST1H2BJ"
Pubmed	11531413	HIV-1 Vpr induces cell cycle G2 arrest in fission yeast (Schizosaccharomyces pombe) through a pathway involving regulatory and catalytic subunits of PP2A and acting on both Wee1 and Cdc25.	 	0	5	27	"WEE1,CCNB1,CCNB2,CDC25C,CDC2"
Pubmed	11080476	Acetylation of HIV-1 Tat by CBP/P300 increases transcription of integrated HIV-1 genome and enhances binding to core histones.	 	0.000001	7	87	"HIST1H2BK,HIST1H2BH,HIST1H2BM,HIST1H2BL,HIST1H2BN,H2AFX,HIST1H2BJ"
Pubmed	15931389	Microarray analysis identifies a death-from-cancer signature predicting therapy failure in patients with multiple types of cancer.	 	0.000001	4	13	"NDC80,BUB1,CCNB1,MKI67"
Pubmed	11836499	BRCA1 regulates the G2/M checkpoint by activating Chk1 kinase upon DNA damage.	 	0.000001	3	4	"CHEK1,CDC25C,CDC2"
Pubmed	8475101	Cdc25M2 activation of cyclin-dependent kinases by dephosphorylation of threonine-14 and tyrosine-15.	 	0.000001	3	4	"CCNB1,CCNA2,CDC2"
Pubmed	18592005	Loss of CHFR in human mammary epithelial cells causes genomic instability by disrupting the mitotic spindle assembly checkpoint.	 	0.000001	3	4	"MAD2L1,AURKA,CDC20"
Pubmed	18045986	KNL1 and the CENP-H/I/K complex coordinately direct kinetochore assembly in vertebrates.	 	0.000001	3	4	"CENPK,CASC5,CENPH"
Pubmed	17956729	Structure of a Survivin-Borealin-INCENP core complex reveals how chromosomal passengers travel together.	 	0.000001	3	4	"INCENP,BIRC5,CDCA8"
Pubmed	17617734	Shugoshin 1 plays a central role in kinetochore assembly and is required for kinetochore targeting of Plk1.	 	0.000001	3	4	"BUB1,PLK1,SGOL1"
Pubmed	15265780	Human immunodeficiency virus type-1 accessory protein Vpr: a causative agent of the AIDS-related insulin resistance/lipodystrophy syndrome?	 	0.000001	4	14	"WEE1,CCNB1,CDC25C,CDC2"
Pubmed	11285280	Anaphase-promoting complex/cyclosome-dependent proteolysis of human cyclin A starts at the beginning of mitosis and is not subject to the spindle assembly checkpoint.	 	0.000001	6	62	"BUB1B,MAD2L1,CCNB1,UBE2C,CDC20,CDC2"
Pubmed	10958988	Cell cycle G2 arrest induced by HIV-1 Vpr in fission yeast (Schizosaccharomyces pombe) is independent of cell death and early genes in the DNA damage checkpoint.	 	0.000002	3	5	"CCNB1,CCNB2,CDC2"
Pubmed	16751065	"HIV-1 Tat depresses DNA-PK(CS) expression and DNA repair, and sensitizes cells to ionizing radiation."	 	0.000002	3	5	"CCNB1,CDC25C,CDC20"
Pubmed	12196507	Rapid microtubule-independent dynamics of Cdc20 at kinetochores and centrosomes in mammalian cells.	 	0.000002	3	5	"BUB1B,MAD2L1,CDC20"
Pubmed	17981135	Human Blinkin/AF15q14 is required for chromosome alignment and the mitotic checkpoint through direct interaction with Bub1 and BubR1.	 	0.000002	3	5	"BUB1B,BUB1,CASC5"
Pubmed	15916961	The WD40 propeller domain of Cdh1 functions as a destruction box receptor for APC/C substrates.	 	0.000002	3	5	"PTTG1,CCNB1,CDC20"
Pubmed	11878934	Hypophosphorylation of poly(A) polymerase and increased polyadenylation activity are associated with human immunodeficiency virus type 1 Vpr expression.	 	0.000002	3	5	"CCNB1,CCNB2,CDC2"
Pubmed	12853968	Phosphorylation of human Fen1 by cyclin-dependent kinase modulates its role in replication fork regulation.	 	0.000002	3	5	"FEN1,CCNA2,CDC2"
Pubmed	11489896	Role of the deafness dystonia peptide 1 (DDP1) in import of human Tim23 into the inner membrane of mitochondria.	 	0.000002	3	5	"TIMM8A,TIMM13,TIMM10"
Pubmed	9094673	"Human immunodeficiency virus type 1 vpr gene induces phenotypic effects similar to those of the DNA alkylating agent, nitrogen mustard."	 	0.000002	3	5	"CCNB1,CCNB2,CDC2"
Pubmed	7474080	Human immunodeficiency virus type 1 viral protein R (Vpr) arrests cells in the G2 phase of the cell cycle by inhibiting p34cdc2 activity.	 	0.000002	3	5	"CCNB1,CCNB2,CDC2"
Pubmed	1828290	Dephosphorylation and activation of a p34cdc2/cyclin B complex in vitro by human CDC25 protein.	 	0.000002	3	5	"CCNB1,CDC25C,CDC2"
Pubmed	7666531	The human immunodeficiency virus type 1 vpr gene arrests infected T cells in the G2 + M phase of the cell cycle.	 	0.000002	3	5	"CCNB1,CCNB2,CDC2"
Pubmed	11907280	Cyclin A- and cyclin E-Cdk complexes shuttle between the nucleus and the cytoplasm.	 	0.000002	3	5	"CKS1B,CCNA2,CCNE2"
Pubmed	15249581	Borealin: a novel chromosomal passenger required for stability of the bipolar mitotic spindle.	 	0.000002	3	5	"INCENP,BIRC5,CDCA8"
Pubmed	19625176	PTEN identified as important risk factor of chronic obstructive pulmonary disease.	 	0.000002	12	376	"CHEK1,RAD51,BARD1,TFRC,AURKA,CCNA2,IGF2,PLK1,MEST,CTSH,CDC25C,GSTA4"
Pubmed	10793135	Mitotic regulation of the APC activator proteins CDC20 and CDH1.	 	0.000003	4	18	"CCNB1,PLK1,UBE2C,CDC2"
Pubmed	11535616	"Checkpoint inhibition of the APC/C in HeLa cells is mediated by a complex of BUBR1, BUB3, CDC20, and MAD2."	 	0.000003	4	18	"BUB1B,MAD2L1,UBE2C,CDC20"
Pubmed	14593737	The mitotic checkpoint: a signaling pathway that allows a single unattached kinetochore to inhibit mitotic exit.	 	0.000003	4	18	"BUB1B,MAD2L1,UBE2C,CDC20"
Pubmed	15009096	"Proteomics analysis of the centromere complex from HeLa interphase cells: UV-damaged DNA binding protein 1 (DDB-1) is a component of the CEN-complex, while BMI-1 is transiently co-localized with the centromeric region in interphase."	 	0.000003	5	40	"CENPK,CENPA,SHCBP1,KIF23,CENPH"
Pubmed	11790298	Directed proteomic analysis of the human nucleolus.	 	0.000003	9	208	"KPNA2,MRTO4,TOP2A,RPL12,RRP15,LMNB1,NHP2,RPS12,RPSA"
Pubmed	16198290	"Cdk1/Erk2- and Plk1-dependent phosphorylation of a centrosome protein, Cep55, is required for its recruitment to midbody and cytokinesis."	 	0.000003	3	6	"PLK1,CEP55,CDC2"
Pubmed	16457587	Gene-specific characterization of human histone H2B by electron capture dissociation.	 	0.000003	3	6	"HIST1H2BK,HIST1H2BH,HIST1H2BM"
Pubmed	9268380	Human Myt1 is a cell cycle-regulated kinase that inhibits Cdc2 but not Cdk2 activity.	 	0.000003	3	6	"WEE1,CDC25C,CDC2"
Pubmed	11095689	The human homolog of Saccharomyces cerevisiae Mcm10 interacts with replication factors and dissociates from nuclease-resistant nuclear structures in G(2) phase.	 	0.000004	4	19	"LMNB1,ORC6L,MCM4,MCM6"
Pubmed	10921877	Human immunodeficiency virus type 1 Vpr-mediated G(2) cell cycle arrest: Vpr interferes with cell cycle signaling cascades by interacting with the B subunit of serine/threonine protein phosphatase 2A.	 	0.000004	4	20	"CCNB1,CCNB2,CDC25C,CDC2"
Pubmed	15226314	Human claspin is a ring-shaped DNA-binding protein with high affinity to branched DNA structures.	 	0.000004	4	20	"DBF4,ORC6L,MCM4,MCM6"
Pubmed	12110603	Human immunodeficiency virus type 1 Vpr-mediated G(2) cell cycle arrest: Vpr interferes with cell cycle signaling cascades by interacting with the B subunit of serine/threonine protein phosphatase 2A.	 	0.000004	4	20	"CCNB1,CCNB2,CDC25C,CDC2"
Pubmed	11742988	APC/C-mediated destruction of the centrosomal kinase Nek2A occurs in early mitosis and depends upon a cyclin A-type D-box.	 	0.000004	4	20	"BUB1B,MAD2L1,UBE2C,CDC20"
Pubmed	11799066	Isolating human transcription factor targets by coupling chromatin immunoprecipitation and CpG island microarray analysis.	 	0.000005	4	21	"RAD51,HIST1H2BJ,TTK,PRR11"
Pubmed	19692168	Genetic Susceptibility to Distinct Bladder Cancer Subphenotypes.	 	0.000006	12	422	"CHEK1,RAD51,BARD1,TFRC,AURKA,CCNA2,IGF2,PLK1,MEST,CTSH,CDC25C,GSTA4"
Pubmed	9560267	"HIV transcriptional activation by the accessory protein, VPR, is mediated by the p300 co-activator."	 	0.000006	3	7	"CCNB1,CCNB2,CDC2"
Pubmed	9926943	Functional association of TGF-beta receptor II with cyclin B.	 	0.000006	3	7	"CCNB1,CCNB2,CDC2"
Pubmed	15800651	"3',5'-cyclic nucleotide phosphodiesterase 11A: localization in human tissues."	 	0.000006	3	7	"RAD51,CCNA2,CDC2"
Pubmed	11931757	Human origin recognition complex large subunit is degraded by ubiquitin-mediated proteolysis after initiation of DNA replication.	 	0.000007	4	22	"CCNA2,ORC6L,MCM4,MCM6"
Pubmed	19074885	Genetic variants in apoptosis and immunoregulation-related genes are associated with risk of chronic lymphocytic leukemia.	 	0.000009	8	179	"RAD51,TOP2A,BUB1B,GMNN,EZH2,BIRC5,MCM4,CDC25C"
Pubmed	15388328	WD repeat-containing mitotic checkpoint proteins act as transcriptional repressors during interphase.	 	0.00001	3	8	"BUB1B,BUB1,CDC20"
Pubmed	14993212	Cdt1 phosphorylation by cyclin A-dependent kinases negatively regulates its function without affecting geminin binding.	 	0.00001	3	8	"GMNN,CCNA2,CDC2"
Pubmed	15469984	Plk1 regulates activation of the anaphase promoting complex by phosphorylating and triggering SCFbetaTrCP-dependent destruction of the APC Inhibitor Emi1.	 	0.00001	3	8	"FBXO5,PLK1,CDC20"
Pubmed	7799941	Effects of phosphorylation by CAK on cyclin binding by CDC2 and CDK2.	 	0.00001	3	8	"CCNB1,CCNE2,CDC2"
Pubmed	18950845	Evaluating new candidate SNPs as low penetrance risk factors in sporadic breast cancer: A two-stage Spanish case-control study.	 	0.000011	6	88	"CHEK1,RAD51,BARD1,WEE1,PLK1,CDC2"
Pubmed	12614612	Interaction and assembly of murine pre-replicative complex proteins in yeast and mouse cells.	 	0.000011	4	25	"DBF4,ORC6L,MCM4,MCM6"
Pubmed	15782160	Mapping DNA-protein interactions in large genomes by sequence tag analysis of genomic enrichment.	 	0.000013	4	26	"ARHGAP11A,PBK,CCNA2,CDC2"
Pubmed	12766176	"Cloning and characterization of hCTF18, hCTF8, and hDCC1. Human homologs of a Saccharomyces cerevisiae complex involved in sister chromatid cohesion establishment."	 	0.000015	3	9	"RFC3,RFC4,DSCC1"
Pubmed	10846177	Human Cdc7-related kinase complex. In vitro phosphorylation of MCM by concerted actions of Cdks and Cdc7 and that of a criticial threonine residue of Cdc7 bY Cdks.	 	0.000015	3	9	"DBF4,MCM4,MCM6"
Pubmed	9439656	The human histone gene cluster at the D6S105 locus.	 	0.000015	5	55	"HIST1H2BH,HIST1H2BM,HIST1H2BL,HIST1H2BN,HIST1H2BJ"
Pubmed	11084331	Survivin and the inner centromere protein INCENP show similar cell-cycle localization and gene knockout phenotype.	 	0.000021	3	10	"CENPA,CENPE,BIRC5"
Pubmed	9822671	"Replication factor C disengages from proliferating cell nuclear antigen (PCNA) upon sliding clamp formation, and PCNA itself tethers DNA polymerase delta to DNA."	 	0.000021	3	10	"RFC3,RFC4,PRIM1"
Pubmed	18329369	Final stages of cytokinesis and midbody ring formation are controlled by BRUCE.	 	0.000021	3	10	"KIF23,PLK1,CDC2"
Pubmed	18997788	The APC/C maintains the spindle assembly checkpoint by targeting Cdc20 for destruction.	 	0.000021	3	10	"BUB1B,MAD2L1,CDC20"
Pubmed	8662825	Cyclin-dependent kinases are inactivated by a combination of p21 and Thr-14/Tyr-15 phosphorylation after UV-induced DNA damage.	 	0.000021	3	10	"CCNB1,CCNA2,CDC2"
Pubmed	12171929	A proteomics approach to identify proliferating cell nuclear antigen (PCNA)-binding proteins in human cell lysates. Identification of the human CHL12/RFCs2-5 complex as a novel PCNA-binding protein.	 	0.000028	4	31	"RFC3,FEN1,RFC4,DSCC1"
Pubmed	9244350	"BRCA1 proteins are transported to the nucleus in the absence of serum and splice variants BRCA1a, BRCA1b are tyrosine phosphoproteins that associate with E2F, cyclins and cyclin dependent kinases."	 	0.000028	3	11	"CCNB1,CCNA2,CDC2"
Pubmed	12930902	The alternative Ctf18-Dcc1-Ctf8-replication factor C complex required for sister chromatid cohesion loads proliferating cell nuclear antigen onto DNA.	 	0.000028	3	11	"RFC3,RFC4,DSCC1"
Pubmed	11782350	Genetic and epigenetic inactivation of mitotic checkpoint genes hBUB1 and hBUBR1 and their relationship to survival.	 	0.000032	2	2	"BUB1B,BUB1"
Pubmed	18573128	Genetic predisposition to idiopathic recurrent spontaneous abortion: contribution of genetic variations in IGF-2 and H19 imprinted genes.	 	0.000032	2	2	"H19,IGF2"
Pubmed	17472438	Cyclin B1-Cdk1 activation continues after centrosome separation to control mitotic progression.	 	0.000032	2	2	"CCNB1,CDC2"
Pubmed	18272575	Role of cellular phosphatase cdc25C in herpes simplex virus 1 replication.	 	0.000032	2	2	"CDC25C,CDC2"
Pubmed	11553328	The anaphase inhibitor Pds1 binds to the APC/C-associated protein Cdc20 in a destruction box-dependent manner.	 	0.000032	2	2	"PTTG1,CDC20"
Pubmed	17498870	Genomic instability and increased expression of BUB1B and MAD2L1 genes in ductal breast carcinoma.	 	0.000032	2	2	"BUB1B,MAD2L1"
Pubmed	19773751	Expression of EZH2 and Ki-67 in colorectal cancer and associations with treatment response and prognosis.	 	0.000032	2	2	"EZH2,MKI67"
Pubmed	14760118	The clinical significance of Cyclin B1 and Wee1 expression in non-small-cell lung cancer.	 	0.000032	2	2	"WEE1,CCNB1"
Pubmed	15148369	"Role of Polo-like kinase in the degradation of early mitotic inhibitor 1, a regulator of the anaphase promoting complex/cyclosome."	 	0.000032	2	2	"FBXO5,PLK1"
Pubmed	11889182	Association of H19 promoter methylation with the expression of H19 and IGF-II genes in adrenocortical tumors.	 	0.000032	2	2	"H19,IGF2"
Pubmed	14654001	Nuf2 and Hec1 are required for retention of the checkpoint proteins Mad1 and Mad2 to kinetochores.	 	0.000032	2	2	"NDC80,NUF2"
Pubmed	14738735	"The vertebrate Ndc80 complex contains Spc24 and Spc25 homologs, which are required to establish and maintain kinetochore-microtubule attachment."	 	0.000032	2	2	"SPC24,SPC25"
Pubmed	17410335	Expression of human MCM6 and DNA Topo II alpha in craniopharyngiomas and its correlation with recurrence of the tumor.	 	0.000032	2	2	"TOP2A,MCM6"
Pubmed	15964272	Polo-like kinase 1 creates the tension-sensing 3F3/2 phosphoepitope and modulates the association of spindle-checkpoint proteins at kinetochores.	 	0.000032	2	2	"NDC80,SPC24"
Pubmed	18358696	Hypomethylated and hypermethylated profiles of H19DMR are associated with the aberrant imprinting of IGF2 and H19 in human hepatocellular carcinoma.	 	0.000032	2	2	"H19,IGF2"
Pubmed	11792804	Kinetochore localisation and phosphorylation of the mitotic checkpoint components Bub1 and BubR1 are differentially regulated by spindle events in human cells.	 	0.000032	2	2	"BUB1B,BUB1"
Pubmed	11101512	The role of the TIM8-13 complex in the import of Tim23 into mitochondria.	 	0.000032	2	2	"TIMM8A,TIMM13"
Pubmed	15625105	Cell cycle-dependent translocation of PRC1 on the spindle by Kif4 is essential for midzone formation and cytokinesis.	 	0.000032	2	2	"KIF4A,PRC1"
Pubmed	17943598	Expression of PLK1 and survivin in diffuse large B-cell lymphoma.	 	0.000032	2	2	"BIRC5,PLK1"
Pubmed	15496454	Anillin binds nonmuscle myosin II and regulates the contractile ring.	 	0.000032	2	2	"ANLN,MYH10"
Pubmed	19585492	"Assessment of ""grading"" with Ki-67 and c-kit immunohistochemical expressions may be a helpful tool in management of patients with flat epithelial atypia (FEA) and columnar cell lesions (CCLs) on core breast biopsy."	 	0.000032	2	2	"KIT,MKI67"
Pubmed	15766665	"ON01910, a non-ATP-competitive small molecule inhibitor of Plk1, is a potent anticancer agent."	 	0.000032	2	2	"PLK1,CDC25C"
Pubmed	18247328	Involvement of the role of Chk1 in lithium-induced G2/M phase cell cycle arrest in hepatocellular carcinoma cells.	 	0.000032	2	2	"CHEK1,CDC2"
Pubmed	19503101	BubR1 localizes to centrosomes and suppresses centrosome amplification via regulating Plk1 activity in interphase cells.	 	0.000032	2	2	"BUB1B,PLK1"
Pubmed	12659864	"Crystallization and preliminary X-ray structural studies of hemoglobin A2 and hemoglobin E, isolated from the blood samples of beta-thalassemic patients."	 	0.000032	2	2	"HBA2,HBE1"
Pubmed	18272572	The interaction of herpes simplex virus 1 regulatory protein ICP22 with the cdc25C phosphatase is enabled in vitro by viral protein kinases US3 and UL13.	 	0.000032	2	2	"CDC25C,CDC2"
Pubmed	10681541	The Chk1 protein kinase and the Cdc25C regulatory pathways are targets of the anticancer agent UCN-01.	 	0.000032	2	2	"CHEK1,CDC25C"
Pubmed	18171681	Plk1-dependent phosphorylation regulates functions of DNA topoisomerase IIalpha in cell cycle progression.	 	0.000032	2	2	"TOP2A,PLK1"
Pubmed	8548803	"Phosphorylation by p34cdc2 regulates spindle association of human Eg5, a kinesin-related motor essential for bipolar spindle formation in vivo."	 	0.000032	2	2	"KIF11,CDC2"
Pubmed	1387877	Cytoplasmic accumulation of cyclin B1 in human cells: association with a detergent-resistant compartment and with the centrosome.	 	0.000032	2	2	"CCNB1,CCNA2"
Pubmed	16080195	Analysis of Aurora-A and hMPS1 mitotic kinases in mantle cell lymphoma.	 	0.000032	2	2	"AURKA,TTK"
Pubmed	15665856	The cell-cycle checkpoint kinase Chk1 is required for mammalian homologous recombination repair.	 	0.000032	2	2	"CHEK1,RAD51"
Pubmed	19015261	Multiple anaphase-promoting complex/cyclosome degrons mediate the degradation of human Sgo1.	 	0.000032	2	2	"BUB1,SGOL1"
Pubmed	7635160	Human topoisomerase II alpha is phosphorylated in a cell-cycle phase-dependent manner by a proline-directed kinase.	 	0.000032	2	2	"TOP2A,CDC2"
Pubmed	17535814	Human NUF2 interacts with centromere-associated protein E and is essential for a stable spindle microtubule-kinetochore attachment.	 	0.000032	2	2	"CENPE,NUF2"
Pubmed	11960377	Overexpression of B-type cyclins alters chromosomal segregation.	 	0.000032	2	2	"CCNB1,CCNB2"
Pubmed	19614764	Expression and prognostic significance of cyclin B1 and cyclin A in non-small cell lung cancer.	 	0.000032	2	2	"CCNB1,CCNA2"
Pubmed	10878014	The forkhead-associated domain of Ki-67 antigen interacts with the novel kinesin-like protein Hklp2.	 	0.000032	2	2	"KIF15,MKI67"
Pubmed	16436504	Uncoupling the central spindle-associated function of the chromosomal passenger complex from its role at centromeres.	 	0.000032	2	2	"BIRC5,CDCA8"
Pubmed	18671143	Cyclin B1 is an efficacy-predicting biomarker for Chk1 inhibitors.	 	0.000032	2	2	"CHEK1,CCNB1"
Pubmed	15235793	Kinetochore localization and microtubule interaction of the human spindle checkpoint kinase Mps1.	 	0.000032	2	2	"NDC80,NUF2"
Pubmed	17705509	Binding of TPX2 to Aurora A alters substrate and inhibitor interactions.	 	0.000032	2	2	"TPX2,AURKA"
Pubmed	8428596	Human Wee1 kinase inhibits cell division by phosphorylating p34cdc2 exclusively on Tyr15.	 	0.000032	2	2	"WEE1,CDC2"
Pubmed	15158907	"The prion-like protein Doppel fails to interact with itself, the prion protein and the 37 kDa/67 kDa laminin receptor in the yeast two-hybrid system."	 	0.000032	2	2	"PRND,RPSA"
Pubmed	18195732	Cyclin B1 is localized to unattached kinetochores and contributes to efficient microtubule attachment and proper chromosome alignment during mitosis.	 	0.000032	2	2	"CCNB1,CDC2"
Pubmed	11030144	p55CDC/hCDC20 is associated with BUBR1 and may be a downstream target of the spindle checkpoint kinase.	 	0.000032	2	2	"BUB1B,CDC20"
Pubmed	18353325	High expression levels of cyclin B1 and Polo-like kinase 1 in ectopic endometrial cells associated with abnormal cell cycle regulation of endometriosis.	 	0.000032	2	2	"CCNB1,PLK1"
Pubmed	7985025	Requirement for intron-encoded U22 small nucleolar RNA in 18S ribosomal RNA maturation.	 	0.000032	2	2	"SNORD22,SNHG1"
Pubmed	15645136	Down-regulation of the IGF-2/H19 locus during normal and malignant hematopoiesis is independent of the imprinting pattern.	 	0.000032	2	2	"H19,IGF2"
Pubmed	11861764	Survivin exists in immunochemically distinct subcellular pools and is involved in spindle microtubule function.	 	0.000032	2	2	"BIRC5,CDC2"
Pubmed	18663142	Building a spindle of the correct length in human cells requires the interaction between TPX2 and Aurora A.	 	0.000032	2	2	"TPX2,AURKA"
Pubmed	16582488	The renin-angiotensin-aldosterone system: a specific target for hypertension management.	 	0.000032	2	2	"PLK1,CDC25C"
Pubmed	16649252	Checkpoint kinase 1-mediated phosphorylation of Cdc25C and bad proteins are involved in antitumor effects of loratadine-induced G2/M phase cell-cycle arrest and apoptosis.	 	0.000032	2	2	"CHEK1,CDC25C"
Pubmed	18799590	Cyclin-dependent kinase 1/cyclin B1 phosphorylates varicella-zoster virus IE62 and is incorporated into virions.	 	0.000032	2	2	"CCNB1,CDC2"
Pubmed	15713649	The functional region of CENP-H interacts with the Nuf2 complex that localizes to centromere during mitosis.	 	0.000032	2	2	"NDC80,CENPH"
Pubmed	11134360	Association between spindle assembly checkpoint expression and maternal age in human oocytes.	 	0.000032	2	2	"BUB1,MAD2L1"
Pubmed	19499149	Homocysteine harasses the imprinting expression of IGF2 and H19 by demethylation of differentially methylated region between IGF2/H19 genes.	 	0.000032	2	2	"H19,IGF2"
Pubmed	19028417	Aurora-A interacts with Cyclin B1 and enhances its stability.	 	0.000032	2	2	"AURKA,CCNB1"
Pubmed	15767402	Human papillomavirus type 16 E1 E4-induced G2 arrest is associated with cytoplasmic retention of active Cdk1/cyclin B1 complexes.	 	0.000032	2	2	"CCNB1,CDC2"
Pubmed	12605037	Relaxation of imprinting of IGFII gene in juvenile nasopharyngeal angiofibromas.	 	0.000032	2	2	"H19,IGF2"
Pubmed	12595692	Proteomic screen finds pSer/pThr-binding domain localizing Plk1 to mitotic substrates.	 	0.000032	2	2	"PLK1,CDC25C"
Pubmed	16144904	Microtubule capture by CENP-E silences BubR1-dependent mitotic checkpoint signaling.	 	0.000032	2	2	"CENPE,BUB1B"
Pubmed	19098431	APC/C- and Mad2-mediated degradation of Cdc20 during spindle checkpoint activation.	 	0.000032	2	2	"MAD2L1,CDC20"
Pubmed	11992722	The involvement of a conserved family of RNA binding proteins in embryonic development and carcinogenesis.	 	0.000032	2	2	"IGF2BP1,IGF2BP3"
Pubmed	15062103	The RanGAP1-RanBP2 complex is essential for microtubule-kinetochore interactions in vivo.	 	0.000032	2	2	"NDC80,NUF2"
Pubmed	19530738	Phosphorylation of a borealin dimerization domain is required for proper chromosome segregation.	 	0.000032	2	2	"TTK,CDCA8"
Pubmed	18006818	Examination of IGF2 and H19 loss of imprinting in bladder cancer.	 	0.000032	2	2	"H19,IGF2"
Pubmed	19025652	A functional Notch-survivin gene signature in basal breast cancer.	 	0.000032	2	2	"BIRC5,NOTCH1"
Pubmed	11283617	Polo kinase and Asp are needed to promote the mitotic organizing activity of centrosomes.	 	0.000032	2	2	"ASPM,PLK1"
Pubmed	18691855	"Mitotic checkpoint genes, hsMAD2 and BubR1, in oesophageal squamous cancer cells and their association with 5-fluorouracil and cisplatin-based radiochemotherapy."	 	0.000032	2	2	"BUB1B,MAD2L1"
Pubmed	11779217	Cyclin b1 promoter activity and functional cdk1 complex formation in G1 phase of human breast cancer cells.	 	0.000032	2	2	"CCNB1,CDC2"
Pubmed	2570636	Isolation of a human cyclin cDNA: evidence for cyclin mRNA and protein regulation in the cell cycle and for interaction with p34cdc2.	 	0.000032	2	2	"CCNB1,CDC2"
Pubmed	17218258	"PICH, a centromere-associated SNF2 family ATPase, is regulated by Plk1 and required for the spindle checkpoint."	 	0.000032	2	2	"ERCC6L,PLK1"
Pubmed	15239953	Timing and checkpoints in the regulation of mitotic progression.	 	0.000032	2	2	"NDC80,NUF2"
Pubmed	17488335	Condensin mutations and abnormal chromosomal structures in pyothorax-associated lymphoma.	 	0.000032	2	2	"SMC4,SMC2"
Pubmed	19424574	"Overexpression of the receptor for hyaluronan-mediated motility, correlates with expression of microtubule-associated protein in human oral squamous cell carcinomas."	 	0.000032	2	2	"HMMR,TPX2"
Pubmed	15548592	Hec1 and nuf2 are core components of the kinetochore outer plate essential for organizing microtubule attachment sites.	 	0.000032	2	2	"NDC80,NUF2"
Pubmed	12447691	Cooperative phosphorylation including the activity of polo-like kinase 1 regulates the subcellular localization of cyclin B1.	 	0.000032	2	2	"CCNB1,PLK1"
Pubmed	18321990	Aurora A regulates the activity of HURP by controlling the accessibility of its microtubule-binding domain.	 	0.000032	2	2	"DLGAP5,AURKA"
Pubmed	16873548	Checkpoint kinase 1 (Chk1) is required for mitotic progression through negative regulation of polo-like kinase 1 (Plk1).	 	0.000032	2	2	"CHEK1,PLK1"
Pubmed	16629900	Regulation of mitotic function of Chk1 through phosphorylation at novel sites by cyclin-dependent kinase 1 (Cdk1).	 	0.000032	2	2	"CHEK1,CDC2"
Pubmed	16541107	RNA-binding IMPs promote cell adhesion and invadopodia formation.	 	0.000032	2	2	"IGF2BP1,IGF2BP3"
Pubmed	7851898	"Chromosomal localization of the genes encoding the kinetochore proteins CENPE and CENPF to human chromosomes 4q24-->q25 and 1q32-->q41, respectively, by fluorescence in situ hybridization."	 	0.000032	2	2	"CENPE,CENPF"
Pubmed	17956945	Depletion of topoisomerase IIalpha leads to shortening of the metaphase interkinetochore distance and abnormal persistence of PICH-coated anaphase threads.	 	0.000032	2	2	"TOP2A,ERCC6L"
Pubmed	16427043	Borealin/Dasra B is a cell cycle-regulated chromosomal passenger protein and its nuclear accumulation is linked to poor prognosis for human gastric cancer.	 	0.000032	2	2	"BIRC5,CDCA8"
Pubmed	16533053	Modulation of cell-cycle regulatory signaling network by 2-methoxyestradiol in prostate cancer cells is mediated through multiple signal transduction pathways.	 	0.000032	2	2	"WEE1,CDC2"
Pubmed	12525641	Depletion of Wee-1 kinase is necessary for both human immunodeficiency virus type 1 Vpr- and gamma irradiation-induced apoptosis.	 	0.000032	2	2	"WEE1,CDC2"
Pubmed	11976684	Emi1 is required for cytostatic factor arrest in vertebrate eggs.	 	0.000032	2	2	"FBXO5,CDC20"
Pubmed	8119945	Activation of p34cdc2 protein kinase by microinjection of human cdc25C into mammalian cells. Requirement for prior phosphorylation of cdc25C by p34cdc2 on sites phosphorylated at mitosis.	 	0.000032	2	2	"CDC25C,CDC2"
Pubmed	12186947	A novel chk1-dependent G1/M checkpoint in fission yeast.	 	0.000032	2	2	"WEE1,CDC2"
Pubmed	18383837	"Overexpression of the mitotic spindle assembly checkpoint genes hBUB1, hBUBR1 and hMAD2 in thyroid carcinomas with aggressive nature."	 	0.000032	2	2	"BUB1,MAD2L1"
Pubmed	10395539	Translocation of cyclin B1 to the nucleus at prophase requires a phosphorylation-dependent nuclear import signal.	 	0.000032	2	2	"CCNB1,CDC2"
Pubmed	15616196	"Ablation of PRC1 by small interfering RNA demonstrates that cytokinetic abscission requires a central spindle bundle in mammalian cells, whereas completion of furrowing does not."	 	0.000032	2	2	"ANLN,PRC1"
Pubmed	14645578	Mechanisms governing maintenance of Cdk1/cyclin B1 kinase activity in cells infected with human cytomegalovirus.	 	0.000032	2	2	"CCNB1,CDC2"
Pubmed	14667408	CENP-A phosphorylation by Aurora-A in prophase is required for enrichment of Aurora-B at inner centromeres and for kinetochore function.	 	0.000032	2	2	"CENPA,AURKA"
Pubmed	9521327	Mutations of mitotic checkpoint genes in human cancers.	 	0.000032	2	2	"BUB1B,BUB1"
Pubmed	11897663	Plk1 promotes nuclear translocation of human Cdc25C during prophase.	 	0.000032	2	2	"PLK1,CDC25C"
Pubmed	15723797	Human Bub1 defines the persistent cohesion site along the mitotic chromosome by affecting Shugoshin localization.	 	0.000032	2	2	"BUB1,SGOL1"
Pubmed	17533373	Cyclin B2 suppresses mitotic failure and DNA re-replication in human somatic cells knocked down for both cyclins B1 and B2.	 	0.000032	2	2	"CCNB1,CCNB2"
Pubmed	15705883	Receptor for hyaluronan-mediated motility correlates with centrosome abnormalities in multiple myeloma and maintains mitotic integrity.	 	0.000032	2	2	"HMMR,TPX2"
Pubmed	17445807	Raloxifene increases proliferation of human endothelial cells in association with increased gene expression of cyclins A and B1.	 	0.000032	2	2	"CCNB1,CCNA2"
Pubmed	15199097	Molecular interactions of Polo-like-kinase 1 with the mitotic kinesin-like protein CHO1/MKLP-1.	 	0.000032	2	2	"KIF23,PLK1"
Pubmed	18245780	Different mechanisms cause imprinting defects at the IGF2/H19 locus in Beckwith-Wiedemann syndrome and Wilms' tumour.	 	0.000032	2	2	"H19,IGF2"
Pubmed	16378098	Complex formation of Plk1 and INCENP required for metaphase-anaphase transition.	 	0.000032	2	2	"INCENP,PLK1"
Pubmed	14580337	Structural basis of Aurora-A activation by TPX2 at the mitotic spindle.	 	0.000032	2	2	"TPX2,AURKA"
Pubmed	18298903	Expression of PLK1 and survivin in non-Hodgkin's lymphoma treated with CHOP.	 	0.000032	2	2	"BIRC5,PLK1"
Pubmed	15987997	Phosphorylation and stabilization of HURP by Aurora-A: implication of HURP as a transforming target of Aurora-A.	 	0.000032	2	2	"DLGAP5,AURKA"
Pubmed	16807237	DNA damage-induced down-regulation of human Cdc25C and Cdc2 is mediated by cooperation between p53 and maintenance DNA (cytosine-5) methyltransferase 1.	 	0.000032	2	2	"CDC25C,CDC2"
Pubmed	8524869	Human immunodeficiency virus 1 envelope-initiated G2-phase programmed cell death.	 	0.000032	2	2	"CCNB1,CDC2"
Pubmed	12077309	Activation of Cdc2/cyclin B and inhibition of centrosome amplification in cells depleted of Plk1 by siRNA.	 	0.000032	2	2	"PLK1,CDC2"
Pubmed	16497171	A new Mad2-interacting domain of Cdc20 is critical for the function of Mad2-Cdc20 complex in the spindle assembly checkpoint.	 	0.000032	2	2	"MAD2L1,CDC20"
Pubmed	12177045	Human TPX2 is required for targeting Aurora-A kinase to the spindle.	 	0.000032	2	2	"TPX2,AURKA"
Pubmed	11136247	"Processive DNA helicase activity of the minichromosome maintenance proteins 4, 6, and 7 complex requires forked DNA structures."	 	0.000032	2	2	"MCM4,MCM6"
Pubmed	15604152	Human Bub1 protects centromeric sister-chromatid cohesion through Shugoshin during mitosis.	 	0.000032	2	2	"BUB1,SGOL1"
Pubmed	12742823	Upregulation of Cdc2 and cyclin A during apoptosis of endothelial cells induced by cleaved high-molecular-weight kininogen.	 	0.000032	2	2	"CCNA2,CDC2"
Pubmed	19066168	Epigenetic mutations of the imprinted IGF2-H19 domain in Silver-Russell syndrome (SRS): results from a large cohort of patients with SRS and SRS-like phenotypes.	 	0.000032	2	2	"H19,IGF2"
Pubmed	16648550	Molecular alterations after Polo-like kinase 1 mRNA suppression versus pharmacologic inhibition in cancer cells.	 	0.000032	2	2	"PLK1,CDC25C"
Pubmed	18541701	Mps1 kinase activity restrains anaphase during an unperturbed mitosis and targets Mad2 to kinetochores.	 	0.000032	2	2	"MAD2L1,TTK"
Pubmed	19412433	Galectin 1 proangiogenic and promigratory effects in the Hs683 oligodendroglioma model are partly mediated through the control of BEX2 expression.	 	0.000032	2	2	"BEX2,LGALS1"
Pubmed	11242082	Polo-like kinase 1 phosphorylates cyclin B1 and targets it to the nucleus during prophase.	 	0.000032	2	2	"CCNB1,PLK1"
Pubmed	17102638	Ectopic expression of Plk1 leads to activation of the spindle checkpoint.	 	0.000032	2	2	"CHEK1,PLK1"
Pubmed	11202906	"The human polo-like kinase, PLK, regulates cdc2/cyclin B through phosphorylation and activation of the cdc25C phosphatase."	 	0.000032	2	2	"PLK1,CDC25C"
Pubmed	14607335	p55CDC/hCDC20 mutant induces mitotic catastrophe by inhibiting the MAD2-dependent spindle checkpoint activity in tumor cells.	 	0.000032	2	2	"MAD2L1,CDC20"
Pubmed	18159214	IGF2/H19 hypomethylation in Silver-Russell syndrome and isolated hemihypoplasia.	 	0.000032	2	2	"H19,IGF2"
Pubmed	15796717	Recruitment of MKLP1 to the spindle midzone/midbody by INCENP is essential for midbody formation and completion of cytokinesis in human cells.	 	0.000032	2	2	"INCENP,KIF23"
Pubmed	8402895	"Functional analysis of the P box, a domain in cyclin B required for the activation of Cdc25."	 	0.000032	2	2	"CCNB1,CDC25C"
Pubmed	15558010	Autonomous regulation of the anaphase-promoting complex couples mitosis to S-phase entry.	 	0.000032	2	2	"GMNN,CCNA2"
Pubmed	8432534	Localization of human cell cycle regulatory genes CDC25C to 5q31 and WEE1 to 11p15.3-11p15.1 by fluorescence in situ hybridization.	 	0.000032	2	2	"WEE1,CDC25C"
Pubmed	18022367	The Mad2 conformational dimer: structure and implications for the spindle assembly checkpoint.	 	0.000032	2	2	"MAD2L1,CDC20"
Pubmed	18331714	"sSgo1, a major splice variant of Sgo1, functions in centriole cohesion where it is regulated by Plk1."	 	0.000032	2	2	"PLK1,SGOL1"
Pubmed	19015317	"Phosphorylation sites in BubR1 that regulate kinetochore attachment, tension, and mitotic exit."	 	0.000032	2	2	"BUB1B,TTK"
Pubmed	10377410	Cdc20 associates with the kinase aurora2/Aik.	 	0.000032	2	2	"AURKA,CDC20"
Pubmed	10700282	Structure of the Mad2 spindle assembly checkpoint protein and its interaction with Cdc20.	 	0.000032	2	2	"MAD2L1,CDC20"
Pubmed	8589713	"Mutations in GPC3, a glypican gene, cause the Simpson-Golabi-Behmel overgrowth syndrome."	 	0.000032	2	2	"GPC3,IGF2"
Pubmed	10656688	Cell cycle regulated expression and phosphorylation of hpttg proto-oncogene product.	 	0.000032	2	2	"PTTG1,CDC2"
Pubmed	9914370	The hBUB1 and hBUBR1 kinases sequentially assemble onto kinetochores during prophase with hBUBR1 concentrating at the kinetochore plates in mitosis.	 	0.000032	2	2	"BUB1B,BUB1"
Pubmed	8423786	Sequences within the conserved cyclin box of human cyclin A are sufficient for binding to and activation of cdc2 kinase.	 	0.000032	2	2	"CCNA2,CDC2"
Pubmed	16927022	Influence of chk1 and plk1 silencing on radiation- or cisplatin-induced cytotoxicity in human malignant cells.	 	0.000032	2	2	"CHEK1,PLK1"
Pubmed	14532005	The molecular basis for phosphodependent substrate targeting and regulation of Plks by the Polo-box domain.	 	0.000032	2	2	"PLK1,CDC25C"
Pubmed	17376779	Polo-like kinase 1 facilitates chromosome alignment during prometaphase through BubR1.	 	0.000032	2	2	"BUB1B,PLK1"
Pubmed	16603642	Frequent IGF2/H19 domain epigenetic alterations and elevated IGF2 expression in epithelial ovarian cancer.	 	0.000032	2	2	"H19,IGF2"
Pubmed	19148505	Expression of TPX2 in salivary gland carcinomas.	 	0.000032	2	2	"HMMR,TPX2"
Pubmed	17914111	Transforming acidic coiled-coil 3 and Aurora-A interact in human thyrocytes and their expression is deregulated in thyroid cancer tissues.	 	0.000032	2	2	"TACC3,AURKA"
Pubmed	17639080	Bipartite stimulatory action of the Hop2-Mnd1 complex on the Rad51 recombinase.	 	0.000032	2	2	"MND1,RAD51"
Pubmed	15502821	A conserved Mis12 centromere complex is linked to heterochromatic HP1 and outer kinetochore protein Zwint-1.	 	0.000038	3	12	"NDC80,CASC5,CENPH"
Pubmed	10552927	The human family of Deafness/Dystonia peptide (DDP) related mitochondrial import proteins.	 	0.000038	3	12	"TIMM8A,TIMM13,TIMM10"
Pubmed	19064565	Common single-nucleotide polymorphisms in DNA double-strand break repair genes and breast cancer risk.	 	0.000049	3	13	"CHEK1,RAD51,BARD1"
Pubmed	10611480	The mitochondrial TIM22 preprotein translocase is highly conserved throughout the eukaryotic kingdom.	 	0.000062	3	14	"TIMM8A,TIMM13,TIMM10"
Pubmed	11337467	Identification and characterization of the potential promoter regions of 1031 kinds of human genes.	 	0.000069	4	39	"RAD51,CENPE,HMGN2,CDC25C"
Pubmed	10436018	The Cdc6 nucleotide-binding site regulates its activity in DNA replication in human cells.	 	0.000077	3	15	"ORC6L,MCM4,MCM6"
Pubmed	16236267	Proteomic analysis of SUMO4 substrates in HEK293 cells under serum starvation-induced stress.	 	0.000078	5	77	"PPA1,TOP2A,IMPDH2,LMNB1,RPSA"
Pubmed	15013707	"Differential expression of the MAD2, BUB1 and HSP27 genes in Barrett's oesophagus-their association with aneuploidy and neoplastic progression."	 	0.000095	2	3	"BUB1,MAD2L1"
Pubmed	11389834	Emi1 is a mitotic regulator that interacts with Cdc20 and inhibits the anaphase promoting complex.	 	0.000095	2	3	"FBXO5,CDC20"
Pubmed	18820127	90-kDa heat shock protein inhibition abrogates the topoisomerase I poison-induced G2/M checkpoint in p53-null tumor cells by depleting Chk1 and Wee1.	 	0.000095	2	3	"CHEK1,WEE1"
Pubmed	9515786	T-loop deletion of CDC2 from breast cancer tissues eliminates binding to cyclin B1 and cyclin-dependent kinase inhibitor p21.	 	0.000095	2	3	"CCNB1,CDC2"
Pubmed	17087938	A molecular signature to discriminate dysplastic nodules from early hepatocellular carcinoma in HCV cirrhosis.	 	0.000095	2	3	"GPC3,BIRC5"
Pubmed	15175024	"Keratinocyte G2/M growth arrest by 1,25-dihydroxyvitamin D3 is caused by Cdc2 phosphorylation through Wee1 and Myt1 regulation."	 	0.000095	2	3	"WEE1,CDC2"
Pubmed	17716975	ATR pathway is the primary pathway for activating G2/M checkpoint induction after re-replication.	 	0.000095	2	3	"CHEK1,GMNN"
Pubmed	18547097	"Characterization of the tetratricopeptide-containing domain of BUB1, BUBR1, and PP5 proves that domain amphiphilicity over amino acid sequence specificity governs protein adsorption and interfacial activity."	 	0.000095	2	3	"BUB1B,BUB1"
Pubmed	7876309	Cyclin B interaction with microtubule-associated protein 4 (MAP4) targets p34cdc2 kinase to microtubules and is a potential regulator of M-phase microtubule dynamics.	 	0.000095	2	3	"CCNB1,CDC2"
Pubmed	18593928	Molecular dependence of estrogen receptor-negative breast cancer on a notch-survivin signaling axis.	 	0.000095	2	3	"BIRC5,NOTCH1"
Pubmed	18243099	Mps1 phosphorylates Borealin to control Aurora B activity and chromosome alignment.	 	0.000095	2	3	"TTK,CDCA8"
Pubmed	19553660	PinX1 is a novel microtubule-binding protein essential for accurate chromosome segregation.	 	0.000095	2	3	"CENPE,NDC80"
Pubmed	14561775	The spindle checkpoint requires cyclin-dependent kinase activity.	 	0.000095	2	3	"MAD2L1,CDC20"
Pubmed	9733650	A model of Cdc25 phosphatase catalytic domain and Cdk-interaction surface based on the presence of a rhodanese homology domain.	 	0.000095	2	3	"CDC25C,CDC2"
Pubmed	18712773	"Perturbation of the chromosomal binding of RCC1, Mad2 and survivin causes spindle assembly defects and mitotic catastrophe."	 	0.000095	2	3	"MAD2L1,BIRC5"
Pubmed	15215233	Regulation of activation-induced Fas (CD95/Apo-1) ligand expression in T cells by the cyclin B1/Cdk1 complex.	 	0.000095	2	3	"CCNB1,CDC2"
Pubmed	14610074	Aurora-B phosphorylation in vitro identifies a residue of survivin that is essential for its localization and binding to inner centromere protein (INCENP) in vivo.	 	0.000095	2	3	"INCENP,BIRC5"
Pubmed	8127873	KAP: a dual specificity phosphatase that interacts with cyclin-dependent kinases.	 	0.000095	2	3	"CDKN3,CDC2"
Pubmed	1386342	"Assignment of two human cell cycle genes, CDC25C and CCNB1, to 5q31 and 5q12, respectively."	 	0.000095	2	3	"CCNB1,CDC25C"
Pubmed	19351716	Plk1 and Aurora A regulate the depolymerase activity and the cellular localization of Kif2a.	 	0.000095	2	3	"AURKA,PLK1"
Pubmed	15790566	Cdk5 activator-binding protein C53 regulates apoptosis induced by genotoxic stress via modulating the G2/M DNA damage checkpoint.	 	0.000095	2	3	"CCNB1,CDC2"
Pubmed	16439210	The evi5 oncogene regulates cyclin accumulation by stabilizing the anaphase-promoting complex inhibitor emi1.	 	0.000095	2	3	"FBXO5,PLK1"
Pubmed	16291752	Molecular analysis of survivin isoforms: evidence that alternatively spliced variants do not play a role in mitosis.	 	0.000095	2	3	"BIRC5,CDCA8"
Pubmed	18615013	Polo-like kinase-1 is activated by aurora A to promote checkpoint recovery.	 	0.000095	2	3	"AURKA,PLK1"
Pubmed	9665850	Crystal structure of a human embryonic haemoglobin: the carbonmonoxy form of gower II (alpha2 epsilon2) haemoglobin at 2.9 A resolution.	 	0.000095	2	3	"HBA2,HBE1"
Pubmed	11707408	"Mad2 binding to Mad1 and Cdc20, rather than oligomerization, is required for the spindle checkpoint."	 	0.000095	2	3	"MAD2L1,CDC20"
Pubmed	10924145	On the concentrations of cyclins and cyclin-dependent kinases in extracts of cultured human cells.	 	0.000095	2	3	"CCNA2,CDC2"
Pubmed	15260989	The chromosomal passenger complex is required for chromatin-induced microtubule stabilization and spindle assembly.	 	0.000095	2	3	"BIRC5,CDCA8"
Pubmed	15145941	Fbx7 functions in the SCF complex regulating Cdk1-cyclin B-phosphorylated hepatoma up-regulated protein (HURP) proteolysis by a proline-rich region.	 	0.000095	2	3	"DLGAP5,CDC2"
Pubmed	17636382	New alternative phosphorylation sites on the cyclin dependent kinase 1/cyclin a complex in p53-deficient human cells treated with etoposide: possible association with etoposide-induced apoptosis.	 	0.000095	2	3	"CCNA2,CDC2"
Pubmed	18708766	"Aurora A, Aurora B and survivin are novel targets of transcriptional regulation by histone deacetylase inhibitors in non-small cell lung cancer."	 	0.000095	2	3	"AURKA,BIRC5"
Pubmed	10502411	Biochemical characterization of pKi67 with the identification of a mitotic-specific form associated with hyperphosphorylation and altered DNA binding.	 	0.000095	2	3	"MKI67,CDC2"
Pubmed	9141461	Cdc25 protein phosphatases in cell proliferation.	 	0.000095	2	3	"CDC25C,CDC2"
Pubmed	18490441	Phosphorylation of threonine 61 by cyclin a/Cdk1 triggers degradation of stem-loop binding protein at the end of S phase.	 	0.000095	2	3	"CCNA2,CDC2"
Pubmed	8440392	Dephosphorylation of human p34cdc2 kinase on both Thr-14 and Tyr-15 by human cdc25B phosphatase.	 	0.000095	2	3	"CDC25C,CDC2"
Pubmed	17322402	Shugoshin enables tension-generating attachment of kinetochores by loading Aurora to centromeres.	 	0.000095	2	3	"INCENP,SGOL1"
Pubmed	17651496	Co-localization of CENP-C and CENP-H to discontinuous domains of CENP-A chromatin at human neocentromeres.	 	0.000095	2	3	"CENPA,CENPH"
Pubmed	8034666	Identification of nuclear beta II protein kinase C as a mitotic lamin kinase.	 	0.000095	2	3	"LMNB1,CDC2"
Pubmed	9305914	"A DNA helicase activity is associated with an MCM4, -6, and -7 protein complex."	 	0.000095	2	3	"MCM4,MCM6"
Pubmed	16407259	Cell cycle-dependent phosphorylation of the RUNX2 transcription factor by cdc2 regulates endothelial cell proliferation.	 	0.000095	2	3	"CCNB1,CDC2"
Pubmed	12429910	Identification of promoter elements responsible for transcriptional inhibition of polo-like kinase 1 and topoisomerase IIalpha genes by p21(WAF1/CIP1/SDI1).	 	0.000095	2	3	"TOP2A,PLK1"
Pubmed	16519687	Site-specific phosphorylation of MCM4 during the cell cycle in mammalian cells.	 	0.000095	2	3	"MCM4,CDC2"
Pubmed	11875042	Human deafness dystonia syndrome is caused by a defect in assembly of the DDP1/TIMM8a-TIMM13 complex.	 	0.000095	2	3	"TIMM8A,TIMM13"
Pubmed	17359284	Nuclear cyclin B1 in human breast carcinoma as a potent prognostic factor.	 	0.000095	2	3	"CCNB1,PLK1"
Pubmed	17419986	Timing is everything: regulation of Cdk1 and aneuploidy.	 	0.000095	2	3	"CDC25C,CDC2"
Pubmed	15449937	Crystal structures of HbA2 and HbE and modeling of hemoglobin delta 4: interpretation of the thermal stability and the antisickling effect of HbA2 and identification of the ferrocyanide binding site in Hb.	 	0.000095	2	3	"HBA2,HBE1"
Pubmed	16753148	Polo-like kinase 1 regulates mitotic arrest after UV irradiation through dephosphorylation of p53 and inducing p53 degradation.	 	0.000095	2	3	"PLK1,CDC25C"
Pubmed	15190214	Physical and functional interactions between mitotic kinases during polyploidization and megakaryocytic differentiation.	 	0.000095	2	3	"BUB1B,AURKA"
Pubmed	19223331	HMGB1 and HMGB2 proteins up-regulate cellular expression of human topoisomerase IIalpha.	 	0.000095	2	3	"TOP2A,HMGB2"
Pubmed	15355996	Targeted knockdown of the RNA-binding protein CRD-BP promotes cell proliferation via an insulin-like growth factor II-dependent pathway in human K562 leukemia cells.	 	0.000095	2	3	"IGF2BP1,IGF2"
Pubmed	7769006	Mutation of the predicted p34cdc2 phosphorylation sites in NuMA impair the assembly of the mitotic spindle and block mitosis.	 	0.000095	2	3	"CCNB1,CDC2"
Pubmed	15769738	CRD-BP/IMP1 expression characterizes cord blood CD34+ stem cells and affects c-myc and IGF-II expression in MCF-7 cancer cells.	 	0.000095	2	3	"IGF2BP1,IGF2"
Pubmed	11988738	E2F-dependent accumulation of hEmi1 regulates S phase entry by inhibiting APC(Cdh1).	 	0.000095	2	3	"FBXO5,CDC20"
Pubmed	16142332	2-Chloroethyl-3-sarcosinamide-1-nitrosourea (SarCNU) exhibits p53-dependent and -independent antiproliferative activity in human nasopharyngeal carcinoma cells in vitro and in vivo.	 	0.000095	2	3	"CCNB1,CDC2"
Pubmed	16790497	"Cep55, a microtubule-bundling protein, associates with centralspindlin to control the midbody integrity and cell abscission during cytokinesis."	 	0.000095	2	3	"KIF23,CEP55"
Pubmed	16244668	The Polo kinase Plk4 functions in centriole duplication.	 	0.000095	2	3	"SASS6,PLK4"
Pubmed	10958694	"A human condensin complex containing hCAP-C-hCAP-E and CNAP1, a homolog of Xenopus XCAP-D2, colocalizes with phosphorylated histone H3 during the early stage of mitotic chromosome condensation."	 	0.000095	2	3	"SMC4,SMC2"
Pubmed	19139432	Gene expression profiling reveals a new classification of adrenocortical tumors and identifies molecular predictors of malignancy and survival.	 	0.000095	2	3	"DLGAP5,BUB1B"
Pubmed	18566290	Bora and the kinase Aurora a cooperatively activate the kinase Plk1 and control mitotic entry.	 	0.000095	2	3	"AURKA,PLK1"
Pubmed	15674323	The CHFR mitotic checkpoint protein delays cell cycle progression by excluding Cyclin B1 from the nucleus.	 	0.000095	2	3	"CCNA2,CDC2"
Pubmed	15678101	Plk1 docking to GRASP65 phosphorylated by Cdk1 suggests a mechanism for Golgi checkpoint signalling.	 	0.000095	2	3	"PLK1,CDC2"
Pubmed	18635963	Cyclin A-CDK activity during G1 phase impairs MCM chromatin loading and inhibits DNA synthesis in mammalian cells.	 	0.000095	2	3	"CCNA2,CDC2"
Pubmed	15181148	p21-Mediated nuclear retention of cyclin B1-Cdk1 in response to genotoxic stress.	 	0.000095	2	3	"CCNB1,CDC2"
Pubmed	9235942	Phosphorylation by p34cdc2 protein kinase regulates binding of the kinesin-related motor HsEg5 to the dynactin subunit p150.	 	0.000095	2	3	"KIF11,CDC2"
Pubmed	16629645	Novel markers of cell kinetics to evaluate progression from cirrhosis to hepatocellular carcinoma.	 	0.000095	2	3	"GMNN,MKI67"
Pubmed	11444800	Hamartin and tuberin interaction with the G2/M cyclin-dependent kinase CDK1 and its regulatory cyclins A and B.	 	0.000095	2	3	"CCNB1,CDC2"
Pubmed	8084605	p56/p53lyn tyrosine kinase activation in mammalian cells treated with mitomycin C.	 	0.000095	2	3	"WEE1,CDC2"
Pubmed	17495531	Cyclin B and cyclin A confer different substrate recognition properties on CDK2.	 	0.000095	2	3	"CCNB1,CCNA2"
Pubmed	19513555	Aberrant epigenetic modifications in the CTCF binding domain of the IGF2/H19 gene in prostate cancer compared with benign prostate hyperplasia.	 	0.000095	2	3	"H19,IGF2"
Pubmed	15654331	FoxM1 is required for execution of the mitotic programme and chromosome stability.	 	0.000095	2	3	"CENPF,CCNB1"
Pubmed	19487276	Aurora-A and hBora join the game of Polo.	 	0.000095	2	3	"AURKA,PLK1"
Pubmed	10362260	Association with Cdc2 and inhibition of Cdc2/Cyclin B1 kinase activity by the p53-regulated protein Gadd45.	 	0.000095	2	3	"CCNB1,CDC2"
Pubmed	9736712	Mad2 transiently associates with an APC/p55Cdc complex during mitosis.	 	0.000095	2	3	"MAD2L1,CDC20"
Pubmed	17805549	"Survivin, p53, and Ki-67 as predictors of histopathologic response in locally advanced rectal cancer treated with preoperative chemoradiotherapy."	 	0.000095	2	3	"BIRC5,MKI67"
Pubmed	10679238	Human p55(CDC)/Cdc20 associates with cyclin A and is phosphorylated by the cyclin A-Cdk2 complex.	 	0.000095	2	3	"CCNA2,CDC20"
Pubmed	16880739	Cdk1/cyclin B-mediated phosphorylation stabilizes SREBP1 during mitosis.	 	0.000095	2	3	"CCNB1,CDC2"
Pubmed	15016823	The human nuclear SRcyp is a cell cycle-regulated cyclophilin.	 	0.000095	2	3	"CCNB1,CDC2"
Pubmed	15694304	The Mad1/Mad2 complex as a template for Mad2 activation in the spindle assembly checkpoint.	 	0.000095	2	3	"MAD2L1,CDC20"
Pubmed	18337751	cdc2-cyclin B regulates eEF2 kinase activity in a cell cycle- and amino acid-dependent manner.	 	0.000095	2	3	"CCNB1,CDC2"
Pubmed	17466630	Phosphorylation of caspase-9 by CDK1/cyclin B1 protects mitotic cells against apoptosis.	 	0.000095	2	3	"CCNB1,CDC2"
Pubmed	12925766	"Exploring the functional interactions between Aurora B, INCENP, and survivin in mitosis."	 	0.000095	2	3	"INCENP,BIRC5"
Pubmed	18062778	"Plk3 phosphorylates topoisomerase IIalpha at Thr(1342), a site that is not recognized by Plk1."	 	0.000095	2	3	"TOP2A,PLK1"
Pubmed	12468530	Tip60 acetyltransferase activity is controlled by phosphorylation.	 	0.000095	2	3	"CCNB1,CDC2"
Pubmed	17881355	The mitotic regulator Survivin binds as a monomer to its functional interactor Borealin.	 	0.000095	2	3	"BIRC5,CDCA8"
Pubmed	10373560	Overproduction of human Myt1 kinase induces a G2 cell cycle delay by interfering with the intracellular trafficking of Cdc2-cyclin B1 complexes.	 	0.000095	2	3	"CCNB1,CDC2"
Pubmed	17296566	Expression of the RNA-binding protein VICKZ in normal hematopoietic tissues and neoplasms.	 	0.000095	2	3	"IGF2BP1,IGF2BP3"
Pubmed	9585407	Nuclear localization of cyclin B1 controls mitotic entry after DNA damage.	 	0.000095	2	3	"CDC25C,CDC2"
Pubmed	19525938	Chromosome congression in the absence of kinetochore fibres.	 	0.000095	2	3	"CENPE,NUF2"
Pubmed	12839990	A direct role for GRASP65 as a mitotically regulated Golgi stacking factor.	 	0.000095	2	3	"CCNB1,CDC2"
Pubmed	8697818	Chromosomal mapping of the human genes CKS1 to 8q21 and CKS2 to 9q22.	 	0.000095	2	3	"CKS1B,CKS2"
Pubmed	16237118	"Cdc2/cyclin B1 interacts with and modulates inositol 1,4,5-trisphosphate receptor (type 1) functions."	 	0.000095	2	3	"CCNB1,CDC2"
Pubmed	10564259	Mechanisms of G2 arrest in response to overexpression of p53.	 	0.000095	2	3	"WEE1,CDC2"
Pubmed	9990288	Ribonucleotide reductase R2 protein is phosphorylated at serine-20 by P34cdc2 kinase.	 	0.000095	2	3	"RRM2,CDC2"
Pubmed	12070128	Human securin proteolysis is controlled by the spindle checkpoint and reveals when the APC/C switches from activation by Cdc20 to Cdh1.	 	0.000114	3	17	"PTTG1,UBE2C,CDC20"
Pubmed	16916647	Substrate and functional diversity of lysine acetylation revealed by a proteomics survey.	 	0.000125	7	194	"HIST1H2BK,HIST1H2BH,HIST1H2BM,HIST1H2BL,HIST1H2BN,HIST1H2BJ,TMSB10"
Pubmed	12408966	The human and mouse replication-dependent histone genes.	 	0.000129	6	136	"HIST1H2BK,HIST1H2BH,HIST1H2BM,HIST1H2BL,HIST1H2BN,HIST1H2BJ"
Pubmed	12045100	DNA replication in eukaryotic cells.	 	0.000136	3	18	"ORC6L,MCM4,MCM6"
Pubmed	15142377	Partner molecules of accessory protein Vpr of the human immunodeficiency virus type 1.	 	0.000161	3	19	"KPNA2,WEE1,CDC2"
Pubmed	15778465	"Targeted proteomic analysis of 14-3-3 sigma, a p53 effector commonly silenced in cancer."	 	0.000171	5	91	"ARHGAP11A,SHCBP1,WEE1,KIF23,RALGPS2"
Pubmed	12791267	Prophase destruction of Emi1 by the SCF(betaTrCP/Slimb) ubiquitin ligase activates the anaphase promoting complex to allow progression beyond prometaphase.	 	0.000185	4	50	"FBXO5,CCNB1,CDC20,CDC2"
Pubmed	17199038	"Priming of centromere for CENP-A recruitment by human hMis18alpha, hMis18beta, and M18BP1."	 	0.000189	2	4	"C14orf106,CENPA"
Pubmed	8242750	"Cdi1, a human G1 and S phase protein phosphatase that associates with Cdk2."	 	0.000189	2	4	"CDKN3,CDC2"
Pubmed	7774928	"Assignment of the 36.5-kDa (RFC5), 37-kDa (RFC4), 38-kDa (RFC3), and 40-kDa (RFC2) subunit genes of human replication factor C to chromosome bands 12q24.2-q24.3, 3q27, 13q12.3-q13, and 7q11.23."	 	0.000189	2	4	"RFC3,RFC4"
Pubmed	11598127	Regulation of the anaphase-promoting complex by the dual specificity phosphatase human Cdc14a.	 	0.000189	2	4	"CCNB1,CDC2"
Pubmed	12456649	"Identification of a MAD2-binding protein, CMT2, and its role in mitosis."	 	0.000189	2	4	"MAD2L1,CDC20"
Pubmed	8770919	Impaired processing of brain proneurotensin and promelanin-concentrating hormone in obese fat/fat mice.	 	0.000189	2	4	"CPE,PMCH"
Pubmed	15125835	Mitotic phosphorylation of the peripheral Golgi protein Nir2 by Cdk1 provides a docking mechanism for Plk1 and affects cytokinesis completion.	 	0.000189	2	4	"PLK1,CDC2"
Pubmed	1836978	Specific activation of cdc25 tyrosine phosphatases by B-type cyclins: evidence for multiple roles of mitotic cyclins.	 	0.000189	2	4	"CCNB1,CDC25C"
Pubmed	15246873	Interaction of Doppel with the full-length laminin receptor precursor protein.	 	0.000189	2	4	"PRND,RPSA"
Pubmed	16159883	Depletion of Chk1 leads to premature activation of Cdc2-cyclin B and mitotic catastrophe.	 	0.000189	2	4	"CHEK1,CDC2"
Pubmed	11438673	Identification of an overlapping binding domain on Cdc20 for Mad2 and anaphase-promoting complex: model for spindle checkpoint regulation.	 	0.000189	2	4	"MAD2L1,CDC20"
Pubmed	19509060	Sequential phosphorylation of Nedd1 by Cdk1 and Plk1 is required for targeting of the gammaTuRC to the centrosome.	 	0.000189	2	4	"PLK1,CDC2"
Pubmed	18372919	Cyclin A/cdk2 coordinates centrosomal and nuclear mitotic events.	 	0.000189	2	4	"CCNB1,CDC2"
Pubmed	11516652	INCENP is required for proper targeting of Survivin to the centromeres and the anaphase spindle during mitosis.	 	0.000189	2	4	"INCENP,BIRC5"
Pubmed	15531913	Rottlerin sensitizes glioma cells to TRAIL-induced apoptosis by inhibition of Cdc2 and the subsequent downregulation of survivin and XIAP.	 	0.000189	2	4	"BIRC5,CDC2"
Pubmed	8524282	"Plk is an M-phase-specific protein kinase and interacts with a kinesin-like protein, CHO1/MKLP-1."	 	0.000189	2	4	"KIF23,PLK1"
Pubmed	18604514	"Loss of imprinting of IGF2 and H19, loss of heterozygosity of IGF2R and CTCF, and Helicobacter pylori infection in laryngeal squamous cell carcinoma."	 	0.000189	2	4	"H19,IGF2"
Pubmed	11470801	"Identification of a novel kinesin-related protein, KRMP1, as a target for mitotic peptidyl-prolyl isomerase Pin1."	 	0.000189	2	4	"KIF20B,CDC2"
Pubmed	17593084	The Ki67+ proliferation index correlates with increased cellular retinol-binding protein-1 and the coordinated loss of plakophilin-1 and desmoplakin during progression of cervical squamous lesions.	 	0.000189	2	4	"RBP1,MKI67"
Pubmed	11976319	Identification of Aurora kinases as RasGAP Src homology 3 domain-binding proteins.	 	0.000189	2	4	"AURKA,BIRC5"
Pubmed	15254020	"The calcium-binding aspartate/glutamate carriers, citrin and aralar1, are new substrates for the DDP1/TIMM8a-TIMM13 complex."	 	0.000189	2	4	"TIMM8A,TIMM13"
Pubmed	11283619	A role for the Adenomatous Polyposis Coli protein in chromosome segregation.	 	0.000189	2	4	"BUB1B,BUB1"
Pubmed	14657243	WRN helicase and FEN-1 form a complex upon replication arrest and together process branchmigrating DNA structures associated with the replication fork.	 	0.000189	2	4	"RFC3,FEN1"
Pubmed	15311285	Centrosome-associated Chk1 prevents premature activation of cyclin-B-Cdk1 kinase.	 	0.000189	2	4	"CHEK1,CDC2"
Pubmed	9497340	Identification of a novel cytoplasmic protein that specifically binds to nuclear localization signal motifs.	 	0.000189	2	4	"KPNA2,CENPF"
Pubmed	18317453	The checkpoint kinases Chk1 and Chk2 regulate the functional associations between hBRCA2 and Rad51 in response to DNA damage.	 	0.000189	2	4	"CHEK1,RAD51"
Pubmed	9628895	"Mammalian p55CDC mediates association of the spindle checkpoint protein Mad2 with the cyclosome/anaphase-promoting complex, and is involved in regulating anaphase onset and late mitotic events."	 	0.000189	2	4	"MAD2L1,CDC20"
Pubmed	18591255	A survivin-ran complex regulates spindle formation in tumor cells.	 	0.000189	2	4	"BIRC5,CDCA8"
Pubmed	11069302	Regulation of apoptosis at cell division by p34cdc2 phosphorylation of survivin.	 	0.000189	2	4	"BIRC5,CDC2"
Pubmed	16247472	Phosphorylation of the cytokinesis regulator ECT2 at G2/M phase stimulates association of the mitotic kinase Plk1 and accumulation of GTP-bound RhoA.	 	0.000189	2	4	"PLK1,CDC2"
Pubmed	17386261	Requirements for Cdk7 in the assembly of Cdk1/cyclin B and activation of Cdk2 revealed by chemical genetics in human cells.	 	0.000189	2	4	"CCNB1,CDC2"
Pubmed	9660858	The human homologue of Bub3 is required for kinetochore localization of Bub1 and a Mad3/Bub1-related protein kinase.	 	0.000189	2	4	"BUB1B,BUB1"
Pubmed	17242184	Artemis links ATM to G2/M checkpoint recovery via regulation of Cdk1-cyclin B.	 	0.000189	2	4	"CCNB1,CDC2"
Pubmed	19568409	Gemcitabine-based chemogene therapy for pancreatic cancer using Ad-dCK::UMK GDEPT and TS/RR siRNA strategies.	 	0.000189	2	4	"UCK2,RRM2"
Pubmed	12921532	Nuclear transit of human zipcode-binding protein IMP1.	 	0.000189	2	4	"IGF2BP1,IGF2BP3"
Pubmed	9789013	Identification of two distinct human SMC protein complexes involved in mitotic chromosome dynamics.	 	0.000189	2	4	"SMC4,SMC2"
Pubmed	16330544	"Chaperoning checkpoint kinase 1 (Chk1), an Hsp90 client, with purified chaperones."	 	0.000189	2	4	"CHEK1,CDC25C"
Pubmed	15306814	Rb inactivation promotes genomic instability by uncoupling cell cycle progression from mitotic control.	 	0.000189	2	4	"MAD2L1,CCNA2"
Pubmed	19550118	Inhibitory effect of wild-type p53 gene on excessive replication of centrosomes in leukemia cell line K562.	 	0.000189	2	4	"BUB1B,AURKA"
Pubmed	19197335	"Genetic sequence variations of BRCA1-interacting genes AURKA, BAP1, BARD1 and DHX9 in French Canadian families with high risk of breast cancer."	 	0.000189	2	4	"BARD1,AURKA"
Pubmed	11559705	Involvement of the interaction between p21 and proliferating cell nuclear antigen for the maintenance of G2/M arrest after DNA damage.	 	0.000189	2	4	"CCNB1,CDC2"
Pubmed	9001210	The human Myt1 kinase preferentially phosphorylates Cdc2 on threonine 14 and localizes to the endoplasmic reticulum and Golgi complex.	 	0.000189	2	4	"CCNB1,CDC2"
Pubmed	11804586	The Mad2 spindle checkpoint protein undergoes similar major conformational changes upon binding to either Mad1 or Cdc20.	 	0.000189	2	4	"MAD2L1,CDC20"
Pubmed	12694531	Mammalian Mcm2/4/6/7 complex forms a toroidal structure.	 	0.000189	2	4	"MCM4,MCM6"
Pubmed	16764853	EVI5 protein associates with the INCENP-aurora B kinase-survivin chromosomal passenger complex and is involved in the completion of cytokinesis.	 	0.000189	2	4	"INCENP,BIRC5"
Pubmed	12917330	Nuclease-deficient FEN-1 blocks Rad51/BRCA1-mediated repair and causes trinucleotide repeat instability.	 	0.000189	2	4	"FEN1,RAD51"
Pubmed	15214825	"Granular cell tumor: immunohistochemical assessment of inhibin-alpha, protein gene product 9.5, S100 protein, CD68, and Ki-67 proliferative index with clinical correlation."	 	0.000189	2	4	"MKI67,CD68"
Pubmed	18927283	Expression analysis of Barrett's esophagus-associated high-grade dysplasia in laser capture microdissected archival tissue.	 	0.000189	2	4	"TOP2A,S100A9"
Pubmed	16478538	Phosphorylation-facilitated sumoylation of MEF2C negatively regulates its transcriptional activity.	 	0.000189	2	4	"CCNB1,CDC2"
Pubmed	16784539	The p53-targeting human phosphatase hCdc14A interacts with the Cdk1/cyclin B complex and is differentially expressed in human cancers.	 	0.000189	2	4	"CCNB1,CDC2"
Pubmed	15671017	"Binding of HTm4 to cyclin-dependent kinase (Cdk)-associated phosphatase (KAP).Cdk2.cyclin A complex enhances the phosphatase activity of KAP, dissociates cyclin A, and facilitates KAP dephosphorylation of Cdk2."	 	0.000189	2	4	"CDKN3,CCNA2"
Pubmed	12351790	cDNA and deduced amino acid sequence of human pulmonary surfactant-associated proteolipid SPL(Phe).	 	0.000189	2	4	"NDC80,MAD2L1"
Pubmed	10852915	Farnesyl transferase inhibitors block the farnesylation of CENP-E and CENP-F and alter the association of CENP-E with the microtubules.	 	0.000189	2	4	"CENPE,CENPF"
Pubmed	19468300	Polo-like kinase 1 directs assembly of the HsCyk-4 RhoGAP/Ect2 RhoGEF complex to initiate cleavage furrow formation.	 	0.000189	2	4	"PRC1,PLK1"
Pubmed	12397081	A role for cell cycle-regulated phosphorylation in Groucho-mediated transcriptional repression.	 	0.000189	2	4	"CCNB1,CDC2"
Pubmed	19723035	Distribution of centromeric proteins and PARP-1 during mitosis and apoptosis.	 	0.000189	2	4	"CENPE,CENPF"
Pubmed	8692848	In vitro reconstitution of human replication factor C from its five subunits.	 	0.000313	2	5	"RFC3,RFC4"
Pubmed	10959836	A critical role for histone H2AX in recruitment of repair factors to nuclear foci after DNA damage.	 	0.000313	2	5	"RAD51,H2AFX"
Pubmed	12771218	"A new member of the MCM protein family encoded by the human MCM8 gene, located contrapodal to GCD10 at chromosome band 20p12.3-13."	 	0.000313	2	5	"MCM4,MCM6"
Pubmed	10051561	Studies on the interactions between human replication factor C and human proliferating cell nuclear antigen.	 	0.000313	2	5	"RFC3,RFC4"
Pubmed	8620898	Biochemical and antibacterial analysis of human wound and blister fluid.	 	0.000313	2	5	"HIST1H2BK,HIST1H2BJ"
Pubmed	7969176	Cyclin A/CDK2 binds directly to E2F-1 and inhibits the DNA-binding activity of E2F-1/DP-1 by phosphorylation.	 	0.000313	2	5	"CCNA2,CDC2"
Pubmed	17488622	GEF-H1 modulates localized RhoA activation during cytokinesis under the control of mitotic kinases.	 	0.000313	2	5	"AURKA,CDC2"
Pubmed	12860195	Antimicrobial peptides in the first line defence of human colon mucosa.	 	0.000313	2	5	"HIST1H2BK,HIST1H2BJ"
Pubmed	10748114	"Inhibition of Mcm4,6,7 helicase activity by phosphorylation with cyclin A/Cdk2."	 	0.000313	2	5	"MCM4,MCM6"
Pubmed	12485996	Activation of the E3 ligase function of the BRCA1/BARD1 complex by polyubiquitin chains.	 	0.000313	2	5	"BARD1,H2AFX"
Pubmed	9488738	Reconstitution of recombinant human replication factor C (RFC) and identification of an RFC subcomplex possessing DNA-dependent ATPase activity.	 	0.000313	2	5	"RFC3,RFC4"
Pubmed	12601350	Cyclins and cyclin-dependent kinases: comparative study of hepatocellular carcinoma versus cirrhosis.	 	0.000313	2	5	"WEE1,CCNA2"
Pubmed	10477750	Human BUBR1 is a mitotic checkpoint kinase that monitors CENP-E functions at kinetochores and binds the cyclosome/APC.	 	0.000313	2	5	"CENPE,BUB1B"
Pubmed	12686615	Human MPS1 kinase is required for mitotic arrest induced by the loss of CENP-E from kinetochores.	 	0.000313	2	5	"CENPE,TTK"
Pubmed	18692784	Cyclin and protamine as prognostic molecular marker for testicular sperm extraction in patients with azoospermia.	 	0.000313	2	5	"CCNB1,CCNB2"
Pubmed	11313979	"p15(PAF), a novel PCNA associated factor with increased expression in tumor tissues."	 	0.000313	2	5	"KIAA0101,FEN1"
Pubmed	17719540	"A bacterial effector targets Mad2L2, an APC inhibitor, to modulate host cell cycling."	 	0.000313	2	5	"FBXO5,CDC20"
Pubmed	10716937	Cyclin F regulates the nuclear localization of cyclin B1 through a cyclin-cyclin interaction.	 	0.000313	2	5	"CCNB1,CDC2"
Pubmed	17681131	Plk4-induced centriole biogenesis in human cells.	 	0.000313	2	5	"SASS6,PLK4"
Pubmed	15019208	Antimicrobial polypeptides of the human colonic epithelium.	 	0.000313	2	5	"HIST1H2BK,HIST1H2BJ"
Pubmed	18703994	Amino acid transport systems beta and A in fetal T lymphocytes in intrauterine growth restriction and with tumor necrosis factor-alpha treatment.	 	0.000313	2	5	"SLC38A1,SLC38A4"
Pubmed	8463339	G2 delay induced by nitrogen mustard in human cells affects cyclin A/cdk2 and cyclin B1/cdc2-kinase complexes differently.	 	0.000313	2	5	"CCNB1,CDC2"
Pubmed	9278511	Conservation of the Chk1 checkpoint pathway in mammals: linkage of DNA damage to Cdk regulation through Cdc25.	 	0.000313	2	5	"CHEK1,CDC25C"
Pubmed	15150265	Human SAD1 kinase is involved in UV-induced DNA damage checkpoint function.	 	0.000313	2	5	"WEE1,CDC25C"
Pubmed	19473963	Nuclear targeting of 6-phosphofructo-2-kinase (PFKFB3) increases proliferation via cyclin-dependent kinases.	 	0.000313	2	5	"CDC25C,CDC2"
Pubmed	11859126	Endotoxin-neutralizing antimicrobial proteins of the human placenta.	 	0.000313	2	5	"HIST1H2BK,HIST1H2BJ"
Pubmed	12569090	Phosphorylation of serine 1106 in the catalytic domain of topoisomerase II alpha regulates enzymatic activity and drug sensitivity.	 	0.000313	2	5	"TOP2A,CDC2"
Pubmed	9228079	"A complex consisting of human replication factor C p40, p37, and p36 subunits is a DNA-dependent ATPase and an intermediate in the assembly of the holoenzyme."	 	0.000313	2	5	"RFC3,RFC4"
Pubmed	16826239	The replication kinase Cdc7-Dbf4 promotes the interaction of the p150 subunit of chromatin assembly factor 1 with proliferating cell nuclear antigen.	 	0.000313	2	5	"DBF4,CHAF1A"
Pubmed	11331587	Patched1 interacts with cyclin B1 to regulate cell cycle progression.	 	0.000313	2	5	"CCNB1,CDC2"
Pubmed	11572977	Purification and characterization of human DNA damage checkpoint Rad complexes.	 	0.000468	2	6	"RFC3,RFC4"
Pubmed	16049158	Expression of IGF-II mRNA-binding proteins (IMPs) in gonads and testicular cancer.	 	0.000468	2	6	"IGF2BP1,IGF2BP3"
Pubmed	14718566	"TOGp, the human homolog of XMAP215/Dis1, is required for centrosome integrity, spindle pole organization, and bipolar spindle assembly."	 	0.000468	2	6	"KIF11,TPX2"
Pubmed	12815053	M phase-specific phosphorylation of BRCA2 by Polo-like kinase 1 correlates with the dissociation of the BRCA2-P/CAF complex.	 	0.000468	2	6	"RAD51,PLK1"
Pubmed	10581175	A novel human gene encoding HECT domain and RCC1-like repeats interacts with cyclins and is potentially regulated by the tumor suppressor proteins.	 	0.000468	2	6	"CCNB1,CCNA2"
Pubmed	15236977	Pairwise interactions of the six human MCM protein subunits.	 	0.000468	2	6	"MCM4,MCM6"
Pubmed	11498787	Adenosine nucleotide modulates the physical interaction between hMSH2 and BRCA1.	 	0.000468	2	6	"RAD51,BARD1"
Pubmed	14605214	Replication protein A-mediated recruitment and activation of Rad17 complexes.	 	0.000468	2	6	"RFC3,RFC4"
Pubmed	19008095	Single nucleotide polymorphisms in chromosomal instability genes and risk and clinical outcome of breast cancer: A Swedish prospective case-control study.	 	0.000468	2	6	"PTTG1,CENPF"
Pubmed	9891060	A family of insulin-like growth factor II mRNA-binding proteins represses translation in late development.	 	0.000468	2	6	"IGF2BP1,IGF2BP3"
Pubmed	17349584	Fez1/Lzts1 absence impairs Cdk1/Cdc25C interaction during mitosis and predisposes mice to cancer development.	 	0.000468	2	6	"CDC25C,CDC2"
Pubmed	9637688	The checkpoint protein MAD2 and the mitotic regulator CDC20 form a ternary complex with the anaphase-promoting complex to control anaphase initiation.	 	0.000468	2	6	"MAD2L1,CDC20"
Pubmed	9099751	In vivo interaction of human MCM heterohexameric complexes with chromatin. Possible involvement of ATP.	 	0.000468	2	6	"MCM4,MCM6"
Pubmed	10037602	Function of WW domains as phosphoserine- or phosphothreonine-binding modules.	 	0.000468	2	6	"PLK1,CDC25C"
Pubmed	18056802	Control of mitotic exit by PP2A regulation of Cdc25C and Cdk1.	 	0.000468	2	6	"CDC25C,CDC2"
Pubmed	15601260	VICKZ proteins: a multi-talented family of regulatory RNA-binding proteins.	 	0.000468	2	6	"IGF2BP1,IGF2BP3"
Pubmed	15324660	"Proteomic, functional, and domain-based analysis of in vivo 14-3-3 binding proteins involved in cytoskeletal regulation and cellular organization."	 	0.000478	7	242	"CHEK1,WEE1,KIF23,CKAP2,CTPS,MAGOHB,RALGPS2"
Pubmed	19124506	Common genetic variation in candidate genes and susceptibility to subtypes of breast cancer.	 	0.00057	5	118	"CHEK1,RAD51,BARD1,AURKA,IGF2"
Pubmed	11248027	Identification of two residues in MCM5 critical for the assembly of MCM complexes and Stat1-mediated transcription activation in response to IFN-gamma.	 	0.000653	2	7	"MCM4,MCM6"
Pubmed	10557092	The physical association and phosphorylation of Cdc25C protein phosphatase by Prk.	 	0.000653	2	7	"CHEK1,CDC25C"
Pubmed	9278512	Mitotic and G2 checkpoint control: regulation of 14-3-3 protein binding by phosphorylation of Cdc25C on serine-216.	 	0.000653	2	7	"CHEK1,CDC25C"
Pubmed	6985477	The structure and evolution of the human beta-globin gene family.	 	0.000653	2	7	"HBA2,HBE1"
Pubmed	9247342	HSP70-2 is required for CDC2 kinase activity in meiosis I of mouse spermatocytes.	 	0.000653	2	7	"CCNB1,CDC2"
Pubmed	16902406	Functional cooperation between FACT and MCM helicase facilitates initiation of chromatin DNA replication.	 	0.000653	2	7	"MCM4,MCM6"
Pubmed	11901153	"Protein kinase C-beta II Is an apoptotic lamin kinase in polyomavirus-transformed, etoposide-treated pyF111 rat fibroblasts."	 	0.000653	2	7	"LMNB1,CDC2"
Pubmed	12188893	Drug target discovery by gene expression analysis: cell cycle genes.	 	0.000653	2	7	"CDCA7,CDCA8"
Pubmed	12207017	Roles of Mcm7 and Mcm4 subunits in the DNA helicase activity of the mouse Mcm4/6/7 complex.	 	0.000653	2	7	"MCM4,MCM6"
Pubmed	10567526	Biochemical analysis of the intrinsic Mcm4-Mcm6-mcm7 DNA helicase activity.	 	0.000653	2	7	"MCM4,MCM6"
Pubmed	18084284	Unified mode of centromeric protection by shugoshin in mammalian oocytes and somatic cells.	 	0.000653	2	7	"SGOL2,SGOL1"
Pubmed	11333986	Initiation of a G2/M checkpoint after ultraviolet radiation requires p38 kinase.	 	0.000653	2	7	"CHEK1,CDC25C"
Pubmed	11278247	The RING heterodimer BRCA1-BARD1 is a ubiquitin ligase inactivated by a breast cancer-derived mutation.	 	0.000653	2	7	"BARD1,CCNB1"
Pubmed	19483681	A genome-wide association study of testicular germ cell tumor.	 	0.000653	2	7	"CENPE,UCK2"
Pubmed	8798650	Binding of human minichromosome maintenance proteins with histone H3.	 	0.000653	2	7	"MCM4,MCM6"
Pubmed	10973963	Identification of a functional domain in a GADD45-mediated G2/M checkpoint.	 	0.000653	2	7	"CCNB1,CDC2"
Pubmed	12419313	The beta2-adaptin clathrin adaptor interacts with the mitotic checkpoint kinase BubR1.	 	0.000653	2	7	"BUB1B,BUB1"
Pubmed	16385451	A scan of chromosome 10 identifies a novel locus showing strong association with late-onset Alzheimer disease.	 	0.000667	9	418	"KIF11,MRC1,KIF20B,PTPLA,CEP55,MKI67,CDC2,MASTL,RPP30"
Pubmed	16109376	The bromodomain protein Brd4 is a positive regulatory component of P-TEFb and stimulates RNA polymerase II-dependent transcription.	 	0.000853	3	33	"CCNB1,CCNA2,CDC2"
Pubmed	11927591	Autoubiquitination of the BRCA1*BARD1 RING ubiquitin ligase.	 	0.000867	2	8	"BARD1,H2AFX"
Pubmed	10884347	The C-terminal regulatory domain of p53 contains a functional docking site for cyclin A.	 	0.000867	2	8	"CCNA2,CDC2"
Pubmed	12575534	"[Morphological, cytogenetic and molecular biological characteristics of lung cancer in persons exposed for a long time to radionuclide radiation pollution in the Semipalatinsk region of Kazakhstan]"	 	0.000867	2	8	"IGF2,MKI67"
Pubmed	9436978	HIV-1 Vpr interacts with the nuclear transport pathway to promote macrophage infection.	 	0.000867	2	8	"KPNA2,LMNB1"
Pubmed	7555018	The multiple functions of hemoglobin.	 	0.000867	2	8	"HBA2,HBE1"
Pubmed	11907025	Structures of the human Rad17-replication factor C and checkpoint Rad 9-1-1 complexes visualized by glycerol spray/low voltage microscopy.	 	0.000867	2	8	"RFC3,RFC4"
Pubmed	14636569	"Regulation of BRCC, a holoenzyme complex containing BRCA1 and BRCA2, by a signalosome-like subunit and its role in DNA repair."	 	0.000867	2	8	"RAD51,BARD1"
Pubmed	10523313	Mammalian Cdc7-Dbf4 protein kinase complex is essential for initiation of DNA replication.	 	0.000867	2	8	"DBF4,ORC6L"
Pubmed	10353443	The DNA-binding subunit p140 of replication factor C is upregulated in cycling cells and associates with G1 phase cell cycle regulatory proteins.	 	0.000867	2	8	"KIT,RFC4"
Pubmed	12775724	"RLIP, an effector of the Ral GTPases, is a platform for Cdk1 to phosphorylate epsin during the switch off of endocytosis in mitosis."	 	0.000867	2	8	"CCNB1,CDC2"
Pubmed	12192049	"A Mammalian bromodomain protein, brd4, interacts with replication factor C and inhibits progression to S phase."	 	0.000867	2	8	"RFC3,RFC4"
Pubmed	8706699	"Characterization of the human small-ribosomal-subunit proteins by N-terminal and internal sequencing, and mass spectrometry."	 	0.001014	3	35	"HBA2,RPS12,RPSA"
Pubmed	16682347	"Human Scc4 is required for cohesin binding to chromatin, sister-chromatid cohesion, and mitotic progression."	 	0.001111	2	9	"DSCC1,SGOL1"
Pubmed	10384058	The genomic organization of the histone clusters on human 6p21.3.	 	0.001111	2	9	"HIST1H2BK,HIST1H2BJ"
Pubmed	18245774	DNA damage-induced ubiquitylation of RFC2 subunit of replication factor C complex.	 	0.001111	2	9	"RFC3,RFC4"
Pubmed	17363900	The human Nup107-160 nuclear pore subcomplex contributes to proper kinetochore functions.	 	0.001111	2	9	"CENPF,NUP43"
Pubmed	12419249	BRCA1 supports XIST RNA concentration on the inactive X chromosome.	 	0.001111	2	9	"BARD1,XIST"
Pubmed	9387929	The U22 host gene (UHG): chromosomal localization of UHG and distribution of U22 small nucleolar RNA.	 	0.001111	2	9	"SNORD22,SNHG1"
Pubmed	17254966	Cdk-inhibitory activity and stability of p27Kip1 are directly regulated by oncogenic tyrosine kinases.	 	0.001111	2	9	"CCNA2,CCNE2"
Pubmed	15231747	A protein interaction framework for human mRNA degradation.	 	0.001319	6	211	"DBF4,TOX4,MPP6,CHAF1A,LSM5,C15orf23"
Pubmed	8559254	A mammalian gene with introns instead of exons generating stable RNA products.	 	0.001383	2	10	"SNORD22,SNHG1"
Pubmed	16716197	Comprehensive analysis of the ICEN (Interphase Centromere Complex) components enriched in the CENP-A chromatin of human cells.	 	0.001383	2	10	"CENPK,CENPH"
Pubmed	17098733	"Mip/LIN-9 regulates the expression of B-Myb and the induction of cyclin A, cyclin B, and CDK1."	 	0.001383	2	10	"CCNB1,CDC2"
Pubmed	11125146	Inhibition of eukaryotic DNA replication by geminin binding to Cdt1.	 	0.001383	2	10	"GMNN,ORC6L"
Pubmed	822353	3' non-coding region sequences in eukaryotic messenger RNA.	 	0.001383	2	10	"HBA2,HBE1"
Pubmed	9121429	The human immunodeficiency virus transactivator Tat interacts with the RNA polymerase II holoenzyme.	 	0.001393	3	39	"RFC3,RFC4,RAD51"
Pubmed	19584272	Modification of ovarian cancer risk by BRCA1/2-interacting genes in a multicenter cohort of BRCA1/2 mutation carriers.	 	0.001684	2	11	"RAD51,BARD1"
Pubmed	9562972	"HIV-1 nuclear import: matrix protein is back on center stage, this time together with Vpr."	 	0.001684	2	11	"KPNA2,NUTF2"
Pubmed	15050687	"Proliferation inhibition of astrocytes, neurons, and non-glial cells by intracellularly expressed human immunodeficiency virus type 1 (HIV-1) Tat protein."	 	0.001684	2	11	"CCNA2,CDC2"
Pubmed	10766737	Analysis of promoter binding by the E2F and pRB families in vivo: distinct E2F proteins mediate activation and repression.	 	0.001684	2	11	"CCNA2,CDC2"
Pubmed	11551930	Plk3 functionally links DNA damage to cell cycle arrest and apoptosis at least in part via the p53 pathway.	 	0.001684	2	11	"CHEK1,CDC25C"
Pubmed	2649166	A review of the molecular genetics of the human alpha-globin gene cluster.	 	0.002014	2	12	"HBA2,HBE1"
Pubmed	8424456	"Cleavage of human and mouse cytoskeletal and sarcomeric proteins by human immunodeficiency virus type 1 protease. Actin, desmin, myosin, and tropomyosin."	 	0.002014	2	12	"MYH10,TPM2"
Pubmed	15664198	Human Asf1 regulates the flow of S phase histones during replicational stress.	 	0.002371	2	13	"CHAF1A,NASP"
Pubmed	19710015	The metastasis efficiency modifier ribosomal RNA processing 1 homolog B (RRP1B) is a chromatin-associated factor.	 	0.002695	3	49	"ERH,CDCA8,MKI67"
Pubmed	18391951	Many sequence variants affecting diversity of adult human height.	 	0.002728	5	168	"NCAPG,ITM2A,LYZ,C6orf173,ATAD5"
Pubmed	9179496	Construction and characterization of human brain cDNA libraries suitable for analysis of cDNA clones encoding relatively large proteins.	 	0.002756	2	14	"DLGAP5,ELMO1"
Pubmed	19064572	Polymorphism in the IL18 gene and epithelial ovarian cancer in non-Hispanic white women.	 	0.00287	5	170	"CHEK1,RAD51,BARD1,HELLS,IGF2"
Pubmed	12393188	"Ku antigen, an origin-specific binding protein that associates with replication proteins, is required for mammalian DNA replication."	 	0.003168	2	15	"TOP2A,PRIM1"
Pubmed	9891079	"Cyclin E associates with BAF155 and BRG1, components of the mammalian SWI-SNF complex, and alters the ability of BRG1 to induce growth arrest."	 	0.003168	2	15	"CCNB1,CDC2"
Pubmed	15070733	M-phase kinases induce phospho-dependent ubiquitination of somatic Wee1 by SCFbeta-TrCP.	 	0.003607	2	16	"WEE1,PLK1"
Pubmed	15364958	Functional interaction between BLM helicase and 53BP1 in a Chk1-mediated pathway during S-phase arrest.	 	0.003607	2	16	"CHEK1,H2AFX"
Pubmed	9111189	Which DNA polymerases are used for DNA-repair in eukaryotes?	 	0.003607	2	16	"RFC3,RFC4"
Pubmed	12124778	GADD45b and GADD45g are cdc2/cyclinB1 kinase inhibitors with a role in S and G2/M cell cycle checkpoints induced by genotoxic stress.	 	0.004073	2	17	"CCNB1,CDC2"
Pubmed	12927788	hLodestar/HuF2 interacts with CDC5L and is involved in pre-mRNA splicing.	 	0.004073	2	17	"TACC3,KIF4A"
Pubmed	12062430	Identification of casein kinase Ialpha interacting protein partners.	 	0.004073	2	17	"KPNA2,HMGB2"
Pubmed	12747765	Humoral immunity to human breast cancer: antigen definition and quantitative analysis of mRNA expression.	 	0.004073	2	17	"KIF15,SGOL1"
Pubmed	15146197	Transcriptome characterization elucidates signaling networks that control human ES cell growth and differentiation.	 	0.004224	10	653	"RHOBTB3,KIT,CENPE,MYO1B,ITGA2,SHCBP1,CKS1B,TIMM8A,C15orf42,NOTCH1"
Pubmed	15780175	Viral infections and cell cycle G2/M regulation.	 	0.004565	2	18	"WEE1,CDC2"
Pubmed	11840567	Cluster analysis of an extensive human breast cancer cell line protein expression map database.	 	0.004565	2	18	"KPNA2,TPM2"
Pubmed	7776974	Two classes of proteins dependent on either the presence or absence of thyroid hormone for interaction with the thyroid hormone receptor.	 	0.004565	2	18	"KIF11,TRIP13"
Pubmed	15334068	Suppression subtractive hybridization and expression profiling identifies a unique set of genes overexpressed in non-small-cell lung cancer.	 	0.005083	2	19	"KIAA0101,CCDC34"
Pubmed	16541025	Shugoshin collaborates with protein phosphatase 2A to protect cohesin.	 	0.005083	2	19	"SGOL2,SGOL1"
Pubmed	11076968	The centrosomal protein C-Nap1 is required for cell cycle-regulated centrosome cohesion.	 	0.005242	3	62	"PLK4,PLK1,CDC2"
Pubmed	12852856	"Polo-like kinase 1 regulates Nlp, a centrosome protein involved in microtubule nucleation."	 	0.005242	3	62	"PLK4,PLK1,CDC2"
Pubmed	7790358	"Cell cycle regulation of the activity and subcellular localization of Plk1, a human protein kinase implicated in mitotic spindle function."	 	0.005242	3	62	"PLK4,PLK1,CDC2"
Pubmed	16462731	The PITSLRE/CDK11p58 protein kinase promotes centrosome maturation and bipolar spindle formation.	 	0.005482	3	63	"PLK4,PLK1,CDC2"
Pubmed	15817944	HIV-1 viral protein R (Vpr) & host cellular responses.	 	0.005627	2	20	"WEE1,CDC2"
Pubmed	11572092	Characterization of cultured human prostatic epithelial cells by cluster designation antigen expression.	 	0.005639	1	1	ITGA2
Pubmed	19472128	Expression of survivin and its spliced variants in bladder tumors as a potential prognostic marker.	 	0.005639	1	1	BIRC5
Pubmed	17465238	The prognostic role of the STK15 T91A polymorphism and of STK15 mRNA expression in patients with urothelial cell carcinoma.	 	0.005639	1	1	AURKA
Pubmed	16449967	Spindle checkpoint protein Bub1 corrects mitotic aberrancy induced by human T-cell leukemia virus type I Tax.	 	0.005639	1	1	BUB1
Pubmed	18570123	Severe preeclampsia is characterized by increased placental expression of galectin-1.	 	0.005639	1	1	LGALS1
Pubmed	15583854	Kit as a human oncogenic tyrosine kinase.	 	0.005639	1	1	KIT
Pubmed	18753362	Pituitary tumor-transforming gene in endocrine and other neoplasms: a review and update.	 	0.005639	1	1	PTTG1
Pubmed	18165175	"Intracellular expression of the proliferative marker Ki-67 and viral proteins (NS3, NS5A and C) in chronic, long lasting hepatitis C virus (HCV) infection."	 	0.005639	1	1	MKI67
Pubmed	15456904	"Construction, characterization, and complementation of a conditional-lethal DNA topoisomerase IIalpha mutant human cell line."	 	0.005639	1	1	TOP2A
Pubmed	19407853	Expression of insulin-like growth factor 2 in mesenchymal neoplasms.	 	0.005639	1	1	IGF2
Pubmed	12204004	Human piebaldism: six novel mutations of the proto-oncogene KIT.	 	0.005639	1	1	KIT
Pubmed	15887239	Vitamin C transiently arrests cancer cell cycle progression in S phase and G2/M boundary by modulating the kinetics of activation and the subcellular localization of Cdc25C phosphatase.	 	0.005639	1	1	CDC25C
Pubmed	8098009	Chromosomal localization and structure of the human type II IMP dehydrogenase gene (IMPDH2).	 	0.005639	1	1	IMPDH2
Pubmed	7683315	Regulated expression of a receptor for hyaluronan-mediated motility on human thymocytes and T cells.	 	0.005639	1	1	HMMR
Pubmed	18700317	[TRPC]	 	0.005639	1	1	TRPC3
Pubmed	2970639	Increased mRNA expression of a laminin-binding protein in human colon carcinoma: complete sequence of a full-length cDNA encoding the protein.	 	0.005639	1	1	RPSA
Pubmed	18980972	Regulation of pancreatic tumor cell proliferation and chemoresistance by the histone methyltransferase enhancer of zeste homologue 2.	 	0.005639	1	1	EZH2
Pubmed	11494055	Cloning and expression of uridine/cytidine kinase cDNA from human fibrosarcoma cells.	 	0.005639	1	1	UCK2
Pubmed	18813403	Glypican3 in genetically modified human monocyte-derived dendritic cells induced specific cytotoxity against glypican3 overexpressing human hepatocellular carcinoma cells in vitro.	 	0.005639	1	1	GPC3
Pubmed	17526803	Detection of the c-kit D816V mutation in systemic mastocytosis by allele-specific PCR.	 	0.005639	1	1	KIT
Pubmed	19287997	Increased expression of galectin-1 is associated with human oral squamous cell carcinoma development.	 	0.005639	1	1	LGALS1
Pubmed	18519556	Inhibition of apoptosis in Cryptosporidium parvum-infected intestinal epithelial cells is dependent on survivin.	 	0.005639	1	1	BIRC5
Pubmed	9264263	Differential expression of galectin-1 and galectin-3 during first trimester human embryogenesis.	 	0.005639	1	1	LGALS1
Pubmed	12105219	Mass spectrometric analysis of GAP-43/neuromodulin reveals the presence of a variety of fatty acylated species.	 	0.005639	1	1	GAP43
Pubmed	12648761	Increased frequency of a new polymorphism in the cell division cycle 2 (cdc2) gene in patients with Alzheimer's disease and frontotemporal dementia.	 	0.005639	1	1	CDC2
Pubmed	9255611	Hb Watts [alpha 74(EF3) or alpha 75(EF4)Asp-->0]: a shortened alpha chain variant due to the deletion of three nucleotides in exon 2 of the alpha 2-globin gene.	 	0.005639	1	1	HBA2
Pubmed	16203868	The human macrophage mannose receptor directs Mycobacterium tuberculosis lipoarabinomannan-mediated phagosome biogenesis.	 	0.005639	1	1	MRC1
Pubmed	14657364	Human Mps1 protein kinase is required for centrosome duplication and normal mitotic progression.	 	0.005639	1	1	TTK
Pubmed	18955451	Correlation of kinase genotype and clinical outcome in the North American Intergroup Phase III Trial of imatinib mesylate for treatment of advanced gastrointestinal stromal tumor: CALGB 150105 Study by Cancer and Leukemia Group B and Southwest Oncology Group.	 	0.005639	1	1	KIT
Pubmed	15138717	Expression of IAP family proteins in colon cancers from patients with different age groups.	 	0.005639	1	1	BIRC5
Pubmed	18296609	Inhibition of human dental pulp stem cell differentiation by Notch signaling.	 	0.005639	1	1	NOTCH1
Pubmed	17909012	Pediatric KIT wild-type and platelet-derived growth factor receptor alpha-wild-type gastrointestinal stromal tumors share KIT activation but not mechanisms of genetic progression with adult gastrointestinal stromal tumors.	 	0.005639	1	1	KIT
Pubmed	17244537	Centromere identity maintained by nucleosomes assembled with histone H3 containing the CENP-A targeting domain.	 	0.005639	1	1	CENPA
Pubmed	15190005	The mannose receptor fails to enhance processing and presentation of a glycoprotein antigen in transfected fibroblasts.	 	0.005639	1	1	MRC1
Pubmed	4944483	Haemoglobin Constant Spring--a chain termination mutant?	 	0.005639	1	1	HBA2
Pubmed	18630507	Up-regulation of survivin mRNA might be a marker for non-invasive detection of non-small cell lung cancer rather than for prognosis.	 	0.005639	1	1	BIRC5
Pubmed	7864799	Identification of a novel form of the alpha 3 integrin subunit: covalent association with transferrin receptor.	 	0.005639	1	1	TFRC
Pubmed	17448445	D-box is required for the degradation of human Shugoshin and chromosome alignment.	 	0.005639	1	1	SGOL1
Pubmed	12222675	Processing of the human transferrin receptor at distinct positions within the stalk region by neutrophil elastase and cathepsin G.	 	0.005639	1	1	TFRC
Pubmed	18622584	"The sticky business of histone H2AX in V(D)J recombination, maintenance of genomic stability, and suppression of lymphoma."	 	0.005639	1	1	H2AFX
Pubmed	15662526	Relationship between intracellular localization of p34cdc2 protein and differentiation of esophageal squamous cell carcinoma.	 	0.005639	1	1	CDC2
Pubmed	19726068	Insulin-like growth factor II mRNA binding protein 1 modulates Rev-dependent human immunodeficiency virus type 1 RNA expression.	 	0.005639	1	1	IGF2BP1
Pubmed	16242000	CD117+ small cell lung cancer lacks the asp 816-->val point mutation in exon 17.	 	0.005639	1	1	KIT
Pubmed	18812553	Quantitation of Aurora kinase A gene copy number in urine sediments and bladder cancer detection.	 	0.005639	1	1	AURKA
Pubmed	18069771	"Relationship between survivin expression and recurrence, and prognosis in hepatocellular carcinoma."	 	0.005639	1	1	BIRC5
Pubmed	1155453	Hemoglobin Koya Dora: high frequency of a chain termination mutant.	 	0.005639	1	1	HBA2
Pubmed	17647192	"Expression of proliferation marker Ki67 correlates to occurrence of metastasis and prognosis, histological subtypes and HPV DNA detection in penile carcinomas."	 	0.005639	1	1	MKI67
Pubmed	19541769	IGF2BP1 enhances HCV IRES-mediated translation initiation via the 3'UTR.	 	0.005639	1	1	IGF2BP1
Pubmed	7527339	Solution structure of human insulin-like growth factor II; recognition sites for receptors and binding proteins.	 	0.005639	1	1	IGF2
Pubmed	12073047	Expression of survivin in primary glioblastomas.	 	0.005639	1	1	BIRC5
Pubmed	12009577	Immune recognition of cyclin B1 as a tumor antigen is a result of its overexpression in human tumors that is caused by non-functional p53.	 	0.005639	1	1	CCNB1
Pubmed	19074854	"Overexpression of the dual specificity phosphatase, Cdc25C, confers sensitivity on tumor cells to doxorubicin-induced cell death."	 	0.005639	1	1	CDC25C
Pubmed	17531085	Chromophore-assisted light inactivation of pKi-67 leads to inhibition of ribosomal RNA synthesis.	 	0.005639	1	1	MKI67
Pubmed	17124585	"Survivin expression in ""low-risk"" and ""high-risk"" myelodysplastic syndromes."	 	0.005639	1	1	BIRC5
Pubmed	9820822	"Genomic organization, 5'-flanking region and chromosomal localization of the human glutathione transferase A4 gene."	 	0.005639	1	1	GSTA4
Pubmed	19151023	A novel family with Lamin B1 duplication associated with adult-onset leucoencephalopathy.	 	0.005639	1	1	LMNB1
Pubmed	18387595	On the replication of genetic associations: timing can be everything!	 	0.005639	1	1	ROBO1
Pubmed	16489064	Expression of targeting protein for xklp2 associated with both malignant transformation of respiratory epithelium and progression of squamous cell lung cancer.	 	0.005639	1	1	TPX2
Pubmed	18542042	[Clinical and molecular characterization of gastrointestinal stromal tumors (GIST)]	 	0.005639	1	1	KIT
Pubmed	15004200	Survivin enhances Fas ligand expression via up-regulation of specificity protein 1-mediated gene transcription in colon cancer cells.	 	0.005639	1	1	BIRC5
Pubmed	19342096	The H19 gene imprinting in normal pregnancy and pre-eclampsia.	 	0.005639	1	1	H19
Pubmed	1426632	Sequence and localization of human NASP: conservation of a Xenopus histone-binding protein.	 	0.005639	1	1	NASP
Pubmed	11260656	Effector genes altered in MCF-7 human breast cancer cells after exposure to fractionated ionizing radiation.	 	0.005639	1	1	CCNB1
Pubmed	8211159	Human CksHs2 atomic structure: a role for its hexameric assembly in cell cycle control.	 	0.005639	1	1	CKS2
Pubmed	18824694	Emergence of hormonal and redox regulation of galectin-1 in placental mammals: implication in maternal-fetal immune tolerance.	 	0.005639	1	1	LGALS1
Pubmed	19357927	Diffuse expression of RNA-binding protein IMP3 predicts high-stage lymph node metastasis and poor prognosis in colorectal adenocarcinoma.	 	0.005639	1	1	IGF2BP3
Pubmed	17483322	Phosphorylation and activation of cell division cycle associated 8 by aurora kinase B plays a significant role in human lung carcinogenesis.	 	0.005639	1	1	CDCA8
Pubmed	10593653	BUBR1 phosphorylation is regulated during mitotic checkpoint activation.	 	0.005639	1	1	BUB1B
Pubmed	19483727	Degradation of cyclin A is regulated by acetylation.	 	0.005639	1	1	CCNA2
Pubmed	14705946	The human homologue of the mouse Surf5 gene encodes multiple alternatively spliced transcripts.	 	0.005639	1	1	TFRC
Pubmed	12203716	"Expression of cathepsins B, H, K, L, and S during human fetal lung development."	 	0.005639	1	1	CTSH
Pubmed	11213262	Netrins and netrin receptors.	 	0.005639	1	1	UNC5C
Pubmed	15070740	Complete loss of the tumor suppressor MAD2 causes premature cyclin B degradation and mitotic failure in human somatic cells.	 	0.005639	1	1	MAD2L1
Pubmed	16822655	Activated Notch1 alters differentiation of embryonic stem cells into mesodermal cell lineages at multiple stages of development.	 	0.005639	1	1	NOTCH1
Pubmed	18716626	Heterochromatin links to centromeric protection by recruiting shugoshin.	 	0.005639	1	1	SGOL1
Pubmed	975879	Assignment of the inorganic pyrophosphatase gene locus (PP) to chromosome 10 in man.	 	0.005639	1	1	PPA1
Pubmed	19683496	Cdk1 participates in BRCA1-dependent S phase checkpoint control in response to DNA damage.	 	0.005639	1	1	CDC2
Pubmed	10882722	"Differences in hyaluronic acid-mediated functions and signaling in arterial, microvessel, and vein-derived human endothelial cells."	 	0.005639	1	1	HMMR
Pubmed	17310846	LOI of IGF2 is associated with esophageal cancer and linked to methylation status of IGF2 DMR.	 	0.005639	1	1	IGF2
Pubmed	12167632	Binding of two nuclear complexes to a novel regulatory element within the human S100A9 promoter drives the S100A9 gene expression.	 	0.005639	1	1	S100A9
Pubmed	19394251	Serum transferrin receptors: Distribution and diagnostic performance in pre-school children.	 	0.005639	1	1	TFRC
Pubmed	15491148	DNA ligation catalyzed by human topoisomerase II alpha.	 	0.005639	1	1	TOP2A
Pubmed	16098468	Neuronal apoptosis linked to EglN3 prolyl hydroxylase and familial pheochromocytoma genes: developmental culling and cancer.	 	0.005639	1	1	EGLN3
Pubmed	16914748	Complex minisatellite rearrangements generated in the total or partial absence of Rad27/hFEN1 activity occur in a single generation and are Rad51 and Rad52 dependent.	 	0.005639	1	1	FEN1
Pubmed	15706404	Genomic imprinting of IGF2 is maintained in infantile hemangioma despite its high level of expression.	 	0.005639	1	1	IGF2
Pubmed	1505978	Localization of the human kinesin-related gene to band 10q24 by fluorescence in situ hybridization.	 	0.005639	1	1	KIF11
Pubmed	19307741	High orotate phosphoribosyltransferase gene expression predicts complete response to chemoradiotherapy in patients with squamous cell carcinoma of the esophagus.	 	0.005639	1	1	UMPS
Pubmed	15650047	DNA damage-induced mitotic catastrophe is mediated by the Chk1-dependent mitotic exit DNA damage checkpoint.	 	0.005639	1	1	CHEK1
Pubmed	15159028	Expression of the RNA-binding protein CRD-BP in brain and non-small cell lung tumors.	 	0.005639	1	1	IGF2BP1
Pubmed	9827716	Clinical correlates of the presence of the Asp816Val c-kit mutation in the peripheral blood mononuclear cells of patients with mastocytosis.	 	0.005639	1	1	KIT
Pubmed	19360002	Stable kinetochore-microtubule interactions depend on the Ska complex and its new component Ska3/C13Orf3.	 	0.005639	1	1	SKA3
Pubmed	17671369	"Cloning, expression, crystallization and preliminary X-ray analysis of the first two Ig domains from human roundabout 1 (Robo1)."	 	0.005639	1	1	ROBO1
Pubmed	8921380	A novel human Mcm protein: homology to the yeast replication protein Mis5 and chromosomal location.	 	0.005639	1	1	MCM6
Pubmed	17967891	LSH cooperates with DNA methyltransferases to repress transcription.	 	0.005639	1	1	HELLS
Pubmed	17524359	"Exon grafting yields a ""two active-site"" lysozyme."	 	0.005639	1	1	LYZ
Pubmed	17984174	The immunoregulatory glycan-binding protein galectin-1 triggers human platelet activation.	 	0.005639	1	1	LGALS1
Pubmed	1639825	"Expression of TTK, a novel human protein kinase, is associated with cell proliferation."	 	0.005639	1	1	TTK
Pubmed	9020058	Cyclin A is present in the endocytic compartment of rat liver cells and increases during liver regeneration.	 	0.005639	1	1	CCNA2
Pubmed	10464257	Heparin dodecasaccharide binding to platelet factor-4 and growth-related protein-alpha. Induction of a partially folded state and implications for heparin-induced thrombocytopenia.	 	0.005639	1	1	PF4
Pubmed	16220461	[A novel KIT gene mutation results in piebaldism]	 	0.005639	1	1	KIT
Pubmed	17372901	L576P KIT mutation in anal melanomas correlates with KIT protein expression and is sensitive to specific kinase inhibition.	 	0.005639	1	1	KIT
Pubmed	19018856	Survivin expression in esophageal cancer: correlation with p53 mutations and promoter polymorphism.	 	0.005639	1	1	BIRC5
Pubmed	15928668	Nuclear and cytoplasmic expression of survivin in 67 surgically resected pancreatic cancer patients.	 	0.005639	1	1	BIRC5
Pubmed	18256600	Formation and branch migration of Holliday junctions mediated by eukaryotic recombinases.	 	0.005639	1	1	RAD51
Pubmed	11799107	Bacterial lipopolysaccharide down-regulates expression of GTP cyclohydrolase I feedback regulatory protein.	 	0.005639	1	1	GCHFR
Pubmed	12078518	Redox control of cell cycle-coupled topoisomerase II alpha gene expression.	 	0.005639	1	1	TOP2A
Pubmed	12208848	Specific down-modulation of Notch1 signaling in cervical cancer cells is required for sustained HPV-E6/E7 expression and late steps of malignant transformation.	 	0.005639	1	1	NOTCH1
Pubmed	7678926	Characterization of a human protein threonine kinase isolated by screening an expression library with antibodies to phosphotyrosine.	 	0.005639	1	1	TTK
Pubmed	2486008	Cathepsin H from human placenta.	 	0.005639	1	1	CTSH
Pubmed	17957241	gammaH2AX foci form preferentially in euchromatin after ionising-radiation.	 	0.005639	1	1	H2AFX
Pubmed	9417057	Receptor-activated Ca2+ influx via human Trp3 stably expressed in human embryonic kidney (HEK)293 cells. Evidence for a non-capacitative Ca2+ entry.	 	0.005639	1	1	TRPC3
Pubmed	12532419	8q24 Copy number gains and expression of the c-myc mRNA stabilizing protein CRD-BP in primary breast carcinomas.	 	0.005639	1	1	IGF2BP1
Pubmed	17894227	[Expression of recombinant human doppel protein and analysis of its cytotoxic activities]	 	0.005639	1	1	PRND
Pubmed	17412328	Growth-associated protein 43-positive sensory nerve fibers accompanied by immature vessels are located in or near peritoneal endometriotic lesions.	 	0.005639	1	1	GAP43
Pubmed	12115583	Distinct in vivo expression patterns of survivin splice variants in renal cell carcinomas.	 	0.005639	1	1	BIRC5
Pubmed	15176053	Reduced expression of alphavbeta3 integrin in the endometrium of unexplained infertility patients with recurrent IVF-ET failures: improvement by danazol treatment.	 	0.005639	1	1	PLK1
Pubmed	19223178	Cdc2 as prognostic marker in stage UICC II colon carcinomas.	 	0.005639	1	1	CDC2
Pubmed	12833149	Inhibitor of apoptosis protein (IAP) survivin is upregulated by oncogenic c-H-Ras.	 	0.005639	1	1	BIRC5
Pubmed	1715789	"Isolation of c-kit receptor-expressing cells from bone marrow, peripheral blood, and fetal liver: functional properties and composite antigenic profile."	 	0.005639	1	1	KIT
Pubmed	19320741	Endogenous survivin modulates survival and proliferation in UVB-treated human keratinocytes.	 	0.005639	1	1	BIRC5
Pubmed	18981709	Silencing survivin results in synergy between methylseleninic acid and paclitaxel against skov3 ovarian cancer cells.	 	0.005639	1	1	BIRC5
Pubmed	17159347	Association analysis of genetic polymorphisms in the CDC2 gene with late-onset Alzheimer disease.	 	0.005639	1	1	CDC2
Pubmed	12603095	The Dutch IVS-I-116 (A --> G) (alpha2) thalassemia mutation induces Hb H inclusion bodies when found in combination with the -alpha3.7 deletion defect.	 	0.005639	1	1	HBA2
Pubmed	15861191	"ARC, an apoptosis suppressor limited to terminally differentiated cells, is induced in human breast cancer and confers chemo- and radiation-resistance."	 	0.005639	1	1	NOL3
Pubmed	18550496	[Genetic imprinted gene PEG10 expression in deciduas from inevitable abortion]	 	0.005639	1	1	PEG10
Pubmed	14504341	Lack of association of the potassium channel-associated peptide MiRP2-R83H variant with periodic paralysis.	 	0.005639	1	1	KCNE3
Pubmed	16267267	Different Plk1 functions show distinct dependencies on Polo-Box domain-mediated targeting.	 	0.005639	1	1	PLK1
Pubmed	15008265	Two new alpha chain variants: Hb Part-Dieu [alpha65(E14)Ala --> Thr (alpha2)] and Hb Decines-Charpieu [alpha69(E18)Ala --> Thr (alpha2)].	 	0.005639	1	1	HBA2
Pubmed	6671902	The first example of a deletion in the human alpha chain: hemoglobin Boyle Heights or alpha 2 6 (A4) Asp----to O beta 2.	 	0.005639	1	1	HBA2
Pubmed	18787295	Green tea polyphenol EGCG signaling pathway through the 67-kDa laminin receptor.	 	0.005639	1	1	RPSA
Pubmed	18080843	Association of the mutation for the human carboxypeptidase E gene exon 4 with the severity of coronary artery atherosclerosis.	 	0.005639	1	1	CPE
Pubmed	19032754	Induction of galectin-1 expression by HTLV-I Tax and its impact on HTLV-I infectivity.	 	0.005639	1	1	LGALS1
Pubmed	12883703	Survivin expression is significantly linked to the dedifferentiation of thyroid carcinoma.	 	0.005639	1	1	BIRC5
Pubmed	8872948	"Expression of the 14 kDa galactose-binding protein, galectin-1, on human tubular epithelial cells."	 	0.005639	1	1	LGALS1
Pubmed	19287462	Aberrant survivin expression in endometrial hyperplasia: another mechanism of progestin resistance.	 	0.005639	1	1	BIRC5
Pubmed	17023528	Estrogen modulation of MgATPase activity of nonmuscle myosin-II-B filaments.	 	0.005639	1	1	MYH10
Pubmed	17854773	Orotate phosphoribosyltransferase expression level in tumors is a potential determinant of the efficacy of 5-fluorouracil.	 	0.005639	1	1	UMPS
Pubmed	12766774	Dual phosphorylation controls Cdc25 phosphatases and mitotic entry.	 	0.005639	1	1	CDC25C
Pubmed	19043047	"TRP_2, a lipid/trafficking domain that mediates diacylglycerol-induced vesicle fusion."	 	0.005639	1	1	TRPC3
Pubmed	12082631	Downregulation of human polo-like kinase activity by antisense oligonucleotides induces growth inhibition in cancer cells.	 	0.005639	1	1	PLK1
Pubmed	9923681	Nuclear localization of Cdc25 is regulated by DNA damage and a 14-3-3 protein.	 	0.005639	1	1	CDC25C
Pubmed	17255263	Increased expression of insulin-like growth factor-II messenger RNA-binding protein 1 is associated with tumor progression in patients with lung cancer.	 	0.005639	1	1	IGF2BP1
Pubmed	15855157	Hyperphosphorylation of the BARD1 tumor suppressor in mitotic cells.	 	0.005639	1	1	BARD1
Pubmed	17252014	NOTCH1-induced T-cell leukemia in transgenic zebrafish.	 	0.005639	1	1	NOTCH1
Pubmed	11803487	Neuronal cell death in the visual cortex is a prominent feature of the X-linked recessive mitochondrial deafness-dystonia syndrome caused by mutations in the TIMM8a gene.	 	0.005639	1	1	TIMM8A
Pubmed	19168035	TRPC3 protein is expressed across the lifespan in human prefrontal cortex and cerebellum.	 	0.005639	1	1	TRPC3
Pubmed	19646878	Ska3 is required for spindle checkpoint silencing and the maintenance of chromosome cohesion in mitosis.	 	0.005639	1	1	SKA3
Pubmed	17483448	Stabilization of RAD-51-DNA filaments via an interaction domain in Caenorhabditis elegans BRCA2.	 	0.005639	1	1	RAD51
Pubmed	15226506	Ca2+ activates human homologous recombination protein Rad51 by modulating its ATPase activity.	 	0.005639	1	1	RAD51
Pubmed	12884029	p34cdc2 expression is an independent indicator for lymph node metastasis in colorectal carcinoma.	 	0.005639	1	1	CDC2
Pubmed	11735022	Genomic structure of karyopherin alpha2 ( KPNA2) within a low-copy repeat on chromosome 17q23-q24 and mutation analysis in patients with Russell-Silver syndrome.	 	0.005639	1	1	KPNA2
Pubmed	11246012	Revised nomenclature for high mobility group (HMG) chromosomal proteins.	 	0.005639	1	1	HMGN2
Pubmed	18469522	ARC (apoptosis repressor with caspase recruitment domain) is a novel marker of human colon cancer.	 	0.005639	1	1	NOL3
Pubmed	17587614	Thalassemia intermedia associated with the Hb Constant Spring EE Bart's disease in pregnancy: a molecular and hematological analysis.	 	0.005639	1	1	HBA2
Pubmed	19497660	Regulation of BIRC5 and its isoform BIRC5-2B in neuroblastoma.	 	0.005639	1	1	BIRC5
Pubmed	8977093	"Characterisation of a human homologue of a yeast cell division cycle gene, MCM6, located adjacent to the 5' end of the lactase gene on chromosome 2q21."	 	0.005639	1	1	MCM6
Pubmed	11572993	Increased levels of forkhead box M1B transcription factor in transgenic mouse hepatocytes prevent age-related proliferation defects in regenerating liver.	 	0.005639	1	1	CCNB1
Pubmed	17431037	Human prostate epithelium lacks Wee1A-mediated DNA damage-induced checkpoint enforcement.	 	0.005639	1	1	WEE1
Pubmed	7961795	Structural and functional homology between mammalian DNase IV and the 5'-nuclease domain of Escherichia coli DNA polymerase I.	 	0.005639	1	1	FEN1
Pubmed	16774942	Novel polymorphisms in the SUV39H2 histone methyltransferase and the risk of lung cancer.	 	0.005639	1	1	SUV39H2
Pubmed	17596871	Lentivirus-mediated RNA interference targeting enhancer of zeste homolog 2 inhibits hepatocellular carcinoma growth through down-regulation of stathmin.	 	0.005639	1	1	EZH2
Pubmed	17521698	"Extrapulmonary small cell carcinomas express K homology domain containing protein overexpressed in cancer, but carcinoid tumors do not."	 	0.005639	1	1	IGF2BP3
Pubmed	16564538	Susceptibility of human dendritic cells (DCs) to measles virus (MV) depends on their activation stages in conjunction with the level of CDw150: role of Toll stimulators in DC maturation and MV amplification.	 	0.005639	1	1	TFRC
Pubmed	2169566	Thymosin beta 10 levels in developing human brain and its regulation by retinoic acid in the HTB-10 neuroblastoma.	 	0.005639	1	1	TMSB10
Pubmed	18384749	Differential phosphorylation of Cdc25C phosphatase in mitosis.	 	0.005639	1	1	CDC25C
Pubmed	18616938	Evaluation of Polo-like Kinase 1 inhibition on the G2/M checkpoint in Acute Myelocytic Leukaemia.	 	0.005639	1	1	PLK1
Pubmed	18301249	Survivin expression in breast carcinoma: correlation with apoptosis and prognosis.	 	0.005639	1	1	BIRC5
Pubmed	19125585	Proteomics-based identification of differentially-expressed proteins including galectin-1 in the blood plasma of type 2 diabetic patients.	 	0.005639	1	1	LGALS1
Pubmed	8603106	Molecular characterization of the gene locus of the human cell proliferation-associated nuclear protein defined by monoclonal antibody Ki-67.	 	0.005639	1	1	MKI67
Pubmed	9572443	Galectin-1 and -3 in cells of the first trimester placental bed.	 	0.005639	1	1	LGALS1
Pubmed	9731077	"Evidence that CD31, CD49b, and CD62L are immunodominant minor histocompatibility antigens in HLA identical sibling bone marrow transplants."	 	0.005639	1	1	ITGA2
Pubmed	17593077	Cyclin A expression and its diagnostic value in pleomorphic adenoma and carcinoma expleomorphic adenoma of the parotid gland.	 	0.005639	1	1	CCNA2
Pubmed	15126108	Expression of IAP family proteins in esophageal cancer.	 	0.005639	1	1	BIRC5
Pubmed	1373318	Amplification of the topoisomerase II alpha gene in a non-small cell lung cancer cell line and characterisation of polymorphisms at the human topoisomerase II alpha and beta loci in normal tissue.	 	0.005639	1	1	TOP2A
Pubmed	8751459	c-kit ligand stimulates tyrosine phosphorylation of the c-Cbl protein in human hematopoietic cells.	 	0.005639	1	1	KIT
Pubmed	15094224	Cellular retinol-binding protein-1 expression in normal and fibrotic/cirrhotic human liver: different patterns of expression in hepatic stellate cells and (myo)fibroblast subpopulations.	 	0.005639	1	1	RBP1
Pubmed	15133482	Sgt1 is required for human kinetochore assembly.	 	0.005639	1	1	NDC80
Pubmed	11943785	Comparison of human TRPC3 channels in receptor-activated and store-operated modes. Differential sensitivity to channel blockers suggests fundamental differences in channel composition.	 	0.005639	1	1	TRPC3
Pubmed	16434397	A pathway of structural changes produced by monastrol binding to Eg5.	 	0.005639	1	1	KIF11
Pubmed	9083047	Cell cycle regulation of the human polo-like kinase (PLK) promoter.	 	0.005639	1	1	PLK1
Pubmed	2040281	Comparison of multiple forms of the high mobility group I proteins in rodent and human cells. Identification of the human high mobility group I-C protein.	 	0.005639	1	1	HMGN2
Pubmed	11158059	Human pituitary tumor-transforming gene induces angiogenesis.	 	0.005639	1	1	PTTG1
Pubmed	10987270	Aberrant transcripts of the cyclin-dependent kinase-associated protein phosphatase in hepatocellular carcinoma.	 	0.005639	1	1	CDKN3
Pubmed	17229885	Functional interaction of Aurora-A and PP2A during mitosis.	 	0.005639	1	1	AURKA
Pubmed	19549918	Active Notch1 confers a transformed phenotype to primary human melanocytes.	 	0.005639	1	1	NOTCH1
Pubmed	15489959	Mitochondrial survivin inhibits apoptosis and promotes tumorigenesis.	 	0.005639	1	1	BIRC5
Pubmed	15475964	Centromeric chromatin exhibits a histone modification pattern that is distinct from both euchromatin and heterochromatin.	 	0.005639	1	1	CENPA
Pubmed	16206250	Ki-67 protein is associated with ribosomal RNA transcription in quiescent and proliferating cells.	 	0.005639	1	1	MKI67
Pubmed	15927522	Correlation of CENP-F gene expression with tumor-proliferating activity in human salivary gland tumors.	 	0.005639	1	1	CENPF
Pubmed	19597481	Structural and functional analyses of minimal phosphopeptides targeting the polo-box domain of polo-like kinase 1.	 	0.005639	1	1	PLK1
Pubmed	13999302	Four hemoglobins in each of three brothers. Genetic and biochemical significance.	 	0.005639	1	1	HBA2
Pubmed	15856046	Clinicopathological significance of EZH2 mRNA expression in patients with hepatocellular carcinoma.	 	0.005639	1	1	EZH2
Pubmed	16061562	Identification and characterization of missense alterations in the BRCA1 associated RING domain (BARD1) gene in breast and ovarian cancer.	 	0.005639	1	1	BARD1
Pubmed	15128423	The C-->G transition in the alpha 2-globin gene of a normal alpha alpha-chromosome is responsible for the Hb G-Philadelphia variant in Sardinians.	 	0.005639	1	1	HBA2
Pubmed	16445822	"Female adnexal tumor of probable wolffian origin: morphological, immunohistochemical, and ultrastructural study with c-kit gene analysis."	 	0.005639	1	1	KIT
Pubmed	15037716	Periodic paralysis mutation MiRP2-R83H in controls: Interpretations and general recommendation.	 	0.005639	1	1	KCNE3
Pubmed	17142452	The apoptosis inhibitor ARC undergoes ubiquitin-proteasomal-mediated degradation in response to death stimuli: identification of a degradation-resistant mutant.	 	0.005639	1	1	NOL3
Pubmed	19183347	Variants in intron 13 of the ELMO1 gene are associated with diabetic nephropathy in African Americans.	 	0.005639	1	1	ELMO1
Pubmed	17917837	Clinicopathologic significance and prognostic role of cyclin E and cyclin A expression in laryngeal epithelial lesions.	 	0.005639	1	1	CCNA2
Pubmed	15728475	Platelet factor 4 differentially modulates CD4+CD25+ (regulatory) versus CD4+CD25- (nonregulatory) T cells.	 	0.005639	1	1	PF4
Pubmed	18217976	Expression of pituitary tumor-transforming gene in endometrial cancer as a prognostic marker.	 	0.005639	1	1	PTTG1
Pubmed	11733532	The HET-s prion protein of the filamentous fungus Podospora anserina aggregates in vitro into amyloid-like fibrils.	 	0.005639	1	1	H19
Pubmed	8031770	Crystal structure of recombinant human platelet factor 4.	 	0.005639	1	1	PF4
Pubmed	11433424	"Subcellular distribution, calmodulin interaction, and mitochondrial association of the hyaluronan-binding protein RHAMM in rat brain."	 	0.005639	1	1	HMMR
Pubmed	14693917	"Galectin-1 induces astrocyte differentiation, which leads to production of brain-derived neurotrophic factor."	 	0.005639	1	1	LGALS1
Pubmed	19020614	Identification of Holliday junction resolvases from humans and yeast.	 	0.005639	1	1	GEN1
Pubmed	19018266	Analysis of c-KIT expression and KIT gene mutation in human mucosal melanomas.	 	0.005639	1	1	KIT
Pubmed	18818705	Survivin expression in the bone marrow of patients with severe congenital neutropenia.	 	0.005639	1	1	BIRC5
Pubmed	16990763	Identification of Notch target genes in uncommitted T-cell progenitors: No direct induction of a T-cell specific gene program.	 	0.005639	1	1	NOTCH1
Pubmed	19034775	Survivin expression in renal cell carcinoma.	 	0.005639	1	1	BIRC5
Pubmed	12779276	Identification of alpha-thalassemia mutations in Iranian individuals with abnormal hematological indices and normal Hb A2.	 	0.005639	1	1	HBA2
Pubmed	16219694	"Silencing Cenp-F weakens centromeric cohesion, prevents chromosome alignment and activates the spindle checkpoint."	 	0.005639	1	1	CENPF
Pubmed	2845399	Cloning and sequencing of cDNA encoding human DNA topoisomerase II and localization of the gene to chromosome region 17q21-22.	 	0.005639	1	1	TOP2A
Pubmed	18761348	Structural analysis of the human Rad51 protein-DNA complex filament by tryptophan fluorescence scanning analysis: transmission of allosteric effects between ATP binding and DNA binding.	 	0.005639	1	1	RAD51
Pubmed	16518847	"Association of 11q loss, trisomy 12, and possible 16q loss with loss of imprinting of insulin-like growth factor-II in Wilms tumor."	 	0.005639	1	1	IGF2
Pubmed	16237758	Polo-like kinase 1 expression is a prognostic factor in human colon cancer.	 	0.005639	1	1	PLK1
Pubmed	11943588	BRCA1-dependent and independent functions of BARD1.	 	0.005639	1	1	BARD1
Pubmed	7691885	Identification of mutations in the coding sequence of the proto-oncogene c-kit in a human mast cell leukemia cell line causing ligand-independent activation of c-kit product.	 	0.005639	1	1	KIT
Pubmed	17687492	Heavy ion beams induce survivin expression in human hepatoma SMMC-7721 cells more effectively than X-rays.	 	0.005639	1	1	BIRC5
Pubmed	10561612	Effect of foreign N-terminal residues on the conformational stability of human lysozyme.	 	0.005639	1	1	LYZ
Pubmed	17634535	Overexpression of the centrosomal protein Aurora-A kinase is associated with poor prognosis in epithelial ovarian cancer patients.	 	0.005639	1	1	AURKA
Pubmed	15313461	Transferrin receptor 1.	 	0.005639	1	1	TFRC
Pubmed	11304565	Differential expression of cdc25 cell-cycle-activating phosphatases in human colorectal carcinoma.	 	0.005639	1	1	CDC25C
Pubmed	16953663	Levels of gamma-H2AX Foci after low-dose-rate irradiation reveal a DNA DSB rejoining defect in cells from human ATM heterozygotes in two at families and in another apparently normal individual.	 	0.005639	1	1	H2AFX
Pubmed	10608887	Heparan sulfate D-glucosaminyl 3-O-sulfotransferase-3A sulfates N-unsubstituted glucosamine residues.	 	0.005639	1	1	HS3ST3A1
Pubmed	15930286	Centromere protein H is up-regulated in primary human colorectal cancer and its overexpression induces aneuploidy.	 	0.005639	1	1	CENPH
Pubmed	15131255	The Fen1 extrahelical 3'-flap pocket is conserved from archaea to human and regulates DNA substrate specificity.	 	0.005639	1	1	FEN1
Pubmed	16127294	Polo-like kinase 1 expression in medullary carcinoma of the thyroid: its relationship with clinicopathological features.	 	0.005639	1	1	PLK1
Pubmed	1062801	Hemoglobin Wayne: a frameshift mutation detected in human hemoglobin alpha chains.	 	0.005639	1	1	HBA2
Pubmed	16005854	Depletion of 4-hydroxynonenal in hGSTA4-transfected HLE B-3 cells results in profound changes in gene expression.	 	0.005639	1	1	GSTA4
Pubmed	11925443	Redox regulation of Cdc25C.	 	0.005639	1	1	CDC25C
Pubmed	14612929	Activation of Galectin-1 gene in human hepatocellular carcinoma involves methylation-sensitive complex formations at the transcriptional upstream and downstream elements.	 	0.005639	1	1	LGALS1
Pubmed	18159594	Identification of enhancer of zeste homolog 2 expression in peripheral circulating tumor cells in metastatic prostate cancer patients: a preliminary study.	 	0.005639	1	1	EZH2
Pubmed	18037705	Getting in sync with dimeric Eg5. Initiation and regulation of the processive run.	 	0.005639	1	1	KIF11
Pubmed	17967814	Subunit dissociation of TRPC3 ion channel under high-salt condition.	 	0.005639	1	1	TRPC3
Pubmed	12237287	"Crystal structure of aurora-2, an oncogenic serine/threonine kinase."	 	0.005639	1	1	AURKA
Pubmed	18936526	The doppel (Dpl) protein influences in vitro migration capability in astrocytoma-derived cells.	 	0.005639	1	1	PRND
Pubmed	18206537	Copy number alterations of the H2AFX gene in sporadic breast cancer patients.	 	0.005639	1	1	H2AFX
Pubmed	9895333	Posttranslational deamidation of proteins: the case of hemoglobin J Sardegna [alpha50(CD8)His-->Asn-->Asp].	 	0.005639	1	1	HBA2
Pubmed	18766962	Low rather than high Ki-67 protein expression is an adverse prognostic factor in diffuse large B-cell lymphoma.	 	0.005639	1	1	MKI67
Pubmed	17488802	Study of association between common variation in the insulin-like growth factor 2 gene and indices of obesity and body size in middle-aged men and women.	 	0.005639	1	1	IGF2
Pubmed	19136933	Increased TRPC3 expression in vascular endothelium of patients with malignant hypertension.	 	0.005639	1	1	TRPC3
Pubmed	10525536	Human cyclin A is required for mitosis until mid prophase.	 	0.005639	1	1	CCNA2
Pubmed	17008426	Survivin identifies keratinocyte stem cells and is downregulated by anti-beta1 integrin during anoikis.	 	0.005639	1	1	BIRC5
Pubmed	12024010	Regulation of c-myc mRNA decay by translational pausing in a coding region instability determinant.	 	0.005639	1	1	IGF2BP1
Pubmed	18784990	Calgranulin B (S100A9) levels in bronchoalveolar lavage fluid of patients with interstitial lung diseases.	 	0.005639	1	1	S100A9
Pubmed	15702419	Chromosome size and origin as determinants of the level of CENP-A incorporation into human centromeres.	 	0.005639	1	1	CENPA
Pubmed	12781689	Control of epidermal stem cell clusters by Notch-mediated lateral induction.	 	0.005639	1	1	NOTCH1
Pubmed	18443272	Expression of c-Kit isoforms in multiple myeloma: differences in signaling and drug sensitivity.	 	0.005639	1	1	KIT
Pubmed	17589844	Molecular characterization and origins of Hb Constant Spring and Hb Paks� in Southeast Asian populations.	 	0.005639	1	1	HBA2
Pubmed	18089818	Oncogenic BARD1 isoforms expressed in gynecological cancers.	 	0.005639	1	1	BARD1
Pubmed	19487456	Bub1 regulates chromosome segregation in a kinetochore-independent manner.	 	0.005639	1	1	BUB1
Pubmed	16890287	RAD51 homologous recombination repair gene haplotypes and risk of acute myeloid leukaemia.	 	0.005639	1	1	RAD51
Pubmed	1712644	Expression of the YB5.B8 antigen (c-kit proto-oncogene product) in normal human bone marrow.	 	0.005639	1	1	KIT
Pubmed	7791211	Crystal structure of the human cell cycle protein CksHs1: single domain fold with similarity to kinase N-lobe domain.	 	0.005639	1	1	CKS1B
Pubmed	15837193	"Structure and inhibition of the human cell cycle checkpoint kinase, Wee1A kinase: an atypical tyrosine kinase with a key role in CDK1 regulation."	 	0.005639	1	1	WEE1
Pubmed	16849685	Inconsistent association between the STK15 F31I genetic polymorphism and breast cancer risk.	 	0.005639	1	1	AURKA
Pubmed	18592792	KIT protein expression in uterine sarcomas: an immunohistochemical study and review of the literature.	 	0.005639	1	1	KIT
Pubmed	10477747	Megabase chromatin domains involved in DNA double-strand breaks in vivo.	 	0.005639	1	1	H2AFX
Pubmed	9450866	Piebaldism with deafness: molecular evidence for an expanded syndrome.	 	0.005639	1	1	KIT
Pubmed	18949394	Expression of orotate phosphoribosyltransferase in colorectal carcinoma: an immunohistochemical analysis in several components of neoplastic lesions.	 	0.005639	1	1	UMPS
Pubmed	19718013	Correlation between KIT expression and KIT mutation in melanoma: a study of 173 cases with emphasis on the acral-lentiginous/mucosal type.	 	0.005639	1	1	KIT
Pubmed	11127806	Immunohistochemical localization of polo like kinase in early human placenta.	 	0.005639	1	1	PLK1
Pubmed	12926071	Survivin mRNA expression is elevated in malignant urothelial cell carcinomas and predicts time to recurrence.	 	0.005639	1	1	BIRC5
Pubmed	16331887	The Polycomb group protein EZH2 impairs DNA repair in breast epithelial cells.	 	0.005639	1	1	EZH2
Pubmed	17367465	C-kit protein expression in uterine and ovarian mesenchymal tumours.	 	0.005639	1	1	KIT
Pubmed	14534529	Human wee1 kinase is directly transactivated by and increased in association with c-Fos/AP-1: rheumatoid synovial cells overexpressing these genes go into aberrant mitosis.	 	0.005639	1	1	WEE1
Pubmed	1423611	The human XIST gene: analysis of a 17 kb inactive X-specific RNA that contains conserved repeats and is highly localized within the nucleus.	 	0.005639	1	1	XIST
Pubmed	17212588	Mitosis-specific MPM-2 phosphorylation of DNA topoisomerase IIalpha is regulated directly by protein phosphatase 2A.	 	0.005639	1	1	TOP2A
Pubmed	15929990	Contributions of Ca2+ to galectin-1-induced exposure of phosphatidylserine on activated neutrophils.	 	0.005639	1	1	LGALS1
Pubmed	12730194	"A calmodulin/inositol 1,4,5-trisphosphate (IP3) receptor-binding region targets TRPC3 to the plasma membrane in a calmodulin/IP3 receptor-independent process."	 	0.005639	1	1	TRPC3
Pubmed	16642039	A structural model for monastrol inhibition of dimeric kinesin Eg5.	 	0.005639	1	1	KIF11
Pubmed	10717241	"Analysis of the candidate target genes for mutation in microsatellite instability-positive cancers of the colorectum, stomach, and endometrium."	 	0.005639	1	1	CHEK1
Pubmed	18551998	[Prognostic value of CDC25 phosphatases expression in laryngeal cancer]	 	0.005639	1	1	CDC25C
Pubmed	18394896	Flap endonuclease 1 contributes to telomere stability.	 	0.005639	1	1	FEN1
Pubmed	17070506	Aberrant localization of importin alpha1 in hippocampal neurons in Alzheimer disease.	 	0.005639	1	1	KPNA2
Pubmed	17846275	Congenital myopathy with nemaline rods and cap structures caused by a mutation in the beta-tropomyosin gene (TPM2).	 	0.005639	1	1	TPM2
Pubmed	15690107	Fine-scale SNP map of an 11-kb genomic region at 22q13.1 containing the galectin-1 gene.	 	0.005639	1	1	LGALS1
Pubmed	1830372	Cyclin A and the retinoblastoma gene product complex with a common transcription factor.	 	0.005639	1	1	CCNA2
Pubmed	16786322	Localization of thymosin beta10 in breast cancer cells: relationship to actin cytoskeletal remodeling and cell motility.	 	0.005639	1	1	TMSB10
Pubmed	15217946	Expression and mutational status of c-kit in small-cell lung cancer: prognostic relevance.	 	0.005639	1	1	KIT
Pubmed	18431251	Knocking down galectin 1 in human hs683 glioblastoma cells impairs both angiogenesis and endoplasmic reticulum stress responses.	 	0.005639	1	1	LGALS1
Pubmed	2587254	"H2A.X. a histone isoprotein with a conserved C-terminal sequence, is encoded by a novel mRNA with both DNA replication type and polyA 3' processing signals."	 	0.005639	1	1	H2AFX
Pubmed	1572546	Isolation of a chicken HMG2 cDNA clone and evidence for an HMG2-specific 3'-untranslated region.	 	0.005639	1	1	HMGB3
Pubmed	11919394	Cytogenetic and molecular genetic abnormalities in systemic mastocytosis.	 	0.005639	1	1	KIT
Pubmed	18786645	Effect of polyamine deficiency on proteins involved in Okazaki fragment maturation.	 	0.005639	1	1	FEN1
Pubmed	15139971	Expression of the apoptosis inhibitor survivin in testicular tissue of infertile patients.	 	0.005639	1	1	BIRC5
Pubmed	17341487	Tissue-specific imprinting of the ZAC/PLAGL1 tumour suppressor gene results from variable utilization of monoallelic and biallelic promoters.	 	0.005639	1	1	PLAGL1
Pubmed	18656236	Expression of gamma-H2AX in melanocytic lesions.	 	0.005639	1	1	H2AFX
Pubmed	12736256	TRPC3 mediates T-cell receptor-dependent calcium entry in human T-lymphocytes.	 	0.005639	1	1	TRPC3
Pubmed	19483728	Upregulation of survivin during immortalization of nontransformed human fibroblasts transduced with telomerase reverse transcriptase.	 	0.005639	1	1	BIRC5
Pubmed	11078813	An additional transcript of the cdc25C gene from A431 cells encodes a functional protein.	 	0.005639	1	1	CDC25C
Pubmed	18927499	A survivin specific T-cell clone from a breast cancer patient display universal tumor cell lysis.	 	0.005639	1	1	BIRC5
Pubmed	5168859	Human milk lysozyme: unpublished data concerning the establishment of the complete primary structure; comparison with lysozymes of various origins.	 	0.005639	1	1	LYZ
Pubmed	16257837	Transforming growth factor-beta1 regulates cell growth and causes downregulation of SMemb/non-muscle myosin heavy chain B mRNA in human prostate stromal cells.	 	0.005639	1	1	MYH10
Pubmed	19383719	Lamin B1 maintains the functional plasticity of nucleoli.	 	0.005639	1	1	LMNB1
Pubmed	7910933	Tissue-differential expression of two distinct genes for human IMP dehydrogenase (E.C.1.1.1.205).	 	0.005639	1	1	IMPDH2
Pubmed	17077331	"4q loss is potentially an important genetic event in MM tumorigenesis: identification of a tumor suppressor gene regulated by promoter methylation at 4q13.3, platelet factor 4."	 	0.005639	1	1	PF4
Pubmed	19151765	Transient receptor potential channel C3 contributes to the progression of human ovarian cancer.	 	0.005639	1	1	TRPC3
Pubmed	12678716	Survivin: role in normal cells and in pathological conditions.	 	0.005639	1	1	BIRC5
Pubmed	19347901	Survivin expression in gastric cancer: Association with histomorphological response to neoadjuvant therapy and prognosis.	 	0.005639	1	1	BIRC5
Pubmed	15799974	Sp1 phosphorylation regulates apoptosis via extracellular FasL-Fas engagement.	 	0.005639	1	1	IGF2
Pubmed	12631600	Loss of cellular retinol-binding protein 1 gene expression in microdissected human ovarian cancer.	 	0.005639	1	1	RBP1
Pubmed	3167054	Differential expression of the human insulin-like growth factor II gene. Characterization of the IGF-II mRNAs and an mRNA encoding a putative IGF-II-associated protein.	 	0.005639	1	1	IGF2
Pubmed	19010635	C-kit protein expression in Wilms' tumour: an immunohistochemical study.	 	0.005639	1	1	KIT
Pubmed	18541582	Comparison of plasma ferritin concentration with the ratio of plasma transferrin receptor to ferritin in estimating body iron stores: results of 4 intervention trials.	 	0.005639	1	1	TFRC
Pubmed	17227124	Prointegrin maturation follows rapid trafficking and processing of MT1-MMP in Furin-Negative Colon Carcinoma LoVo Cells.	 	0.005639	1	1	MKI67
Pubmed	16276109	Complex mosaicism in sex reversed SRY+ male twins.	 	0.005639	1	1	SOX11
Pubmed	16011479	High-resolution crystal structure of the human Notch 1 ankyrin domain.	 	0.005639	1	1	NOTCH1
Pubmed	12914774	Inflammatory mediators expressed in human islets of Langerhans: implications for islet transplantation.	 	0.005639	1	1	TMSB10
Pubmed	11593009	Functional analysis of mutant and wild-type Drosophila origin recognition complex.	 	0.005639	1	1	ORC6L
Pubmed	1533624	"GAP-43, a protein associated with axon growth, is phosphorylated at three sites in cultured neurons and rat brain."	 	0.005639	1	1	GAP43
Pubmed	11572763	Mitotic checkpoint protein hsMAD2 as a marker predicting liver metastasis of human gastric cancers.	 	0.005639	1	1	MAD2L1
Pubmed	17548670	Genetic variation in H2AFX contributes to risk of non-Hodgkin lymphoma.	 	0.005639	1	1	H2AFX
Pubmed	9278455	Regulation of inosine-5'-monophosphate dehydrogenase type II gene expression in human T cells. Role for a novel 5' palindromic octamer sequence.	 	0.005639	1	1	IMPDH2
Pubmed	8195006	Hb Footscray or alpha 133(H16) Ser-->Arg: a new hemoglobin variant.	 	0.005639	1	1	HBA2
Pubmed	10955473	Maternal chromosome 7 hetero/isodisomy in Silver-Russell syndrome and PEG1 biallelic expression.	 	0.005639	1	1	MEST
Pubmed	18802962	RNA-binding protein insulin-like growth factor II mRNA-binding protein 3 expression promotes tumor invasion and predicts early recurrence and poor prognosis in hepatocellular carcinoma.	 	0.005639	1	1	IGF2BP3
Pubmed	18803353	Liver insulin-like growth factor 2 methylation in hepatitis C virus cirrhosis and further occurrence of hepatocellular carcinoma.	 	0.005639	1	1	IGF2
Pubmed	658418	Primary structure of human insulin-like growth factor II.	 	0.005639	1	1	IGF2
Pubmed	15359740	Quantitative mass spectrometric immunoassay of insulin like growth factor 1.	 	0.005639	1	1	IGF2
Pubmed	18522889	Epigenetic changes of pituitary tumor-derived transforming gene 1 in pancreatic cancer.	 	0.005639	1	1	PTTG1
Pubmed	12414843	A mutation in the KCNE3 potassium channel gene is associated with susceptibility to thyrotoxic hypokalemic periodic paralysis.	 	0.005639	1	1	KCNE3
Pubmed	17495533	The crystal structure of human cyclin B.	 	0.005639	1	1	CCNB1
Pubmed	18782834	Expanded binding specificity of the human histone chaperone NASP.	 	0.005639	1	1	NASP
Pubmed	19639203	Intracellular localization of survivin determines biological behavior in colorectal cancer.	 	0.005639	1	1	BIRC5
Pubmed	18727426	[Significance of the expression of nucleolar argyrophilic proteins and antigen Ki-67 in the evaluation of cell proliferative activity and in the prediction of minimal (T1) lung cancer]	 	0.005639	1	1	MKI67
Pubmed	17986860	The mammalian DNA replication elongation checkpoint: implication of Chk1 and relationship with origin firing as determined by single DNA molecule and single cell analyses.	 	0.005639	1	1	CHEK1
Pubmed	12517802	Suppression of survivin phosphorylation on Thr34 by flavopiridol enhances tumor cell apoptosis.	 	0.005639	1	1	BIRC5
Pubmed	15033665	c-KIT expression and correlation with chemotherapy resistance in ovarian carcinoma: an immunocytochemical study.	 	0.005639	1	1	KIT
Pubmed	12654446	Spontaneous and radiation-induced apoptosis in colorectal carcinoma cells with different intrinsic radiosensitivities: survivin as a radioresistance factor.	 	0.005639	1	1	BIRC5
Pubmed	8671324	The possible meaning of transferrin and its soluble receptors in seminal plasma as markers of the seminiferous epithelium.	 	0.005639	1	1	TFRC
Pubmed	17090670	Analysis of oncogenic signaling networks in glioblastoma identifies ASPM as a molecular target.	 	0.005639	1	1	ASPM
Pubmed	19353628	Compound heterozygous ASPM mutations in Pakistani MCPH families.	 	0.005639	1	1	ASPM
Pubmed	18566409	Comprehensive analysis of HLA-DR- and HLA-DP4-restricted CD4+ T cell response specific for the tumor-shared antigen survivin in healthy donors and cancer patients.	 	0.005639	1	1	BIRC5
Pubmed	15155616	Pneumocystis activates human alveolar macrophage NF-kappaB signaling through mannose receptors.	 	0.005639	1	1	MRC1
Pubmed	12372835	Endocytosed transferrin receptors recycle via distinct dynamin and phosphatidylinositol 3-kinase-dependent pathways.	 	0.005639	1	1	TFRC
Pubmed	19427669	IMP3 expression in non-small cell lung cancer.	 	0.005639	1	1	IGF2BP3
Pubmed	10799505	The human nm23-H4 gene product is a mitochondrial nucleoside diphosphate kinase.	 	0.005639	1	1	NME4
Pubmed	18339864	Triggering senescence programs suppresses Chk1 kinase and sensitizes cells to genotoxic stresses.	 	0.005639	1	1	CHEK1
Pubmed	656444	Purification and kinetic properties of human erythrocyte Mg2+-dependent inorganic pyrophosphatase.	 	0.005639	1	1	PPA1
Pubmed	16682612	Platelet expression profiling and clinical validation of myeloid-related protein-14 as a novel determinant of cardiovascular events.	 	0.005639	1	1	S100A9
Pubmed	18591626	"Defective mRNA levels are responsible for a beta-thalassemia phenotype associated with Hb Federico II, a novel hemoglobin variant [beta-106 (G8) Leu->Val]."	 	0.005639	1	1	HBA2
Pubmed	18204430	Emi1 protein accumulation implicates misregulation of the anaphase promoting complex/cyclosome pathway in ovarian clear cell carcinoma.	 	0.005639	1	1	FBXO5
Pubmed	2398066	Inhibition of the receptor-mediated endocytosis of diferric transferrin is associated with the covalent modification of the transferrin receptor with palmitic acid.	 	0.005639	1	1	TFRC
Pubmed	18354082	Cell-surface and mitotic-spindle RHAMM: moonlighting or dual oncogenic functions?	 	0.005639	1	1	HMMR
Pubmed	18795925	Association of paediatric mastocytosis with a polymorphism resulting in an amino acid substitution (M541L) in the transmembrane domain of c-KIT.	 	0.005639	1	1	KIT
Pubmed	12125737	Galectin-1 modulates human glioblastoma cell migration into the brain through modifications to the actin cytoskeleton and levels of expression of small GTPases.	 	0.005639	1	1	LGALS1
Pubmed	16525682	Correlation of human Bub1 expression with tumor-proliferating activity in salivary gland tumors.	 	0.005639	1	1	BUB1
Pubmed	10446958	BRCA2 is required for ionizing radiation-induced assembly of Rad51 complex in vivo.	 	0.005639	1	1	RAD51
Pubmed	19500341	Upregulation of CENP-H in tongue cancer correlates with poor prognosis and progression.	 	0.005639	1	1	CENPH
Pubmed	12515398	Human FEN-1 can process the 5'-flap DNA of CTG/CAG triplet repeat derived from human genetic diseases by length and sequence dependent manner.	 	0.005639	1	1	FEN1
Pubmed	1985261	A gene from the region of the human X inactivation centre is expressed exclusively from the inactive X chromosome.	 	0.005639	1	1	XIST
Pubmed	18562694	Transcriptional regulation of serine/threonine kinase-15 (STK15) expression by hypoxia and HIF-1.	 	0.005639	1	1	AURKA
Pubmed	15829320	"Quantitative evaluation of the apoptosis regulating genes Survivin, Bcl-2 and Bax in inflammatory and malignant pleural lesions."	 	0.005639	1	1	BIRC5
Pubmed	11063595	Expression and structural characterization of the recombinant human doppel protein.	 	0.005639	1	1	PRND
Pubmed	10216086	Potential role for hyaluronan and the hyaluronan receptor RHAMM in mobilization and trafficking of hematopoietic progenitor cells.	 	0.005639	1	1	HMMR
Pubmed	18829549	Nuclear survivin abrogates multiple cell cycle checkpoints and enhances viral oncolysis.	 	0.005639	1	1	BIRC5
Pubmed	15942958	"Proteomics profiling of nuclear proteins for kidney fibroblasts suggests hypoxia, meiosis, and cancer may meet in the nucleus."	 	0.005639	1	1	MNS1
Pubmed	6273413	Biosynthesis of the human transferrin receptor in cultured cells.	 	0.005639	1	1	TFRC
Pubmed	19587234	Structure of human Rad51 protein filament from molecular modeling and site-specific linear dichroism spectroscopy.	 	0.005639	1	1	RAD51
Pubmed	12453426	Flap endonuclease 1 efficiently cleaves base excision repair and DNA replication intermediates assembled into nucleosomes.	 	0.005639	1	1	FEN1
Pubmed	7835432	Quarternary structure amplification of protein folding differences observed in 'native' platelet factor-4.	 	0.005639	1	1	PF4
Pubmed	19501868	Characterization of c-Kit expression and activation in KSHV-infected endothelial cells.	 	0.005639	1	1	KIT
Pubmed	10377239	A conserved RGD (Arg-Gly-Asp) motif in the transferrin receptor is required for binding to transferrin.	 	0.005639	1	1	TFRC
Pubmed	18204862	Upregulation of topoisomerase IIalpha expression in advanced gallbladder carcinoma: a potential chemotherapeutic target.	 	0.005639	1	1	TOP2A
Pubmed	12015319	A 63-base pair DNA segment containing an Sp1 site but not a canonical E2F site can confer growth-dependent and E2F-mediated transcriptional stimulation of the human ASK gene encoding the regulatory subunit for human Cdc7-related kinase.	 	0.005639	1	1	DBF4
Pubmed	16398215	Characterisation of the promoter region of the human DNA-repair gene Rad51.	 	0.005639	1	1	RAD51
Pubmed	12845534	Sodium-coupled neutral amino acid (System N/A) transporters of the SLC38 gene family.	 	0.005639	1	1	SLC38A4
Pubmed	18422639	Beta-tropomyosin mutations alter tropomyosin isoform composition.	 	0.005639	1	1	TPM2
Pubmed	7867622	"Promoter region of the transcriptional unit for human alpha 1-chimaerin, a neuron-specific GTPase-activating protein for p21rac."	 	0.005639	1	1	CHN1
Pubmed	803847	Antigenic and antiheparin properties of human platelet factor 4 (PF4).	 	0.005639	1	1	PF4
Pubmed	11063929	Control of mitosis by changes in the subcellular location of cyclin-B1-Cdk1 and Cdc25C.	 	0.005639	1	1	CDC25C
Pubmed	10969775	"Genomic instability at the BUB1 locus in colorectal cancer, but not in non-small cell lung cancer."	 	0.005639	1	1	BUB1
Pubmed	19487297	Selective killing of cancer cells by suppression of geminin activity.	 	0.005639	1	1	GMNN
Pubmed	3191134	Hb natal or alpha 2(minus Tyr-Arg) beta 2: a high oxygen affinity alpha chain variant with a deleted carboxy-terminus resulting from a TAC----TAA (Tyr----terminating codon) mutation in codon alpha 140.	 	0.005639	1	1	HBA2
Pubmed	11528129	Integration of porcine chromosome 13 maps.	 	0.005639	1	1	GAP43
Pubmed	19202951	Resistance to acetylsalicylic acid in patients after ischemic stroke.	 	0.005639	1	1	ITGA2
Pubmed	17204284	Exonization of Alu-generated splice variants in the survivin gene of human and non-human primates.	 	0.005639	1	1	BIRC5
Pubmed	18677382	[Correlation of TFRC polymorphism with the susceptibility and clinicopathologic phenotypes of IgA nephropathy]	 	0.005639	1	1	TFRC
Pubmed	19477424	Bringing H2AX into the angiogenesis family.	 	0.005639	1	1	H2AFX
Pubmed	14632727	Topoisomerase IIalpha gene (TOP2A) amplification and deletion in cancer--more common than anticipated.	 	0.005639	1	1	TOP2A
Pubmed	18181175	The expression of BIRC5 is correlated with loss of specific chromosomal regions in breast carcinomas.	 	0.005639	1	1	BIRC5
Pubmed	10958657	Establishment of the paternal methylation imprint of the human H19 and MEST/PEG1 genes during spermatogenesis.	 	0.005639	1	1	MEST
Pubmed	9242382	Cloning a novel member of the human interferon-inducible gene family associated with control of tumorigenicity in a model of human melanoma.	 	0.005639	1	1	AIM2
Pubmed	18665828	Reference limits and behaviour of serum transferrin receptor in children 6-10 years of age.	 	0.005639	1	1	TFRC
Pubmed	18699967	Reduced level of the spindle checkpoint protein BUB1B is associated with aneuploidy in colorectal cancers.	 	0.005639	1	1	BUB1B
Pubmed	17535553	"Laminin receptor 1: a novel protein interacting with human circadian clock protein, hPer1."	 	0.005639	1	1	RPSA
Pubmed	19348623	Mutations in the lamin B1 gene are not present in multiple sclerosis.	 	0.005639	1	1	LMNB1
Pubmed	17381065	Roles of platelet factor 4 in hematopoiesis and angiogenesis.	 	0.005639	1	1	PF4
Pubmed	18719053	"Elevated free IGF2 levels in localized, early-stage breast cancer in women."	 	0.005639	1	1	IGF2
Pubmed	18425431	siRNA-mediated silencing of the 37/67-kDa high affinity laminin receptor in Hep3B cells induces apoptosis.	 	0.005639	1	1	RPSA
Pubmed	1967822	Hepatitis B virus integration in a cyclin A gene in a hepatocellular carcinoma.	 	0.005639	1	1	CCNA2
Pubmed	11260214	"The ""flap"" endonuclease gene FEN1 is excluded as a candidate gene implicated in the CAG repeat expansion underlying Huntington disease."	 	0.005639	1	1	FEN1
Pubmed	12440778	Multidrug-resistance-associated protein MGr1-Ag is identical to the human 37-kDa laminin receptor precursor.	 	0.005639	1	1	RPSA
Pubmed	3384700	First observation of Hb Montgomery [alpha 48(CD6)Leu----Arg] in Tunisia.	 	0.005639	1	1	HBA2
Pubmed	1562590	"Subunit structure of calgranulins A and B obtained from sputum, plasma, granulocytes and cultured epithelial cells."	 	0.005639	1	1	S100A9
Pubmed	17996867	Cluster specific regulation pattern of upstream regulatory elements in human alpha- and beta-globin gene clusters.	 	0.005639	1	1	HBA2
Pubmed	19135902	miR-320 targets transferrin receptor 1 (CD71) and inhibits cell proliferation.	 	0.005639	1	1	TFRC
Pubmed	9782095	"Cloning and characterization of a novel human gene, TM4SF6, encoding a protein belonging to the transmembrane 4 superfamily, and mapped to Xq22."	 	0.005639	1	1	TSPAN6
Pubmed	12388768	Mad2 and BubR1 function in a single checkpoint pathway that responds to a loss of tension.	 	0.005639	1	1	BUB1B
Pubmed	15986442	Survivin expression by metastatic melanoma predicts poor disease outcome in patients receiving adjuvant polyvalent vaccine.	 	0.005639	1	1	BIRC5
Pubmed	18662664	Dissociation of the carbohydrate-binding and splicing activities of galectin-1.	 	0.005639	1	1	LGALS1
Pubmed	17509581	Survivin gene expression in granulosa cells from infertile patients undergoing in vitro fertilization-embryo transfer.	 	0.005639	1	1	BIRC5
Pubmed	17451195	Downregulation of survivin by RNAi inhibits growth of human gastric carcinoma cells.	 	0.005639	1	1	BIRC5
Pubmed	17304502	Galectin-1 expression in cancer-associated stromal cells correlates tumor invasiveness and tumor progression in breast cancer.	 	0.005639	1	1	LGALS1
Pubmed	9732225	Prognostic significance of 67-kDa laminin receptor expression in advanced gastric cancer.	 	0.005639	1	1	RPSA
Pubmed	15867347	Two functional coding single nucleotide polymorphisms in STK15 (Aurora-A) coordinately increase esophageal cancer risk.	 	0.005639	1	1	AURKA
Pubmed	7981751	Clustered base substitutions in CTP synthetase conferring drug resistance in Chinese hamster ovary cells.	 	0.005639	1	1	CTPS
Pubmed	8566845	'Fragile' liver and massive hepatic haemorrhage due to hereditary amyloidosis.	 	0.005639	1	1	LYZ
Pubmed	18652770	Influence of SiRNA targeting survivin on chemosensitivity of H460/cDDP lung cancer cells.	 	0.005639	1	1	BIRC5
Pubmed	18568298	Characterization of c-kit (CD117) expression in human normal pituitary cells and pituitary adenomas.	 	0.005639	1	1	KIT
Pubmed	19004025	Overexpression of PLK1 is associated with poor survival by inhibiting apoptosis via enhancement of survivin level in esophageal squamous cell carcinoma.	 	0.005639	1	1	PLK1
Pubmed	9881859	Hippocampal and cortical growth-associated protein-43 messenger RNA in schizophrenia.	 	0.005639	1	1	GAP43
Pubmed	18636190	"Expression analysis of the autosomal recessive primary microcephaly genes MCPH1 (microcephalin) and MCPH5 (ASPM, abnormal spindle-like, microcephaly associated) in human malignant gliomas."	 	0.005639	1	1	ASPM
Pubmed	16513317	Association of platelet glycoprotein Ia polymorphism with minor increase of risk for oral cancer.	 	0.005639	1	1	ITGA2
Pubmed	3272163	Cloning of human GAP-43: growth association and ischemic resurgence.	 	0.005639	1	1	GAP43
Pubmed	17433255	Identification of the auto-inhibitory domains of Aurora-A kinase.	 	0.005639	1	1	AURKA
Pubmed	17869043	Arsenic trioxide induced the apoptosis of laryngeal cancer via down-regulation of survivin mRNA.	 	0.005639	1	1	BIRC5
Pubmed	16525632	"Survivin associates with cell proliferation in renal cancer cells: regulation of survivin expression by insulin-like growth factor-1, interferon-gamma and a novel NF-kappaB inhibitor."	 	0.005639	1	1	BIRC5
Pubmed	10022450	The involvement of a conserved family of RNA binding proteins in embryonic development and carcinogenesis.	 	0.005639	1	1	PTTG1
Pubmed	1956325	Protein kinase catalytic domain sequence database: identification of conserved features of primary structure and classification of family members.	 	0.005639	1	1	TTK
Pubmed	10534505	Hereditary renal amyloidosis associated with variant lysozyme in a large English family.	 	0.005639	1	1	LYZ
Pubmed	18266976	Expression of survivin protein in pterygium and relationship with oxidative DNA damage.	 	0.005639	1	1	BIRC5
Pubmed	18214972	Detailed conformational dynamics of juxtamembrane region and activation loop in c-Kit kinase activation process.	 	0.005639	1	1	KIT
Pubmed	15619008	Myosin regulation in the migration of tumor cells and leukocytes within a three-dimensional collagen matrix.	 	0.005639	1	1	MYH10
Pubmed	11798021	Protein import into mitochondria.	 	0.005639	1	1	TIMM13
Pubmed	15705874	Cdk inhibition in human cells compromises chk1 function and activates a DNA damage response.	 	0.005639	1	1	CHEK1
Pubmed	10936055	"ADAMTS9, a novel member of the ADAM-TS/ metallospondin gene family."	 	0.005639	1	1	ADAMTS9
Pubmed	12708489	Polo-like kinase 1 (PLK1) is overexpressed in primary colorectal cancers.	 	0.005639	1	1	PLK1
Pubmed	15155566	Formation of amyloid aggregates from human lysozyme and its disease-associated variants using hydrostatic pressure.	 	0.005639	1	1	LYZ
Pubmed	14741722	Identification of a novel splice variant of the human anti-apoptopsis gene survivin.	 	0.005639	1	1	BIRC5
Pubmed	16604065	Individual dimers of the mitotic kinesin motor Eg5 step processively and support substantial loads in vitro.	 	0.005639	1	1	KIF11
Pubmed	17935280	Aurora-A kinase regulates NF-kappaB activity: lessons from combination studies.	 	0.005639	1	1	AURKA
Pubmed	19603021	BubR1 as a prognostic marker for recurrence-free survival rates in epithelial ovarian cancers.	 	0.005639	1	1	BUB1B
Pubmed	16456711	"Mitosin/CENP-F in mitosis, transcriptional control, and differentiation."	 	0.005639	1	1	CENPF
Pubmed	12586351	Detection of bound and free IGF-1 and IGF-2 in human plasma via biomolecular interaction analysis mass spectrometry.	 	0.005639	1	1	IGF2
Pubmed	11342607	Distinct BMI-1 and EZH2 expression patterns in thymocytes and mature T cells suggest a role for Polycomb genes in human T cell differentiation.	 	0.005639	1	1	EZH2
Pubmed	15502806	c-kit Expression in small cell carcinoma of the urinary bladder: prognostic and therapeutic implications.	 	0.005639	1	1	KIT
Pubmed	16623776	Ki67 staining pattern as a diagnostic tool in the evaluation of lymphoproliferative disorders.	 	0.005639	1	1	MKI67
Pubmed	16820192	"Integrin, alpha 2 gene C807T polymorphism and risk of ischemic stroke: a meta-analysis."	 	0.005639	1	1	ITGA2
Pubmed	12584564	Overexpression of KIT in chromophobe renal cell carcinoma.	 	0.005639	1	1	KIT
Pubmed	12824919	Glypican-3 is overexpressed in human hepatocellular carcinoma.	 	0.005639	1	1	GPC3
Pubmed	11318613	"A retrotransposon-derived gene, PEG10, is a novel imprinted gene located on human chromosome 7q21."	 	0.005639	1	1	PEG10
Pubmed	17425682	Overexpressed active Notch1 induces cell growth arrest of HeLa cervical carcinoma cells.	 	0.005639	1	1	NOTCH1
Pubmed	12207350	Massive inflammatory syndrome and lymphocytic immunodeficiency in KARAP/DAP12-transgenic mice.	 	0.005639	1	1	TYROBP
Pubmed	11946553	Comparison between human and bird lysozymes: Note concerning the previously observed deletion.	 	0.005639	1	1	LYZ
Pubmed	17164499	Platelet glycoprotein Ia 807C/T and 873G/A polymorphisms in patients with venous thromboembolism.	 	0.005639	1	1	ITGA2
Pubmed	17675670	The transforming acidic coiled coil 3 protein is essential for spindle-dependent chromosome alignment and mitotic survival.	 	0.005639	1	1	TACC3
Pubmed	11849445	Hereditary renal amyloidosis caused by a new variant lysozyme W64R in a French family.	 	0.005639	1	1	LYZ
Pubmed	16377583	The latent transforming growth factor beta binding protein (LTBP) family.	 	0.005639	1	1	AURKA
Pubmed	17332078	Epigenetic control of hematopoietic stem cell aging the case of Ezh2.	 	0.005639	1	1	EZH2
Pubmed	17125796	A novel compound heterozygous mutation in the DAP12 gene in a patient with Nasu-Hakola disease.	 	0.005639	1	1	TYROBP
Pubmed	8449522	Assignment of the human carboxypeptidase E (CPE) gene to chromosome 4.	 	0.005639	1	1	CPE
Pubmed	9150364	Identification of a zinc-finger gene at 6q25: a chromosomal region implicated in development of many solid tumors.	 	0.005639	1	1	PLAGL1
Pubmed	18625637	Defects in Notch1 upregulation upon activation of T Cells from patients with systemic lupus erythematosus are related to lupus disease activity.	 	0.005639	1	1	NOTCH1
Pubmed	10390347	The N-terminal domain of the human Rad51 protein binds DNA: structure and a DNA binding surface as revealed by NMR.	 	0.005639	1	1	RAD51
Pubmed	7687267	Novel mutations of the KIT (mast/stem cell growth factor receptor) proto-oncogene in human piebaldism.	 	0.005639	1	1	KIT
Pubmed	19047099	Imatinib targeting of KIT-mutant oncoprotein in melanoma.	 	0.005639	1	1	KIT
Pubmed	18246046	Clinicopathologic profile of gastrointestinal stromal tumors (GISTs) with primary KIT exon 13 or exon 17 mutations: a multicenter study on 54 cases.	 	0.005639	1	1	KIT
Pubmed	7625268	Meiosis specific transcription and functional proteins.	 	0.005639	1	1	MNS1
Pubmed	17676662	Proteomic analysis of EZH2 downstream target proteins in hepatocellular carcinoma.	 	0.005639	1	1	EZH2
Pubmed	10734083	Initiation of DNA fragmentation during apoptosis induces phosphorylation of H2AX histone at serine 139.	 	0.005639	1	1	H2AFX
Pubmed	18666437	Analysis of UbcH10 expression represents a useful tool for the diagnosis and therapy of astrocytic tumors.	 	0.005639	1	1	UBE2C
Pubmed	11601506	A novel deafness/dystonia peptide gene mutation that causes dystonia in female carriers of Mohr-Tranebjaerg syndrome.	 	0.005639	1	1	TIMM8A
Pubmed	8127874	"Induction and down-regulation of PLK, a human serine/threonine kinase expressed in proliferating cells and tumors."	 	0.005639	1	1	PLK1
Pubmed	18480048	Crystal structure of the catalytic domain of the mitotic checkpoint kinase Mps1 in complex with SP600125.	 	0.005639	1	1	TTK
Pubmed	14570714	Analysis of the ARMD1 locus: evidence that a mutation in HEMICENTIN-1 is associated with age-related macular degeneration in a large family.	 	0.005639	1	1	HMCN1
Pubmed	15481888	Molecular characterization of Hb Val de Marne [alpha133(H16)Ser-->Arg; AGC-->AGA; (alpha2)] in a Chinese family.	 	0.005639	1	1	HBA2
Pubmed	267922	Amino acid sequence of human platelet factor 4.	 	0.005639	1	1	PF4
Pubmed	2140694	Negative regulation of human megakaryocytopoiesis by human platelet factor 4 and beta thromboglobulin: comparative analysis in bone marrow cultures from normal individuals and patients with essential thrombocythaemia and immune thrombocytopenic purpura.	 	0.005639	1	1	PF4
Pubmed	16330588	Association between the insulin-like growth factor 2 gene (IGF2) and scores on the Eating Attitudes Test in nonclinical subjects: a family-based study.	 	0.005639	1	1	IGF2
Pubmed	8294032	A human gene that shows identity with the gene encoding the angiotensin receptor is located on chromosome 11.	 	0.005639	1	1	APLNR
Pubmed	7901236	The human platelet alloantigens Br(a) and Brb are associated with a single amino acid polymorphism on glycoprotein Ia (integrin subunit alpha 2).	 	0.005639	1	1	ITGA2
Pubmed	15579456	Role of Cks1 overexpression in oral squamous cell carcinomas: cooperation with Skp2 in promoting p27 degradation.	 	0.005639	1	1	CKS1B
Pubmed	18292942	An activated Notch1 signaling pathway inhibits cell proliferation and induces apoptosis in human esophageal squamous cell carcinoma cell line EC9706.	 	0.005639	1	1	NOTCH1
Pubmed	19038421	Association between survivin gene promoter -31 C/G polymorphism and urothelial carcinoma risk in Taiwanese population.	 	0.005639	1	1	BIRC5
Pubmed	17090598	Chromosomal integration of LTR-flanked DNA in yeast expressing HIV-1 integrase: down regulation by RAD51.	 	0.005639	1	1	RAD51
Pubmed	17873905	"CDC20, a potential cancer therapeutic target, is negatively regulated by p53."	 	0.005639	1	1	CDC20
Pubmed	15661849	Silencing of polo-like kinase (Plk) 1 via siRNA causes induction of apoptosis and impairment of mitosis machinery in human prostate cancer cells: implications for the treatment of prostate cancer.	 	0.005639	1	1	PLK1
Pubmed	12667811	"Cell-cell fusion and internalization of the CNS-based, HIV-1 co-receptor, APJ."	 	0.005639	1	1	APLNR
Pubmed	7797075	Activation of the TFIID-TFIIA complex with HMG-2.	 	0.005639	1	1	HMGB2
Pubmed	17008890	Activating mutations in NOTCH1 in acute myeloid leukemia and lineage switch leukemias.	 	0.005639	1	1	NOTCH1
Pubmed	16411201	Monoallelic BUB1B mutations and defective mitotic-spindle checkpoint in seven families with premature chromatid separation (PCS) syndrome.	 	0.005639	1	1	BUB1B
Pubmed	17786310	Low level STK15 amplification in histologically benign urothelium of patients with bladder cancer adversely predicts patient outcome following cystectomy.	 	0.005639	1	1	AURKA
Pubmed	18946675	Survivin -31G/C promoter polymorphism and sporadic colorectal cancer.	 	0.005639	1	1	BIRC5
Pubmed	16951231	Aurora kinase A messenger RNA overexpression is correlated with tumor progression and shortened survival in head and neck squamous cell carcinoma.	 	0.005639	1	1	AURKA
Pubmed	19092852	"The candidate immunotherapeutical target, the receptor for hyaluronic acid-mediated motility, is associated with proliferation and shows prognostic value in B-cell chronic lymphocytic leukemia."	 	0.005639	1	1	HMMR
Pubmed	19161979	Role of Cks1 amplification and overexpression in breast cancer.	 	0.005639	1	1	CKS1B
Pubmed	12738867	Unmasking the S-phase-promoting potential of cyclin B1.	 	0.005639	1	1	CCNB1
Pubmed	10582339	Early signaling pathways activated by c-Kit in hematopoietic cells.	 	0.005639	1	1	KIT
Pubmed	17261582	Geminin cleavage during apoptosis by caspase-3 alters its binding ability to the SWI/SNF subunit Brahma.	 	0.005639	1	1	GMNN
Pubmed	12411510	The flexible loop of human FEN1 endonuclease is required for flap cleavage during DNA replication and repair.	 	0.005639	1	1	FEN1
Pubmed	14996863	Loss of insulin-like growth factor-II imprinting and the presence of screen-detected colorectal adenomas in women.	 	0.005639	1	1	IGF2
Pubmed	17877643	Transcriptional expression of survivin and its splice variants in cervical carcinomas.	 	0.005639	1	1	BIRC5
Pubmed	11847097	Aurora-A overexpression reveals tetraploidization as a major route to centrosome amplification in p53-/- cells.	 	0.005639	1	1	AURKA
Pubmed	14706340	"Dual roles of human BubR1, a mitotic checkpoint kinase, in the monitoring of chromosomal instability."	 	0.005639	1	1	BUB1B
Pubmed	18648854	Role of KIT expression in the prognosis of clear cell renal cell carcinomas in Chinese patients.	 	0.005639	1	1	KIT
Pubmed	19122145	Direct imaging of human Rad51 nucleoprotein dynamics on individual DNA molecules.	 	0.005639	1	1	RAD51
Pubmed	2970671	The human laminin receptor is a member of the integrin family of cell adhesion receptors.	 	0.005639	1	1	RPSA
Pubmed	1294118	Organization of the gene encoding the human macrophage mannose receptor (MRC1).	 	0.005639	1	1	MRC1
Pubmed	19585499	Detection of cell-free BIRC5 mRNA in effusions and its potential diagnostic value for differentiating malignant and benign effusions.	 	0.005639	1	1	BIRC5
Pubmed	16704960	The association of serum ferritin and transferrin receptor concentrations with mortality in women with human immunodeficiency virus infection.	 	0.005639	1	1	TFRC
Pubmed	18369708	Platelet factor 4/heparin antibody (IgG/M/A) in healthy subjects: a literature analysis of commercial immunoassay results.	 	0.005639	1	1	PF4
Pubmed	18794333	Orientation and structure of the Ndc80 complex on the microtubule lattice.	 	0.005639	1	1	NDC80
Pubmed	11222143	"Hemicentin, a conserved extracellular member of the immunoglobulin superfamily, organizes epithelial and other cell attachments into oriented line-shaped junctions."	 	0.005639	1	1	HMCN1
Pubmed	18417535	Identification of a novel human Rad51 variant that promotes DNA strand exchange.	 	0.005639	1	1	RAD51
Pubmed	2265255	Molecular basis for alpha-thalassemia associated with the structural mutant hemoglobin Suan-Dok (alpha 2 109leu----arg)	 	0.005639	1	1	HBA2
Pubmed	18727915	NS5ATP9 gene regulated by NF-kappaB signal pathway.	 	0.005639	1	1	KIAA0101
Pubmed	19136932	IGF2BP3 (IMP3) expression is a marker of unfavorable prognosis in ovarian carcinoma of clear cell subtype.	 	0.005639	1	1	IGF2BP3
Pubmed	19008176	Notch signaling in benign and malignant ameloblastic neoplasms.	 	0.005639	1	1	NOTCH1
Pubmed	19148534	Anticancer effects on TACC3 by treatment of paclitaxel in HPV-18 positive cervical carcinoma cells.	 	0.005639	1	1	TACC3
Pubmed	16741248	KIT mutation in mast cells and other bone marrow hematopoietic cell lineages in systemic mast cell disorders: a prospective study of the Spanish Network on Mastocytosis (REMA) in a series of 113 patients.	 	0.005639	1	1	KIT
Pubmed	10851081	DNA repair and recombination factor Rad51 is over-expressed in human pancreatic adenocarcinoma.	 	0.005639	1	1	RAD51
Pubmed	9154840	"Plk is a functional homolog of Saccharomyces cerevisiae Cdc5, and elevated Plk activity induces multiple septation structures."	 	0.005639	1	1	PLK1
Pubmed	18284933	"Aurora kinase expression in colorectal adenocarcinoma: correlations with clinicopathological features, p16 expression, and telomerase activity."	 	0.005639	1	1	AURKA
Pubmed	16889749	The involvement of the 67 kDa laminin receptor-mediated modulation of cytoskeleton in the degranulation inhibition induced by epigallocatechin-3-O-gallate.	 	0.005639	1	1	RPSA
Pubmed	18627058	Constitutional H19 hypermethylation in a patient with isolated cardiac tumor.	 	0.005639	1	1	H19
Pubmed	9013569	Binding of mammalian ribosomal protein complex P0.P1.P2 and protein L12 to the GTPase-associated domain of 28 S ribosomal RNA and effect on the accessibility to anti-28 S RNA autoantibody.	 	0.005639	1	1	RPL12
Pubmed	7904902	CENP-F is a .ca 400 kDa kinetochore protein that exhibits a cell-cycle dependent localization.	 	0.005639	1	1	CENPF
Pubmed	8621570	Essential amino acids for substrate binding and catalysis of human flap endonuclease 1.	 	0.005639	1	1	FEN1
Pubmed	11887182	Local cooperativity in the unfolding of an amyloidogenic variant of human lysozyme.	 	0.005639	1	1	LYZ
Pubmed	17255272	Centromere protein H is a novel prognostic marker for nasopharyngeal carcinoma progression and overall patient survival.	 	0.005639	1	1	CENPH
Pubmed	12529403	Transcriptional activities of the zinc finger protein Zac are differentially controlled by DNA binding.	 	0.005639	1	1	PLAGL1
Pubmed	15846392	Securin is overexpressed in breast cancer.	 	0.005639	1	1	PTTG1
Pubmed	17488975	The deoxyribonucleic acid repair protein flap endonuclease-1 modulates estrogen-responsive gene expression.	 	0.005639	1	1	FEN1
Pubmed	18546942	[Immunohistochemical assessment of molecule Ki67 in nasal polyps tissue]	 	0.005639	1	1	MKI67
Pubmed	15794639	Structure of the conserved transcriptional repressor enhancer of rudimentary homolog.	 	0.005639	1	1	ERH
Pubmed	18417478	Competitive interactions of collagen and a jararhagin-derived disintegrin peptide with the integrin alpha2-I domain.	 	0.005639	1	1	ITGA2
Pubmed	16469711	[Knockdown of PLK1 mRNA by special siRNA]	 	0.005639	1	1	PLK1
Pubmed	9677318	Orientation of sugars bound to the principal C-type carbohydrate-recognition domain of the macrophage mannose receptor.	 	0.005639	1	1	MRC1
Pubmed	8001982	Assignment of the human macrophage mannose receptor gene (MRC1) to 10p13 by in situ hybridization and PCR-based somatic cell hybrid mapping.	 	0.005639	1	1	MRC1
Pubmed	19644024	Rapid detection of KIT mutations in core-binding factor acute myeloid leukemia using high-resolution melting analysis.	 	0.005639	1	1	KIT
Pubmed	16881736	Live attenuated Salmonella carrying platelet factor 4 cDNAs as radioprotectors.	 	0.005639	1	1	PF4
Pubmed	14695343	KIT mutations are common in testicular seminomas.	 	0.005639	1	1	KIT
Pubmed	15286155	Genomic imprinting of PPP1R9A encoding neurabin I in skeletal muscle and extra-embryonic tissues.	 	0.005639	1	1	PPP1R9A
Pubmed	18032822	Survivin is highly expressed and promotes cell survival in malignant peritoneal mesothelioma.	 	0.005639	1	1	BIRC5
Pubmed	9402003	Structural basis of integrin-mediated signal transduction.	 	0.005639	1	1	ITGA2
Pubmed	11783945	PBK/TOPK is a novel mitotic kinase which is upregulated in Burkitt's lymphoma and other highly proliferative malignant cells.	 	0.005639	1	1	PBK
Pubmed	3368322	Complete nucleotide sequence of the adult skeletal isoform of human skeletal muscle beta-tropomyosin.	 	0.005639	1	1	TPM2
Pubmed	9020106	Epstein-Barr virus nuclear antigen 1 forms a complex with the nuclear transporter karyopherin alpha2.	 	0.005639	1	1	KPNA2
Pubmed	19151773	A second NOTCH1 chromosome rearrangement: t(9;14)(q34.3;q11.2) in T-cell neoplasia.	 	0.005639	1	1	NOTCH1
Pubmed	19204928	Oncogenic role of nuclear accumulated Aurora-A.	 	0.005639	1	1	AURKA
Pubmed	16404364	Expression of cytoplasmic and nuclear Survivin in primary and secondary human glioblastoma.	 	0.005639	1	1	BIRC5
Pubmed	11839741	Biochemical characterization of the human RAD51 protein. III. Modulation of DNA binding by adenosine nucleotides.	 	0.005639	1	1	RAD51
Pubmed	16426921	C-KIT expression in ductal carcinoma in situ of the breast: co-expression with HER-2/neu.	 	0.005639	1	1	KIT
Pubmed	11522816	Kinetics and regulation of site-specific endonucleolytic cleavage of human IGF-II mRNAs.	 	0.005639	1	1	IGF2
Pubmed	1370874	Dominant negative and loss of function mutations of the c-kit (mast/stem cell growth factor receptor) proto-oncogene in human piebaldism.	 	0.005639	1	1	KIT
Pubmed	18786438	High frequency of loss of heterozygosity at 11p15 and IGF2 overexpression are not related to clinical outcome in childhood adrenocortical tumors positive for the R337H TP53 mutation.	 	0.005639	1	1	IGF2
Pubmed	15936846	Differential expression of survivin-2B and survivin-DeltaEx3 is inversely associated with disease relapse and patient survival in non-small-cell lung cancer (NSCLC).	 	0.005639	1	1	BIRC5
Pubmed	12087463	Frequent expression of new cancer/testis gene D40/AF15q14 in lung cancers of smokers.	 	0.005639	1	1	CASC5
Pubmed	18794841	Cell-cycle coordination between DNA replication and recombination revealed by a vertebrate N-end rule degron-Rad51.	 	0.005639	1	1	RAD51
Pubmed	12963850	Targeting Survivin expression induces cell proliferation defect and subsequent cell death involving mitochondrial pathway in myeloid leukemic cells.	 	0.005639	1	1	BIRC5
Pubmed	15205592	807 C/T Polymorphism of the glycoprotein Ia gene and pharmacogenetic modulation of platelet response to dual antiplatelet treatment.	 	0.005639	1	1	ITGA2
Pubmed	2373685	Primary structure of the mannose receptor contains multiple motifs resembling carbohydrate-recognition domains.	 	0.005639	1	1	MRC1
Pubmed	3611070	Isolation and characterization of a mannose-specific endocytosis receptor from human placenta.	 	0.005639	1	1	MRC1
Pubmed	17023078	Lack of association between the platelet glycoprotein Ia C807T gene polymorphism and coronary artery disease: a meta-analysis.	 	0.005639	1	1	ITGA2
Pubmed	17609820	Expression of survivin and its clinicopathological correlations in invasive ductal carcinoma of the breast.	 	0.005639	1	1	BIRC5
Pubmed	2383549	Human splenic galaptin: physicochemical characterization.	 	0.005639	1	1	LGALS1
Pubmed	16826583	Inhibition of survivin reduces cell proliferation and induces apoptosis in human endometrial cancer.	 	0.005639	1	1	BIRC5
Pubmed	11842186	Arsenite-induced Cdc25C degradation is through the KEN-box and ubiquitin-proteasome pathway.	 	0.005639	1	1	CDC25C
Pubmed	17072721	Predicting the antitumor effects of STI571 by analysis of c-kit gene mutations in gastrointestinal stromal tumors of the stomach: Report of a case.	 	0.005639	1	1	KIT
Pubmed	19357306	A single amino acid change converts Aurora-A into Aurora-B-like kinase in terms of partner specificity and cellular function.	 	0.005639	1	1	AURKA
Pubmed	18097100	Crystallization and preliminary crystallographic analysis of the catalytic domain of human flap endonuclease 1 in complex with a nicked DNA product: use of a DPCS kit for efficient protein-DNA complex crystallization.	 	0.005639	1	1	FEN1
Pubmed	18701842	[Clinical significance of the relationship between expression of survivin and effects of neoadjuvant chemotherapy in locally advanced breast cancer]	 	0.005639	1	1	BIRC5
Pubmed	12185844	How mitochondria import hydrophilic and hydrophobic proteins.	 	0.005639	1	1	TIMM13
Pubmed	16252009	Unstable microtubule capture at kinetochores depleted of the centromere-associated protein CENP-F.	 	0.005639	1	1	CENPF
Pubmed	16142362	Unexpected intracellular localization of the AMD-associated cystatin C variant.	 	0.005639	1	1	UMPS
Pubmed	15729715	Transcriptional activation of survivin through the NF-kappaB pathway by human T-cell leukemia virus type I tax.	 	0.005639	1	1	BIRC5
Pubmed	6094009	"The human transferrin receptor gene: genomic organization, and the complete primary structure of the receptor deduced from a cDNA sequence."	 	0.005639	1	1	TFRC
Pubmed	19104841	Alterations of ROBO1/DUTT1 and ROBO2 loci in early dysplastic lesions of head and neck: clinical and prognostic implications.	 	0.005639	1	1	ROBO1
Pubmed	17525640	"Assessment of cell proliferation in benign, premalignant and malignant skin lesions."	 	0.005639	1	1	MKI67
Pubmed	12466273	Platelet factor 4 enhances the binding of oxidized low-density lipoprotein to vascular wall cells.	 	0.005639	1	1	PF4
Pubmed	15314207	Sequential dimerization of human zipcode-binding protein IMP1 on RNA: a cooperative mechanism providing RNP stability.	 	0.005639	1	1	IGF2BP1
Pubmed	5789664	Platelet factor 4 and adenosine diphosphate release during human platelet aggregation.	 	0.005639	1	1	PF4
Pubmed	1962755	Assignment of a human cyclin A gene to 4q26-q27.	 	0.005639	1	1	CCNA2
Pubmed	15298990	"Insulin-like growth factor-2 genotype, fat-free mass, and muscle performance across the adult life span."	 	0.005639	1	1	IGF2
Pubmed	16045773	Ki67 expression in different epithelial types in columnar lined oesophagus indicates varying levels of expanded and aberrant proliferative patterns.	 	0.005639	1	1	MKI67
Pubmed	10544214	"Quantitative comparison of growth-associated protein GAP-43, neuron-specific enolase, and protein gene product 9.5 as neuronal markers in mature human intestine."	 	0.005639	1	1	GAP43
Pubmed	5794113	Hemoglobin L Ferrara in a Jewish family associated with a hemolytic state in the propositus.	 	0.005639	1	1	HBA2
Pubmed	16818692	Molecular profiling of laser-microdissected matched tumor and normal breast tissue identifies karyopherin alpha2 as a potential novel prognostic marker in breast cancer.	 	0.005639	1	1	KPNA2
Pubmed	15195112	"Survivin expression in hepatocellular carcinoma: correlation with proliferation, prognostic parameters, and outcome."	 	0.005639	1	1	BIRC5
Pubmed	18173750	The Lys313 residue of the human Rad51 protein negatively regulates the strand-exchange activity.	 	0.005639	1	1	RAD51
Pubmed	18391576	Suppression of survivin expression by short hairpin RNA induces apoptosis in human laryngeal carcinoma cells.	 	0.005639	1	1	BIRC5
Pubmed	12569573	Regulation of the H19 imprinting gene expression in human nasopharyngeal carcinoma by methylation.	 	0.005639	1	1	H19
Pubmed	11246537	Lack of association between the platelet glycoprotein Ia C807T gene polymorphism and myocardial infarction in Japanese. An approach entailing melting curve analysis with specific fluorescent hybridization probes.	 	0.005639	1	1	ITGA2
Pubmed	15701574	Overexpression of mature insulin-like growth factor (IGF)-II leads to growth arrest in Caco-2 human colon cancer cells.	 	0.005639	1	1	IGF2
Pubmed	15617841	Expression of c-kit protooncogene in human hepatocellular carcinoma.	 	0.005639	1	1	KIT
Pubmed	18431718	Overexpression of TRPC3 reduces the content of intracellular calcium stores in HEK-293 cells.	 	0.005639	1	1	TRPC3
Pubmed	7730145	Isolation of a cDNA for a growth factor of vascular endothelial cells from human lung cancer cells: its identity with insulin-like growth factor II.	 	0.005639	1	1	IGF2
Pubmed	8266075	"Isolation of ORC6, a component of the yeast origin recognition complex by a one-hybrid system."	 	0.005639	1	1	ORC6L
Pubmed	11680623	Colocalization of KCNQ1/KCNE channel subunits in the mouse gastrointestinal tract.	 	0.005639	1	1	KCNE3
Pubmed	18391401	Structure of wild-type Plk-1 kinase domain in complex with a selective DARPin.	 	0.005639	1	1	PLK1
Pubmed	19185918	Level of DNA topoisomerase IIalpha mRNA predicts the treatment response of relapsed acute leukemic patients.	 	0.005639	1	1	TOP2A
Pubmed	11103947	Cellular mechanisms of netrin function: long-range and short-range actions.	 	0.005639	1	1	UNC5C
Pubmed	14720137	Immunohistochemical analysis of centromere protein F expression in buccal and gingival squamous cell carcinoma.	 	0.005639	1	1	CENPF
Pubmed	16407161	Role of Src in C3 transient receptor potential channel function and evidence for a heterogeneous makeup of receptor- and store-operated Ca2+ entry channels.	 	0.005639	1	1	TRPC3
Pubmed	1380674	Predominant naturally processed peptides bound to HLA-DR1 are derived from MHC-related molecules and are heterogeneous in size.	 	0.005639	1	1	TFRC
Pubmed	17957445	Molecular scanning of the human carboxypeptidase E gene for mutations in Chinese subjects with coronary atherosclerosis.	 	0.005639	1	1	CPE
Pubmed	18055328	Detection of survivin mRNA in urine of patients with superficial urothelial cell carcinomas.	 	0.005639	1	1	BIRC5
Pubmed	7780197	The critical glycosylation site of human transferrin receptor contains a high-mannose oligosaccharide.	 	0.005639	1	1	TFRC
Pubmed	17360367	Convergent chemical synthesis and high-resolution x-ray structure of human lysozyme.	 	0.005639	1	1	LYZ
Pubmed	16192727	Genetic association of CDC2 with cerebrospinal fluid tau in Alzheimer's disease.	 	0.005639	1	1	CDC2
Pubmed	15649650	Changes in tetrahydrobiopterin levels in endothelial cells and adult cardiomyocytes induced by LPS and hydrogen peroxide--a role for GFRP?	 	0.005639	1	1	GCHFR
Pubmed	7795414	"Synthesis of an endogeneous lectin, galectin-1, by human endothelial cells is up-regulated by endothelial cell activation."	 	0.005639	1	1	LGALS1
Pubmed	7869048	"Human thymic epithelial cells express an endogenous lectin, galectin-1, which binds to core 2 O-glycans on thymocytes and T lymphoblastoid cells."	 	0.005639	1	1	LGALS1
Pubmed	17850717	[Study on the association between STK15 Phe31Ile polymorphisms and esophageal squamous cell carcinoma]	 	0.005639	1	1	AURKA
Pubmed	18536151	Absence of the H2AX mutations in idiopathic infertile men with spermatogenic impairment.	 	0.005639	1	1	H2AFX
Pubmed	12111198	High levels of cellular retinol binding protein-1 expression in leiomyosarcoma: possible implications for diagnostic evaluation.	 	0.005639	1	1	RBP1
Pubmed	9598313	"Promoter sequence, expression, and fine chromosomal mapping of the human gene (MLP) encoding the MARCKS-like protein: identification of neighboring and linked polymorphic loci for MLP and MACS and use in the evaluation of human neural tube defects."	 	0.005639	1	1	MARCKSL1
Pubmed	19492862	Computational studies of human galectin-1: role of conserved tryptophan residue in stacking interaction with carbohydrate ligands.	 	0.005639	1	1	LGALS1
Pubmed	16407408	Tumor protein D52 (TPD52): a novel B-cell/plasma-cell molecule with unique expression pattern and Ca(2+)-dependent association with annexin VI.	 	0.005639	1	1	BIRC5
Pubmed	18581052	Co-localization of galectin-1 with GM1 ganglioside in the course of its clathrin- and raft-dependent endocytosis.	 	0.005639	1	1	LGALS1
Pubmed	19291919	Association of Ki67 with raised transaminases in hepatocellular carcinoma.	 	0.005639	1	1	MKI67
Pubmed	17634533	Predictive value of Aurora-A/STK15 expression for late stage epithelial ovarian cancer patients treated by adjuvant chemotherapy.	 	0.005639	1	1	AURKA
Pubmed	19352701	Polymorphisms of survivin promoter are associated with risk of esophageal squamous cell carcinoma.	 	0.005639	1	1	BIRC5
Pubmed	9632739	Distribution of integrins during human fetal lung development.	 	0.005639	1	1	ITGA2
Pubmed	8425765	Thymosin beta-10 expression in melanoma cell lines and melanocytic lesions: a new progression marker for human cutaneous melanoma.	 	0.005639	1	1	TMSB10
Pubmed	17678435	Novel interaction between HPV E6 and BARD1 (BRCA1-associated ring domain 1) and its biologic roles.	 	0.005639	1	1	BARD1
Pubmed	12609713	The effect of ursodeoxycholic acid on the survivin in thapsigargin-induced apoptosis.	 	0.005639	1	1	BIRC5
Pubmed	18948754	Stable knockdown of PASG enhances DNA demethylation but does not accelerate cellular senescence in TIG-7 human fibroblasts.	 	0.005639	1	1	HELLS
Pubmed	7999076	Cloning and sequence of the human type II IMP dehydrogenase gene.	 	0.005639	1	1	IMPDH2
Pubmed	18625225	PEG10 directly regulated by E2Fs might have a role in the development of hepatocellular carcinoma.	 	0.005639	1	1	PEG10
Pubmed	7988572	"Purification and characterization of the human Rad51 protein, an analogue of E. coli RecA."	 	0.005639	1	1	RAD51
Pubmed	19047178	Activation of the enhancer of zeste homologue 2 gene by the human papillomavirus E7 oncoprotein.	 	0.005639	1	1	EZH2
Pubmed	9796701	Homozygous deletions at 3p12 in breast and lung cancer.	 	0.005639	1	1	ROBO1
Pubmed	16751364	Transgenic galectin-1 induces maturation of dendritic cells that elicit contrasting responses in naive and activated T cells.	 	0.005639	1	1	LGALS1
Pubmed	18455984	Implications for kinetochore-microtubule attachment from the structure of an engineered Ndc80 complex.	 	0.005639	1	1	NDC80
Pubmed	15745733	Underdiagnosed amyloidosis: amyloidosis of lysozyme variant.	 	0.005639	1	1	LYZ
Pubmed	18206228	Epigenetic and genetic analysis of the survivin promoter in acute myeloid leukemia.	 	0.005639	1	1	BIRC5
Pubmed	9353311	"Cell cycle-regulated expression, phosphorylation, and degradation of p55Cdc. A mammalian homolog of CDC20/Fizzy/slp1."	 	0.005639	1	1	CDC20
Pubmed	12364337	Nuclear translocation of plk1 mediated by its bipartite nuclear localization signal.	 	0.005639	1	1	PLK1
Pubmed	15685548	Gene therapy for colon cancer by adeno-associated viral vector-mediated transfer of survivin Cys84Ala mutant.	 	0.005639	1	1	BIRC5
Pubmed	4422784	"Haemoglobin Icaria, a new chain-termination mutant with causes alpha thalassaemia."	 	0.005639	1	1	HBA2
Pubmed	17463002	Phosphorylation of human CTP synthetase 1 by protein kinase C: identification of Ser(462) and Thr(455) as major sites of phosphorylation.	 	0.005639	1	1	CTPS
Pubmed	19047145	Opposite effects of Notch-1 and Notch-2 on mesothelioma cell survival under hypoxia are exerted through the Akt pathway.	 	0.005639	1	1	NOTCH1
Pubmed	18469532	"DNA damage-induced S phase arrest in human breast cancer depends on Chk1, but G2 arrest can occur independently of Chk1, Chk2 or MAPKAPK2."	 	0.005639	1	1	CHEK1
Pubmed	17219423	Association between Aurora-A kinase polymorphisms and age of onset of hereditary nonpolyposis colorectal cancer in a Caucasian population.	 	0.005639	1	1	AURKA
Pubmed	9191099	"The melanin-concentrating hormone gene in human: flanking region analysis, fine chromosome mapping, and tissue-specific expression."	 	0.005639	1	1	PMCH
Pubmed	17351902	RNAse A-like enzymes in serum inhibit the anti-neoplastic activity of siRNA targeting polo-like kinase 1.	 	0.005639	1	1	PLK1
Pubmed	12008077	CD34 and CD117 are overexpressed in AML and may be valuable to detect minimal residual disease.	 	0.005639	1	1	KIT
Pubmed	16049965	Preferential amplification of AURKA 91A (Ile31) in familial colorectal cancers.	 	0.005639	1	1	AURKA
Pubmed	18955703	Persistent epigenetic differences associated with prenatal exposure to famine in humans.	 	0.005639	1	1	IGF2
Pubmed	16153602	Phosphorylation of histone H2AX at M phase in human cells without DNA damage response.	 	0.005639	1	1	H2AFX
Pubmed	12649825	Retrospective analysis of Ki-67 antigen expression in paraffin tissue blocks of laryngeal squamous cell carcinoma.	 	0.005639	1	1	MKI67
Pubmed	15961392	Checkpoint kinase 1 regulates diallyl trisulfide-induced mitotic arrest in human prostate cancer cells.	 	0.005639	1	1	CHEK1
Pubmed	12942315	Up-regulation of cytoskeletal-associated protein 2 in primary human gastric adenocarcinomas.	 	0.005639	1	1	CKAP2
Pubmed	12125963	"Expression of IGF-II, IGFBP-2, -5, and -6 in meningiomas with different brain invasiveness."	 	0.005639	1	1	IGF2
Pubmed	15037254	Levels of MCM4 phosphorylation and DNA synthesis in DNA replication block checkpoint control.	 	0.005639	1	1	MCM4
Pubmed	11543626	Characterization of a novel human cell-cycle-regulated homologue of Drosophila dlg1.	 	0.005639	1	1	DLGAP5
Pubmed	10329152	Human glutathione transferase A4-4 crystal structures and mutagenesis reveal the basis of high catalytic efficiency with toxic lipid peroxidation products.	 	0.005639	1	1	GSTA4
Pubmed	19111388	Increased topoisomerase IIalpha expression in colorectal cancer is associated with advanced disease and chemotherapeutic resistance via inhibition of apoptosis.	 	0.005639	1	1	TOP2A
Pubmed	17125792	Action of transcription factors in the control of transferrin receptor expression in human brain endothelium.	 	0.005639	1	1	TFRC
Pubmed	17965335	"Terminally differentiated neutrophils predominantly express Survivin-2 alpha, a dominant-negative isoform of survivin."	 	0.005639	1	1	BIRC5
Pubmed	17029194	[Characteristics of IGF-II gene imprinting in twin placentas]	 	0.005639	1	1	IGF2
Pubmed	16624550	A specific RAD51 haplotype increases breast cancer risk in Jewish non-Ashkenazi high-risk women.	 	0.005639	1	1	RAD51
Pubmed	2565024	"Human non-histone chromosomal protein HMG-17: identification, characterization, chromosome localization and RFLPs of a functional gene from the large multigene family."	 	0.005639	1	1	HMGN2
Pubmed	15944763	Detailed chromosomal characterization of the breast cancer cell line MCF7 with special focus on the expression of the serine-threonine kinase 15.	 	0.005639	1	1	AURKA
Pubmed	16723430	Human Rad51 protein displays enhanced homologous pairing of DNA sequences resembling those at genetically unstable loci.	 	0.005639	1	1	RAD51
Pubmed	9657776	c-kit activating mutations and mast cell proliferation in human leukemia.	 	0.005639	1	1	KIT
Pubmed	19017756	Clinically distinct epigenetic subgroups in Silver-Russell syndrome: the degree of H19 hypomethylation associates with phenotype severity and genital and skeletal anomalies.	 	0.005639	1	1	H19
Pubmed	17202408	Two regions of the tail are necessary for the isoform-specific functions of nonmuscle myosin IIB.	 	0.005639	1	1	MYH10
Pubmed	15970649	Polymorphism in IGF-2 as a surrogate marker for predisposition towards tobacco chewing-mediated oral cancer.	 	0.005639	1	1	IGF2
Pubmed	16888915	[The \classical\ macrophage marker CD68 is strongly expressed in primary human fibroblasts]	 	0.005639	1	1	CD68
Pubmed	17157168	Chronic myeloid leukemia cells express tumor-associated antigens eliciting specific CD8+ T-cell responses and are lacking costimulatory molecules.	 	0.005639	1	1	HMMR
Pubmed	12163483	Shedding of the transferrin receptor is mediated constitutively by an integral membrane metalloprotease sensitive to tumor necrosis factor alpha protease inhibitor-2.	 	0.005639	1	1	TFRC
Pubmed	11239456	Role of BRCA2 in control of the RAD51 recombination and DNA repair protein.	 	0.005639	1	1	RAD51
Pubmed	9220539	Modulation of globin gene expression in cultured erythroid precursors derived from normal individuals: transcriptional and posttranscriptional regulation by hemin.	 	0.005639	1	1	HBE1
Pubmed	12208476	Platelet collagen receptor GPIa (C807T/HPA-5) haplotype is not associated with an increased risk of fatal coronary events in middle-aged men.	 	0.005639	1	1	ITGA2
Pubmed	12484634	Hb Manawatu [alpha 37(C2)Pro-->Leu]: a new mildly unstable mutation at an invariant proline residue.	 	0.005639	1	1	HBA2
Pubmed	10870886	"Hb Campinas [alpha26(B7)Ala -->Val]: a novel, electrophoretically silent, variant."	 	0.005639	1	1	HBA2
Pubmed	12150968	Chk1 signaling pathways that mediated G(2)M checkpoint in relation to the cellular resistance to the novel topoisomerase I poison BNP1350.	 	0.005639	1	1	CHEK1
Pubmed	18390729	"Unique effects of KIT D816V in BaF3 cells: induction of cluster formation, histamine synthesis, and early mast cell differentiation antigens."	 	0.005639	1	1	KIT
Pubmed	17662764	Novel NOTCH1 mutations in patients with bicuspid aortic valve disease and thoracic aortic aneurysms.	 	0.005639	1	1	NOTCH1
Pubmed	17640905	"Human Th2 cells selectively express the orexigenic peptide, pro-melanin-concentrating hormone."	 	0.005639	1	1	PMCH
Pubmed	10574465	"Human SOX11, an upregulated gene during the neural differentiation, has a long 3' untranslated region."	 	0.005639	1	1	SOX11
Pubmed	1445199	"Developmental regulation and neuronal expression of the mRNA of rat n-chimaerin, a p21rac GAP:cDNA sequence."	 	0.005639	1	1	CHN1
Pubmed	2079431	Hb Sun Prairie or alpha(2)130(H13)Ala----Pro beta 2; second observation in an Indian adult.	 	0.005639	1	1	HBA2
Pubmed	19182490	67-kDa laminin receptor in human bile duct carcinoma.	 	0.005639	1	1	RPSA
Pubmed	16332542	Aurora A kinase-coated beads function as microtubule-organizing centers and enhance RanGTP-induced spindle assembly.	 	0.005639	1	1	AURKA
Pubmed	16707600	NOTCH1 mutations in T-cell acute lymphoblastic leukemia: prognostic significance and implication in multifactorial leukemogenesis.	 	0.005639	1	1	NOTCH1
Pubmed	12673366	Analysis of the G/C polymorphism in the 5'-untranslated region of the RAD51 gene in breast cancer.	 	0.005639	1	1	RAD51
Pubmed	19116313	Galectin-1 induces reversible phosphatidylserine exposure at the plasma membrane.	 	0.005639	1	1	LGALS1
Pubmed	12629412	The roles of supernumerical X chromosomes and XIST expression in testicular germ cell tumors.	 	0.005639	1	1	XIST
Pubmed	15637054	"Molecular mechanism of inhibition of survivin transcription by the GC-rich sequence-selective DNA binding antitumor agent, hedamycin: evidence of survivin down-regulation associated with drug sensitivity."	 	0.005639	1	1	BIRC5
Pubmed	18715619	KIT codon 558 insertions in gastrointestinal stromal tumors. Analysis of 17 rare KIT mutants.	 	0.005639	1	1	KIT
Pubmed	14654085	Identification of a S100 calcium-binding protein expressed in HL-60 cells treated with all-trans retinoic acid by two-dimensional electrophoresis and mass spectrometry.	 	0.005639	1	1	S100A9
Pubmed	18599610	Increased survivin expression confers chemoresistance to tumor-associated endothelial cells.	 	0.005639	1	1	BIRC5
Pubmed	18511877	Immunohistochemical study of glypican 3 in thyroid cancer.	 	0.005639	1	1	GPC3
Pubmed	18607558	Molecular and clinical findings and their correlations in Silver-Russell syndrome: implications for a positive role of IGF2 in growth determination and differential imprinting regulation of the IGF2-H19 domain in bodies and placentas.	 	0.005639	1	1	IGF2
Pubmed	18336724	Expression of survivin and enhanced polypogenesis in nasal polyps.	 	0.005639	1	1	BIRC5
Pubmed	7643352	"A new X linked recessive deafness syndrome with blindness, dystonia, fractures, and mental deficiency is linked to Xq22."	 	0.005639	1	1	TIMM8A
Pubmed	15475955	Constitutional aneuploidy and cancer predisposition caused by biallelic mutations in BUB1B.	 	0.005639	1	1	BUB1B
Pubmed	19608149	Nuclear cyclin B1 is overexpressed in low-malignant-potential ovarian tumors but not in epithelial ovarian cancer.	 	0.005639	1	1	CCNB1
Pubmed	17880528	Immunohistochemical detection of galectin-1 in renal biopsy specimens of children and its possible role in proteinuric glomerulopathies.	 	0.005639	1	1	LGALS1
Pubmed	10362788	Activating c-kit gene mutations in human germ cell tumors.	 	0.005639	1	1	KIT
Pubmed	7501023	Apoptosis of T cells mediated by galectin-1.	 	0.005639	1	1	LGALS1
Pubmed	1371879	p21ras activation via hemopoietin receptors and c-kit requires tyrosine kinase activity but not tyrosine phosphorylation of p21ras GTPase-activating protein.	 	0.005639	1	1	KIT
Pubmed	9892021	"Structure, expression, and function of human pituitary tumor-transforming gene (PTTG)."	 	0.005639	1	1	PTTG1
Pubmed	16597595	Rapamycin inhibits growth and survival of D816V-mutated c-kit mast cells.	 	0.005639	1	1	KIT
Pubmed	16432157	AIM2 suppresses human breast cancer cell proliferation in vitro and mammary tumor growth in a mouse model.	 	0.005639	1	1	AIM2
Pubmed	8007985	"Structural and functional conservation of the human homolog of the Schizosaccharomyces pombe rad2 gene, which is required for chromosome segregation and recovery from DNA damage."	 	0.005639	1	1	FEN1
Pubmed	17632543	Presence of homozygous KIT exon 11 mutations is strongly associated with malignant clinical behavior in gastrointestinal stromal tumors.	 	0.005639	1	1	KIT
Pubmed	17302439	The human Rad51 K133A mutant is functional for DNA double-strand break repair in human cells.	 	0.005639	1	1	RAD51
Pubmed	18660822	A conserved face of the Jagged/Serrate DSL domain is involved in Notch trans-activation and cis-inhibition.	 	0.005639	1	1	NOTCH1
Pubmed	1572663	Pro-melanin-concentrating hormone gene (PMCH) is localized on human chromosome 12q and rat chromosome 7.	 	0.005639	1	1	PMCH
Pubmed	9461507	Human glutathione transferase A4-4: an alpha class enzyme with high catalytic efficiency in the conjugation of 4-hydroxynonenal and other genotoxic products of lipid peroxidation.	 	0.005639	1	1	GSTA4
Pubmed	16306994	Spatial regulation of beta-actin translation by Src-dependent phosphorylation of ZBP1.	 	0.005639	1	1	IGF2BP1
Pubmed	15591026	PTTG's C-terminal PXXP motifs modulate critical cellular processes in vitro.	 	0.005639	1	1	PTTG1
Pubmed	17217624	Expression and effect of inhibition of the ubiquitin-conjugating enzyme E2C on esophageal adenocarcinoma.	 	0.005639	1	1	UBE2C
Pubmed	18480049	Crystal structure of the BARD1 ankyrin repeat domain and its functional consequences.	 	0.005639	1	1	BARD1
Pubmed	7557986	Structural organization of the human gene (LMNB1) encoding nuclear lamin B1.	 	0.005639	1	1	LMNB1
Pubmed	19446503	Histone H2A.X Tyr142 phosphorylation: a novel sWItCH for apoptosis?	 	0.005639	1	1	H2AFX
Pubmed	5284421	Primary structure of lysozymes from man and goose.	 	0.005639	1	1	LYZ
Pubmed	17276342	Chk1 is required for spindle checkpoint function.	 	0.005639	1	1	CHEK1
Pubmed	11933156	Cdc25C expression in meiotically competent and incompetent goat oocytes.	 	0.005639	1	1	CDC25C
Pubmed	12826751	Effects of higher-order nuclear structure and Rad51 overexpression on radiation-induced chromosome rearrangements.	 	0.005639	1	1	RAD51
Pubmed	15247327	Generation of longer 3' cDNA fragments from massively parallel signature sequencing tags.	 	0.005639	1	1	NASP
Pubmed	18591651	Two different mitotic checkpoint inhibitors of the anaphase-promoting complex/cyclosome antagonize the action of the activator Cdc20.	 	0.005639	1	1	CDC20
Pubmed	3620699	An alpha-globin gene initiation codon mutation in a black family with HbH disease.	 	0.005639	1	1	HBA2
Pubmed	2546758	The human lysozyme gene. Sequence organization and chromosomal localization.	 	0.005639	1	1	LYZ
Pubmed	12707725	Diagnostic value of serum transferrin receptor and glycosylated hemoglobin on hemolytic anemia.	 	0.005639	1	1	TFRC
Pubmed	11444988	DNA cleavage and religation by human topoisomerase II alpha at high temperature.	 	0.005639	1	1	TOP2A
Pubmed	17493600	Reference intervals of serum transferrin receptors in pre-school children in Zimbabwe.	 	0.005639	1	1	TFRC
Pubmed	18667445	Inhibition of Aurora-A suppresses epithelial-mesenchymal transition and invasion by downregulating MAPK in nasopharyngeal carcinoma cells.	 	0.005639	1	1	AURKA
Pubmed	17545586	DNA methylation and complete transcriptional silencing of cancer genes persist after depletion of EZH2.	 	0.005639	1	1	EZH2
Pubmed	19015196	The SNAT4 isoform of the system A amino acid transporter is functional in human placental microvillous plasma membrane.	 	0.005639	1	1	SLC38A4
Pubmed	18976158	Interpopulation Variation Frequency of Human Inosine 5'-Monophosphate Dehydrogenase Type II (IMPDH2) Genetic Polymorphisms.	 	0.005639	1	1	IMPDH2
Pubmed	18212542	CD117 immunoreactivity in atypical fibroxanthoma.	 	0.005639	1	1	KIT
Pubmed	18762814	"Biopsy tissue microarray study of Ki-67 expression in untreated, localized prostate cancer managed by active surveillance."	 	0.005639	1	1	MKI67
Pubmed	15618474	KIT exon 8 mutations associated with core-binding factor (CBF)-acute myeloid leukemia (AML) cause hyperactivation of the receptor in response to stem cell factor.	 	0.005639	1	1	KIT
Pubmed	9099850	"nm23-H4, a new member of the family of human nm23/nucleoside diphosphate kinase genes localised on chromosome 16p13."	 	0.005639	1	1	NME4
Pubmed	14509668	Dystonia with and without deafness is caused by TIMM8A mutation.	 	0.005639	1	1	TIMM8A
Pubmed	18451232	Altered cytoplasmic-to-nuclear ratio of survivin is a prognostic indicator in breast cancer.	 	0.005639	1	1	BIRC5
Pubmed	17656368	"Forced expression of survivin-2B abrogates mitotic cells and induces mitochondria-dependent apoptosis by blockade of tubulin polymerization and modulation of Bcl-2, Bax, and survivin."	 	0.005639	1	1	BIRC5
Pubmed	17018686	Expression of c-kit in human osteosarcoma and its relevance as a prognostic marker.	 	0.005639	1	1	KIT
Pubmed	18695677	Phosphorylation of Plk1 at Ser326 regulates its functions during mitotic progression.	 	0.005639	1	1	PLK1
Pubmed	14757441	Protein expression of PDZ-binding kinase is up-regulated in hematologic malignancies and strongly down-regulated during terminal differentiation of HL-60 leukemic cells.	 	0.005639	1	1	PBK
Pubmed	366724	Human lysozyme (origin and distribution in health and disease).	 	0.005639	1	1	LYZ
Pubmed	16023673	Oxidative refolding of amyloidogenic variants of human lysozyme.	 	0.005639	1	1	LYZ
Pubmed	18423499	No somatic mutations detected in the Mad2 gene in 658 human tumors.	 	0.005639	1	1	MAD2L1
Pubmed	18787944	Lack of association of the HbE variant with protection from cerebral malaria in Thailand.	 	0.005639	1	1	HBE1
Pubmed	8765309	alpha-Lactalbumins and lysozymes.	 	0.005639	1	1	LYZ
Pubmed	9950165	Immunohistochemical analysis of the proliferation associated nuclear antigen CENP-F in non-Hodgkin's lymphoma.	 	0.005639	1	1	CENPF
Pubmed	11527208	Array analysis of the genes regulated during neuronal differentiation of human embryonal cells.	 	0.005639	1	1	TMSB10
Pubmed	10194364	Acid-base catalysis in the chemical mechanism of inosine monophosphate dehydrogenase.	 	0.005639	1	1	IMPDH2
Pubmed	17077982	Suppression of colorectal tumor growth by regulated survivin targeting.	 	0.005639	1	1	BIRC5
Pubmed	17546046	Expression of the RNA-binding protein IMP1 correlates with poor prognosis in ovarian carcinoma.	 	0.005639	1	1	IGF2BP1
Pubmed	1332671	Expression of CRABP-I and -II in human epidermal cells. Alteration of relative protein amounts is linked to the state of differentiation.	 	0.005639	1	1	RBP1
Pubmed	19140342	[Human RAD51 recombinase: the role in the cell cycle checkpoint and cellular survival]	 	0.005639	1	1	RAD51
Pubmed	17636189	Incidence of antiheparin-platelet factor 4 antibodies and heparin-induced thrombocytopenia in Turkish patients undergoing cardiac surgery.	 	0.005639	1	1	PF4
Pubmed	1713454	"Isolation of a cDNA clone, encoding a human beta-galactoside binding protein, overexpressed during glucocorticoid-induced cell death."	 	0.005639	1	1	LGALS1
Pubmed	16037384	Resveratrol regulates insulin-like growth factor-II in breast cancer cells.	 	0.005639	1	1	IGF2
Pubmed	19033926	Immunohistochemical expression of survivin in cutaneous sebaceous lesions.	 	0.005639	1	1	BIRC5
Pubmed	18622894	Expression and mutation analysis of the tyrosine kinase c-kit in poorly differentiated and anaplastic thyroid carcinoma.	 	0.005639	1	1	KIT
Pubmed	15457550	Expression of survivin in primary and metastatic gastric cancer cells obtained by laser capture microdissection.	 	0.005639	1	1	BIRC5
Pubmed	19452252	Absence of tumor-specific over-expression of Polo-like kinase 1 (Plk1) in major non-Hodgkin lymphoma and relatively low expression of Plk1 in nasal NK/T cell lymphoma.	 	0.005639	1	1	PLK1
Pubmed	16928224	Clinical implications of C-kit gene mutation in patients with large gastrointestinal stromal tumors.	 	0.005639	1	1	KIT
Pubmed	18080870	Glutathione-S-transferase protects against oxidative injury of endothelial cell tight junctions.	 	0.005639	1	1	GSTA4
Pubmed	12655561	A double missense variation of the BUB1 gene and a defective mitotic spindle checkpoint in the pancreatic cancer cell line Hs766T.	 	0.005639	1	1	BUB1
Pubmed	16227576	Caspase-mediated specific cleavage of BubR1 is a determinant of mitotic progression.	 	0.005639	1	1	BUB1B
Pubmed	19606696	[The role of RAD 51 gene polymorphism in patients with colorectal cancer in the Polish subpopulation]	 	0.005639	1	1	RAD51
Pubmed	19324875	Gene-specific transcriptional activation mediated by the p150 subunit of the chromatin assembly factor 1.	 	0.005639	1	1	CHAF1A
Pubmed	15474478	Molecular models of cyclin-dependent kinase 1 complexed with inhibitors.	 	0.005639	1	1	CDC2
Pubmed	15018431	Immunohistochemical evaluation of the c-kit proto-oncogene in sarcomas of the uterus: a case series.	 	0.005639	1	1	KIT
Pubmed	12826154	Predictive value of urinary retinol binding protein for graft dysfunction after kidney transplantation.	 	0.005639	1	1	RBP1
Pubmed	17241471	Analysis of mitotic phosphorylation of borealin.	 	0.005639	1	1	CDCA8
Pubmed	15309737	Expression of Survivin in pancreatic cancer and its correlation to expression of Bcl-2.	 	0.005639	1	1	BIRC5
Pubmed	18803637	Hypoxia-inducible enhancer/alpha-fetoprotein promoter-driven RNA interference targeting STK15 suppresses proliferation and induces apoptosis in human hepatocellular carcinoma cells.	 	0.005639	1	1	AURKA
Pubmed	15507672	"Demonstration that mast cells, T cells, and B cells bearing the activating kit mutation D816V occur in clusters within the marrow of patients with mastocytosis."	 	0.005639	1	1	KIT
Pubmed	16820881	Suppression of lung cancer with siRNA targeting PTTG.	 	0.005639	1	1	PTTG1
Pubmed	19258506	The putative tumor suppressor microRNA-101 modulates the cancer epigenome by repressing the polycomb group protein EZH2.	 	0.005639	1	1	EZH2
Pubmed	17110439	Structural features and restricted expression of a human alpha-tubulin gene.	 	0.005639	1	1	H2AFX
Pubmed	12535533	An ATR- and Cdc7-dependent DNA damage checkpoint that inhibits initiation of DNA replication.	 	0.005639	1	1	DBF4
Pubmed	9192843	Monoallelic expression of human PEG1/MEST is paralleled by parent-specific methylation in fetuses.	 	0.005639	1	1	MEST
Pubmed	16033063	Induction of apoptosis in human breast cancer and trophoblast tumor cells by galectin-1.	 	0.005639	1	1	LGALS1
Pubmed	18593915	NO signaling confers cytoprotectivity through the survivin network in ovarian carcinomas.	 	0.005639	1	1	BIRC5
Pubmed	18083840	Autophosphorylation-dependent activation of human Mps1 is required for the spindle checkpoint.	 	0.005639	1	1	TTK
Pubmed	12857880	Functional cdc25C dual-specificity phosphatase is required for S-phase entry in human cells.	 	0.005639	1	1	CDC25C
Pubmed	18767114	Association between polymorphisms in the GSTA4 gene and risk of lung cancer: A case-control study in a Southeastern Chinese population.	 	0.005639	1	1	GSTA4
Pubmed	9354806	A promoter mutation in the XIST gene in two unrelated families with skewed X-chromosome inactivation.	 	0.005639	1	1	XIST
Pubmed	11888845	Survivin: a novel neuroendocrine marker for pheochromocytoma.	 	0.005639	1	1	BIRC5
Pubmed	6184075	"Human spleen cysteineproteinase inhibitor. Purification, fractionation into isoelectric variants and some properties of the variants."	 	0.005639	1	1	CTSH
Pubmed	220950	A comparative study of the age-related patterns of decay of some nucleoside monophosphate kinases in human red cells.	 	0.005639	1	1	UCK2
Pubmed	2101838	Low quantities of Hb Boyle Heights or alpha 2(6)(A4)Asp----O beta 2 observed in three members of a Caucasian family.	 	0.005639	1	1	HBA2
Pubmed	17513602	Increased expression of cyclin B1 sensitizes prostate cancer cells to apoptosis induced by chemotherapy.	 	0.005639	1	1	CCNB1
Pubmed	19439469	Latency-associated nuclear antigen of Kaposi's sarcoma-associated herpesvirus (KSHV) upregulates survivin expression in KSHV-Associated B-lymphoma cells and contributes to their proliferation.	 	0.005639	1	1	BIRC5
Pubmed	12709681	Survivin - an anti-apoptosis protein: its biological roles and implications for cancer and beyond.	 	0.005639	1	1	BIRC5
Pubmed	10945994	Identification and characterization of the human ORC6 homolog.	 	0.005639	1	1	ORC6L
Pubmed	2849458	Molecular cloning and sequencing of a cDNA coding for mature human kidney cathepsin H.	 	0.005639	1	1	CTSH
Pubmed	12097379	Platelet factor 4 inhibits proliferation and cytokine release of activated human T cells.	 	0.005639	1	1	PF4
Pubmed	16151010	"Ongoing adaptive evolution of ASPM, a brain size determinant in Homo sapiens."	 	0.005639	1	1	ASPM
Pubmed	11893651	Oligonucleotide microarray analysis of lung adenocarcinoma in smokers and nonsmokers identifies GPC3 as a potential lung tumor suppressor.	 	0.005639	1	1	GPC3
Pubmed	18541649	Somatically acquired hypomethylation of IGF2 in breast and colorectal cancer.	 	0.005639	1	1	IGF2
Pubmed	3627112	"Deoxycytidylate deaminase activity in non-stimulated and phytohemagglutinin-stimulated human lymphocytes, and in leukemic cells."	 	0.005639	1	1	DCTD
Pubmed	15646835	Prion-like protein Doppel expression is not modified in scrapie-infected cells and in the brains of patients with Creutzfeldt-Jakob disease.	 	0.005639	1	1	CTSH
Pubmed	2450353	Isolation of an insulin-like growth factor II cDNA with a unique 5' untranslated region from human placenta.	 	0.005639	1	1	IGF2
Pubmed	14568928	Cross-linking of the mannose receptor on monocyte-derived dendritic cells activates an anti-inflammatory immunosuppressive program.	 	0.005639	1	1	MRC1
Pubmed	6876162	X-ray studies of water in crystals of lysozyme.	 	0.005639	1	1	LYZ
Pubmed	11585814	Effects of acetylation of histone H4 at lysines 8 and 16 on activity of the Hat1 histone acetyltransferase.	 	0.005639	1	1	HAT1
Pubmed	15294091	A mutation found in the promoter region of the human survivin gene is correlated to overexpression of survivin in cancer cells.	 	0.005639	1	1	BIRC5
Pubmed	16234514	"retrospective analysis of topoisomerase IIa amplifications and deletions as predictive markers in primary breast cancer patients randomly assigned to cyclophosphamide, methotrexate, and fluorouracil or cyclophosphamide, epirubicin, and fluorouracil: Danish Breast Cancer Cooperative Group."	 	0.005639	1	1	TOP2A
Pubmed	17581422	Glypican-3 expression in primary and recurrent ovarian carcinomas.	 	0.005639	1	1	GPC3
Pubmed	12564923	Low-temperature-induced structural changes in human lysozyme elucidated by three-dimensional NMR spectroscopy.	 	0.005639	1	1	LYZ
Pubmed	12356743	"Co-localization of centromere activity, proteins and topoisomerase II within a subdomain of the major human X alpha-satellite array."	 	0.005639	1	1	TOP2A
Pubmed	7585537	Selective use of an alternative stop codon and polyadenylation signal within intron sequences leads to a truncated topoisomerase II alpha messenger RNA and protein in human HL-60 leukemia cells selected for resistance to mitoxantrone.	 	0.005639	1	1	TOP2A
Pubmed	9683529	A comparative nuclear localization study of galectin-1 with other splicing components.	 	0.005639	1	1	LGALS1
Pubmed	18209471	KCNE3 mutation V17M identified in a patient with lone atrial fibrillation.	 	0.005639	1	1	KCNE3
Pubmed	11927556	Human Mps1 kinase is required for the spindle assembly checkpoint but not for centrosome duplication.	 	0.005639	1	1	TTK
Pubmed	17339586	Distal arthrogryposis and muscle weakness associated with a beta-tropomyosin mutation.	 	0.005639	1	1	TPM2
Pubmed	15579588	"The protein encoded by cancer/testis gene D40/AF15q14 is localized in spermatocytes, acrosomes of spermatids and ejaculated spermatozoa."	 	0.005639	1	1	CASC5
Pubmed	18502945	A novel 6C assay uncovers Polycomb-mediated higher order chromatin conformations.	 	0.005639	1	1	EZH2
Pubmed	12020816	Expression of the human homologue of the small nucleolar RNA-binding protein NHP2 gene during monocytic differentiation of U937 cells.	 	0.005639	1	1	NHP2
Pubmed	15062876	High expression of both mutant and wild-type alleles of c-kit in gastrointestinal stromal tumors.	 	0.005639	1	1	KIT
Pubmed	15481883	The region adjacent to the highly immunogenic site and shielded by the middle domain is responsible for self-oligomerization/client binding of the HSP90 molecular chaperone.	 	0.005639	1	1	HBA2
Pubmed	17964600	HMGB binding to DNA: single and double box motifs.	 	0.005639	1	1	HMGB2
Pubmed	16298817	"Deregulated NOTCH signaling in acute T-cell lymphoblastic leukemia/lymphoma: new insights, questions, and opportunities."	 	0.005639	1	1	NOTCH1
Pubmed	2334405	"Human carboxypeptidase E. Isolation and characterization of the cDNA, sequence conservation, expression and processing in vitro."	 	0.005639	1	1	CPE
Pubmed	1988759	Hemoglobin Columbia Missouri or alpha 2[88 (F9) Ala----Val]beta 2: a new high-oxygen-affinity hemoglobin that causes erythrocytosis.	 	0.005639	1	1	HBA2
Pubmed	18230152	"Overexpression of CDC2/CyclinB1 in gliomas, and CDC2 depletion inhibits proliferation of human glioma cells in vitro and in vivo."	 	0.005639	1	1	CDC2
Pubmed	15618926	c-kit expression in primary and metastatic merkel cell carcinoma.	 	0.005639	1	1	KIT
Pubmed	12553165	Brain iron homeostasis.	 	0.005639	1	1	TFRC
Pubmed	9425226	"Mutations in the BRCA1-associated RING domain (BARD1) gene in primary breast, ovarian and uterine cancers."	 	0.005639	1	1	BARD1
Pubmed	15516338	67-kDa laminin receptor promotes internalization of cytotoxic necrotizing factor 1-expressing Escherichia coli K1 into human brain microvascular endothelial cells.	 	0.005639	1	1	RPSA
Pubmed	19539329	Topoisomerase II alpha status in renal medullary carcinoma: immuno-expression and gene copy alterations of a potential target of therapy.	 	0.005639	1	1	TOP2A
Pubmed	17949778	Glypican-3 expression in benign liver tissue with active hepatitis C: implications for the diagnosis of hepatocellular carcinoma.	 	0.005639	1	1	GPC3
Pubmed	19034516	Upregulation of the cycline kinase subunit CKS2 increases cell proliferation rate in gastric cancer.	 	0.005639	1	1	CKS2
Pubmed	6994493	Development of a somatic mutation screening system using Hb mutants. IV. Successful detection of red cells containing the human frameshift mutants Hb Wayne and Hb Cranston using monospecific fluorescent antibodies.	 	0.005639	1	1	HBA2
Pubmed	15632137	Nuclear targeting and cell cycle regulatory function of human BARD1.	 	0.005639	1	1	BARD1
Pubmed	2325650	In vitro posttranslational modification of lamin B cloned from a human T-cell line.	 	0.005639	1	1	LMNB1
Pubmed	18231737	Association of the platelet membrane glycoprotein I a C807T gene polymorphism with aspirin resistance.	 	0.005639	1	1	ITGA2
Pubmed	7541721	Overexpression of the hyaluronan receptor RHAMM is transforming and is also required for H-ras transformation.	 	0.005639	1	1	HMMR
Pubmed	12023987	Promoter switch: a novel mechanism causing biallelic PEG1/MEST expression in invasive breast cancer.	 	0.005639	1	1	MEST
Pubmed	15512818	C-kit receptor (CD117) expression on plasma cells in monoclonal gammopathies.	 	0.005639	1	1	KIT
Pubmed	9629496	An alpha-thalassemic hemoglobinopathy: homozygosity for the HB Agrinio alpha 2-globin chain variant.	 	0.005639	1	1	HBA2
Pubmed	11049980	Imprinting of insulin-like growth factor 2 is modulated during hematopoiesis.	 	0.005639	1	1	IGF2
Pubmed	15054072	"Localization of the glutamine transporter SNAT1 in rat cerebral cortex and neighboring structures, with a note on its localization in human cortex."	 	0.005639	1	1	SLC38A1
Pubmed	10669749	Overexpression of kinase-associated phosphatase (KAP) in breast and prostate cancer and inhibition of the transformed phenotype by antisense KAP expression.	 	0.005639	1	1	CDKN3
Pubmed	19525235	The 3'-flap pocket of human flap endonuclease 1 is critical for substrate binding and catalysis.	 	0.005639	1	1	FEN1
Pubmed	19047562	New morphologic and genetic findings in cap disease associated with beta-tropomyosin (TPM2) mutations.	 	0.005639	1	1	TPM2
Pubmed	6574608	Structural gene coding for multifunctional protein carrying orotate phosphoribosyltransferase and OMP decarboxylase activity is located on long arm of human chromosome 3.	 	0.005639	1	1	UMPS
Pubmed	15638380	Macrophage/histiocytic antigen CD68 expression in neoplastic and reactive lymph nodes.	 	0.005639	1	1	CD68
Pubmed	11946554	A val-val sequence found in a human monocytic leukemia lysozyme.	 	0.005639	1	1	LYZ
Pubmed	16432873	Mutation screening in the human epsilon-globin gene using single-strand conformation polymorphism analysis.	 	0.005639	1	1	HBE1
Pubmed	16729972	Novel missense mutations (p.T596M and p.P1797H) in NOTCH1 in patients with bicuspid aortic valve.	 	0.005639	1	1	NOTCH1
Pubmed	15471556	c-kit gene mutations in intracranial germinomas.	 	0.005639	1	1	KIT
Pubmed	11186260	Hb Nikaia [alpha20(B1)His-Asp]: a new variant of the alpha2 gene.	 	0.005639	1	1	HBA2
Pubmed	18633435	Arsenite suppresses Notch1 signaling in human keratinocytes.	 	0.005639	1	1	NOTCH1
Pubmed	10559369	Cellular motor protein KIF-4 associates with retroviral Gag.	 	0.005639	1	1	KIF4A
Pubmed	11313869	Alternative splicing of the imprinted candidate tumor suppressor gene ZAC regulates its antiproliferative and DNA binding activities.	 	0.005639	1	1	PLAGL1
Pubmed	16926250	Pituitary tumor transforming gene (PTTG) stimulates thyroid cell proliferation via a vascular endothelial growth factor/kinase insert domain receptor/inhibitor of DNA binding-3 autocrine pathway.	 	0.005639	1	1	PTTG1
Pubmed	18600551	Human cytidine triphosphate synthetase 1 interacting proteins.	 	0.005639	1	1	CTPS
Pubmed	12544734	Ischaemic strokes and homozygosity for the alpha2 807T allele of the platelet collagen receptor in young monozygotic twins.	 	0.005639	1	1	ITGA2
Pubmed	11728454	Anti-apoptotic protein survivin plays a significant role in tubular morphogenesis of human coronary arteriolar endothelial cells by hypoxic preconditioning.	 	0.005639	1	1	BIRC5
Pubmed	19179970	Lysozyme and microbiota in relation to gingivitis and periodontitis.	 	0.005639	1	1	LYZ
Pubmed	8363049	Ultrastructural localization of a nuclear autoantigenic sperm protein in spermatogenic cells and spermatozoa.	 	0.005639	1	1	NASP
Pubmed	8786099	"Cloning and mapping of a novel human cDNA homologous to DROER, the enhancer of the Drosophila melanogaster rudimentary gene."	 	0.005639	1	1	ERH
Pubmed	12637748	Dissecting temporal and spatial control of cytokinesis with a myosin II Inhibitor.	 	0.005639	1	1	ANLN
Pubmed	12586340	Cyclin B1 transcription is enhanced by the p300 coactivator and regulated during the cell cycle by a CHR-dependent repression mechanism.	 	0.005639	1	1	CCNB1
Pubmed	9570563	The human S100 protein MRP-14 is a novel activator of the beta 2 integrin Mac-1 on neutrophils.	 	0.005639	1	1	S100A9
Pubmed	15037624	A mutation in human topoisomerase II alpha whose expression is lethal in DNA repair-deficient yeast cells.	 	0.005639	1	1	TOP2A
Pubmed	18633253	[Predictive value of orotate phosphoribosyltransferase in chemoresistant patients with gastric carcinoma who underwent S-1-based neoadjuvant/adjuvant chemotherapy]	 	0.005639	1	1	UMPS
Pubmed	16525660	Loss of imprinting in IGF2 in colorectal carcinoma assessed by microdissection.	 	0.005639	1	1	IGF2
Pubmed	17949790	Expression of glypican 3 in hepatoblastoma: an immunohistochemical study of 65 cases.	 	0.005639	1	1	GPC3
Pubmed	19033445	Deficiency in chromosome congression by the inhibition of Plk1 polo box domain-dependent recognition.	 	0.005639	1	1	PLK1
Pubmed	12711118	Frequent overexpression of the c-kit protein in large cell neuroendocrine carcinoma of the lung.	 	0.005639	1	1	KIT
Pubmed	18536724	Asymmetric bidirectional replication at the human DBF4 origin.	 	0.005639	1	1	DBF4
Pubmed	15813858	Co-inheritance of the Hb Sun Prairie mutation with a point mutation at 5'-UTR in the eastern Indian population.	 	0.005639	1	1	HBA2
Pubmed	6893554	Isolation and initial characterization of the single polypeptide that synthesizes uridine 5'-monophosphate from orotate in Ehrlich ascites carcinoma. Purification by tandem affinity chromatography of uridine-5'-monophosphate synthase.	 	0.005639	1	1	UMPS
Pubmed	9345911	Assignment of mitotic arrest deficient protein 2 (MAD2L1) to human chromosome band 5q23.3 by in situ hybridization.	 	0.005639	1	1	MAD2L1
Pubmed	11720479	Laminin-1-induced migration of multiple myeloma cells involves the high-affinity 67 kD laminin receptor.	 	0.005639	1	1	RPSA
Pubmed	7937751	Identification of genes expressed in premalignant breast disease by microscopy-directed cloning.	 	0.005639	1	1	RRM2
Pubmed	16926026	Human kinetochore-associated kinesin CENP-E visualized at 17 A resolution bound to microtubules.	 	0.005639	1	1	CENPE
Pubmed	17408908	Chk1 frameshift mutation in sporadic and hereditary non-polyposis colorectal cancers with microsatellite instability.	 	0.005639	1	1	CHEK1
Pubmed	11929532	"Molecular analysis of KTI12/TOT4, a Saccharomyces cerevisiae gene required for Kluyveromyces lactis zymocin action."	 	0.005639	1	1	KTI12
Pubmed	8864828	Cloning of candidate autoantigen carboxypeptidase H from a human islet library: sequence identity with human brain CPH.	 	0.005639	1	1	CPE
Pubmed	15611790	Expression of survivin and its splice variants survivin-2B and survivin-DeltaEx3 in breast cancer.	 	0.005639	1	1	BIRC5
Pubmed	17129782	Kinetochore microtubule dynamics and attachment stability are regulated by Hec1.	 	0.005639	1	1	NDC80
Pubmed	8940052	Delayed activation of the mannose receptor following synthesis. Requirement for exit from the endoplasmic reticulum.	 	0.005639	1	1	MRC1
Pubmed	12144065	"A hemoglobin variant found during glycohemoglobin measurement, identified as Hb Toulon [alpha77(EF6)Pro-->His] by tandem mass spectrometry."	 	0.005639	1	1	HBA2
Pubmed	15644775	KOC (K homology domain containing protein overexpressed in cancer): a novel molecular marker that distinguishes between benign and malignant lesions of the pancreas.	 	0.005639	1	1	IGF2BP3
Pubmed	16214181	"Mad2beta, an alternative variant of Mad2 reducing mitotic arrest and apoptosis induced by adriamycin in gastric cancer cells."	 	0.005639	1	1	MAD2L1
Pubmed	15024021	Polo-like kinase 1 (Plk1) inhibits p53 function by physical interaction and phosphorylation.	 	0.005639	1	1	PLK1
Pubmed	10631159	Isoform-specific imprinting of the human PEG1/MEST gene.	 	0.005639	1	1	MEST
Pubmed	19302711	Overexpression of UbcH10 alternates the cell cycle profile and accelerate the tumor proliferation in colon cancer.	 	0.005639	1	1	UBE2C
Pubmed	19390492	Paternal allele of IGF2 gene haplotype CTG is associated with fetal and placental growth in Japanese.	 	0.005639	1	1	IGF2
Pubmed	15964376	Ki-67 proliferation index in Kaposi's sarcoma after renal transplantation: findings in skin-only cases versus cases with internal-organ involvement.	 	0.005639	1	1	MKI67
Pubmed	15713655	Uncoupling anaphase-promoting complex/cyclosome activity from spindle assembly checkpoint control by deregulating polo-like kinase 1.	 	0.005639	1	1	PLK1
Pubmed	18597777	MAD2 interacts with DNA repair proteins and negatively regulates DNA damage repair.	 	0.005639	1	1	MAD2L1
Pubmed	10669757	Calcium depletion dissociates and activates heterodimeric notch receptors.	 	0.005639	1	1	NOTCH1
Pubmed	18077791	Ki-67 predicts outcome in advanced-stage mantle cell lymphoma patients treated with anti-CD20 immunochemotherapy: results from randomized trials of the European MCL Network and the German Low Grade Lymphoma Study Group.	 	0.005639	1	1	MKI67
Pubmed	19517793	[Regulation of neuronal development by the imprinted gene Necdin]	 	0.005639	1	1	NDN
Pubmed	11570981	Lack of correlation between Ki-67 labelling index and tumor size of anterior pituitary adenomas.	 	0.005639	1	1	MKI67
Pubmed	14599770	Homologous recombination and cell cycle checkpoints: Rad51 in tumour progression and therapy resistance.	 	0.005639	1	1	RAD51
Pubmed	15576031	Structural and functional properties of the human notch-1 ligand binding region.	 	0.005639	1	1	NOTCH1
Pubmed	10891391	"Cloning and functional expression of ATA1, a subtype of amino acid transporter A, from human placenta."	 	0.005639	1	1	SLC38A1
Pubmed	15194144	New KIT mutations in patients with piebaldism.	 	0.005639	1	1	KIT
Pubmed	10542310	Cloning and expression profile of human inorganic pyrophosphatase.	 	0.005639	1	1	PPA1
Pubmed	16551858	Polyclonal evolution of multiple secondary KIT mutations in gastrointestinal stromal tumors under treatment with imatinib mesylate.	 	0.005639	1	1	KIT
Pubmed	15326475	Survivin enhances radiation resistance in primary human glioblastoma cells via caspase-independent mechanisms.	 	0.005639	1	1	BIRC5
Pubmed	18036341	"Changes in cell morphology and cytoskeletal organization are induced by human mitotic checkpoint gene, Bub1."	 	0.005639	1	1	BUB1
Pubmed	19620409	Residual and recurrent gastrointestinal stromal tumors with KIT mutations: findings at first follow-up CT after imatinib treatment.	 	0.005639	1	1	KIT
Pubmed	17715390	Tissue-specific histone modification and transcription factor binding in alpha globin gene expression.	 	0.005639	1	1	HBA2
Pubmed	16767676	[The investigation of STK15 gene amplification and overexpression in laryngeal squamous cell carcinoma]	 	0.005639	1	1	AURKA
Pubmed	16557593	Alteration of subcellular and cellular expression patterns of cyclin B1 in renal cell carcinoma is significantly related to clinical progression and survival of patients.	 	0.005639	1	1	CCNB1
Pubmed	12034729	A spindle checkpoint arrest and a cytokinesis failure by the dominant-negative polo-box domain of Plk1 in U-2 OS cells.	 	0.005639	1	1	PLK1
Pubmed	11912127	An ATM-independent S-phase checkpoint response involves CHK1 pathway.	 	0.005639	1	1	CHEK1
Pubmed	17013808	Cyclin A but not cyclin D1 is essential for c-myc-modulated cell-cycle progression.	 	0.005639	1	1	CCNA2
Pubmed	18797476	Lactase persistence-related genetic variant: population substructure and health outcomes.	 	0.005639	1	1	MCM6
Pubmed	19592542	Clinical determinants of ckit-positive cardiac cell yield in coronary disease.	 	0.005639	1	1	KIT
Pubmed	18467708	Insulin-like growth factor-II is increased in systemic sclerosis-associated pulmonary fibrosis and contributes to the fibrotic process via Jun N-terminal kinase- and phosphatidylinositol-3 kinase-dependent pathways.	 	0.005639	1	1	IGF2
Pubmed	16012174	The identification of apoptosis-related residues in human thymosin beta-10 by mutational analysis and computational modeling.	 	0.005639	1	1	TMSB10
Pubmed	16213649	Self-association and DNA binding properties of the human topoisomerase IIA alpha2HTH module.	 	0.005639	1	1	TOP2A
Pubmed	11956246	Ectopic expression of KCNE3 accelerates cardiac repolarization and abbreviates the QT interval.	 	0.005639	1	1	KCNE3
Pubmed	3356192	Human cellular retinol-binding protein gene organization and chromosomal location.	 	0.005639	1	1	RBP1
Pubmed	8589724	Somatic c-KIT activating mutation in urticaria pigmentosa and aggressive mastocytosis: establishment of clonality in a human mast cell neoplasm.	 	0.005639	1	1	KIT
Pubmed	14966902	Expression of pituitary tumor transforming gene in human gastric carcinoma.	 	0.005639	1	1	PTTG1
Pubmed	16432240	Long-distance lateral diffusion of human Rad51 on double-stranded DNA.	 	0.005639	1	1	RAD51
Pubmed	16053917	Separation of bisdioxopiperazine- and vanadate resistance in topoisomerase II.	 	0.005639	1	1	TOP2A
Pubmed	2588347	[Cathepsin H activity in the human brain and human brain neoplasms]	 	0.005639	1	1	CTSH
Pubmed	17341657	Targeting survivin in cancer therapy: fulfilled promises and open questions.	 	0.005639	1	1	BIRC5
Pubmed	8971794	"Low stringency hybridization study of the dopamine D4 receptor revealed D4-like mRNA distribution of the orphan seven-transmembrane receptor, APJ, in human brain."	 	0.005639	1	1	APLNR
Pubmed	8276836	The human alpha 2 integrin gene promoter. Identification of positive and negative regulatory elements important for cell-type and developmentally restricted gene expression.	 	0.005639	1	1	ITGA2
Pubmed	2012175	Immunobiochemical and molecular biologic characterization of the cell proliferation-associated nuclear antigen that is defined by monoclonal antibody Ki-67.	 	0.005639	1	1	MKI67
Pubmed	18434581	Salivary lysozyme and prevalent hypertension.	 	0.005639	1	1	LYZ
Pubmed	18449208	Aberrant expression of Notch1 interferes with the B-lymphoid phenotype of neoplastic B cells in classical Hodgkin lymphoma.	 	0.005639	1	1	NOTCH1
Pubmed	9701554	Expanding the role of HsEg5 within the mitotic and post-mitotic phases of the cell cycle.	 	0.005639	1	1	KIF11
Pubmed	9601098	RCAS1 is associated with ductal breast cancer progression.	 	0.005639	1	1	HMMR
Pubmed	18039948	Genomic imbalances associated with mullerian aplasia.	 	0.005639	1	1	KLHL4
Pubmed	17125279	"1,4,5,6-tetrahydropyrrolo[3,4-c]pyrazoles: identification of a potent Aurora kinase inhibitor with a favorable antitumor kinase inhibition profile."	 	0.005639	1	1	AURKA
Pubmed	11134084	Human survivin is a kinetochore-associated passenger protein.	 	0.005639	1	1	BIRC5
Pubmed	19285711	Dendritic cells with transduced survivin gene induce specific cytotoxic T lymphocytes in human urologic cancer cell lines.	 	0.005639	1	1	BIRC5
Pubmed	16818689	Orotate phosphoribosyltransferase gene polymorphism predicts toxicity in patients treated with bolus 5-fluorouracil regimen.	 	0.005639	1	1	UMPS
Pubmed	9615237	Map location and gene structure of the Homo sapiens mitotic arrest deficient 2 (MAD2L1) gene at 4q27.	 	0.005639	1	1	MAD2L1
Pubmed	8943885	An IVS1-116 (A-->G) acceptor splice site mutation in the alpha 2 globin gene causing alpha + thalassaemia in two Dutch families.	 	0.005639	1	1	HBA2
Pubmed	3177365	Hemoglobin constant spring defined by specific oligonucleotide hybridization and hemoglobin D Punjab (beta 121----Gln) in a Batak Indonesian family.	 	0.005639	1	1	HBA2
Pubmed	8231732	Structure of the human gene for the neural phosphoprotein B-50 (GAP-43).	 	0.005639	1	1	GAP43
Pubmed	11744991	"Decreased nm23 expression, but not Ki-67 labeling index, is significantly correlated with lymph node metastasis of breast invasive ductal carcinoma."	 	0.005639	1	1	MKI67
Pubmed	1582498	Evidence for the extranuclear localization of thymosins in thymus.	 	0.005639	1	1	TMSB10
Pubmed	7499478	Cloning of the cDNA encoding human nonmuscle myosin heavy chain-B and analysis of human tissues with isoform-specific antibodies.	 	0.005639	1	1	MYH10
Pubmed	10319587	Isolation and characterization of a human cDNA homologous to the Xenopus laevis XCAP-C gene belonging to the structural maintenance of chromosomes (SMC) family.	 	0.005639	1	1	SMC4
Pubmed	12225794	Receptor for hyaluronan acid-mediated motility (RHAMM) is a new immunogenic leukemia-associated antigen in acute and chronic myeloid leukemia.	 	0.005639	1	1	HMMR
Pubmed	15254683	Thymosin beta-10 gene expression as a possible tool in diagnosis of thyroid neoplasias.	 	0.005639	1	1	TMSB10
Pubmed	12169736	"Orc6 involved in DNA replication, chromosome segregation, and cytokinesis."	 	0.005639	1	1	ORC6L
Pubmed	14699067	Role of the LTB4/BLT1 pathway in allergen-induced airway hyperresponsiveness and inflammation.	 	0.005639	1	1	BIRC5
Pubmed	15181147	Gene silencing of CENP-E by small interfering RNA in HeLa cells leads to missegregation of chromosomes after a mitotic delay.	 	0.005639	1	1	CENPE
Pubmed	18385756	Two cell lines of t(8;21) acute myeloid leukemia with activating KIT exon 17 mutation: models for the 'second hit' hypothesis.	 	0.005639	1	1	KIT
Pubmed	19165585	Beyond interstitial lung disease: the rapidly evolving role of Calgranulin B as a biomarker of systemic malignancies.	 	0.005639	1	1	S100A9
Pubmed	3380696	Isolation of cDNA coding for the placental protein 15 (PP15).	 	0.005639	1	1	NUTF2
Pubmed	11912137	Significance of MAD2 expression to mitotic checkpoint control in ovarian cancer cells.	 	0.005639	1	1	MAD2L1
Pubmed	15041727	Overexpression and amplification of Aurora-A in hepatocellular carcinoma.	 	0.005639	1	1	AURKA
Pubmed	16628005	Human Sgo1 is an excellent target for induction of apoptosis of transformed cells.	 	0.005639	1	1	SGOL1
Pubmed	18727058	Kinetics of H2AX phosphorylation after exposure to cisplatin.	 	0.005639	1	1	H2AFX
Pubmed	15709157	HCG up-regulates survivin mRNA in human granulosa cells.	 	0.005639	1	1	BIRC5
Pubmed	15650752	Notch1 antiapoptotic activity is abrogated by caspase cleavage in dying T lymphocytes.	 	0.005639	1	1	NOTCH1
Pubmed	12683998	The acetylatable lysines of human Fen1 are important for endo- and exonuclease activities.	 	0.005639	1	1	FEN1
Pubmed	11373325	"Immunohistochemical localization and comparison of carboxypeptidases D, E, and Z, alpha-MSH, ACTH, and MIB-1 between human anterior and corticotroph cell ""basophil invasion"" of the posterior pituitary."	 	0.005639	1	1	CPE
Pubmed	9042911	Molecular cloning of the human UMP synthase gene and characterization of point mutations in two hereditary orotic aciduria families.	 	0.005639	1	1	UMPS
Pubmed	15217948	Ki-67 staining index predicts distant metastasis and survival in locally advanced prostate cancer treated with radiotherapy: an analysis of patients in radiation therapy oncology group protocol 86-10.	 	0.005639	1	1	MKI67
Pubmed	18204432	IMP-3 is a novel progression marker in malignant melanoma.	 	0.005639	1	1	IGF2BP3
Pubmed	17591802	Aurora-A overexpression as an early marker of reflux-related columnar mucosa and Barrett's oesophagus.	 	0.005639	1	1	AURKA
Pubmed	18192885	CD117/KIT expression in pancreatic adenocarcinoma.	 	0.005639	1	1	KIT
Pubmed	17339271	Heritable rather than age-related environmental and stochastic factors dominate variation in DNA methylation of the human IGF2/H19 locus.	 	0.005639	1	1	IGF2
Pubmed	16914642	Salvicine functions as novel topoisomerase II poison by binding to ATP pocket.	 	0.005639	1	1	TOP2A
Pubmed	17922014	Network modeling links breast cancer susceptibility and centrosome dysfunction.	 	0.005639	1	1	HMMR
Pubmed	9197538	Analysis of an expression profile of genes in the human adipose tissue.	 	0.005639	1	1	CPE
Pubmed	16786129	Acquired resistance to imatinib and secondary KIT exon 13 mutation in gastrointestinal stromal tumour.	 	0.005639	1	1	KIT
Pubmed	18177730	Association of transient receptor potential canonical type 3 (TRPC3) channel transcripts with proinflammatory cytokines.	 	0.005639	1	1	TRPC3
Pubmed	15870910	Melanin-concentrating hormone enhances sucrose intake.	 	0.005639	1	1	PMCH
Pubmed	16011022	Linkage disequilibrium and haplotype analysis of two single nucleotide polymorphisms in STK15 in Chinese.	 	0.005639	1	1	AURKA
Pubmed	17177840	Increased expression of galectin-1 during the progression of cervical neoplasia.	 	0.005639	1	1	LGALS1
Pubmed	12068134	Expression of cyclin B1 and cdc2 in nodal non-Hodgkin's lymphoma and its prognostic implications.	 	0.005639	1	1	CCNB1
Pubmed	15350223	Polo-like kinase-1 controls recovery from a G2 DNA damage-induced arrest in mammalian cells.	 	0.005639	1	1	PLK1
Pubmed	9438854	Gain-of-function mutations of c-kit in human gastrointestinal stromal tumors.	 	0.005639	1	1	KIT
Pubmed	17905101	Survivin expression in patients with non-muscle-invasive urothelial cell carcinoma of the bladder.	 	0.005639	1	1	BIRC5
Pubmed	19192721	Expression of insulin-like growth factor-II mRNA binding protein 3 (IMP3) in osteosarcoma.	 	0.005639	1	1	IGF2BP3
Pubmed	16427610	Rad51-related changes in global gene expression.	 	0.005639	1	1	RAD51
Pubmed	1534510	Cloning of 67-kDa laminin receptor cDNA and gene expression in normal and malignant cell lines of the human lung.	 	0.005639	1	1	RPSA
Pubmed	10825657	First report of polymorphisms in the prion-like protein gene (PRND): implications for human prion diseases.	 	0.005639	1	1	PRND
Pubmed	9214649	Second pathway for completion of human DNA base excision-repair: reconstitution with purified proteins and requirement for DNase IV (FEN1).	 	0.005639	1	1	FEN1
Pubmed	15592459	The human mitotic checkpoint protein BubR1 regulates chromosome-spindle attachments.	 	0.005639	1	1	BUB1B
Pubmed	17157856	Role of glycoprotein Ia gene polymorphisms in determining platelet function in myocardial infarction patients undergoing percutaneous coronary intervention on dual antiplatelet treatment.	 	0.005639	1	1	ITGA2
Pubmed	12467231	Synergistic interaction of lovastatin and paclitaxel in human cancer cells.	 	0.005639	1	1	CENPF
Pubmed	19688976	Intracellular glycoproteins binding galectin-1 in thyroid lesions.	 	0.005639	1	1	LGALS1
Pubmed	16644787	Transcriptional expression of survivin and its splice variants in endometriosis.	 	0.005639	1	1	BIRC5
Pubmed	8680409	A 12-bp deletion (7818del12) in the c-kit protooncogene in a large Italian kindred with piebaldism.	 	0.005639	1	1	KIT
Pubmed	17054380	Structural analysis of human lysozyme using molecular dynamics simulations.	 	0.005639	1	1	LYZ
Pubmed	17172412	Histone deacetylase inhibitors deplete enhancer of zeste 2 and associated polycomb repressive complex 2 proteins in human acute leukemia cells.	 	0.005639	1	1	EZH2
Pubmed	12745091	Expression and phosphorylation of the replication regulator protein geminin.	 	0.005639	1	1	GMNN
Pubmed	12099692	Human CDC25B and CDC25C differ by their ability to restore a functional checkpoint response after gene replacement in fission yeast.	 	0.005639	1	1	CDC25C
Pubmed	18336887	Gene expression of survivin and its spliced isoforms associated with proliferation and aggressive phenotypes of prostate cancer.	 	0.005639	1	1	BIRC5
Pubmed	14978217	Human topoisomerase IIalpha: targeting to subchromosomal sites of activity during interphase and mitosis.	 	0.005639	1	1	TOP2A
Pubmed	16304451	Alpha 2 integrin +807 polymorphism in drug-induced gingival overgrowth.	 	0.005639	1	1	ITGA2
Pubmed	17322106	Gene expression analysis of hematopoietic progenitor cells identifies Dlg7 as a potential stem cell gene.	 	0.005639	1	1	DLGAP5
Pubmed	9363944	CENP-E is a plus end-directed kinetochore motor required for metaphase chromosome alignment.	 	0.005639	1	1	CENPE
Pubmed	16173017	Hepatitis B virus X protein upregulates survivin expression in hepatoma tissues.	 	0.005639	1	1	BIRC5
Pubmed	16950794	Separating the anti-apoptotic and mitotic roles of survivin.	 	0.005639	1	1	BIRC5
Pubmed	15326200	Human chromokinesin KIF4A functions in chromosome condensation and segregation.	 	0.005639	1	1	KIF4A
Pubmed	16112668	"Shugoshin, a guardian for sister chromatid segregation."	 	0.005639	1	1	SGOL1
Pubmed	15860351	"AURKA amplification, chromosome instability, and centrosome abnormality in human pancreatic carcinoma cells."	 	0.005639	1	1	AURKA
Pubmed	15015605	Polo-like kinase 1 (PLK1) expression is associated with cell proliferative activity and cdc2 expression in malignant lymphoma of the thyroid.	 	0.005639	1	1	PLK1
Pubmed	18544565	"Involvement of Rad51 in cytotoxicity induced by epidermal growth factor receptor inhibitor (gefitinib, IressaR) and chemotherapeutic agents in human lung cancer cells."	 	0.005639	1	1	RAD51
Pubmed	1487423	A Canadian family with Hb Wayne; characterization by HPLC and DNA sequencing.	 	0.005639	1	1	HBA2
Pubmed	17276133	Heat shock does not induce gammaH2AX foci formation but protects cells from N-methyl-N'-nitro-N-nitrosoguanidine-induced genotoxicity.	 	0.005639	1	1	H2AFX
Pubmed	18402387	DNA topoisomerase II-alpha as a proliferation marker in human gliomas: correlation with PCNA expression and patient survival.	 	0.005639	1	1	TOP2A
Pubmed	17965221	"c-KIT overexpression, without gene amplification and mutation, in paediatric renal tumours."	 	0.005639	1	1	KIT
Pubmed	15767290	The human macrophage mannose receptor is not a professional phagocytic receptor.	 	0.005639	1	1	MRC1
Pubmed	2207098	1H NMR studies of human lysozyme: spectral assignment and comparison with hen lysozyme.	 	0.005639	1	1	LYZ
Pubmed	18278445	Antisense RNA of survivin gene inhibits the proliferation of leukemia cells and sensitizes leukemia cell line to taxol-induced apoptosis.	 	0.005639	1	1	BIRC5
Pubmed	18158243	"Anillin is a scaffold protein that links RhoA, actin, and myosin during cytokinesis."	 	0.005639	1	1	ANLN
Pubmed	12551974	Human cytomegalovirus infection leads to accumulation of geminin and inhibition of the licensing of cellular DNA replication.	 	0.005639	1	1	GMNN
Pubmed	18457664	Accumulation of DSBs in gamma-H2AX domains fuel chromosomal aberrations.	 	0.005639	1	1	H2AFX
Pubmed	17919721	Placental IGF2 expression in normal and intrauterine growth restricted (IUGR) pregnancies.	 	0.005639	1	1	IGF2
Pubmed	19458358	Polo-like kinase 1 is overexpressed in acute myeloid leukemia and its inhibition preferentially targets the proliferation of leukemic cells.	 	0.005639	1	1	PLK1
Pubmed	12134042	"Kaposi's sarcoma-associated herpesvirus-induced upregulation of the c-kit proto-oncogene, as identified by gene expression profiling, is essential for the transformation of endothelial cells."	 	0.005639	1	1	KIT
Pubmed	11438594	"alpha2-chimaerin, a Cdc42/Rac1 regulator, is selectively expressed in the rat embryonic nervous system and is involved in neuritogenesis in N1E-115 neuroblastoma cells."	 	0.005639	1	1	CHN1
Pubmed	15099518	Different EZH2-containing complexes target methylation of histone H1 or nucleosomal histone H3.	 	0.005639	1	1	EZH2
Pubmed	17720713	Sequence occurrence and structural uniqueness of a G-quadruplex in the human c-kit promoter.	 	0.005639	1	1	KIT
Pubmed	18596031	"NK314, a topoisomerase II inhibitor that specifically targets the alpha isoform."	 	0.005639	1	1	TOP2A
Pubmed	6808517	Enkephalin convertase: purification and characterization of a specific enkephalin-synthesizing carboxypeptidase localized to adrenal chromaffin granules.	 	0.005639	1	1	CPE
Pubmed	2587265	"Nucleotide sequence of human preprocathepsin H, a lysosomal cysteine proteinase."	 	0.005639	1	1	CTSH
Pubmed	15944450	Human Rad51 filaments on double- and single-stranded DNA: correlating regular and irregular forms with recombination function.	 	0.005639	1	1	RAD51
Pubmed	18278438	A phase 2 consortium (P2C) trial of 3-aminopyridine-2-carboxaldehyde thiosemicarbazone (3-AP) for advanced adenocarcinoma of the pancreas.	 	0.005639	1	1	RRM2
Pubmed	18579154	Cobalt and the iron acquisition pathway: competition towards interaction with receptor 1.	 	0.005639	1	1	TFRC
Pubmed	18019715	"A novel anti-cancer substance, MK615, from ume, a variety of Japanese apricot, inhibits growth of hepatocellular carcinoma cells by suppressing Aurora A kinase activity."	 	0.005639	1	1	AURKA
Pubmed	18791270	Overexpression of the mitotic checkpoint genes BUB1 and BUBR1 is associated with genomic complexity in clear cell kidney carcinomas.	 	0.005639	1	1	BUB1
Pubmed	16158051	Inhibition of Aurora A in response to DNA damage.	 	0.005639	1	1	AURKA
Pubmed	15545971	Ki-67 expression and patients survival in lung cancer: systematic review of the literature with meta-analysis.	 	0.005639	1	1	MKI67
Pubmed	17399677	Molecular haplotyping of tandem single nucleotide polymorphisms by allele-specific PCR.	 	0.005639	1	1	BARD1
Pubmed	19152245	Clonal analysis of gastric carcinoma and precancerous lesions and its relation to Ki-67 protein expression.	 	0.005639	1	1	MKI67
Pubmed	17525721	N822 mutation of KIT gene was frequent in pediatric acute myeloid leukemia patients with t(8;21) in Japan: a study of the Japanese childhood AML cooperative study group.	 	0.005639	1	1	KIT
Pubmed	8824816	Mapping of the human HMG2 gene to 4q31.	 	0.005639	1	1	HMGB2
Pubmed	15158633	Genomic imprinting in disruptive spermatogenesis.	 	0.005639	1	1	H19
Pubmed	15289843	Amplification/overexpression of Aurora-A in human gastric carcinoma: potential role in differentiated type gastric carcinogenesis.	 	0.005639	1	1	AURKA
Pubmed	14676801	Survivin expression in oral squamous cell carcinoma.	 	0.005639	1	1	BIRC5
Pubmed	12071581	Influence of endurance exercise (triathlon) on circulating transferrin receptors and other indicators of iron status in female athletes.	 	0.005639	1	1	TFRC
Pubmed	16461284	Cooperation between mitotic kinesins controls the late stages of cytokinesis.	 	0.005639	1	1	KIF23
Pubmed	11371342	Securin is required for chromosomal stability in human cells.	 	0.005639	1	1	PTTG1
Pubmed	15592449	Novel function of the flap endonuclease 1 complex in processing stalled DNA replication forks.	 	0.005639	1	1	FEN1
Pubmed	17450433	Silver-Russell syndrome in a girl born after in vitro fertilization: partial hypermethylation at the differentially methylated region of PEG1/MEST.	 	0.005639	1	1	MEST
Pubmed	17457043	High copy amplification of the Aurora-A gene is associated with chromosomal instability phenotype in human colorectal cancers.	 	0.005639	1	1	AURKA
Pubmed	11896577	"Centrosome overduplication, increased ploidy and transformation in cells expressing endoplasmic reticulum-associated cyclin A2."	 	0.005639	1	1	CCNA2
Pubmed	17167759	Nuclear expression of survivin is associated with improved survival in metastatic ovarian carcinoma.	 	0.005639	1	1	BIRC5
Pubmed	2327986	A point mutation in the cytoplasmic domain of the transferrin receptor inhibits endocytosis.	 	0.005639	1	1	TFRC
Pubmed	18418076	Targeting Plk1 to chromosome arms and regulating chromosome compaction by the PICH ATPase.	 	0.005639	1	1	ERCC6L
Pubmed	16671090	Survivin in esophageal cancer: An accurate prognostic marker for squamous cell carcinoma but not adenocarcinoma.	 	0.005639	1	1	BIRC5
Pubmed	18481171	The BARD1 Cys557Ser polymorphism and breast cancer risk: an Australian case-control and family analysis.	 	0.005639	1	1	BARD1
Pubmed	18166587	Secretory IgA mediates retrotranscytosis of intact gliadin peptides via the transferrin receptor in celiac disease.	 	0.005639	1	1	TFRC
Pubmed	15583029	DNA replication checkpoint control of Wee1 stability by vertebrate Hsl7.	 	0.005639	1	1	WEE1
Pubmed	18777195	Notch1 expression in colorectal carcinoma determines tumor differentiation status.	 	0.005639	1	1	NOTCH1
Pubmed	8511754	The effect of secreted heparin-binding proteins on heparin binding to platelets.	 	0.005639	1	1	PF4
Pubmed	18836484	"GAS5, a non-protein-coding RNA, controls apoptosis and is downregulated in breast cancer."	 	0.005639	1	1	GAS5
Pubmed	8733041	Localisation of two candidate genes for mental retardation using a YAC physical map of the Xq21.1-21.2 subbands.	 	0.005639	1	1	ZNF711
Pubmed	17328950	Survivin and EPR-1 expression in acute leukemias: prognostic significance and review of the literature.	 	0.005639	1	1	BIRC5
Pubmed	17559540	Clinicopathological significance of survivin expression in patients with hepatocellular carcinoma.	 	0.005639	1	1	BIRC5
Pubmed	1517104	HB Prato [alpha 31(B12)Arg----Ser] in a Calabrian family.	 	0.005639	1	1	HBA2
Pubmed	18592370	The prognostic significance of Ki67 before and after neoadjuvant chemotherapy in breast cancer.	 	0.005639	1	1	MKI67
Pubmed	16629903	Sub-nuclear localization of Rad51 in response to DNA damage.	 	0.005639	1	1	RAD51
Pubmed	18485461	Gene expression study of Aurora-A reveals implication during bladder carcinogenesis and increasing values in invasive urothelial cancer.	 	0.005639	1	1	AURKA
Pubmed	12960092	Overexpressed pituitary tumor-transforming gene causes aneuploidy in live human cells.	 	0.005639	1	1	PTTG1
Pubmed	12532445	Expression of IGF-II in early experimental hepatocellular carcinomas and its significance in early diagnosis.	 	0.005639	1	1	IGF2
Pubmed	15141022	Identification of human polo-like kinase 1 as a potential therapeutic target in pancreatic cancer.	 	0.005639	1	1	PLK1
Pubmed	10606637	Members of the SRY family regulate the human LINE retrotransposons.	 	0.005639	1	1	SOX11
Pubmed	11712083	Changes in survivin messenger RNA level during cisplatin treatment in gastric cancer.	 	0.005639	1	1	BIRC5
Pubmed	15855824	Overexpression of Polo-like kinase 1 is a common and early event in pancreatic cancer.	 	0.005639	1	1	PLK1
Pubmed	18766971	The identification and characterisation of novel KIT transcripts in aggressive mast cell malignancies and normal CD34+ cells.	 	0.005639	1	1	KIT
Pubmed	19293570	Inherited and Sporadic Epimutations at the IGF2-H19 locus in Beckwith-Wiedemann syndrome and Wilms' tumor.	 	0.005639	1	1	IGF2
Pubmed	14617626	Presentation of galectin-1 by extracellular matrix triggers T cell death.	 	0.005639	1	1	LGALS1
Pubmed	18553460	Silencing survivin gene expression promotes apoptosis of human breast cancer cells through a caspase-independent pathway.	 	0.005639	1	1	BIRC5
Pubmed	17978170	"RHAMM-R3 peptide vaccination in patients with acute myeloid leukemia, myelodysplastic syndrome, and multiple myeloma elicits immunologic and clinical responses."	 	0.005639	1	1	HMMR
Pubmed	12740395	M phase phosphoprotein 1 is a human plus-end-directed kinesin-related protein required for cytokinesis.	 	0.005639	1	1	KIF20B
Pubmed	7506248	Characterization of the promoter region of the human c-kit proto-oncogene.	 	0.005639	1	1	KIT
Pubmed	2289011	Characterization of a sperm-specific nuclear autoantigenic protein. II. Expression and localization in the testis.	 	0.005639	1	1	NASP
Pubmed	18976006	Glypican-3 as a useful diagnostic marker that distinguishes hepatocellular carcinoma from benign hepatocellular mass lesions.	 	0.005639	1	1	GPC3
Pubmed	8166723	Molecular analysis of a potentially phorbol-regulatable region of the human topoisomerase II alpha gene promoter.	 	0.005639	1	1	TOP2A
Pubmed	16412566	Functional polymorphism 57Val>Ile of aurora kinase A associated with increased risk of gastric cancer progression.	 	0.005639	1	1	AURKA
Pubmed	17874453	Aggressive Langerhans cell histiocytosis following T-ALL: clonally related neoplasms with persistent expression of constitutively active NOTCH1.	 	0.005639	1	1	NOTCH1
Pubmed	18802780	Common genetic polymorphisms of AURKA and prostate cancer risk.	 	0.005639	1	1	AURKA
Pubmed	19028728	The molecular landscape of ASPM mutations in primary microcephaly.	 	0.005639	1	1	ASPM
Pubmed	19232520	Expression of STK15 mRNA in hepatocellular carcinoma and its prognostic significance.	 	0.005639	1	1	AURKA
Pubmed	15247330	Tissue-specific and imprinted epigenetic modifications of the human NDN gene.	 	0.005639	1	1	NDN
Pubmed	11927576	Positive contribution of hydration structure on the surface of human lysozyme to the conformational stability.	 	0.005639	1	1	LYZ
Pubmed	12082532	Tumour specific promoter region methylation of the human homologue of the Drosophila Roundabout gene DUTT1 (ROBO1) in human cancers.	 	0.005639	1	1	ROBO1
Pubmed	14583779	Nuclear expression of Survivin in paediatric ependymomas and choroid plexus tumours correlates with morphologic tumour grade.	 	0.005639	1	1	BIRC5
Pubmed	19141287	The crystal structure of the N-terminal region of BUB1 provides insight into the mechanism of BUB1 recruitment to kinetochores.	 	0.005639	1	1	BUB1
Pubmed	17337592	Hypoxic preconditioning protects human brain endothelium from ischemic apoptosis by Akt-dependent survivin activation.	 	0.005639	1	1	BIRC5
Pubmed	12730694	Transcription of antisense RNA leading to gene silencing and methylation as a novel cause of human genetic disease.	 	0.005639	1	1	HBA2
Pubmed	18084619	Effects of recombinant erythropoietin on breast cancer-initiating cells.	 	0.005639	1	1	NOTCH1
Pubmed	12615673	Enzymatically modified LDL induces cathepsin H in human monocytes: potential relevance in early atherogenesis.	 	0.005639	1	1	CTSH
Pubmed	12854136	Expression of survivin in human gastric carcinoma and gastric carcinoma model of rats.	 	0.005639	1	1	BIRC5
Pubmed	17898866	Functional analysis of the Aurora Kinase A Ile31 allelic variant in human prostate.	 	0.005639	1	1	AURKA
Pubmed	14769876	Galectin-1 induces cell adhesion to the extracellular matrix and apoptosis of non-adherent human colon cancer Colo201 cells.	 	0.005639	1	1	LGALS1
Pubmed	17486499	A moderately severe alpha-thalassemia condition resulting from a combination of the alpha2 polyadenylation signal (AATAAA-->AATA- -) mutation and a 3.7 Kb alpha gene deletion in an Australian family.	 	0.005639	1	1	HBA2
Pubmed	7507133	The expression of c-kit protein in human adult and fetal tissues.	 	0.005639	1	1	KIT
Pubmed	15831461	"Inhibition of human Chk1 causes increased initiation of DNA replication, phosphorylation of ATR targets, and DNA breakage."	 	0.005639	1	1	CHEK1
Pubmed	12918066	Deletion of Trp-557 and Lys-558 in the juxtamembrane domain of the c-kit protooncogene is associated with metastatic behavior of gastrointestinal stromal tumors.	 	0.005639	1	1	KIT
Pubmed	9029028	A new c-kit mutation in a case of aggressive mast cell disease.	 	0.005639	1	1	KIT
Pubmed	16809406	The emerging role of pituitary tumor transforming gene in tumorigenesis.	 	0.005639	1	1	PTTG1
Pubmed	15112348	C-kit gene mutation in human gastrointestinal stromal tumors.	 	0.005639	1	1	KIT
Pubmed	18337469	Prolyl hydroxylase PHD3 activates oxygen-dependent protein aggregation.	 	0.005639	1	1	EGLN3
Pubmed	18701505	Aging and cancer-related loss of insulin-like growth factor 2 imprinting in the mouse and human prostate.	 	0.005639	1	1	IGF2
Pubmed	9782087	Cloning and mapping of the UNC5C gene to human chromosome 4q21-q23.	 	0.005639	1	1	UNC5C
Pubmed	10612291	Protein abundance alterations in matched sets of macroscopically normal colon mucosa and colorectal carcinoma.	 	0.005639	1	1	S100A9
Pubmed	18570881	A Rad51 presynaptic filament is sufficient to capture nucleosomal homology during recombinational repair of a DNA double-strand break.	 	0.005639	1	1	RAD51
Pubmed	17904670	Residual gammaH2AX after irradiation of human lymphocytes and monocytes in vitro and its relation to late effects after prostate brachytherapy.	 	0.005639	1	1	H2AFX
Pubmed	12532332	Differential regulation of Notch signal transduction in leukaemia and lymphoma cells in culture.	 	0.005639	1	1	NOTCH1
Pubmed	16152612	Aberrant expression of BARD1 in breast and ovarian cancers with poor prognosis.	 	0.005639	1	1	BARD1
Pubmed	9268648	Mapping of the human DNA primase 1 (PRIM1) to chromosome 12q13.	 	0.005639	1	1	PRIM1
Pubmed	14582704	34-BetaE12 expression in benign and premalignant squamous lesions of skin: relation to cell proliferation (Ki-67).	 	0.005639	1	1	MKI67
Pubmed	19680269	Validation of the association between AGTRL1 polymorphism and coronary artery disease in the Japanese and Korean populations.	 	0.005639	1	1	APLNR
Pubmed	9679058	Control of cyclin B1 localization through regulated binding of the nuclear export factor CRM1.	 	0.005639	1	1	CCNB1
Pubmed	15774577	Cell-autonomous notch signaling regulates endothelial cell branching and proliferation during vascular tubulogenesis.	 	0.005639	1	1	NOTCH1
Pubmed	2229063	Serum transferrin receptor is a truncated form of tissue receptor.	 	0.005639	1	1	TFRC
Pubmed	17107915	NOTCH1 mutations are rare in acute myeloid leukemia.	 	0.005639	1	1	NOTCH1
Pubmed	19091954	Essential function of Chk1 can be uncoupled from DNA damage checkpoint and replication control.	 	0.005639	1	1	CHEK1
Pubmed	15933804	Polymorphisms at codons 56 and 174 of the prion-like protein gene (PRND) are not associated with sporadic Creutzfeldt-Jakob disease.	 	0.005639	1	1	PRND
Pubmed	17998245	Platelet factor-4 is an indicator of blood count recovery in acute myeloid leukemia patients in complete remission.	 	0.005639	1	1	PF4
Pubmed	2268301	Human brain n-chimaerin cDNA encodes a novel phorbol ester receptor.	 	0.005639	1	1	CHN1
Pubmed	16525508	Determinants of conformational dimerization of Mad2 and its inhibition by p31comet.	 	0.005639	1	1	MAD2L1
Pubmed	11986308	Arginine residues 47 and 70 of human flap endonuclease-1 are involved in DNA substrate interactions and cleavage site determination.	 	0.005639	1	1	FEN1
Pubmed	17046738	"Expression of constitutively active Notch1 in male genital tracts results in ectopic growth and blockage of efferent ducts, epididymal hyperplasia and sterility."	 	0.005639	1	1	NOTCH1
Pubmed	18614046	The kleisin subunit of cohesin dictates damage-induced cohesion.	 	0.005639	1	1	CHEK1
Pubmed	18334114	[Correlation of -31G/C polymorphisms of survivin promoter to tumorigenesis of gastric carcinoma]	 	0.005639	1	1	BIRC5
Pubmed	11483240	Central and peripheral dysregulation of melanin-concentrating hormone in obese Zucker rats.	 	0.005639	1	1	PMCH
Pubmed	18269348	"The 67 kDa laminin receptor: structure, function and role in disease."	 	0.005639	1	1	RPSA
Pubmed	18824478	Hairpin structures formed by alpha satellite DNA of human centromeres are cleaved by human topoisomerase IIalpha.	 	0.005639	1	1	TOP2A
Pubmed	10876248	Structure of the human anti-apoptotic protein survivin reveals a dimeric arrangement.	 	0.005639	1	1	BIRC5
Pubmed	12885269	Melanin-concentrating hormone functions in the nervous system: food intake and stress.	 	0.005639	1	1	PMCH
Pubmed	3365256	Sequence of a human kidney cDNA clone encoding thymosin beta 10.	 	0.005639	1	1	TMSB10
Pubmed	12429798	Circadian variation of topoisomerase II-alpha in human rectal crypt epithelium: implications for reduction of toxicity of chemotherapy.	 	0.005639	1	1	TOP2A
Pubmed	17097061	The mitotic phosphatase cdc25C at the Golgi apparatus.	 	0.005639	1	1	CDC25C
Pubmed	9452451	The transfer of retinol from serum retinol-binding protein to cellular retinol-binding protein is mediated by a membrane receptor.	 	0.005639	1	1	RBP1
Pubmed	15351208	Characterization of a nuclear localization signal in the C-terminus of the adeno-associated virus Rep68/78 proteins.	 	0.005639	1	1	KPNA2
Pubmed	7843284	Structure and growth-dependent regulation of the human cyclin B1 promoter.	 	0.005639	1	1	CCNB1
Pubmed	9136890	Structure of human transferrin receptor oligosaccharides: conservation of site-specific processing.	 	0.005639	1	1	TFRC
Pubmed	2350545	Primary structure of non-histone chromosomal protein HMG2 revealed by the nucleotide sequence.	 	0.005639	1	1	HMGB3
Pubmed	18445768	Overexpression of transferrin receptor and ferritin related to clinical symptoms and destabilization of human carotid plaques.	 	0.005639	1	1	TFRC
Pubmed	14678992	Notch1 signaling inhibits growth of human hepatocellular carcinoma through induction of cell cycle arrest and apoptosis.	 	0.005639	1	1	NOTCH1
Pubmed	12033261	Residue-specific mass signatures for the efficient detection of protein modifications by mass spectrometry.	 	0.005639	1	1	H2AFX
Pubmed	9715689	Age-related macular degeneration. Clinical features in a large family and linkage to chromosome 1q.	 	0.005639	1	1	HMCN1
Pubmed	19651821	Intercellular communication of cellular stress monitored by gamma-H2AX induction.	 	0.005639	1	1	H2AFX
Pubmed	15130468	"Structural basis for the specificity, catalysis, and regulation of human uridine-cytidine kinase."	 	0.005639	1	1	UCK2
Pubmed	10888890	Loss-of-function mutations in TYROBP (DAP12) result in a presenile dementia with bone cysts.	 	0.005639	1	1	TYROBP
Pubmed	15481895	"An alpha-thalassemia phenotype in a Dutch Hindustani, caused by a new point mutation that creates an alternative splice donor site in the first exon of the alpha2-globin gene."	 	0.005639	1	1	HBA2
Pubmed	17556008	Identification of BARD1 splice-isoforms involved in human trophoblast invasion.	 	0.005639	1	1	BARD1
Pubmed	15078988	"The mitotic serine threonine kinase, Aurora-2, is a potential target for drug development in human pancreatic cancer."	 	0.005639	1	1	AURKA
Pubmed	15670151	"Modulation of IMPDH2, survivin, topoisomerase I and vimentin increases sensitivity to methotrexate in HT29 human colon cancer cells."	 	0.005639	1	1	IMPDH2
Pubmed	8424751	Structural analysis of the human insulin-like growth factor-II P3 promoter.	 	0.005639	1	1	IGF2
Pubmed	17360361	Noninfectious entry of HIV-1 into peripheral and brain macrophages mediated by the mannose receptor.	 	0.005639	1	1	MRC1
Pubmed	9463329	"Assignment of the locus for PLO-SL, a frontal-lobe dementia with bone cysts, to 19q13."	 	0.005639	1	1	TYROBP
Pubmed	11958416	Topoisomerase II alpha as a reliable proliferation marker in meningiomas.	 	0.005639	1	1	TOP2A
Pubmed	16857788	Hypomethylated P4 promoter induces expression of the insulin-like growth factor-II gene in hepatocellular carcinoma in a Chinese population.	 	0.005639	1	1	IGF2
Pubmed	19541263	Clinical features associated with an I126M alpha2-chimaerin mutation in a family with autosomal-dominant Duane retraction syndrome.	 	0.005639	1	1	CHN1
Pubmed	16795040	Effects of histone deacetylase inhibitors on p55CDC/Cdc20 expression in HT29 cell line.	 	0.005639	1	1	CDC20
Pubmed	11122347	Differential neuronal expression and projections of melanin-concentrating hormone (MCH) and MCH-gene-overprinted-polypeptide (MGOP) in the rat brain.	 	0.005639	1	1	PMCH
Pubmed	11791875	Hb Gerland [alpha55(E4)Val-->Ala (alpha2)]: a new neutral alpha chain variant involving the alpha2 gene.	 	0.005639	1	1	HBA2
Pubmed	10635332	Inhibition of FEN-1 processing by DNA secondary structure at trinucleotide repeats.	 	0.005639	1	1	FEN1
Pubmed	1794972	1H and 15N NMR study of human lysozyme.	 	0.005639	1	1	LYZ
Pubmed	12882976	Juxtaposition of the two distal CX3C motifs via intrachain disulfide bonding is essential for the folding of Tim10.	 	0.005639	1	1	TIMM10
Pubmed	11454864	"Phosphorylation of Mcm4 at specific sites by cyclin-dependent kinase leads to loss of Mcm4,6,7 helicase activity."	 	0.005639	1	1	MCM4
Pubmed	16123317	"Regulation of vein graft hyperplasia by survivin, an inhibitor of apoptosis protein."	 	0.005639	1	1	BIRC5
Pubmed	11807980	Germline mutations of the BRCA1-associated ring domain (BARD1) gene in breast and breast/ovarian families negative for BRCA1 and BRCA2 alterations.	 	0.005639	1	1	BARD1
Pubmed	12865421	Overexpression of human beta TrCP1 deleted of its F box induces tumorigenesis in transgenic mice.	 	0.005639	1	1	CCNB1
Pubmed	15829330	Tumor specific expression of survivin-2B in lung cancer as a novel target of immunotherapy.	 	0.005639	1	1	BIRC5
Pubmed	18089792	Implication of AMP-activated protein kinase and Akt-regulated survivin in lung cancer chemopreventive activities of deguelin.	 	0.005639	1	1	BIRC5
Pubmed	11796712	Characterization of an unusual importin alpha binding motif in the borna disease virus p10 protein that directs nuclear import.	 	0.005639	1	1	KPNA2
Pubmed	1769665	Assignment of the human Ki-67 gene (MK167) to 10q25-qter.	 	0.005639	1	1	MKI67
Pubmed	17350465	Overexpression of BUBR1 is associated with chromosomal instability in bladder cancer.	 	0.005639	1	1	BUB1B
Pubmed	2429301	Altered levels of laminin receptor mRNA in various human carcinoma cells that have different abilities to bind laminin.	 	0.005639	1	1	RPSA
Pubmed	16329164	Molecular cloning and bioinformatics analysis of a novel spliced variant of survivin from human breast cancer cells.	 	0.005639	1	1	BIRC5
Pubmed	18192969	Photoexposition discriminates Notch 1 expression in human cutaneous squamous cell carcinoma.	 	0.005639	1	1	NOTCH1
Pubmed	3360448	Localization of the human c-kit protooncogene on the q11-q12 region of chromosome 4.	 	0.005639	1	1	KIT
Pubmed	7523489	Expression of c-kit and kit ligand proteins in normal human tissues.	 	0.005639	1	1	KIT
Pubmed	12527910	"Notch-1 induction, a novel activity of SV40 required for growth of SV40-transformed human mesothelial cells."	 	0.005639	1	1	NOTCH1
Pubmed	18604178	A novel role of the chromokinesin Kif4A in DNA damage response.	 	0.005639	1	1	KIF4A
Pubmed	16361539	"Increased expression of the polycomb group gene, EZH2, in transitional cell carcinoma of the bladder."	 	0.005639	1	1	EZH2
Pubmed	18632613	Thymoquinone triggers inactivation of the stress response pathway sensor CHEK1 and contributes to apoptosis in colorectal cancer cells.	 	0.005639	1	1	CHEK1
Pubmed	9417923	"Localization of BRRN1, the human homologue of Drosophila barr, to 2q11.2."	 	0.005639	1	1	NCAPH
Pubmed	18830231	Identification of a prostate cancer susceptibility gene on chromosome 5p13q12 associated with risk of both familial and sporadic disease.	 	0.005639	1	1	ITGA2
Pubmed	11111056	Two differentially spliced forms of topoisomerase IIalpha and beta mRNAs are conserved between birds and humans.	 	0.005639	1	1	TOP2A
Pubmed	9950367	A small interstitial deletion in the GPC3 gene causes Simpson-Golabi-Behmel syndrome in a Dutch-Canadian family.	 	0.005639	1	1	GPC3
Pubmed	17768177	"Identification and functional characterization of ASK/Dbf4, a novel cell survival gene in cutaneous melanoma with prognostic relevance."	 	0.005639	1	1	DBF4
Pubmed	17854787	Expression of securin promotes colorectal cancer cell death via a p53-independent pathway after radiation.	 	0.005639	1	1	PTTG1
Pubmed	12592353	C-Kit point mutations in core binding factor leukemias: correlation with white blood cell count and the white blood cell index.	 	0.005639	1	1	KIT
Pubmed	18709478	Monozygotic female twins discordant for Silver-Russell syndrome and hypomethylation of the H19-DMR.	 	0.005639	1	1	H19
Pubmed	16126226	Rationalising lysozyme amyloidosis: insights from the structure and solution dynamics of T70N lysozyme.	 	0.005639	1	1	LYZ
Pubmed	9746778	Nucleotide polymorphisms in the alpha2 gene define multiple alleles that are associated with differences in platelet alpha2 beta1 density.	 	0.005639	1	1	ITGA2
Pubmed	9308968	"Rpp1, an essential protein subunit of nuclear RNase P required for processing of precursor tRNA and 35S precursor rRNA in Saccharomyces cerevisiae."	 	0.005639	1	1	RPP30
Pubmed	12041664	Signal transduction-associated and cell activation-linked antigens expressed in human mast cells.	 	0.005639	1	1	KIT
Pubmed	11570724	A novel splice acceptor site mutation of the alpha2-globin gene causing alpha-thalassemia.	 	0.005639	1	1	HBA2
Pubmed	18055449	Cell-cell signaling through NOTCH regulates human embryonic stem cell proliferation.	 	0.005639	1	1	NOTCH1
Pubmed	12445743	The promoter region of the human BUBR1 gene and its expression analysis in lung cancer.	 	0.005639	1	1	BUB1B
Pubmed	18007590	The CENP-A NAC/CAD kinetochore complex controls chromosome congression and spindle bipolarity.	 	0.005639	1	1	CENPA
Pubmed	18583139	Bis(sulfonamide) isosters of mycophenolic adenine dinucleotide analogues: inhibition of inosine monophosphate dehydrogenase.	 	0.005639	1	1	IMPDH2
Pubmed	17353909	Pituitary tumor transforming gene interacts with Sp1 to modulate G1/S cell phase transition.	 	0.005639	1	1	PTTG1
Pubmed	18328944	"Gain at chromosomal region 5p15.33, containing TERT, is the most frequent genetic event in early stages of non-small cell lung cancer."	 	0.005639	1	1	TRIP13
Pubmed	18585117	No evidence for isolated imprinting mutations in the PEG1/MEST locus in Silver-Russell patients.	 	0.005639	1	1	MEST
Pubmed	17222376	[Expression and significance of MCM4 in esophageal cancer]	 	0.005639	1	1	MCM4
Pubmed	17158872	KEN-box-dependent degradation of the Bub1 spindle checkpoint kinase by the anaphase-promoting complex/cyclosome.	 	0.005639	1	1	BUB1
Pubmed	16326102	SAK/PLK4 is required for centriole duplication and flagella development.	 	0.005639	1	1	PLK4
Pubmed	11836160	Clinical phenotypes and molecular characterization of Hb H-Paks� disease.	 	0.005639	1	1	HBA2
Pubmed	19099573	EZH2 and BMI1 inversely correlate with prognosis and TP53 mutation in breast cancer.	 	0.005639	1	1	EZH2
Pubmed	16479070	Expression and mutational analysis of c-kit in ovarian surface epithelial tumors.	 	0.005639	1	1	KIT
Pubmed	17537922	Inducible XIST-dependent X-chromosome inactivation in human somatic cells is reversible.	 	0.005639	1	1	XIST
Pubmed	17325026	Paternally inherited submicroscopic duplication at 11p15.5 implicates insulin-like growth factor II in overgrowth and Wilms' tumorigenesis.	 	0.005639	1	1	IGF2
Pubmed	12779272	Origin of Hb A2' (Hb B2) [delta16(A13)Gly --> Arg (GGC --> CGC)].	 	0.005639	1	1	HBA2
Pubmed	11535615	Activation of mammalian Chk1 during DNA replication arrest: a role for Chk1 in the intra-S phase checkpoint monitoring replication origin firing.	 	0.005639	1	1	CHEK1
Pubmed	16612114	"Imprinted genes, placental development and fetal growth."	 	0.005639	1	1	IGF2
Pubmed	17127378	Survivin is not only a death encounter but also a survival protein for invading tumor cells.	 	0.005639	1	1	BIRC5
Pubmed	19190085	Fibulin-6 expression and anoikis in human salivary gland epithelial cells: implications in Sjogren's syndrome.	 	0.005639	1	1	HMCN1
Pubmed	12032302	A fragment of the HMGN2 protein homes to the nuclei of tumor cells and tumor endothelial cells in vivo.	 	0.005639	1	1	HMGN2
Pubmed	18488029	Gene silencing in cancer by histone H3 lysine 27 trimethylation independent of promoter DNA methylation.	 	0.005639	1	1	EZH2
Pubmed	18426563	Methylation alterations are not a major cause of PTTG1 misregulation.	 	0.005639	1	1	PTTG1
Pubmed	15923164	Survivin as a marker of cervical intraepithelial neoplasia and high-risk human papillomavirus and a predictor of virus clearance and prognosis in cervical cancer.	 	0.005639	1	1	BIRC5
Pubmed	14724582	Rad51 overexpression promotes alternative double-strand break repair pathways and genome instability.	 	0.005639	1	1	RAD51
Pubmed	1996404	Localization of endogenous beta-galactoside-binding lectin in human cells and tissues.	 	0.005639	1	1	LGALS1
Pubmed	18572908	Biophysical studies on the full-length human cyclin A2: protein stability and folding/unfolding thermodynamics.	 	0.005639	1	1	CCNA2
Pubmed	18633766	Alveolar capillary dysplasia: absence of CD117 immunoreactivity of putative hemangioblast precursor cells.	 	0.005639	1	1	KIT
Pubmed	11724905	Immunohistological analysis of glutathione transferase A4 distribution in several human tissues using a specific polyclonal antibody.	 	0.005639	1	1	GSTA4
Pubmed	12370476	Heterogeneity of presenile dementia with bone cysts (Nasu-Hakola disease): three genetic forms.	 	0.005639	1	1	TYROBP
Pubmed	17507465	Evidence for cooperative transforming activity of the human pituitary tumor transforming gene and human T-cell leukemia virus type 1 Tax.	 	0.005639	1	1	PTTG1
Pubmed	15793258	Genetic variations in the gene encoding ELMO1 are associated with susceptibility to diabetic nephropathy.	 	0.005639	1	1	ELMO1
Pubmed	11925104	CRM1-mediated nuclear export determines the cytoplasmic localization of the antiapoptotic protein Survivin.	 	0.005639	1	1	BIRC5
Pubmed	19417689	Transient receptor potential canonical type 3 channels and blood pressure in humans.	 	0.005639	1	1	TRPC3
Pubmed	19215053	A patient with the Simpson-Golabi-Behmel syndrome displays a loss-of-function point mutation in GPC3 that inhibits the attachment of this proteoglycan to the cell surface.	 	0.005639	1	1	GPC3
Pubmed	19102762	"Expression of centromere protein F (CENP-F) associated with higher FDG uptake on PET/CT, detected by cDNA microarray, predicts high-risk patients with primary breast cancer."	 	0.005639	1	1	CENPF
Pubmed	17143520	Autoantibodies to the inhibitor of apoptosis protein survivin in patients with brain tumors.	 	0.005639	1	1	BIRC5
Pubmed	15556936	"Dimeric galectin-1 binds with high affinity to alpha2,3-sialylated and non-sialylated terminal N-acetyllactosamine units on surface-bound extended glycans."	 	0.005639	1	1	LGALS1
Pubmed	16688224	"CUTLL1, a novel human T-cell lymphoma cell line with t(7;9) rearrangement, aberrant NOTCH1 activation and high sensitivity to gamma-secretase inhibitors."	 	0.005639	1	1	NOTCH1
Pubmed	18499984	Use of IMP3 in identification of carcinoma in fine needle aspiration biopsies of pancreas.	 	0.005639	1	1	IGF2BP3
Pubmed	18676762	T-cell responses to survivin in cancer patients undergoing radiation therapy.	 	0.005639	1	1	BIRC5
Pubmed	15972675	Novel innate immune functions for galectin-1: galectin-1 inhibits cell fusion by Nipah virus envelope glycoproteins and augments dendritic cell secretion of proinflammatory cytokines.	 	0.005639	1	1	LGALS1
Pubmed	17681176	Lamina propria c-kit+ immune precursors reside in human adult intestine and differentiate into natural killer cells.	 	0.005639	1	1	KIT
Pubmed	17616672	O-glycosylation regulates LNCaP prostate cancer cell susceptibility to apoptosis induced by galectin-1.	 	0.005639	1	1	LGALS1
Pubmed	15167915	Chronic myelogenous leukemia with acquired c-kit activating mutation and transient bone marrow mastocytosis.	 	0.005639	1	1	KIT
Pubmed	18931652	Systemic mastocytosis involving the gastrointestinal tract: clinicopathologic and molecular study of five cases.	 	0.005639	1	1	KIT
Pubmed	7558871	Hb Bibba or alpha 2 136(H19)Leu-->Pro beta 2 in a Caucasian family from Alabama.	 	0.005639	1	1	HBA2
Pubmed	12072198	Updates on the cytogenetics and molecular genetics of bone and soft tissue tumors. gastrointestinal stromal tumors.	 	0.005639	1	1	KIT
Pubmed	14701832	Structural and functional analysis of integrin alpha2I domain interaction with echovirus 1.	 	0.005639	1	1	ITGA2
Pubmed	7962047	Human CENP-A contains a histone H3 related histone fold domain that is required for targeting to the centromere.	 	0.005639	1	1	CENPA
Pubmed	16338457	Imprinting of PEG1/MEST isoform 2 in human placenta.	 	0.005639	1	1	MEST
Pubmed	15330855	"Mutational analyses of the human Rad51-Tyr315 residue, a site for phosphorylation in leukaemia cells."	 	0.005639	1	1	RAD51
Pubmed	1652758	Expression of a mutant DNA topoisomerase II in CCRF-CEM human leukemic cells selected for resistance to teniposide.	 	0.005639	1	1	TOP2A
Pubmed	11903044	Human insulin-like growth factor II leader 2 mediates internal initiation of translation.	 	0.005639	1	1	IGF2
Pubmed	12096343	hBUB1 defects in leukemia and lymphoma cells.	 	0.005639	1	1	BUB1
Pubmed	19053267	Bimodal recognition of DNA geometry by human topoisomerase II alpha: preferential relaxation of positively supercoiled DNA requires elements in the C-terminal domain.	 	0.005639	1	1	TOP2A
Pubmed	19342238	Ki-67 as a prognostic molecular marker in routine clinical use in breast cancer patients.	 	0.005639	1	1	MKI67
Pubmed	19212667	The tumor antigens RHAMM and G250/CAIX are expressed in head and neck squamous cell carcinomas and elicit specific CD8+ T cell responses.	 	0.005639	1	1	HMMR
Pubmed	12556969	Prognostic value of nuclear survivin expression in oesophageal squamous cell carcinoma.	 	0.005639	1	1	BIRC5
Pubmed	18559589	"CIP2A is overexpressed in gastric cancer and its depletion leads to impaired clonogenicity, senescence, or differentiation of tumor cells."	 	0.005639	1	1	KIAA1524
Pubmed	15163116	The relationship between insulin-like growth factor-II gene Apa I polymorphism and rheumatoid arthritis.	 	0.005639	1	1	IGF2
Pubmed	18798062	Antisense Ki-67 cDNA transfection reverses the tumorigenicity and induces apoptosis in human breast cancer cells.	 	0.005639	1	1	MKI67
Pubmed	16188652	Amplification and overexpression of CKS1B at chromosome band 1q21 is associated with reduced levels of p27Kip1 and an aggressive clinical course in multiple myeloma.	 	0.005639	1	1	CKS1B
Pubmed	17726262	Molecular alterations of KIT oncogene in gliomas.	 	0.005639	1	1	KIT
Pubmed	3549279	The Nova Scotia (type D) form of Niemann-Pick disease is caused by a G3097-->T transversion in NPC1.	 	0.005639	1	1	NASP
Pubmed	1831692	"TAN-1, the human homolog of the Drosophila notch gene, is broken by chromosomal translocations in T lymphoblastic neoplasms."	 	0.005639	1	1	NOTCH1
Pubmed	9211352	"Importance of the tubulointerstitium in human glomerulonephritis. II. Distribution of integrin chains beta 1, alpha 1 to 6 and alpha V."	 	0.005639	1	1	ITGA2
Pubmed	10365261	Cloning and expression of human cDNA encoding human homologue of pituitary tumor transforming gene.	 	0.005639	1	1	PTTG1
Pubmed	14972559	The human immunodeficiency virus Vpr protein binds Cdc25C: implications for G2 arrest.	 	0.005639	1	1	CDC25C
Pubmed	2971592	Cloning of human lysozyme gene and expression in the yeast Saccharomyces cerevisiae.	 	0.005639	1	1	LYZ
Pubmed	14500907	EZH2 is a marker of aggressive breast cancer and promotes neoplastic transformation of breast epithelial cells.	 	0.005639	1	1	EZH2
Pubmed	17434307	Cap disease caused by heterozygous deletion of the beta-tropomyosin gene TPM2.	 	0.005639	1	1	TPM2
Pubmed	15688426	Novel indication for cancer therapy: Chk1 inhibition sensitizes tumor cells to antimitotics.	 	0.005639	1	1	CHEK1
Pubmed	11078481	A fifth locus for primary autosomal recessive microcephaly maps to chromosome 1q31.	 	0.005639	1	1	ASPM
Pubmed	15076139	AIM-2: a novel tumor antigen is expressed and presented by human glioma cells.	 	0.005639	1	1	AIM2
Pubmed	16377132	Phosphorylation of the Pro-X-Thr-Pro site in phosphatase inhibitor-2 by cyclin-dependent protein kinase during M-phase of the cell cycle.	 	0.005639	1	1	CDC2
Pubmed	19728552	Determination of reference values for the soluble transferrin receptor (sTfR) on a cross sectional population sample.	 	0.005639	1	1	TFRC
Pubmed	12191765	Protein import into and across the mitochondrial inner membrane: role of the TIM23 and TIM22 translocons.	 	0.005639	1	1	TIMM13
Pubmed	19005492	GammaH2AX and cancer.	 	0.005639	1	1	H2AFX
Pubmed	18831895	Expression of c-kit protein and mutational status of the c-kit gene in osteosarcoma and their clinicopathological significance.	 	0.005639	1	1	KIT
Pubmed	1754403	Sequence of human HMG2 cDNA.	 	0.005639	1	1	HMGB2
Pubmed	9858805	Assignment1 of inosine '-monophosphate dehydrogenase type 2 (IMPDH2) to human chromosome band 3p21.2 by in situ hybridization.	 	0.005639	1	1	IMPDH2
Pubmed	12603093	Association of Hb G-Chinese [alpha30(B11)Glu --> Gln] with alpha-thalassemia-1 of the Thai type in a Taiwanese family.	 	0.005639	1	1	HBA2
Pubmed	18427106	Notch signaling mediates hypoxia-induced tumor cell migration and invasion.	 	0.005639	1	1	NOTCH1
Pubmed	3476948	Tissue-specific expression of insulin-like growth factor II mRNAs with distinct 5' untranslated regions.	 	0.005639	1	1	IGF2
Pubmed	16108013	Small interfering RNA targeting survivin sensitizes lung cancer cell with mutant p53 to adriamycin.	 	0.005639	1	1	BIRC5
Pubmed	19550395	Expression of galectin-1 in malignant tumors.	 	0.005639	1	1	LGALS1
Pubmed	12226092	Correlation of biochemical properties with the oligomeric state of human rad52 protein.	 	0.005639	1	1	RAD51
Pubmed	18500978	Enhancer of the rudimentary gene homologue (ERH) expression pattern in sporadic human breast cancer and normal breast tissue.	 	0.005639	1	1	ERH
Pubmed	10487837	Thymosin beta-10 gene overexpression is a general event in human carcinogenesis.	 	0.005639	1	1	TMSB10
Pubmed	16533774	Changes of topoisomerase IIalpha expression in breast tumors after neoadjuvant chemotherapy predicts relapse-free survival.	 	0.005639	1	1	TOP2A
Pubmed	12446294	"Polymorphism of the IGF2 gene, birth weight and grip strength in adult men."	 	0.005639	1	1	IGF2
Pubmed	19513517	Detection of glypican-3-specific CTLs in chronic hepatitis and liver cirrhosis.	 	0.005639	1	1	GPC3
Pubmed	12133447	"[Expression and clinical significance of anti-apoptosis gene, survivin, in acute leukemia]"	 	0.005639	1	1	BIRC5
Pubmed	14691533	Mechanism for multiple ligand recognition by the human transferrin receptor.	 	0.005639	1	1	TFRC
Pubmed	9570313	The 20kD protein of human [U4/U6.U5] tri-snRNPs is a novel cyclophilin that forms a complex with the U4/U6-specific 60kD and 90kD proteins.	 	0.005639	1	1	PPIH
Pubmed	17064697	Oxidative stress induces H2AX phosphorylation in human spermatozoa.	 	0.005639	1	1	H2AFX
Pubmed	9990072	Activating and dominant inactivating c-KIT catalytic domain mutations in distinct clinical forms of human mastocytosis.	 	0.005639	1	1	KIT
Pubmed	18500266	Expression of c-kit in fibroepithelial lesions of the breast is a mast cell phenomenon.	 	0.005639	1	1	KIT
Pubmed	15547750	Loss of imprinting of PEG1/MEST in lung cancer cell lines.	 	0.005639	1	1	MEST
Pubmed	8024548	Microsomal localization of cyclin A and cdk2 in proliferating rat liver cells.	 	0.005639	1	1	CCNA2
Pubmed	17393113	Changes of survivin mRNA and protein expression during paclitaxel treatment in breast cancer cells.	 	0.005639	1	1	BIRC5
Pubmed	19440020	Aurora-A/STK-15 is differentially expressed in the micropapillary variant of bladder cancer.	 	0.005639	1	1	AURKA
Pubmed	16024796	Mitochondrial ribosomal protein L41 suppresses cell growth in association with p53 and p27Kip1.	 	0.005639	1	1	MRPL41
Pubmed	19001879	AURKA overexpression accompanies dysregulation of DNA-damage response genes in invasive urothelial cell carcinoma.	 	0.005639	1	1	AURKA
Pubmed	19122847	Functional effects of KCNE3 mutation and its role in the development of Brugada syndrome.	 	0.005639	1	1	KCNE3
Pubmed	17090548	Platelet factor 4 (CXCL4) seals blood clots by altering the structure of fibrin.	 	0.005639	1	1	PF4
Pubmed	3754870	Chromosomal protein HMG-17. Complete human cDNA sequence and evidence for a multigene family.	 	0.005639	1	1	HMGN2
Pubmed	12200597	Overexpression of cyclin B1 in gastric cancer and its clinicopathological significance: an immunohistological study.	 	0.005639	1	1	CCNB1
Pubmed	17038538	Dissecting the role of endothelial SURVIVIN DeltaEx3 in angiogenesis.	 	0.005639	1	1	BIRC5
Pubmed	7642519	Chromosomal location and structural organization of the human deoxycytidylate deaminase gene.	 	0.005639	1	1	DCTD
Pubmed	12824871	Alterations of the c-kit gene in testicular germ cell tumors.	 	0.005639	1	1	KIT
Pubmed	17890945	807C/T polymorphism in the platelet glycoprotein Ia gene in young patients with ischemic stroke of undetermined etiology.	 	0.005639	1	1	ITGA2
Pubmed	17981789	A cell proliferation and chromosomal instability signature in anaplastic thyroid carcinoma.	 	0.005639	1	1	TTK
Pubmed	12598308	One-step detection of c-kit point mutations using peptide nucleic acid-mediated polymerase chain reaction clamping and hybridization probes.	 	0.005639	1	1	KIT
Pubmed	16018252	Two novel mutations in SRY gene form Chinese sex reversal XY females.	 	0.005639	1	1	SOX11
Pubmed	18559889	UbcH10 has a rate-limiting role in G1 phase but might not act in the spindle checkpoint or as part of an autonomous oscillator.	 	0.005639	1	1	UBE2C
Pubmed	11730338	"A nonradioactive high-performance liquid chromatographic microassay for uridine 5'-monophosphate synthase, orotate phosphoribosyltransferase, and orotidine 5'-monophosphate decarboxylase."	 	0.005639	1	1	UMPS
Pubmed	15623561	HTLV-I Tax directly binds the Cdc20-associated anaphase-promoting complex and activates it ahead of schedule.	 	0.005639	1	1	CDC20
Pubmed	11759064	Tissue microarray technique in soft tissue sarcoma: immunohistochemical Ki-67 expression in malignant fibrous histiocytoma.	 	0.005639	1	1	MKI67
Pubmed	1916766	Regional assignment of the human cell cycle control gene CDC2 to chromosome 10q21 by in situ hybridization.	 	0.005639	1	1	CDC2
Pubmed	9021160	Mapping of the Simpson-Golabi-Behmel overgrowth syndrome gene (GPC3) to chromosome X in human and rat by fluorescence in situ hybridization.	 	0.005639	1	1	GPC3
Pubmed	16759641	Contribution of the 37-kDa laminin receptor precursor in the anti-metastatic PSP94-derived peptide PCK3145 cell surface binding.	 	0.005639	1	1	RPSA
Pubmed	16969080	"Regulation and targeting of Eg5, a mitotic motor protein in blast crisis CML: overcoming imatinib resistance."	 	0.005639	1	1	KIF11
Pubmed	19697956	Metal ion interactions in the DNA cleavage/ligation active site of human topoisomerase IIalpha.	 	0.005639	1	1	TOP2A
Pubmed	6309000	Chromosome 3q (22-ter) encodes the human transferrin receptor.	 	0.005639	1	1	TFRC
Pubmed	19549920	Insulin-like growth factor-II methylation status in lymphocyte DNA and colon cancer risk in the Northern Sweden Health and Disease cohort.	 	0.005639	1	1	IGF2
Pubmed	17693049	Nuclear and cytoplasmic cellular distribution of survivin as survival predictor in resected non-small-cell lung cancer.	 	0.005639	1	1	BIRC5
Pubmed	9774477	Association of GAP-43 with detergent-resistant membranes requires two palmitoylated cysteine residues.	 	0.005639	1	1	GAP43
Pubmed	1744129	Cloning and characterization of a testis-specific thymosin beta 10 cDNA. Expression in post-meiotic male germ cells.	 	0.005639	1	1	TMSB10
Pubmed	18635001	The small-molecule iron transport inhibitor ferristatin/NSC306711 promotes degradation of the transferrin receptor.	 	0.005639	1	1	TFRC
Pubmed	9618306	Identification of a novel gene--SSK1--in human endothelial cells exposed to shear stress.	 	0.005639	1	1	BUB1B
Pubmed	15572125	Centriole assembly requires both centriolar and pericentriolar material proteins.	 	0.005639	1	1	SASS6
Pubmed	8479919	Cloning and sequence of the human RecA-like gene cDNA.	 	0.005639	1	1	RAD51
Pubmed	19435714	Stage-specific localization and expression of c-kit in the adult human testis.	 	0.005639	1	1	KIT
Pubmed	12032198	Determinants of circulating soluble transferrin receptor level in chronic haemodialysis patients.	 	0.005639	1	1	TFRC
Pubmed	11154282	Molecular dissection of interactions between Rad51 and members of the recombination-repair group.	 	0.005639	1	1	RAD51
Pubmed	18480403	Rapid cycling and precocious termination of G1 phase in cells expressing CDK1AF.	 	0.005639	1	1	CDC2
Pubmed	19407811	BubR1 acetylation at prometaphase is required for modulating APC/C activity and timing of mitosis.	 	0.005639	1	1	BUB1B
Pubmed	7512837	"A human homologue of the Drosophila developmental gene, Notch, is expressed in CD34+ hematopoietic precursors."	 	0.005639	1	1	NOTCH1
Pubmed	19032951	Stimulation of histamine H2 receptors activates TRPC3 channels through both phospholipase C and phospholipase D.	 	0.005639	1	1	TRPC3
Pubmed	1923752	An X-linked zinc finger gene mapping to Xq21.1-q21.3 closely related to ZFX and ZFY: possible origins from a common ancestral gene.	 	0.005639	1	1	ZNF711
Pubmed	16337122	SAR and inhibitor complex structure determination of a novel class of potent and specific Aurora kinase inhibitors.	 	0.005639	1	1	AURKA
Pubmed	7334520	Refinement of human lysozyme at 1.5 A resolution analysis of non-bonded and hydrogen-bond interactions.	 	0.005639	1	1	LYZ
Pubmed	11186266	Hb Clinico-Madrid [alpha90(FG2)Lys-->Arg]: a new hemoglobin mutation in the alpha2-globin gene.	 	0.005639	1	1	HBA2
Pubmed	3611046	Further characterization and structural studies on human placenta lectin.	 	0.005639	1	1	LGALS1
Pubmed	19365888	Tissue markers of hypoglycemia: insulin growth factor-II and E-domain of proinsulin growth factor-II expression in solitary fibrous tumor of the pleura.	 	0.005639	1	1	IGF2
Pubmed	16837776	Overexpression of polo-like kinase 1 (PLK1) and chromosomal instability in bladder cancer.	 	0.005639	1	1	PLK1
Pubmed	11782381	Elevated levels of Rad51 recombination protein in tumor cells.	 	0.005639	1	1	RAD51
Pubmed	6022858	Purification and some properties of inorganic pyrophosphatase from human erythrocytes.	 	0.005639	1	1	PPA1
Pubmed	15208666	"Overexpression, genomic amplification and therapeutic potential of inhibiting the UbcH10 ubiquitin conjugase in human carcinomas of diverse anatomic origin."	 	0.005639	1	1	UBE2C
Pubmed	18477210	Aberrant MAD2 expression in soft-tissue sarcoma.	 	0.005639	1	1	MAD2L1
Pubmed	11736643	Human kinesin superfamily member 4 is dominantly localized in the nuclear matrix and is associated with chromosomes during mitosis.	 	0.005639	1	1	KIF4A
Pubmed	12220643	End-joining of reconstituted histone H2AX-containing chromatin in vitro by soluble nuclear proteins from human cells.	 	0.005639	1	1	H2AFX
Pubmed	18265633	Analysis of c-kit protein expression in pancreatic neoplasms and its implication for prognosis.	 	0.005639	1	1	KIT
Pubmed	2571566	Assignment of the gene(s) involved in the expression of the proliferation-related Ki-67 antigen to human chromosome 10.	 	0.005639	1	1	MKI67
Pubmed	15880741	Amplification and overexpression of aurora kinase A (AURKA) in immortalized human ovarian epithelial (HOSE) cells.	 	0.005639	1	1	AURKA
Pubmed	9699740	A novel KIT gene missense mutation in a Japanese family with piebaldism.	 	0.005639	1	1	KIT
Pubmed	9662053	Organization of the human carboxypeptidase E gene and molecular scanning for mutations in Japanese subjects with NIDDM or obesity.	 	0.005639	1	1	CPE
Pubmed	17354233	"Identification of overexpressed genes in hepatocellular carcinoma, with special reference to ubiquitin-conjugating enzyme E2C gene expression."	 	0.005639	1	1	UBE2C
Pubmed	18469798	"Glypican-3 is overexpressed in lung squamous cell carcinoma, but not in adenocarcinoma."	 	0.005639	1	1	GPC3
Pubmed	11718568	Post-zygotic origin of complete maternal chromosome 7 isodisomy and consequent loss of placental PEG1/MEST expression.	 	0.005639	1	1	MEST
Pubmed	18161793	"The cell cycle control protein cdc25C is present, and phosphorylated on serine 214 in the transition from germinal vesicle to metaphase II in human oocyte meiosis."	 	0.005639	1	1	CDC25C
Pubmed	18977199	Phosphorylation of CAP-G is required for its chromosomal DNA localization during mitosis.	 	0.005639	1	1	NCAPG
Pubmed	12554738	Analysis of human flap endonuclease 1 mutants reveals a mechanism to prevent triplet repeat expansion.	 	0.005639	1	1	FEN1
Pubmed	9883972	A novel anti-inflammatory activity of lysozyme: modulation of serum complement activation.	 	0.005639	1	1	LYZ
Pubmed	17491592	Chk1 regulates the density of active replication origins during the vertebrate S phase.	 	0.005639	1	1	CHEK1
Pubmed	14661056	RNA interference targeting the M2 subunit of ribonucleotide reductase enhances pancreatic adenocarcinoma chemosensitivity to gemcitabine.	 	0.005639	1	1	RRM2
Pubmed	11738357	Mutations in the beta-tropomyosin (TPM2) gene--a rare cause of nemaline myopathy.	 	0.005639	1	1	TPM2
Pubmed	16139951	Germline variations of the topoisomerase IIalpha gene as risk factors for primary gastric B-cell lymphoma.	 	0.005639	1	1	TOP2A
Pubmed	19305155	Ectopic expression of histone H2AX mutants reveals a role for its post-translational modifications.	 	0.005639	1	1	H2AFX
Pubmed	2836804	Reduced DNA topoisomerase II activity in ataxia-telangiectasia cells.	 	0.005639	1	1	TOP2A
Pubmed	19549680	RAMA1 is a novel kinetochore protein involved in kinetochore-microtubule attachment.	 	0.005639	1	1	SKA3
Pubmed	9475158	A novel centromere monospecific serum to a human autoepitope on the histone H3-like protein CENP-A.	 	0.005639	1	1	CENPA
Pubmed	914146	[Biologic availability and \1st pass\ effect of drugs]	 	0.005639	1	1	CDC2
Pubmed	15638381	"Survivin expression in lymph nodes, affected by lymphoma and reactive hyperplasia."	 	0.005639	1	1	BIRC5
Pubmed	17487541	Association of KIT gene polymorphisms with bone mineral density in postmenopausal Korean women.	 	0.005639	1	1	KIT
Pubmed	18663361	Pituitary tumor transforming gene 1 regulates Aurora kinase A activity.	 	0.005639	1	1	PTTG1
Pubmed	17205517	CENP-F expression is associated with poor prognosis and chromosomal instability in patients with primary breast cancer.	 	0.005639	1	1	CENPF
Pubmed	18798731	Geminin is partially localized to the centrosome and plays a role in proper centrosome duplication.	 	0.005639	1	1	GMNN
Pubmed	18637271	"Expression changes in EZH2, but not in BMI-1, SIRT1, DNMT1 or DNMT3B are associated with DNA methylation changes in prostate cancer."	 	0.005639	1	1	EZH2
Pubmed	16682295	Translocations of 17q21 approximately qter in neuroblastoma cell lines infrequently include the topoisomerase IIalpha gene.	 	0.005639	1	1	TOP2A
Pubmed	19470732	Serum peptidome profiling revealed platelet factor 4 as a potential discriminating Peptide associated with pancreatic cancer.	 	0.005639	1	1	PF4
Pubmed	15915161	Loss of ZDHHC15 expression in a woman with a balanced translocation t(X;15)(q13.3;cen) and severe mental retardation.	 	0.005639	1	1	ZDHHC15
Pubmed	15905572	Myeloid-related protein-14 is a p38 MAPK substrate in human neutrophils.	 	0.005639	1	1	S100A9
Pubmed	18690204	Inhibition of renal cancer cell growth in vitro and in vivo with oncolytic adenovirus armed short hairpin RNA targeting Ki-67 encoding mRNA.	 	0.005639	1	1	MKI67
Pubmed	14515996	Human cathepsin H: deletion of the mini-chain switches substrate specificity from aminopeptidase to endopeptidase.	 	0.005639	1	1	CTSH
Pubmed	16188892	Human topoisomerase IIalpha rapidly relaxes positively supercoiled DNA: implications for enzyme action ahead of replication forks.	 	0.005639	1	1	TOP2A
Pubmed	7909248	Mapping of Simpson-Golabi-Behmel syndrome to Xq25-q27.	 	0.005639	1	1	GPC3
Pubmed	9865494	The Ifi 200 genes: an emerging family of IFN-inducible genes.	 	0.005639	1	1	AIM2
Pubmed	15833996	Dual binding modes for an HMG domain from human HMGB2 on DNA.	 	0.005639	1	1	HMGB2
Pubmed	19496787	Glypican-3 expression is correlated with poor prognosis in hepatocellular carcinoma.	 	0.005639	1	1	GPC3
Pubmed	17709342	Real-time assembly and disassembly of human RAD51 filaments on individual DNA molecules.	 	0.005639	1	1	RAD51
Pubmed	18773538	Aurora kinase-A regulates kinetochore/chromatin associated microtubule assembly in human cells.	 	0.005639	1	1	AURKA
Pubmed	17197532	Two pedigrees segregating Duane's retraction syndrome as a dominant trait map to the DURS2 genetic locus.	 	0.005639	1	1	CHN1
Pubmed	16357138	ANLN plays a critical role in human lung carcinogenesis through the activation of RHOA and by involvement in the phosphoinositide 3-kinase/AKT pathway.	 	0.005639	1	1	ANLN
Pubmed	9782058	Structural model of phospholipid-reconstituted human transferrin receptor derived by electron microscopy.	 	0.005639	1	1	TFRC
Pubmed	15623596	Detection of overexpressed and phosphorylated wild-type kit receptor in surgical specimens of small cell lung cancer.	 	0.005639	1	1	KIT
Pubmed	18294292	Secondary mutations in the kinase domain of the KIT gene are predominant in imatinib-resistant gastrointestinal stromal tumor.	 	0.005639	1	1	KIT
Pubmed	11448954	Differential involvement of the hyaluronan (HA) receptors CD44 and receptor for HA-mediated motility in endothelial cell function and angiogenesis.	 	0.005639	1	1	HMMR
Pubmed	15328517	"A novel 1p36.2 located gene, APITD1, with tumour-suppressive properties and a putative p53-binding domain, shows low expression in neuroblastoma tumours."	 	0.005639	1	1	APITD1
Pubmed	19047899	An oncofetal protein IMP3: a new molecular marker for the detection of esophageal adenocarcinoma and high-grade dysplasia.	 	0.005639	1	1	IGF2BP3
Pubmed	18344136	Effects of exercise intensity on salivary antimicrobial proteins and markers of stress in active men.	 	0.005639	1	1	LYZ
Pubmed	6490612	Initiation codon mutation as a cause of alpha thalassemia.	 	0.005639	1	1	HBA2
Pubmed	17113223	Breast cancer risk associated with AURKA 91T -->A polymorphism in relation to BRCA mutations.	 	0.005639	1	1	AURKA
Pubmed	11935313	Autoantibodies in sera of pancreatic cancer patients identify recombination factor Rad51 as a tumour-associated antigen.	 	0.005639	1	1	RAD51
Pubmed	11754049	No evidence of PEG1/MEST gene mutations in Silver-Russell syndrome patients.	 	0.005639	1	1	MEST
Pubmed	18550819	Carboxypeptidase E mediates palmitate-induced beta-cell ER stress and apoptosis.	 	0.005639	1	1	CPE
Pubmed	17569672	Suppression of TRPC3 leads to disappearance of store-operated channels and formation of a new type of store-independent channels in A431 cells.	 	0.005639	1	1	TRPC3
Pubmed	17548470	Linear distance from the locus control region determines epsilon-globin transcriptional activity.	 	0.005639	1	1	HBE1
Pubmed	12054478	Cell cycle specific changes in the human cyclin B1 gene regulatory region as revealed by response to trichostatin A.	 	0.005639	1	1	CCNB1
Pubmed	15655550	"Survivin, Survivin-2B, and Survivin-deItaEx3 expression in medulloblastoma: biologic markers of tumour morphology and clinical outcome."	 	0.005639	1	1	BIRC5
Pubmed	3597771	Molecular basis for nondeletion alpha-thalassemia in American blacks. Alpha 2(116GAG----UAG).	 	0.005639	1	1	HBA2
Pubmed	18788888	Expression of insulin-like growth factor pathway proteins in rhabdomyosarcoma: IGF-2 expression is associated with translocation-negative tumors.	 	0.005639	1	1	IGF2
Pubmed	18404201	Phenotypic and genotypic characteristics of mastocytosis according to the age of onset.	 	0.005639	1	1	KIT
Pubmed	12572894	Part of CD68+ macrophages in the clearence of apoptotic bodies in human metanephros.	 	0.005639	1	1	CD68
Pubmed	12244092	Structural basis for Chk1 inhibition by UCN-01.	 	0.005639	1	1	CHEK1
Pubmed	18715617	Clinicopathologic significance of mitotic arrest defective protein 2 overexpression in hepatocellular carcinoma.	 	0.005639	1	1	MAD2L1
Pubmed	1845984	Mutants of human insulin-like growth factor II with altered affinities for the type 1 and type 2 insulin-like growth factor receptor.	 	0.005639	1	1	IGF2
Pubmed	10580151	"Molecular cloning, genomic organization, and identification of the promoter for the human pituitary tumor transforming gene (PTTG)."	 	0.005639	1	1	PTTG1
Pubmed	17101699	ZBP1 regulates mRNA stability during cellular stress.	 	0.005639	1	1	IGF2BP1
Pubmed	1279499	Organization and nucleotide sequence of the human KIT (mast/stem cell growth factor receptor) proto-oncogene.	 	0.005639	1	1	KIT
Pubmed	12538733	Enhanced expression of the CD71 mesangial IgA1 receptor in Berger disease and Henoch-Sch�nlein nephritis: association between CD71 expression and IgA deposits.	 	0.005639	1	1	TFRC
Pubmed	10683318	The expression of membrane-associated 67-kDa laminin receptor (67LR) is modulated in vitro by cell-contact inhibition.	 	0.005639	1	1	RPSA
Pubmed	10339462	The alpha2 gene coding sequence T807/A873 of the platelet collagen receptor integrin alpha2beta1 might be a genetic risk factor for the development of stroke in younger patients.	 	0.005639	1	1	ITGA2
Pubmed	10695267	Autoantibodies from patients with idiopathic ataxia bind to M-phase phosphoprotein-1 (MPP1).	 	0.005639	1	1	KIF20B
Pubmed	15655354	Histone H2AX phosphorylation after cell irradiation with UV-B: relationship to cell cycle phase and induction of apoptosis.	 	0.005639	1	1	H2AFX
Pubmed	11978967	Human ribonucleotide reductase M2 subunit gene amplification and transcriptional regulation in a homogeneous staining chromosome region responsible for the mechanism of drug resistance.	 	0.005639	1	1	RRM2
Pubmed	7962193	"Cell cycle analysis and chromosomal localization of human Plk1, a putative homologue of the mitotic kinases Drosophila polo and Saccharomyces cerevisiae Cdc5."	 	0.005639	1	1	PLK1
Pubmed	15688402	Breast cancer risk associated with genotypic polymorphism of the mitosis-regulating gene Aurora-A/STK15/BTAK.	 	0.005639	1	1	AURKA
Pubmed	2478889	Ionomycin-regulated phosphorylation of the myeloid calcium-binding protein p14.	 	0.005639	1	1	S100A9
Pubmed	19541634	Functional analysis of an Orc6 mutant in Drosophila.	 	0.005639	1	1	ORC6L
Pubmed	12734105	Apoptosis repressor with caspase domain inhibits cardiomyocyte apoptosis by reducing K+ currents.	 	0.005639	1	1	NOL3
Pubmed	12779273	A new unstable alpha2-globin gene variant: Hb Chartres [alpha33(B14)Phe --> Ser].	 	0.005639	1	1	HBA2
Pubmed	15383173	A mutation found in the promoter region of the human survivin gene is correlated to overexpression of survivin in cancer cells.	 	0.005639	1	1	BIRC5
Pubmed	18839071	Correlation between the levels of survivin and survivin promoter-driven gene expression in cancer and non-cancer cells.	 	0.005639	1	1	BIRC5
Pubmed	15611664	Phosphorylation of Plk1 at S137 and T210 is inhibited in response to DNA damage.	 	0.005639	1	1	PLK1
Pubmed	17704744	Survivin expression in ovarian cancer.	 	0.005639	1	1	BIRC5
Pubmed	11083877	"Identification of the human mitochondrial oxodicarboxylate carrier. Bacterial expression, reconstitution, functional characterization, tissue distribution, and chromosomal location."	 	0.005639	1	1	SLC25A21
Pubmed	3013873	Identification of serine 24 as the unique site on the transferrin receptor phosphorylated by protein kinase C.	 	0.005639	1	1	TFRC
Pubmed	19397442	Forskolin decreases phosphorylation of histone H2AX in human cells induced by ionizing radiation.	 	0.005639	1	1	H2AFX
Pubmed	14536089	Transcription within a functional human centromere.	 	0.005639	1	1	CENPH
Pubmed	15467524	A novel diagnostic test detects a low frequency of the hemicentin Gln5345Arg variant among Northern Irish age related macular degeneration patients.	 	0.005639	1	1	HMCN1
Pubmed	10931132	Analysis of the autoimmune epitopes on human testicular NASP using recombinant and synthetic peptides.	 	0.005639	1	1	NASP
Pubmed	18602918	"Identification of a rare subset of adipose tissue-resident progenitor cells, which express CD133 and TRPC3 as a VEGF-regulated Ca2+ entry channel."	 	0.005639	1	1	TRPC3
Pubmed	9108086	Astrocyte apoptosis induced by HIV-1 transactivation of the c-kit protooncogene.	 	0.005639	1	1	KIT
Pubmed	11895447	Differential effects of ergosterol and cholesterol on Cdk1 activation and SRE-driven transcription.	 	0.005639	1	1	CDC2
Pubmed	12684414	Activation and overexpression of centrosome kinase BTAK/Aurora-A in human ovarian cancer.	 	0.005639	1	1	AURKA
Pubmed	2856408	"Cellular retinoic acid- and cellular retinol-binding proteins: complementary deoxyribonucleic acid cloning, chromosomal assignment, and tissue specific expression."	 	0.005639	1	1	RBP1
Pubmed	17804701	Oxygen concentration determines the biological effects of NOTCH-1 signaling in adenocarcinoma of the lung.	 	0.005639	1	1	NOTCH1
Pubmed	15161681	Gene expression in gastrointestinal stromal tumors is distinguished by KIT genotype and anatomic site.	 	0.005639	1	1	KIT
Pubmed	18729075	Increased KIT signalling with up-regulation of cyclin D correlates to accelerated proliferation and shorter disease-free survival in gastrointestinal stromal tumours (GISTs) with KIT exon 11 deletions.	 	0.005639	1	1	KIT
Pubmed	11685532	"A conserved protein, Nuf2, is implicated in connecting the centromere to the spindle during chromosome segregation: a link between the kinetochore function and the spindle checkpoint."	 	0.005639	1	1	NUF2
Pubmed	17582222	The survivin isoform survivin-3B is cytoprotective and can function as a chromosomal passenger complex protein.	 	0.005639	1	1	BIRC5
Pubmed	15658192	A new highly unstable alpha chain variant causing alpha(+)-thalassemia: Hb Zurich Albisrieden [alpha59(E8)Gly-->Arg (alpha2)].	 	0.005639	1	1	HBA2
Pubmed	17536304	"Survivin expression in non-small-cell lung carcinomas: correlation with apoptosis and other apoptosis-related proteins, clinicopathologic prognostic factors and prognosis."	 	0.005639	1	1	BIRC5
Pubmed	14204459	[A NEW HEMOGLOBIN I VARIANT: HBI-INTERLAKEN.]	 	0.005639	1	1	HBA2
Pubmed	12014628	Transcriptional regulation of the human topoisomerase IIalpha gene.	 	0.005639	1	1	TOP2A
Pubmed	15165851	"Location of tyrosine 315, a target for phosphorylation by cAbl tyrosine kinase, at the edge of the subunit-subunit interface of the human Rad51 filament."	 	0.005639	1	1	RAD51
Pubmed	18854511	Fertility in a i(Xq) Klinefelter patient: importance of XIST expression level determined by qRT-PCR in ruling out Klinefelter cryptic mosaicism as cause of oligozoospermia.	 	0.005639	1	1	XIST
Pubmed	17329230	Conserved motifs reveal details of ancestry and structure in the small TIM chaperones of the mitochondrial intermembrane space.	 	0.005639	1	1	TIMM13
Pubmed	14735186	Polo-like kinase 1 overexpression is an early event in the progression of papillary carcinoma.	 	0.005639	1	1	PLK1
Pubmed	10393424	Assignment of human proliferation associated p100 gene (C20orf1) to human chromosome band 20q11.2 by in situ hybridization.	 	0.005639	1	1	TPX2
Pubmed	16273239	Cyclin B1 expression is an independent prognostic marker for poor outcome in diffuse large B-cell lymphoma.	 	0.005639	1	1	CCNB1
Pubmed	16921029	Emi1 stably binds and inhibits the anaphase-promoting complex/cyclosome as a pseudosubstrate inhibitor.	 	0.005639	1	1	FBXO5
Pubmed	11850528	Galectin-1 is overexpressed in nasal polyps under budesonide and inhibits eosinophil migration.	 	0.005639	1	1	LGALS1
Pubmed	15818396	Human spindle checkpoint kinase Bub1 is cleaved during apoptosis.	 	0.005639	1	1	BUB1
Pubmed	2061330	The crystal structure of a mutant human lysozyme C77/95A with increased secretion efficiency in yeast.	 	0.005639	1	1	LYZ
Pubmed	12754712	A multiplex methylation PCR assay for identification of uniparental disomy of chromosome 7.	 	0.005639	1	1	MEST
Pubmed	19438748	UbcH10 expression in human lymphomas.	 	0.005639	1	1	UBE2C
Pubmed	18594525	Proliferation marker securin identifies favourable outcome in invasive ductal breast cancer.	 	0.005639	1	1	PTTG1
Pubmed	8639768	Early ontogeny of the human marrow from long bones: an immunohistochemical study of hematopoiesis and its microenvironment.	 	0.005639	1	1	CD68
Pubmed	18350628	KIT exon 11 codon 557/558 deletion/insertion mutations define a subset of gastrointestinal stromal tumors with malignant potential.	 	0.005639	1	1	KIT
Pubmed	19690544	Securin promotes the identification of favourable outcome in invasive breast cancer.	 	0.005639	1	1	PTTG1
Pubmed	1551873	Structure of a gene coding for human HMG2 protein.	 	0.005639	1	1	HMGB2
Pubmed	17543072	Nuclear survivin is associated with disease recurrence and poor survival in patients with cutaneous malignant melanoma.	 	0.005639	1	1	BIRC5
Pubmed	17167975	Cyclin B1 is useful to predict occult cervical lymph node metastases in tongue carcinoma.	 	0.005639	1	1	CCNB1
Pubmed	17974987	"Aurora-A, a negative prognostic marker, increases migration and decreases radiosensitivity in cancer cells."	 	0.005639	1	1	AURKA
Pubmed	11405816	A family with X-linked dystonia-deafness syndrome with a novel mutation of the DDP gene.	 	0.005639	1	1	TIMM8A
Pubmed	12892710	Induction of tumor angiogenesis by Slit-Robo signaling and inhibition of cancer growth by blocking Robo activity.	 	0.005639	1	1	ROBO1
Pubmed	9024683	Assembly of CENP-A into centromeric chromatin requires a cooperative array of nucleosomal DNA contact sites.	 	0.005639	1	1	CENPA
Pubmed	15754349	Aurora-A over-expression in high-grade PIN lesions and prostate cancer.	 	0.005639	1	1	AURKA
Pubmed	15271853	STK15 polymorphism and breast cancer risk in a population-based study.	 	0.005639	1	1	AURKA
Pubmed	18623083	The enhancer of zeste homolog 2 gene contributes to cell proliferation and apoptosis resistance in renal cell carcinoma cells.	 	0.005639	1	1	EZH2
Pubmed	15870931	Survivin protein in UVB induced apoptosis of melanoma cells and in melanoma progression.	 	0.005639	1	1	BIRC5
Pubmed	19407503	Pituitary tumour-transforming gene (PTTG) and pituitary senescence.	 	0.005639	1	1	PTTG1
Pubmed	12438418	hNuf2 inhibition blocks stable kinetochore-microtubule attachment and induces mitotic cell death in HeLa cells.	 	0.005639	1	1	NUF2
Pubmed	18452554	"Detection of novel cancer-testis antigen-specific T-cell responses in TIL, regional lymph nodes, and PBL in patients with esophageal squamous cell carcinoma."	 	0.005639	1	1	TTK
Pubmed	7680921	"Molecular cloning of CD68, a human macrophage marker related to lysosomal glycoproteins."	 	0.005639	1	1	CD68
Pubmed	15050916	Targeted inhibition of galectin-1 gene expression in tumor cells results in heightened T cell-mediated rejection; A potential mechanism of tumor-immune privilege.	 	0.005639	1	1	LGALS1
Pubmed	16171567	Modulation of Ki-67 expression and morphological changes induced by gef gene in MCF-7 human breast cancer cells.	 	0.005639	1	1	MKI67
Pubmed	12612055	repp86: A human protein associated in the progression of mitosis.	 	0.005639	1	1	TPX2
Pubmed	14550946	Mutational analysis of BARD1 in familial breast cancer patients in Japan.	 	0.005639	1	1	BARD1
Pubmed	17726700	The putative tumor suppressor AIM2 is frequently affected by different genetic alterations in microsatellite unstable colon cancers.	 	0.005639	1	1	AIM2
Pubmed	3553962	Complementation used to clone a human homologue of the fission yeast cell cycle control gene cdc2.	 	0.005639	1	1	CDC2
Pubmed	17195848	The Ndc80/HEC1 complex is a contact point for kinetochore-microtubule attachment.	 	0.005639	1	1	NDC80
Pubmed	12704705	Distribution of GAP-43 nerve fibers in the skin of the adult human hand.	 	0.005639	1	1	GAP43
Pubmed	486536	A new abnormal human hemoglobin: Hb Prato (alpha 2 31 (B12) Arg leads to Ser beta 2).	 	0.005639	1	1	HBA2
Pubmed	15576351	"DmGEN, a novel RAD2 family endo-exonuclease from Drosophila melanogaster."	 	0.005639	1	1	GEN1
Pubmed	9188632	Human immunodeficiency virus type 1 Vpr induces apoptosis following cell cycle arrest.	 	0.005639	1	1	CDC2
Pubmed	7928378	A second case of Hb Hanamaki [alpha 2 139(HC1)Lys->Glu beta 2] in an American family with erythrocytosis.	 	0.005639	1	1	HBA2
Pubmed	18995837	Structure and substrate recruitment of the human spindle checkpoint kinase Bub1.	 	0.005639	1	1	BUB1
Pubmed	1406973	A plus-end-directed motor enzyme that moves antiparallel microtubules in vitro localizes to the interzone of mitotic spindles.	 	0.005639	1	1	KIF23
Pubmed	16048634	Quantification of survivin mRNA in testes of infertile patients and in testicular germ cell tumours: high levels of expression associated with normal spermatogenesis.	 	0.005639	1	1	BIRC5
Pubmed	18698031	Checkpoint kinase 1 down-regulation by an inducible small interfering RNA expression system sensitized in vivo tumors to treatment with 5-fluorouracil.	 	0.005639	1	1	CHEK1
Pubmed	10949039	Crystal structure of human survivin reveals a bow tie-shaped dimer with two unusual alpha-helical extensions.	 	0.005639	1	1	BIRC5
Pubmed	11169447	Activated T lymphocytes bind in situ to stromal tissue of colon carcinoma but lack adhesion to tumor cells.	 	0.005639	1	1	ITGA2
Pubmed	15665853	SAS-6 defines a protein family required for centrosome duplication in C. elegans and in human cells.	 	0.005639	1	1	SASS6
Pubmed	19342626	Early hematopoietic zinc finger protein prevents tumor cell recognition by natural killer cells.	 	0.005639	1	1	ZNF521
Pubmed	16215315	"Increased expression of EZH2, a polycomb group protein, in bladder carcinoma."	 	0.005639	1	1	EZH2
Pubmed	12694192	Sequences downstream of the transcription initiation site are important for proper initiation and regulation of mouse ribonucleotide reductase R2 gene transcription.	 	0.005639	1	1	RRM2
Pubmed	17438137	"MLN8054, a small-molecule inhibitor of Aurora A, causes spindle pole and chromosome congression defects leading to aneuploidy."	 	0.005639	1	1	AURKA
Pubmed	18385244	Human immunodeficiency virus type 1 Vpr binds to the N lobe of the Wee1 kinase domain and enhances kinase activity for CDC2.	 	0.005639	1	1	WEE1
Pubmed	19207951	Membranous and cytoplasmic staining of Ki67 is associated with HER2 and ER status in invasive breast carcinoma.	 	0.005639	1	1	MKI67
Pubmed	7514077	"Preferential localization of c-kit product in tissue mast cells, basal cells of skin, epithelial cells of breast, small cell lung carcinoma and seminoma/dysgerminoma in human: immunohistochemical study on formalin-fixed, paraffin-embedded tissues."	 	0.005639	1	1	KIT
Pubmed	12085187	Somatic glypican 3 (GPC3) mutations in Wilms' tumour.	 	0.005639	1	1	GPC3
Pubmed	17316760	High-grade neuroendocrine carcinomas of the lung express K homology domain containing protein overexpressed in cancer but carcinoid tumors do not.	 	0.005639	1	1	IGF2BP3
Pubmed	9174055	A putative serine/threonine kinase encoding gene BTAK on chromosome 20q13 is amplified and overexpressed in human breast cancer cell lines.	 	0.005639	1	1	AURKA
Pubmed	2933589	Human blood platelets showing no response to collagen fail to express surface glycoprotein Ia.	 	0.005639	1	1	ITGA2
Pubmed	16055565	Differential requirements for survivin in hematopoietic cell development.	 	0.005639	1	1	BIRC5
Pubmed	15592663	"Neonatal diabetes, with hypoplastic pancreas, intestinal atresia and gall bladder hypoplasia: search for the aetiology of a new autosomal recessive syndrome."	 	0.005639	1	1	PLAGL1
Pubmed	19534726	"A novel p53 target gene, S100A9, induces p53-dependent cellular apoptosis and mediates the p53 apoptosis pathway."	 	0.005639	1	1	S100A9
Pubmed	17541984	Possible association of the pro-melanin-concentrating hormone gene with a greater body mass index as a side effect of the antipsychotic olanzapine.	 	0.005639	1	1	PMCH
Pubmed	12079377	The ATP-operated clamp of human DNA topoisomerase IIalpha: hyperstimulation of ATPase by \piggy-back\ binding.	 	0.005639	1	1	TOP2A
Pubmed	17369855	Androgen activates PEG10 to promote carcinogenesis in hepatic cancer cells.	 	0.005639	1	1	PEG10
Pubmed	17439397	Targeting cell cycle kinases for cancer therapy.	 	0.005639	1	1	TTK
Pubmed	8527164	Stem cell factor induces phosphorylation of a 200 kDa protein which associates with c-kit.	 	0.005639	1	1	KIT
Pubmed	19306396	Novel KCNE3 mutation reduces repolarizing potassium current and associated with long QT syndrome.	 	0.005639	1	1	KCNE3
Pubmed	10850408	Amplification in human breast cancer of a gene encoding a c-myc mRNA-binding protein.	 	0.005639	1	1	IGF2BP1
Pubmed	15665380	Monastrol inhibition of the mitotic kinesin Eg5.	 	0.005639	1	1	KIF11
Pubmed	12883947	Localization of importin alpha (Rch1) at the plasma membrane and subcellular redistribution during lymphocyte activation.	 	0.005639	1	1	KPNA2
Pubmed	17203351	Survivin expression in the ureteral wall of high degree vesicoureteral reflux in children.	 	0.005639	1	1	BIRC5
Pubmed	19158392	Fine tuning the cell cycle: activation of the Cdk1 inhibitory phosphorylation pathway during mitotic exit.	 	0.005639	1	1	CDC2
Pubmed	19129949	Doppel-induced cytotoxicity in human neuronal SH-SY5Y cells is antagonized by the prion protein.	 	0.005639	1	1	PRND
Pubmed	15512811	Survivin expression in acute leukemias and myelodysplastic syndromes.	 	0.005639	1	1	BIRC5
Pubmed	18604163	Characterization of centrosomal localization and dynamics of Cdc25C phosphatase in mitosis.	 	0.005639	1	1	CDC25C
Pubmed	15334693	Expression of survivin and its significance in colorectal cancer.	 	0.005639	1	1	BIRC5
Pubmed	15655357	CHK1 affecting cell radiosensitivity is independent of non-homologous end joining.	 	0.005639	1	1	CHEK1
Pubmed	12682647	Reduced expression of H19 in bone marrow cells from chronic myeloproliferative disorders.	 	0.005639	1	1	H19
Pubmed	17549346	Expression of orotate phosphoribosyl transferase in human pancreatic cancer: implication for the efficacy of uracil and tegafur-based adjuvant chemotherapy.	 	0.005639	1	1	UMPS
Pubmed	10878669	A de novo missense mutation in a critical domain of the X-linked DDP gene causes the typical deafness-dystonia-optic atrophy syndrome.	 	0.005639	1	1	TIMM8A
Pubmed	19155737	Re: CD117 immunoreactivity in atypical fibroxanthoma.	 	0.005639	1	1	KIT
Pubmed	17534980	Blepharospasm and limb dystonia caused by Mohr-Tranebjaerg syndrome with a novel splice-site mutation in the deafness/dystonia peptide gene.	 	0.005639	1	1	TIMM8A
Pubmed	11320054	Glypicans in growth control and cancer.	 	0.005639	1	1	GPC3
Pubmed	16708383	Prognostic significance of cyclin A in gastric cancer.	 	0.005639	1	1	CCNA2
Pubmed	11839739	Biochemical characterization of the human RAD51 protein. I. ATP hydrolysis.	 	0.005639	1	1	RAD51
Pubmed	12554778	Human pituitary tumor-transforming gene (PTTG1) motif suppresses prolactin expression.	 	0.005639	1	1	PTTG1
Pubmed	16205121	Proteasome activity is required for centromere separation independently of securin degradation in human cells.	 	0.005639	1	1	PTTG1
Pubmed	17251189	Structure of human Eg5 in complex with a new monastrol-based inhibitor bound in the R configuration.	 	0.005639	1	1	KIF11
Pubmed	1675006	A TaqI polymorphism in the human cyclin A gene.	 	0.005639	1	1	CCNA2
Pubmed	17805016	Preferential loss of the nonimprinted allele for the ZAC1 tumor suppressor gene in human capillary hemangioblastoma.	 	0.005639	1	1	PLAGL1
Pubmed	15789362	Overexpressed in anaplastic thyroid carcinoma-1 (OEATC-1) as a novel gene responsible for anaplastic thyroid carcinoma.	 	0.005639	1	1	KIAA0101
Pubmed	7514064	Alternate splicing creates two forms of the human kit protein.	 	0.005639	1	1	KIT
Pubmed	10950114	Galectin-1 and galectin-3 in chronic pancreatitis.	 	0.005639	1	1	LGALS1
Pubmed	12389033	Chromosome-induced microtubule assembly mediated by TPX2 is required for spindle formation in HeLa cells.	 	0.005639	1	1	TPX2
Pubmed	12732729	Polo-like kinase (Plk)1 depletion induces apoptosis in cancer cells.	 	0.005639	1	1	PLK1
Pubmed	10918561	Integrin expression in oral hairy leukoplakia and normal tongue epithelium.	 	0.005639	1	1	ITGA2
Pubmed	12082078	PRC1 is a microtubule binding and bundling protein essential to maintain the mitotic spindle midzone.	 	0.005639	1	1	PRC1
Pubmed	16179495	The candidate tumor suppressor gene ZAC is involved in keratinocyte differentiation and its expression is lost in basal cell carcinomas.	 	0.005639	1	1	PLAGL1
Pubmed	12102558	A growing family of guanine nucleotide exchange factors is responsible for activation of Ras-family GTPases.	 	0.005639	1	1	RALGPS2
Pubmed	15791570	C-kit expression in renal oncocytomas and chromophobe renal cell carcinomas.	 	0.005639	1	1	KIT
Pubmed	19442705	SNAT1 and a family with high rates of suicidal behavior.	 	0.005639	1	1	SLC38A1
Pubmed	15073847	Alterations in the expression of the cell cycle regulatory protein cyclin kinase subunit 1 in colorectal carcinoma.	 	0.005639	1	1	CDC2
Pubmed	16394085	Pituitary tumor-transforming gene regulates multiple downstream angiogenic genes in thyroid cancer.	 	0.005639	1	1	PTTG1
Pubmed	17962439	Expression of APITD1 is not related to copy number changes of chromosomal region 1p36 or the prognosis of uveal melanoma.	 	0.005639	1	1	APITD1
Pubmed	18035699	[Insulin-like growth factor (IGF)-II in human hepatocarcinogenesis--a potential therapeutic target?]	 	0.005639	1	1	IGF2
Pubmed	11851337	The Bmi-1 oncoprotein is overexpressed in human colorectal cancer and correlates with the reduced p16INK4a/p14ARF proteins.	 	0.005639	1	1	S100A9
Pubmed	10569726	Hb Toulon [alpha77(EF6)Pro-->His]: a new variant due to a mutation in the alpha2 gene found during measurement of glycated hemoglobin.	 	0.005639	1	1	HBA2
Pubmed	6445090	Complete covalent structure of human platelet factor 4.	 	0.005639	1	1	PF4
Pubmed	9828133	"Fine-scale mapping of a novel dementia gene, PLOSL, by linkage disequilibrium."	 	0.005639	1	1	TYROBP
Pubmed	17645464	Reduced immunostaining for c-kit receptors in mucosal mast cells in inflammatory bowel disease.	 	0.005639	1	1	KIT
Pubmed	17610829	Cell cycle: on-time delivery of Plk1 during cytokinesis.	 	0.005639	1	1	PLK1
Pubmed	17676996	Regulated degradation of the HIV-1 Vpu protein through a betaTrCP-independent pathway limits the release of viral particles.	 	0.005639	1	1	FBXO5
Pubmed	17569086	IGF-II promoter methylation and ovarian cancer prognosis.	 	0.005639	1	1	IGF2
Pubmed	11875736	Expression of different survivin variants in gastric carcinomas: first clues to a role of survivin-2B in tumour progression.	 	0.005639	1	1	BIRC5
Pubmed	10441007	Amplifications of DNA primase 1 (PRIM1) in human osteosarcoma.	 	0.005639	1	1	PRIM1
Pubmed	12200623	Up-regulation of cell division cycle (cdc) 2 kinase in neurons with early stage Alzheimer's disease neurofibrillary degeneration.	 	0.005639	1	1	CDC2
Pubmed	7479840	Identification of a point mutation in the catalytic domain of the protooncogene c-kit in peripheral blood mononuclear cells of patients who have mastocytosis with an associated hematologic disorder.	 	0.005639	1	1	KIT
Pubmed	15182198	"1,4-Benzoquinone is a topoisomerase II poison."	 	0.005639	1	1	TOP2A
Pubmed	15788441	Regulated expression of platelet factor 4 in human monocytes--role of PARs as a quantitatively important monocyte activation pathway.	 	0.005639	1	1	PF4
Pubmed	18728168	Severe intrauterine growth retardation and atypical diabetes associated with a translocation breakpoint disrupting regulation of the insulin-like growth factor 2 gene.	 	0.005639	1	1	IGF2
Pubmed	18724245	Multiple sporadic gastrointestinal stromal tumors (GISTs) of the proximal stomach are caused by different somatic KIT mutations suggesting a field effect.	 	0.005639	1	1	KIT
Pubmed	17943970	Somatic KIT mutations occur predominantly in seminoma germ cell tumors and are not predictive of bilateral disease: report of 220 tumors and review of literature.	 	0.005639	1	1	KIT
Pubmed	19224860	Oligomerization of the macrophage mannose receptor enhances gp120-mediated binding of HIV-1.	 	0.005639	1	1	MRC1
Pubmed	9218732	Expression of high-affinity 67-kDa laminin receptors in primary breast cancers and metachronous metastatic lesions or contralateral cancers.	 	0.005639	1	1	RPSA
Pubmed	17694325	Expression of the polycomb group protein EZH2 and its relation to outcome in patients with urothelial carcinoma of the bladder.	 	0.005639	1	1	EZH2
Pubmed	15795882	Clinical and molecular characteristics of pediatric gastrointestinal stromal tumors (GISTs).	 	0.005639	1	1	KIT
Pubmed	19239437	Analysis of NOTCH1 extracellular juxtamembrane expansion mutations in acute leukemias and multiple myelomas.	 	0.005639	1	1	NOTCH1
Pubmed	12716366	Aurora2/BTAK/STK15 is involved in cell cycle checkpoint and cell survival of aggressive non-Hodgkin's lymphoma.	 	0.005639	1	1	AURKA
Pubmed	16411215	"A novel mutation in the gene encoding TIMM8a, a component of the mitochondrial protein translocase complexes, in a Spanish familial case of deafness-dystonia (Mohr-Tranebjaerg) syndrome."	 	0.005639	1	1	TIMM8A
Pubmed	909779	Nucleotide sequence of 3' untranslated portion of human alpha globin mRNA.	 	0.005639	1	1	HBA2
Pubmed	18331723	Expression of ubiquitin-conjugating enzyme E2C/UbcH10 in astrocytic tumors.	 	0.005639	1	1	UBE2C
Pubmed	10052459	Replication-dependent marking of DNA by PCNA facilitates CAF-1-coupled inheritance of chromatin.	 	0.005639	1	1	CHAF1A
Pubmed	18840682	A chemical compound that stimulates the human homologous recombination protein RAD51.	 	0.005639	1	1	RAD51
Pubmed	16681683	Ki67 immunohistochemistry: a valuable marker in prognostication but with a risk of misclassification: proliferation subgroups formed based on Ki67 immunoreactivity and standardized mitotic index.	 	0.005639	1	1	MKI67
Pubmed	18245707	Isolation of ckit-positive cardiosphere-forming cells from human atrial biopsy.	 	0.005639	1	1	KIT
Pubmed	12065902	Stimulation of human flap endonuclease 1 by human immunodeficiency virus type 1 integrase: possible role for flap endonuclease 1 in 5'-end processing of human immunodeficiency virus type 1 integration intermediates.	 	0.005639	1	1	FEN1
Pubmed	18311783	Frequent overexpression of Aurora Kinase A in upper gastrointestinal adenocarcinomas correlates with potent antiapoptotic functions.	 	0.005639	1	1	AURKA
Pubmed	17208191	Cyclin A2 regulates nuclear-envelope breakdown and the nuclear accumulation of cyclin B1.	 	0.005639	1	1	CCNA2
Pubmed	17569112	"Survivin: potential role in diagnosis, prognosis and targeted therapy of gastric cancer."	 	0.005639	1	1	BIRC5
Pubmed	17502350	Integration of estrogen and Wnt signaling circuits by the polycomb group protein EZH2 in breast cancer cells.	 	0.005639	1	1	EZH2
Pubmed	14692019	STK15/Aurora-A expression in primary breast tumors is correlated with nuclear grade but not with prognosis.	 	0.005639	1	1	AURKA
Pubmed	19461405	Long lasting response to the multikinase inhibitor bay 43-9006 (Sorafenib) in a heavily pretreated metastatic thymic carcinoma.	 	0.005639	1	1	KIT
Pubmed	9391217	Localization of CENP-E in the fibrous corona and outer plate of mammalian kinetochores from prometaphase through anaphase.	 	0.005639	1	1	CENPE
Pubmed	17062801	Iron deficiency in obese postmenopausal women.	 	0.005639	1	1	TFRC
Pubmed	15068320	Prognostic factors in surgical stage I endometrial carcinoma.	 	0.005639	1	1	MKI67
Pubmed	9526615	PEG1 expression in maternal uniparental disomy 7.	 	0.005639	1	1	MEST
Pubmed	15236970	Crystal structure of the motor domain of the human kinetochore protein CENP-E.	 	0.005639	1	1	CENPE
Pubmed	12515609	[Unscheduled expression of cyclin B1 in G(1)-phase among cultured and clinical tumor cells]	 	0.005639	1	1	CCNB1
Pubmed	19427670	Hypomethylation of the P3 promoter is associated with up-regulation of IGF2 expression in human osteosarcoma.	 	0.005639	1	1	IGF2
Pubmed	18440313	Chromosome damage in mitosis induces BubR1 activation and prometaphase arrest.	 	0.005639	1	1	BUB1B
Pubmed	9038177	Mechanism of Ca2+ and monosaccharide binding to a C-type carbohydrate-recognition domain of the macrophage mannose receptor.	 	0.005639	1	1	MRC1
Pubmed	11702782	Mad2-Independent inhibition of APCCdc20 by the mitotic checkpoint protein BubR1.	 	0.005639	1	1	BUB1B
Pubmed	12495661	Survivin inhibits apoptosis in cytotrophoblasts.	 	0.005639	1	1	BIRC5
Pubmed	19397833	Clinical relevance of heparin-PF4 complex antibody in DVT after total joint replacement.	 	0.005639	1	1	PF4
Pubmed	12384403	Platelet factor 4 inhibits FGF2-induced endothelial cell proliferation via the extracellular signal-regulated kinase pathway but not by the phosphatidylinositol 3-kinase pathway.	 	0.005639	1	1	PF4
Pubmed	17594714	Ki-67 and coagulative tumor necrosis are independent predictors of poor outcome for patients with clear cell renal cell carcinoma and not surrogates for each other.	 	0.005639	1	1	MKI67
Pubmed	12019018	Molecular cloning and sequence analysis of hamster CENP-A cDNA.	 	0.005639	1	1	CENPA
Pubmed	18539906	Chemically synthesized human survivin does not inhibit caspase-3.	 	0.005639	1	1	BIRC5
Pubmed	12412731	Association of the platelet glycoprotein Ia C807T/G873A gene polymorphism and thrombosis in Beh�et patients.	 	0.005639	1	1	ITGA2
Pubmed	9744883	Active MAP kinase in mitosis: localization at kinetochores and association with the motor protein CENP-E.	 	0.005639	1	1	CENPE
Pubmed	19345583	Cap disease due to mutation of the beta-tropomyosin gene (TPM2).	 	0.005639	1	1	TPM2
Pubmed	3289755	Activation of cdc2 protein kinase during mitosis in human cells: cell cycle-dependent phosphorylation and subunit rearrangement.	 	0.005639	1	1	CDC2
Pubmed	16855786	The Polycomb group protein Enhancer of Zeste 2: its links to DNA repair and breast cancer.	 	0.005639	1	1	EZH2
Pubmed	14965441	Sequence of a variant thyroxine-binding globulin (TBG) in a family with partial TBG deficiency in Japanese (TBG-PDJ).	 	0.005639	1	1	EZH2
Pubmed	18983824	Chk1 phosphorylation at Ser286 and Ser301 occurs with both stalled DNA replication and damage checkpoint stimulation.	 	0.005639	1	1	CHEK1
Pubmed	17728254	Mps1 activation loop autophosphorylation enhances kinase activity.	 	0.005639	1	1	TTK
Pubmed	18633135	Galectin-1 signaling in leukocytes requires expression of complex-type N-glycans.	 	0.005639	1	1	LGALS1
Pubmed	1351677	Studies of the cloned 37-kDa subunit of activator 1 (replication factor C) of HeLa cells.	 	0.005639	1	1	RFC4
Pubmed	18259950	A 17 year-old man with an exon 11 mutation of CD-117 causing a gastrointestinal stromal tumor.	 	0.005639	1	1	KIT
Pubmed	14652645	Platelet factor 4 localization in carotid atherosclerotic plaques: correlation with clinical parameters.	 	0.005639	1	1	PF4
Pubmed	11937561	Activation of the neutrophil nicotinamide adenine dinucleotide phosphate oxidase by galectin-1.	 	0.005639	1	1	LGALS1
Pubmed	16292982	Securin is not required for chromosomal stability in human cells.	 	0.005639	1	1	PTTG1
Pubmed	8631371	Functional analysis of human/chicken transferrin receptor chimeras indicates that the carboxy-terminal region is important for ligand binding.	 	0.005639	1	1	TFRC
Pubmed	11782384	"Abolishment of the Tyr-15 inhibitory phosphorylation site on cdc2 reduces the radiation-induced G(2) delay, revealing a potential checkpoint in early mitosis."	 	0.005639	1	1	CDC2
Pubmed	19176456	T670X KIT mutations in gastrointestinal stromal tumors: making sense of missense.	 	0.005639	1	1	KIT
Pubmed	18278450	Effect of antisense RNA targeting Polo-like kinase 1 on cell growth in A549 lung cancer cells.	 	0.005639	1	1	PLK1
Pubmed	8703992	Expression of the human RAD51 gene during the cell cycle in primary human peripheral blood lymphocytes.	 	0.005639	1	1	RAD51
Pubmed	15075367	Role of the midbody matrix in cytokinesis: RNAi and genetic rescue analysis of the mammalian motor protein CHO1.	 	0.005639	1	1	KIF23
Pubmed	11684015	"BCR/ABL regulates mammalian RecA homologs, resulting in drug resistance."	 	0.005639	1	1	RAD51
Pubmed	3065332	Complete amino acid sequence of a beta-galactoside-binding lectin from human placenta.	 	0.005639	1	1	LGALS1
Pubmed	893407	"Isolation, crystallization, and primary amino acid sequence of human platelet factor 4."	 	0.005639	1	1	PF4
Pubmed	15037610	Interaction interface of human flap endonuclease-1 with its DNA substrates.	 	0.005639	1	1	FEN1
Pubmed	19622740	Structural transitions within human Rad51 nucleoprotein filaments.	 	0.005639	1	1	RAD51
Pubmed	19401347	gammaH2AX expression in tumors exposed to cisplatin and fractionated irradiation.	 	0.005639	1	1	H2AFX
Pubmed	18018472	MIB-1 immunolabeling: a valuable marker in prediction of benign recurring meningiomas.	 	0.005639	1	1	MKI67
Pubmed	12885482	Survivin and molecular pathogenesis of colorectal cancer.	 	0.005639	1	1	BIRC5
Pubmed	12375025	No mutations of the Bub1 gene in human gastric and oral cancer cell lines.	 	0.005639	1	1	BUB1
Pubmed	15671569	Clinical and molecular evidence for c-kit receptor as a therapeutic target in neuroblastic tumors.	 	0.005639	1	1	KIT
Pubmed	14614750	Insulin-like growth factor-II gene polymorphism is associated with primary open angle glaucoma.	 	0.005639	1	1	IGF2
Pubmed	8298652	Constitutional relaxation of insulin-like growth factor II gene imprinting associated with Wilms' tumour and gigantism.	 	0.005639	1	1	IGF2
Pubmed	12207013	Phosphorylation of threonine 210 and the role of serine 137 in the regulation of mammalian polo-like kinase.	 	0.005639	1	1	PLK1
Pubmed	16630118	Expression patterns of polo-like kinase 1 in human gastric cancer.	 	0.005639	1	1	PLK1
Pubmed	18826946	Identification of an autoinhibitory mechanism that restricts C1 domain-mediated activation of the Rac-GAP alpha2-chimaerin.	 	0.005639	1	1	CHN1
Pubmed	1304342	Beta beta homodimers exist in native rabbit skeletal muscle tropomyosin and increase after denaturation-renaturation.	 	0.005639	1	1	TPM2
Pubmed	15104219	Correlation between the polymorphism of glycoprotein Ia gene and acute coronary syndrome.	 	0.005639	1	1	ITGA2
Pubmed	3098319	Cloning and characterization of platelet factor 4 cDNA derived from a human erythroleukemic cell line.	 	0.005639	1	1	PF4
Pubmed	2113467	Molecular cloning of the human CTP synthetase gene by functional complementation with purified human metaphase chromosomes.	 	0.005639	1	1	CTPS
Pubmed	12883492	"Cellular retinol-binding protein-1 in hepatocellular carcinoma correlates with beta-catenin, Ki-67 index, and patient survival."	 	0.005639	1	1	RBP1
Pubmed	16750516	IGF2 polymorphisms are associated with hepatitis B virus clearance and hepatocellular carcinoma.	 	0.005639	1	1	IGF2
Pubmed	18923149	Regulation of kinetochore recruitment of two essential mitotic spindle checkpoint proteins by Mps1 phosphorylation.	 	0.005639	1	1	TTK
Pubmed	12612056	Phosphorylation of the cyclin b1 cytoplasmic retention sequence by mitogen-activated protein kinase and Plx.	 	0.005639	1	1	CDC2
Pubmed	12646164	Function of the loop residue Thr792 in human DNA topoisomerase II alpha.	 	0.005639	1	1	TOP2A
Pubmed	19651817	Confirmation of genetic associations at ELMO1 in the GoKinD collection supports its role as a susceptibility gene in diabetic nephropathy.	 	0.005639	1	1	ELMO1
Pubmed	7070526	Globin structural mutant alpha 125Leu leads to Pro is a novel cause of alpha-thalassaemia.	 	0.005639	1	1	HBA2
Pubmed	19082440	Overexpression of orotate phosphoribosyl transferase in hormone-refractory prostate cancer.	 	0.005639	1	1	UMPS
Pubmed	18671640	Role of galectin-1 in migration and invasion of human glioblastoma multiforme cell lines.	 	0.005639	1	1	LGALS1
Pubmed	19661345	Prognostic impact of CD68 and kallikrein 6 in human glioma.	 	0.005639	1	1	CD68
Pubmed	15265941	Platelet factor 4/CXCL4 induces phagocytosis and the generation of reactive oxygen metabolites in mononuclear phagocytes independently of Gi protein activation or intracellular calcium transients.	 	0.005639	1	1	PF4
Pubmed	11685038	The role of platelet factor 4 in platelet aggregation induced by the antibodies implicated in heparin-induced thrombocytopenia.	 	0.005639	1	1	PF4
Pubmed	14734534	Ordered proteolysis in anaphase inactivates Plk1 to contribute to proper mitotic exit in human cells.	 	0.005639	1	1	PLK1
Pubmed	12144061	"Four new variants of the alpha2-globin gene without clinical or hematologic effects: Hb Park Ridge [alpha9(alpha7)Asn-->Lys (alpha2)], Hb Norton [alpha72(EF1)His-->Asp (alpha2)], Hb Lombard [alpha103(G10)His-->Tyr (alpha2)], and Hb San Antonio [A113(GH2)Leu-->Arg (A2)]."	 	0.005639	1	1	HBA2
Pubmed	17485487	Tripin/hSgo2 recruits MCAK to the inner centromere to correct defective kinetochore attachments.	 	0.005639	1	1	SGOL2
Pubmed	16291951	"PBK/TOPK, a proliferating neural progenitor-specific mitogen-activated protein kinase kinase."	 	0.005639	1	1	PBK
Pubmed	8756078	Nondeletional alpha-thalassemia: first description of alpha Hph alpha and alpha Nco alpha mutations in a Spanish population.	 	0.005639	1	1	HBA2
Pubmed	10051608	Human deafness dystonia syndrome is a mitochondrial disease.	 	0.005639	1	1	TIMM8A
Pubmed	11773702	Expression of survivin mRNA and protein in gastric cancer cell line (MKN-45) during cisplatin treatment.	 	0.005639	1	1	BIRC5
Pubmed	15602006	Biochemical and proteomics approaches to characterize topoisomerase IIalpha cysteines and DNA as targets responsible for cisplatin-induced inhibition of topoisomerase IIalpha.	 	0.005639	1	1	TOP2A
Pubmed	15159417	Loss of Geminin induces rereplication in the presence of functional p53.	 	0.005639	1	1	GMNN
Pubmed	14592823	"Platelet factor 4 (PF-4)-induced neutrophil adhesion is controlled by src-kinases, whereas PF-4-mediated exocytosis requires the additional activation of p38 MAP kinase and phosphatidylinositol 3-kinase."	 	0.005639	1	1	PF4
Pubmed	17126494	"On the mechanism of apoptosis-inducing activity of human calprotectin: zinc sequestration, induction of a signaling pathway, or something else?"	 	0.005639	1	1	S100A9
Pubmed	15040889	Expression of MRP14 gene is frequently down-regulated in Chinese human esophageal cancer.	 	0.005639	1	1	S100A9
Pubmed	16460801	Identification of c-Kit gene mutations in patients with polycythemia vera.	 	0.005639	1	1	KIT
Pubmed	10779515	Structure of a C-type carbohydrate recognition domain from the macrophage mannose receptor.	 	0.005639	1	1	MRC1
Pubmed	8202514	Structure and cell cycle-regulated transcription of the human cyclin A gene.	 	0.005639	1	1	CCNA2
Pubmed	8069469	Localization of uridine monophosphate synthase (UMPS) gene to river buffalo chromosomes by FISH.	 	0.005639	1	1	UMPS
Pubmed	16865274	Oncogenic effect of Polo-like kinase 1 expression in human gastric carcinomas.	 	0.005639	1	1	PLK1
Pubmed	15581945	Altered expression and loss of heterozygosity of the LOT1 gene in ovarian cancer.	 	0.005639	1	1	PLAGL1
Pubmed	2372512	Hb Icaria-Hb H disease: identification of the Hb Icaria mutation through analysis of amplified DNA.	 	0.005639	1	1	HBA2
Pubmed	12898336	Epstein-Barr virus nuclear antigen-1 colocalizes with lamin B1 in the nucleoplasm and along the nuclear rim.	 	0.005639	1	1	LMNB1
Pubmed	12569609	Expression of survivin in astrocytic tumors: correlation with malignant grade and prognosis.	 	0.005639	1	1	BIRC5
Pubmed	17714426	Homodimerization antagonizes nuclear export of survivin.	 	0.005639	1	1	BIRC5
Pubmed	17018586	Enhancer of Zeste 2 as a marker of preneoplastic progression in the breast.	 	0.005639	1	1	EZH2
Pubmed	10722113	Hb Sallanches [alpha104(G11)Cys-->Tyr]: a rare alpha2-globin chain variant found in the homozygous state in three members of a Pakistani family.	 	0.005639	1	1	HBA2
Pubmed	19293795	"Extracellular, cell-permeable survivin inhibits apoptosis while promoting proliferative and metastatic potential."	 	0.005639	1	1	BIRC5
Pubmed	16697311	Type-2A protein phosphatase activity is required to maintain death receptor responsiveness.	 	0.005639	1	1	ITGA2
Pubmed	1763388	Localization of the gene encoding the alpha 2 subunit of the human VLA-2 receptor to chromosome 5q23-31.	 	0.005639	1	1	ITGA2
Pubmed	16876122	"A cytoskeleton-associated protein, TMAP/CKAP2, is involved in the proliferation of human foreskin fibroblasts."	 	0.005639	1	1	CKAP2
Pubmed	9178771	Cloning of a gene highly overexpressed in cancer coding for a novel KH-domain containing protein.	 	0.005639	1	1	IGF2BP3
Pubmed	11870519	Identification of molecular markers for the early detection of human squamous cell carcinoma of the uterine cervix.	 	0.005639	1	1	RPS12
Pubmed	6267071	A homogeneous type II DNA topoisomerase from HeLa cell nuclei.	 	0.005639	1	1	TOP2A
Pubmed	18182116	Dystrophin deficiency in canine X-linked muscular dystrophy in Japan (CXMDJ) alters myosin heavy chain expression profiles in the diaphragm more markedly than in the tibialis cranialis muscle.	 	0.005639	1	1	MYH10
Pubmed	15621150	An exploratory study on pharmacogenetics of inosine-monophosphate dehydrogenase II in peripheral mononuclear cells from liver-transplant recipients.	 	0.005639	1	1	IMPDH2
Pubmed	13856	Hemoglobin Tarrant: alpha126(H9) Asp leads to Asn. A new hemoglobin variant in the alpha1beta1 contact region showing high oxygen affinity and reduced cooperativity.	 	0.005639	1	1	HBA2
Pubmed	10640150	Regional fine mapping of HMG17 to chromosomal band 1p35.	 	0.005639	1	1	HMGN2
Pubmed	9120267	Tyrosine and serine protein kinase activities associated with ligand-induced internalized TCR/CD3 complexes.	 	0.005639	1	1	TFRC
Pubmed	9813064	Cell cycle-dependent usage of transcriptional start sites. A novel mechanism for regulation of cyclin B1.	 	0.005639	1	1	CCNB1
Pubmed	8076949	Chromosomal localization of the human histone H2A.X gene to 11q23.2-q23.3 by fluorescence in situ hybridization.	 	0.005639	1	1	H2AFX
Pubmed	1421756	Presence of O-linked oligosaccharide on a threonine residue in the human transferrin receptor.	 	0.005639	1	1	TFRC
Pubmed	9158001	Identification of a gene containing zinc-finger motifs based on lost expression in malignantly transformed rat ovarian surface epithelial cells.	 	0.005639	1	1	PLAGL1
Pubmed	2299665	"Novel human brain cDNA encoding a 34,000 Mr protein n-chimaerin, related to both the regulatory domain of protein kinase C and BCR, the product of the breakpoint cluster region gene."	 	0.005639	1	1	CHN1
Pubmed	11861291	The c-KIT mutation causing human mastocytosis is resistant to STI571 and other KIT kinase inhibitors; kinases with enzymatic site mutations show different inhibitor sensitivity profiles than wild-type kinases and those with regulatory-type mutations.	 	0.005639	1	1	KIT
Pubmed	17881737	"Distinct sequence elements of cyclin B1 promote localization to chromatin, centrosomes, and kinetochores during mitosis."	 	0.005639	1	1	CCNB1
Pubmed	18716870	The Association Between the Survivin C-31G Polymorphism and Gastric Cancer Risk in a Chinese Population.	 	0.005639	1	1	BIRC5
Pubmed	15340842	KIAA0008 gene is associated with invasive phenotype of human hepatocellular carcinoma--a functional analysis.	 	0.005639	1	1	DLGAP5
Pubmed	18785116	Expression pattern of glypican-3 (GPC3) during human embryonic and fetal development.	 	0.005639	1	1	GPC3
Pubmed	18806826	Repression of E-cadherin by the polycomb group protein EZH2 in cancer.	 	0.005639	1	1	EZH2
Pubmed	16990717	"Over-expression of topoisomerase IIalpha is related to the grade of cervical intraepithelial neoplasia (CIN) and high-risk human papillomavirus (HPV), but does not predict prognosis in cervical cancer or HPV clearance after cone treatment."	 	0.005639	1	1	TOP2A
Pubmed	18488000	Evolution from heterozygous to homozygous KIT mutation in gastrointestinal stromal tumor correlates with the mechanism of mitotic nondisjunction and significant tumor progression.	 	0.005639	1	1	KIT
Pubmed	12372432	Photobleaching of GFP-labeled H2AX in chromatin: H2AX has low diffusional mobility in the nucleus.	 	0.005639	1	1	H2AFX
Pubmed	18512732	Effects of Eg5 knockdown on human prostate cancer xenograft growth and chemosensitivity.	 	0.005639	1	1	KIF11
Pubmed	11850403	"The ABCs of SMC proteins: two-armed ATPases for chromosome condensation, cohesion, and repair."	 	0.005639	1	1	SMC4
Pubmed	18025303	Mitosis persists in the absence of Cdk1 activity when proteolysis or protein phosphatase activity is suppressed.	 	0.005639	1	1	CDC2
Pubmed	18417526	Associations of DNase IV polymorphisms with autoantibodies in patients with systemic lupus erythematosus.	 	0.005639	1	1	FEN1
Pubmed	7505199	Complementary DNA cloning and characterization of truncated form of c-kit in human colon carcinoma cells.	 	0.005639	1	1	KIT
Pubmed	15964826	Akt/protein kinase B-dependent phosphorylation and inactivation of WEE1Hu promote cell cycle progression at G2/M transition.	 	0.005639	1	1	WEE1
Pubmed	19520156	Tregs utilize beta-galactoside-binding protein to transiently inhibit PI3K/p21ras activity of human CD8+ T cells to block their TCR-mediated ERK activity and proliferation.	 	0.005639	1	1	LGALS1
Pubmed	16772118	Detection of aberrations of ubiquitin-conjugating enzyme E2C gene (UBE2C) in advanced colon cancer with liver metastases by DNA microarray and two-color FISH.	 	0.005639	1	1	UBE2C
Pubmed	18192073	"The role of survivin on overall survival of non-small cell lung cancer, a meta-analysis of published literatures."	 	0.005639	1	1	BIRC5
Pubmed	17851046	Human umbilical cord epithelial cells express Notch1: implications for its epidermal-like differentiation.	 	0.005639	1	1	NOTCH1
Pubmed	19112393	Survivin products in pituitary tumors.	 	0.005639	1	1	BIRC5
Pubmed	9223435	Cloning of a human heptahelical receptor closely related to the P2Y5 receptor.	 	0.005639	1	1	LPAR4
Pubmed	18291413	Comprehensive mapping of the C-terminus of flap endonuclease-1 reveals distinct interaction sites for five proteins that represent different DNA replication and repair pathways.	 	0.005639	1	1	FEN1
Pubmed	15466974	STK15 polymorphisms and association with risk of invasive ovarian cancer.	 	0.005639	1	1	AURKA
Pubmed	18922873	Simian virus 40 large T antigen disrupts genome integrity and activates a DNA damage response via Bub1 binding.	 	0.005639	1	1	BUB1
Pubmed	10733883	High-throughput assay for inorganic pyrophosphatases using the cytosolic enzymes of Saccharomyces cerevisiae and human as an example.	 	0.005639	1	1	PPA1
Pubmed	18835627	Merkel cell carcinoma expresses K homology domain-containing protein overexpressed in cancer similar to other high-grade neuroendocrine carcinomas.	 	0.005639	1	1	IGF2BP3
Pubmed	18385235	"Insulin-like growth factor II mRNA binding protein 1 associates with Gag protein of human immunodeficiency virus type 1, and its overexpression affects virus assembly."	 	0.005639	1	1	IGF2BP1
Pubmed	17634283	Inactivation of Rho GTPases with Clostridium difficile toxin B impairs centrosomal activation of Aurora-A in G2/M transition of HeLa cells.	 	0.005639	1	1	AURKA
Pubmed	11256631	Coordinated response of mammalian Rad51 and Rad52 to DNA damage.	 	0.005639	1	1	RAD51
Pubmed	12473461	Weak cooperativity in the core causes a switch in folding mechanism between two proteins of the cks family.	 	0.005639	1	1	CKS1B
Pubmed	10871281	"TPX2, A novel xenopus MAP involved in spindle pole organization."	 	0.005639	1	1	TPX2
Pubmed	12032304	Insulin-like growth factor 2 and potential regulators of hemangioma growth and involution identified by large-scale expression analysis.	 	0.005639	1	1	IGF2
Pubmed	1688470	Inhibition of angiogenesis by recombinant human platelet factor-4 and related peptides.	 	0.005639	1	1	PF4
Pubmed	16054170	Molecular implications of the human glutathione transferase A-4 gene (hGSTA4) polymorphisms in neurodegenerative diseases.	 	0.005639	1	1	GSTA4
Pubmed	17239009	Differential expression of survivin splice isoforms in medulloblastomas.	 	0.005639	1	1	BIRC5
Pubmed	11862483	Markers of drug resistance in relapsing colon cancer.	 	0.005639	1	1	TOP2A
Pubmed	2656677	A protein containing the cystic fibrosis antigen is an inhibitor of protein kinases.	 	0.005639	1	1	S100A9
Pubmed	16873289	Do the survivin (BIRC5) splice variants modulate or add to the prognostic value of total survivin in breast cancer?	 	0.005639	1	1	BIRC5
Pubmed	16652144	"Oxidative stress induces a prolonged but reversible arrest in p53-null cancer cells, involving a Chk1-dependent G2 checkpoint."	 	0.005639	1	1	CHEK1
Pubmed	18503753	"Crystal structure of HsEg5 in complex with clinical candidate CK0238273 provides insight into inhibitory mechanism, potency, and specificity."	 	0.005639	1	1	KIF11
Pubmed	17710669	Multiple novel alterations in Kit tyrosine kinase in patients with gastrointestinally pronounced systemic mast cell activation disorder.	 	0.005639	1	1	KIT
Pubmed	11999574	Expression of hBUB1 in acute myeloid leukemia.	 	0.005639	1	1	BUB1
Pubmed	2829884	"Human lysozyme: sequencing of a cDNA, and expression and secretion by Saccharomyces cerevisiae."	 	0.005639	1	1	LYZ
Pubmed	12091362	Evidence for the involvement of a hematopoietic progenitor cell in systemic mastocytosis from single-cell analysis of mutations in the c-kit gene.	 	0.005639	1	1	KIT
Pubmed	11597015	Comparative expression of the mitotic regulators SAK and PLK in colorectal cancer.	 	0.005639	1	1	PLK4
Pubmed	18561322	Nuclear karyopherin alpha2 expression predicts poor survival in patients with advanced breast cancer irrespective of treatment intensity.	 	0.005639	1	1	KPNA2
Pubmed	17804818	Preventing the degradation of mps1 at centrosomes is sufficient to cause centrosome reduplication in human cells.	 	0.005639	1	1	TTK
Pubmed	14649319	A new alpha2-globin gene [codon 90 (AAG --> TAG)] nonsense mutation.	 	0.005639	1	1	HBA2
Pubmed	12172985	c-KIT-expressing Ewing tumour cells are insensitive to imatinib mesylate (STI571).	 	0.005639	1	1	KIT
Pubmed	18519761	AP1-dependent galectin-1 expression delineates classical hodgkin and anaplastic large cell lymphomas from other lymphoid malignancies with shared molecular features.	 	0.005639	1	1	LGALS1
Pubmed	19112505	Reduction of Orc6 expression sensitizes human colon cancer cells to 5-fluorouracil and cisplatin.	 	0.005639	1	1	ORC6L
Pubmed	11453085	Polymorphism of uridine monophosphate kinase: population study in Japanese and phenotyping in bloodstains.	 	0.005639	1	1	UCK2
Pubmed	3472205	Rat cellular retinol-binding protein: cDNA sequence and rapid retinol-dependent accumulation of mRNA.	 	0.005639	1	1	RBP1
Pubmed	15305370	Tumor-specific exon creation of the HELLS/SMARCA6 gene in non-small cell lung cancer.	 	0.005639	1	1	HELLS
Pubmed	17901244	"NOTCH1 mutation can be an early, prenatal genetic event in T-ALL."	 	0.005639	1	1	NOTCH1
Pubmed	19550121	Correlation of Notch1 expression and activation to cisplatin-sensitivity of head and neck squamous cell carcinoma.	 	0.005639	1	1	NOTCH1
Pubmed	11687296	Improved heterologous expression of human glutathione transferase A4-4 by random silent mutagenesis of codons in the 5' region.	 	0.005639	1	1	GSTA4
Pubmed	16780420	"Direct binding of Cbl to Tyr568 and Tyr936 of the stem cell factor receptor/c-Kit is required for ligand-induced ubiquitination, internalization and degradation."	 	0.005639	1	1	KIT
Pubmed	16582103	The DNA-protein interaction modes of FEN-1 with gap substrates and their implication in preventing duplication mutations.	 	0.005639	1	1	FEN1
Pubmed	17121839	Nitric oxide down-regulates polo-like kinase 1 through a proximal promoter cell cycle gene homology region.	 	0.005639	1	1	PLK1
Pubmed	12716386	"Langerhans cell histiocytosis: an evaluation of histopathological parameters, demonstration of proliferation by Ki-67 and mitotic bodies."	 	0.005639	1	1	MKI67
Pubmed	9175734	A novel mechanism generating short deletion/insertions following slippage is suggested by a mutation in the human alpha2-globin gene.	 	0.005639	1	1	HBA2
Pubmed	15279782	H2AX: the histone guardian of the genome.	 	0.005639	1	1	H2AFX
Pubmed	18478545	Ca2+ mobilization mediated by transient receptor potential canonical 3 is associated with thrombin-induced morphological changes in 1321N1 human astrocytoma cells.	 	0.005639	1	1	TRPC3
Pubmed	17894554	Effect of loss of heterozygosity of the c-kit gene on prognosis after hepatectomy for metastatic liver gastrointestinal stromal tumors.	 	0.005639	1	1	KIT
Pubmed	17005684	Phosphorylation of MCM4 at sites inactivating DNA helicase activity of the MCM4-MCM6-MCM7 complex during Epstein-Barr virus productive replication.	 	0.005639	1	1	MCM4
Pubmed	18425326	Hyaluronan-mediated motility: a target in oral squamous cell carcinoma.	 	0.005639	1	1	HMMR
Pubmed	10051550	Mitochondria and dystonia: the movement disorder connection?	 	0.005639	1	1	TIMM8A
Pubmed	12444553	Expression of hpttg proto-oncogene in lymphoid neoplasias.	 	0.005639	1	1	PTTG1
Pubmed	17640228	Expression of polycomb group protein EZH2 in nevi and melanoma.	 	0.005639	1	1	EZH2
Pubmed	12510154	Upregulation of survivin by HIV-1 Vpr.	 	0.005639	1	1	BIRC5
Pubmed	18492021	The knockdown of endogenous replication factor C4 decreases the growth and enhances the chemosensitivity of hepatocellular carcinoma cells.	 	0.005639	1	1	RFC4
Pubmed	11328809	Crystal structure of the mitotic spindle kinesin Eg5 reveals a novel conformation of the neck-linker.	 	0.005639	1	1	KIF11
Pubmed	15628858	Critical regions for assembly of vertebrate nonmuscle myosin II.	 	0.005639	1	1	MYH10
Pubmed	16596227	Pilot study examining tumor expression of RAD51 and clinical outcomes in human head cancers.	 	0.005639	1	1	RAD51
Pubmed	18796645	Functional and structural bases of a cysteine-less mutant as a long-lasting substitute for galectin-1.	 	0.005639	1	1	LGALS1
Pubmed	11786393	The complexity of KIT gene mutations and chromosome rearrangements and their clinical correlation in gastrointestinal stromal (pacemaker cell) tumors.	 	0.005639	1	1	KIT
Pubmed	12485499	[Expression and mutation of c-kit gene in gastrointestinal stromal tumor]	 	0.005639	1	1	KIT
Pubmed	10381815	Human granulosa cells express integrin alpha2 and collagen type IV: possible involvement of collagen type IV in granulosa cell luteinization.	 	0.005639	1	1	ITGA2
Pubmed	16082245	"KIT (CD117): a review on expression in normal and neoplastic tissues, and mutations and their clinicopathologic correlation."	 	0.005639	1	1	KIT
Pubmed	17497650	Identification of novel alternatively spliced BRCA1-associated RING domain (BARD1) messenger RNAs in human peripheral blood lymphocytes and in sporadic breast cancer tissues.	 	0.005639	1	1	BARD1
Pubmed	14994370	c-Kit receptor (CD117) expression on myeloblasts and white blood cell counts in acute myeloid leukemia.	 	0.005639	1	1	KIT
Pubmed	14767552	Increased expression of IGF II mRNA-binding protein 1 mRNA is associated with an advanced clinical stage and poor prognosis in patients with ovarian cancer.	 	0.005639	1	1	IGF2BP1
Pubmed	18676753	"ASPM is a novel marker for vascular invasion, early recurrence, and poor prognosis of hepatocellular carcinoma."	 	0.005639	1	1	ASPM
Pubmed	17062577	Dimeric Eg5 maintains processivity through alternating-site catalysis with rate-limiting ATP hydrolysis.	 	0.005639	1	1	KIF11
Pubmed	9587421	Identification of a novel human glutathione S-transferase using bioinformatics.	 	0.005639	1	1	GSTA4
Pubmed	19170237	Centromere protein H is a novel prognostic marker for human nonsmall cell lung cancer progression and overall patient survival.	 	0.005639	1	1	CENPH
Pubmed	5577460	Haemoglobin Rampa: Alpha 95 Pro--Ser.	 	0.005639	1	1	HBA2
Pubmed	18411416	NOTCH1 extracellular juxtamembrane expansion mutations in T-ALL.	 	0.005639	1	1	NOTCH1
Pubmed	15817159	Constitutively active Notch1 induces growth arrest of HPV-positive cervical cancer cells via separate signaling pathways.	 	0.005639	1	1	NOTCH1
Pubmed	8681386	Structure and mechanism of inosine monophosphate dehydrogenase in complex with the immunosuppressant mycophenolic acid.	 	0.005639	1	1	IMPDH2
Pubmed	19350669	The role of cytomorphology and proliferative activity in predicting biologic behavior of pancreatic neuroendocrine tumors: a study by endoscopic ultrasound-guided fine-needle aspiration cytology.	 	0.005639	1	1	MKI67
Pubmed	18372436	Over-expression of GTP-cyclohydrolase 1 feedback regulatory protein attenuates LPS and cytokine-stimulated nitric oxide production.	 	0.005639	1	1	GCHFR
Pubmed	14592974	The crystal structure of the human polo-like kinase-1 polo box domain and its phospho-peptide complex.	 	0.005639	1	1	PLK1
Pubmed	11307949	Expression and properties of recombinant HbA2 (alpha2delta2) and hybrids containing delta-beta sequences.	 	0.005639	1	1	HBA2
Pubmed	16295759	[Expression of proliferation marker Ki 67 in chronic lymphocytic leukemia]	 	0.005639	1	1	MKI67
Pubmed	17124503	Piebald trait: implication of kit mutation on in vitro melanocyte survival and on the clinical application of cultured epidermal autografts.	 	0.005639	1	1	KIT
Pubmed	6382021	Sequence of a cDNA clone encoding human preproinsulin-like growth factor II.	 	0.005639	1	1	IGF2
Pubmed	17255290	Cyclin A immunocytology as a risk stratification tool for Barrett's esophagus surveillance.	 	0.005639	1	1	CCNA2
Pubmed	8193381	"Identification of a novel termination codon mutation (TAA-->TAT, Term-->Tyr) in the alpha 2 globin gene of a Laotian girl with hemoglobin H disease."	 	0.005639	1	1	HBA2
Pubmed	18547964	Polo-like kinase 1 as a new target for non-Hodgkin's lymphoma treatment.	 	0.005639	1	1	PLK1
Pubmed	17192788	IMP3 is a novel biomarker for adenocarcinoma in situ of the uterine cervix: an immunohistochemical study in comparison with p16(INK4a) expression.	 	0.005639	1	1	IGF2BP3
Pubmed	17911618	A role for EZH2 in silencing of IFN-gamma inducible MHC2TA transcription in uveal melanoma.	 	0.005639	1	1	EZH2
Pubmed	12874022	UbcH10 is the cancer-related E2 ubiquitin-conjugating enzyme.	 	0.005639	1	1	UBE2C
Pubmed	11465943	Autoimmune responses to mRNA binding proteins p62 and Koc in diverse malignancies.	 	0.005639	1	1	IGF2BP3
Pubmed	16714396	Survivin promoter polymorphism and cervical carcinogenesis.	 	0.005639	1	1	BIRC5
Pubmed	8724350	Histone-binding domains in a human nuclear autoantigenic sperm protein.	 	0.005639	1	1	NASP
Pubmed	1720553	Deletion of the c-kit protooncogene in the human developmental defect piebald trait.	 	0.005639	1	1	KIT
Pubmed	18223334	The oncofetal protein IMP3: a novel biomarker for endometrial serous carcinoma.	 	0.005639	1	1	IGF2BP3
Pubmed	9199503	"The neuronal nitric oxide synthase PDZ motif binds to -G(D,E)XV* carboxyterminal sequences."	 	0.005639	1	1	TRIP13
Pubmed	16979659	Visualizing the assembly of human Rad51 filaments on double-stranded DNA.	 	0.005639	1	1	RAD51
Pubmed	17636313	HMGB1 interacts with human topoisomerase IIalpha and stimulates its catalytic activity.	 	0.005639	1	1	TOP2A
Pubmed	11342143	"Evidence for the transport of neutral as well as cationic amino acids by ATA3, a novel and liver-specific subtype of amino acid transport system A."	 	0.005639	1	1	SLC38A4
Pubmed	19048483	Regulation of human alpha-globin gene expression and alpha-thalassemia.	 	0.005639	1	1	HBA2
Pubmed	18251156	Survivin gene expression in chronic liver disease and hepatocellular carcinoma.	 	0.005639	1	1	BIRC5
Pubmed	19411850	Depletion of BubR1 promotes premature centrosomal localization of cyclin B1 and accelerates mitotic entry.	 	0.005639	1	1	BUB1B
Pubmed	15539958	Chk1 is essential for tumor cell viability following activation of the replication checkpoint.	 	0.005639	1	1	CHEK1
Pubmed	2149166	Structure of the human melanin concentrating hormone mRNA.	 	0.005639	1	1	PMCH
Pubmed	16142334	Distinct expression of Survivin splice variants in breast carcinomas.	 	0.005639	1	1	BIRC5
Pubmed	17003365	Dynamic posttranscriptional regulation of epsilon-globin gene expression in vivo.	 	0.005639	1	1	HBE1
Pubmed	15370139	c-kit expression in adenoid cystic carcinoma of the breast.	 	0.005639	1	1	KIT
Pubmed	1569071	The identification of O-glycosylated precursors of insulin-like growth factor II.	 	0.005639	1	1	IGF2
Pubmed	16112421	The PLAGL1 gene is down-regulated in human extraskeletal myxoid chondrosarcoma tumors.	 	0.005639	1	1	PLAGL1
Pubmed	3007223	Immunostaining of transferrin and transferrin receptor in human seminiferous tubules.	 	0.005639	1	1	TFRC
Pubmed	18337018	"CD117 expression in normal, neoplastic, inflammatory, and reactive lesions of the thyroid."	 	0.005639	1	1	KIT
Pubmed	17392684	Identification of Notch-1 expression in the limbal basal epithelium.	 	0.005639	1	1	NOTCH1
Pubmed	17052979	"Properties of the type B histone acetyltransferase Hat1: H4 tail interaction, site preference, and involvement in DNA repair."	 	0.005639	1	1	HAT1
Pubmed	12579496	[The expression and imprinting status of insulin-like growth factor 2 gene in colorectal cancer]	 	0.005639	1	1	IGF2
Pubmed	16880534	Identification of a conserved negative regulatory sequence that influences the leukemogenic activity of NOTCH1.	 	0.005639	1	1	NOTCH1
Pubmed	11509238	Motor domain-dependent localization of myo1b (myr-1).	 	0.005639	1	1	MYO1B
Pubmed	17523619	Characterization of the galectin-1 carbohydrate recognition domain in terms of solvent occupancy.	 	0.005639	1	1	LGALS1
[truncated: 681,884 more chars]
