# Supplementary material for: Gene Expression Programs of Mouse Endothelial Cells in Kidney Development and Disease
Source: PLoS One. 2010 Aug 10;5(8):e12034. doi: 10.1371/journal.pone.0012034 (PMC2919381; doi:10.1371/journal.pone.0012034)
Supplement: Supplementary Data S4 — 207 genes with elevated expression in embryonic endothelia compared to other kidney embryonic compartments. (0.02 MB XLS) [file pone.0012034.s004.xls]

Transcripts Cluster Id	Fold change([bud] vs [15.5 renal endo])	Regulation([bud] vs [15.5 renal endo])	Fold change([renal vesicle] vs [15.5 renal endo])	Regulation([renal vesicle] vs [15.5 renal endo])	Fold change([stem cells] vs [15.5 renal endo])	Regulation([stem cells] vs [15.5 renal endo])	genesymbol	genedescription
10344966	2.3860776	down	4.3906927	down	3.5824113	down	Ly96	lymphocyte antigen 96
10345762	3.0363615	down	2.2737234	down	2.5227423	down	Il1r1	interleukin 1 receptor, type I
10346164	12.294119	down	9.156847	down	9.289927	down	Sdpr	serum deprivation response
10347931	19.128872	down	13.372618	down	11.508464	down	ENSMUSG00000068279
10348244	2.2979364	down	2.3065243	down	2.5121262	down	Inpp5d	inositol polyphosphate-5-phosphatase D
10350684	2.013355	down	2.3949926	down	2.3798673	down	Arpc5	actin related protein 2/3 complex, subunit 5
10350848	2.0629423	down	2.8809614	down	3.0145483	down	2810025M15Rik	RIKEN cDNA 2810025M15 gene
10351867	3.980522	down	7.4688	down	6.8207636	down	Aim2	absent in melanoma 2
10352905	6.69874	down	16.948408	down	18.161354	down	Cd34	CD34 antigen
10355050	2.2503626	down	2.3725836	down	2.7248476	down	Raph1	Ras association (RalGDS/AF-6) and pleckstrin homology domains 1
10355141	2.733267	down	2.0000384	down	3.1305149	down	Klf7	Kruppel-like factor 7 (ubiquitous)
10358879	4.2386136	down	3.009293	down	4.1895766	down	Npl	N-acetylneuraminate pyruvate lyase
10359480	3.2740042	down	3.5840657	down	3.0853424	down	Dnm3	dynamin 3
10362073	4.7769275	down	5.103091	down	5.2067976	down	Sgk1	serum/glucocorticoid regulated kinase 1
10365482	3.7773528	down	2.1541426	down	2.1323643	down	Timp3	tissue inhibitor of metalloproteinase 3
10365559	5.861272	down	10.468978	down	11.203933	down	Igf1	insulin-like growth factor 1
10366153	6.0450335	down	5.3552637	down	3.6564722	down	Rassf9	Ras association (RalGDS/AF-6) domain family (N-terminal) member 9
10366476	5.3841248	down	7.511877	down	7.538879	down	Ptprb	protein tyrosine phosphatase, receptor type, B
10367591	7.095216	down	11.032552	down	10.814532	down	Myct1	myc target 1
10368317	3.5922403	down	4.240631	down	4.3004136	down	Enpp3	ectonucleotide pyrophosphatase/phosphodiesterase 3
10369615	2.4735327	down	3.553169	down	3.0179398	down	Srgn	serglycin
10371959	2.4164996	down	2.7568235	down	2.2539237	down	Elk3	ELK3, member of ETS oncogene family
10372648	5.0847626	down	4.991201	down	4.8975716	down	Lyz2	lysozyme 2
10373325	5.791396	down	5.4156957	down	5.60692	down	Gpr182	G protein-coupled receptor 182
10374406	3.5197225	down	2.489356	down	2.0694463	down	Cnrip1	cannabinoid receptor interacting protein 1
10375051	15.161649	down	2.407927	down	3.3414443	down	Hba-a1|Hba-a2	hemoglobin alpha, adult chain 1 | hemoglobin alpha, adult chain 2
10375058	13.975658	down	2.5688643	down	3.532742	down	Hba-a2|Hba-a1	hemoglobin alpha, adult chain 2 | hemoglobin alpha, adult chain 1
10375578	2.1685407	down	3.208442	down	3.1799424	down	Flt4	FMS-like tyrosine kinase 4
10379615	5.3326993	down	4.998126	down	5.043789	down	Slfn5	schlafen 5
10379646	3.2512727	down	4.1134925	down	3.5837576	down	Slfn3	schlafen 3
10380571	5.974059	down	17.334959	down	20.042198	down	Gngt2	guanine nucleotide binding protein (G protein), gamma transducing activity polypeptide 2
10384656	3.147632	down	2.3058665	down	5.1203947	down	B3gnt2	UDP-GlcNAc:betaGal beta-1,3-N-acetylglucosaminyltransferase 2
10387368	4.052319	down	4.80359	down	4.642833	down	Tmem88	transmembrane protein 88
10387797	3.0711758	down	4.436565	down	4.4714074	down	Bcl6b	B-cell CLL/lymphoma 6, member B
10390186	2.4630973	down	3.0745304	down	3.2505655	down	Abi3	ABI gene family, member 3
10392177	4.549141	down	6.4073553	down	6.1376557	down	Icam2	intercellular adhesion molecule 2
10392221	7.4292846	down	16.30076	down	15.833012	down	Pecam1	platelet/endothelial cell adhesion molecule 1
10396074	2.7781296	down	2.303773	down	2.5395696	down	Mgat2	mannoside acetylglucosaminyltransferase 2
10396402	3.4369638	down	5.5855284	down	6.1314754	down	Prkch	protein kinase C, eta
10396419	4.935675	down	7.669189	down	8.962495	down
10397633	2.6696432	down	2.4953406	down	2.256203	down	Flrt2	fibronectin leucine rich transmembrane protein 2
10399148	2.530502	down	3.532965	down	4.8700643	down	Rapgef5	Rap guanine nucleotide exchange factor (GEF) 5
10399710	7.0634503	down	6.608312	down	8.010004	down	Rsad2	radical S-adenosyl methionine domain containing 2
10400006	2.6924958	down	2.2799144	down	2.192304	down	Ahr	aryl-hydrocarbon receptor
10400304	8.8506	down	11.26452	down	7.9836283	down	Egln3	EGL nine homolog 3 (C. elegans)
10400510	11.329949	down	12.66389	down	14.142869	down	Clec14a	C-type lectin domain family 14, member a
10400941	2.7676735	down	2.6013613	down	2.9687493	down	Dhrs7	dehydrogenase/reductase (SDR family) member 7
10403842	6.6376357	down	6.793827	down	7.7892194	down	Elmo1	engulfment and cell motility 1, ced-12 homolog (C. elegans)
10406434	4.1206145	down	5.576934	down	4.0315332	down	Mef2c	myocyte enhancer factor 2C
10407126	4.5425386	down	8.747151	down	4.493556	down	Plk2	polo-like kinase 2 (Drosophila)
10407211	7.3656487	down	7.413865	down	7.147053	down	Ppap2a	phosphatidic acid phosphatase 2a
10407281	5.117375	down	5.889083	down	6.3528447	down	Esm1|LOC632677	endothelial cell-specific molecule 1 | similar to Endothelial cell-specific molecule 1 precursor (ESM-1 secretory protein) (ESM-1)
10407766	2.901058	down	2.6676304	down	2.1839442	down	Lgals8	lectin, galactose binding, soluble 8
10409876	9.242257	down	30.54941	down	30.101624	down	Ctla2a	cytotoxic T lymphocyte-associated protein 2 alpha
10413047	2.908934	down	2.4528043	down	3.1578856	down	Plau	plasminogen activator, urokinase
10416437	3.642338	down	6.600301	down	7.1276803	down	Lcp1	lymphocyte cytosolic protein 1
10416700	4.6326795	down	3.4161363	down	5.388408	down	Pcdh17	protocadherin 17
10417704	2.0500326	down	2.1461678	down	2.1846163	down	Lrrc3b	leucine rich repeat containing 3B
10418506	2.81718	down	3.160868	down	3.273273	down	Stab1	stabilin 1
10420171	2.2205508	down	2.6866891	down	2.5790732	down	Adcy4	adenylate cyclase 4
10422164	3.7441711	down	13.748286	down	12.984079	down	Ednrb	endothelin receptor type B
10422496	2.8844361	down	3.3761292	down	3.556004	down	Ebi2	Epstein-Barr virus induced gene 2
10422598	4.6182413	down	3.8900516	down	2.2105222	down	Sepp1	selenoprotein P, plasma, 1
10423505	2.2447295	down	2.5296373	down	2.2478461	down	Cmbl	carboxymethylenebutenolidase-like (Pseudomonas)
10424695	5.057685	down	4.1387014	down	4.9250813	down	Gpihbp1	GPI-anchored HDL-binding protein 1
10434778	2.6323466	down	2.0578382	down	2.2486205	down	Rtp4	receptor transporter protein 4
10435271	4.739329	down	2.0444686	down	3.1084712	down	Heg1	HEG homolog 1 (zebrafish)
10436182	2.5308542	down	2.979577	down	3.3693426	down	Cd47	CD47 antigen (Rh-related antigen, integrin-associated signal transducer)
10438445	5.4436107	down	9.858344	down	8.966874	down	Klhl6	kelch-like 6 (Drosophila)
10439058	2.3584487	down	2.914332	down	2.8861012	down	Lrrc33	leucine rich repeat containing 33
10439218	2.7266424	down	2.9826188	down	3.9007094	down	Pdia5	protein disulfide isomerase associated 5
10439651	2.9862585	down	3.7201824	down	5.1839457	down	Cd200
10441093	5.015623	down	7.1577735	down	7.7920566	down	Erg	avian erythroblastosis virus E-26 (v-ets) oncogene related
10445268	7.1542635	down	11.524432	down	11.117905	down	Gpr116	G protein-coupled receptor 116
10446965	5.2700987	down	27.48358	down	27.787449	down	Rasgrp3	RAS, guanyl releasing protein 3
10447317	3.6990652	down	3.1661868	down	3.5616171	down	Epas1	endothelial PAS domain protein 1
10448676	2.952315	down	2.5848796	down	3.1323655	down	Slc9a3r2	solute carrier family 9 (sodium/hydrogen exchanger), member 3 regulator 2
10448836	3.1608534	down	3.7466395	down	3.0337534	down	Tmem204	transmembrane protein 204
10449284	2.2820878	down	2.1482947	down	2.1360219	down	Dusp1	dual specificity phosphatase 1
10450075	3.189633	down	4.79708	down	4.4466314	down	H2-K1	histocompatibility 2, K1, K region
10458303	3.259508	down	3.922839	down	4.0329676	down	1110006O17Rik	RIKEN cDNA 1110006O17 gene
10459353	3.2635472	down	4.3013067	down	3.4601989	down
10461723	2.4077013	down	2.932253	down	3.5657878	down	4632417K18Rik	RIKEN cDNA 4632417K18 gene
10462818	3.2640553	down	7.9696	down	7.440062	down	Hhex	hematopoietically expressed homeobox
10463070	6.235119	down	6.276632	down	6.9058566	down	Entpd1	ectonucleoside triphosphate diphosphohydrolase 1
10465132	2.6599839	down	2.301293	down	2.4953537	down	Sipa1	signal-induced proliferation associated gene 1
10466573	2.9165597	down	3.2813375	down	2.8566668	down	Ostf1	osteoclast stimulating factor 1
10466606	5.1550717	down	7.1393185	down	6.9689045	down	Anxa1	annexin A1
10469066	13.911658	down	15.120812	down	11.386873	down	Ccdc3	coiled-coil domain containing 3
10469322	3.1114922	down	2.9829075	down	2.4292612	down	Vim	vimentin
10470283	4.549527	down	6.39823	down	6.9587173	down	Egfl7	EGF-like domain 7
10471486	3.6898193	down	4.7026525	down	4.361506	down	Eng	endoglin
10471503	2.0323467	down	4.8036294	down	3.79343	down
10471721	3.785328	down	4.358882	down	3.7116306	down	Ptgs1	prostaglandin-endoperoxide synthase 1
10473384	3.4114347	down	2.5974092	down	2.8973248	down	Slc43a3	solute carrier family 43, member 3
10473444	4.487861	down	39.083942	down	33.93354	down	Agtrl1	angiotensin receptor-like 1
10474915	2.5433774	down	7.7565174	down	9.091295	down	Gchfr	GTP cyclohydrolase I feedback regulator
10475218	2.7628512	down	2.16054	down	2.0235984	down	Stard9	START domain containing 9
10475414	3.2772448	down	5.1347513	down	5.0588217	down	B2m	beta-2 microglobulin
10476321	6.8431435	down	6.9243054	down	8.779853	down	Prnd	prion protein dublet
10477717	4.078753	down	4.2346535	down	4.4512014	down	Procr	protein C receptor, endothelial
10482517	6.5199037	down	2.5455976	down	2.7540278	down	Nmi	N-myc (and STAT) interactor
10484389	3.9060597	down	3.0343711	down	2.2322237	down	Tfpi	tissue factor pathway inhibitor
10486396	4.719917	down	4.677257	down	5.123769	down	Ehd4	EH-domain containing 4
10488147	2.7203393	down	3.5050368	down	2.8407538	down	Flrt3|LOC100048721	fibronectin leucine rich transmembrane protein 3 | similar to fibronectin leucine rich transmembrane protein 3
10488382	6.3796325	down	26.135592	down	23.30377	down	Cd93	CD93 antigen
10489391	5.139959	down	4.981984	down	5.319412	down	Ada	adenosine deaminase
10490731	2.0863426	down	2.7382429	down	2.4155054	down	Sox18	SRY-box containing gene 18
10493604	3.7527359	down	5.278182	down	6.1975975	down	She	src homology 2 domain-containing transforming protein E
10493789	3.904272	down	2.9514976	down	3.1980684	down	S100a13	S100 calcium binding protein A13
10493798	3.9288752	down	2.4418302	down	6.7255173	down	S100a16	S100 calcium binding protein A16
10493995	11.96591	down	5.760544	down	8.166244	down	S100a10	S100 calcium binding protein A10 (calpactin)
10495685	3.3760612	down	2.289003	down	5.902798	down	Arhgap29	Rho GTPase activating protein 29
10496359	5.142605	down	37.237843	down	36.6858	down	Emcn	endomucin
10496872	7.959657	down	16.200268	down	15.225711	down	Eltd1	EGF, latrophilin seven transmembrane domain containing 1
10497265	50.550205	down	22.412672	down	24.133251	down	Fabp4	fatty acid binding protein 4, adipocyte
10497862	6.2057023	down	9.42282	down	9.004447	down	Trpc3	transient receptor potential cation channel, subfamily C, member 3
10498273	9.00709	down	6.901181	down	4.792416	down	Tm4sf1	transmembrane 4 superfamily member 1
10498576	3.3980825	down	4.3123755	down	4.3519	down	Lxn	latexin
10500276	5.85117	down	6.6419964	down	5.3548403	down	BC028528
10503098	2.5793962	down	4.100277	down	4.1215	down	Lyn	Yamaguchi sarcoma viral (v-yes-1) oncogene homolog
10503107	2.4038765	down	2.311516	down	2.1113126	down	6330407A03Rik	RIKEN cDNA 6330407A03 gene
10503334	4.2182646	down	4.2683487	down	4.0399528	down	Gem	GTP binding protein (gene overexpressed in skeletal muscle)
10504668	2.0984187	down	2.929561	down	2.994563	down
10505954	8.290499	down	17.779032	down	23.061216	down	Tek	endothelial-specific receptor tyrosine kinase
10514049	8.005369	down	8.884922	down	9.647884	down	Nfib	nuclear factor I/B
10514054	4.9582834	down	5.436077	down	7.238341	down	Nfib	nuclear factor I/B
10515771	3.376608	down	4.082338	down	4.3402505	down	Tie1	tyrosine kinase receptor 1
10516637	4.667133	down	5.208011	down	5.623058	down	BC030183
10517287	2.3966572	down	2.6988726	down	3.0168827	down	Man1c1	mannosidase, alpha, class 1C, member 1
10517609	3.128772	down	3.2443347	down	3.3603022	down	Cda	cytidine deaminase
10520965	2.3596675	down	2.9189823	down	2.5883029	down	Yes1	Yamaguchi sarcoma viral (v-yes) oncogene homolog 1
10521678	5.0770345	down	10.132164	down	12.035111	down	Cd38	CD38 antigen
10523134	18.9926	down	15.34426	down	16.024244	down	Pf4	platelet factor 4
10523451	4.91888	down	4.8154883	down	6.792682	down	Anxa3	annexin A3
10523766	4.0028925	down	3.226952	down	4.283434	down	Lrrc8c	leucine rich repeat containing 8 family, member C
10525397	2.1406984	down	3.2744622	down	3.122464	down	Arpc3	actin related protein 2/3 complex, subunit 3
10527441	2.596387	down	2.7296457	down	2.6237645	down	Arpc1b	actin related protein 2/3 complex, subunit 1B
10528207	8.405821	down	8.431247	down	8.19715	down	Cd36	CD36 antigen
10529875	6.3577914	down	9.131695	down	4.657879	down	Ldb2	LIM domain binding 2
10530692	4.765454	down	12.637088	down	12.547489	down	Kdr	kinase insert domain protein receptor
10531931	7.973252	down	3.2954254	down	3.0273287	down	Sparcl1	SPARC-like 1 (mast9, hevin)
10531980	2.4767017	down	2.378908	down	2.975136	down	BC057170
10535732	2.3716218	down	2.7702084	down	2.7354214	down	Gpr12	G-protein coupled receptor 12
10535807	6.6454	down	9.218074	down	11.067686	down	Flt1	FMS-like tyrosine kinase 1
10536494	4.265039	down	3.4021306	down	6.442185	down	Cav2	caveolin 2
10536499	3.7426271	down	2.8296978	down	6.6136346	down	Cav1	caveolin, caveolae protein 1
10538123	4.3904705	down	6.799387	down	6.159502	down	Gimap9	GTPase, IMAP family member 9
10538126	11.374746	down	21.21522	down	24.230295	down	Gimap4	GTPase, IMAP family member 4
10538138	2.6821713	down	3.8059938	down	3.7731428	down	Gimap1	GTPase, IMAP family member 1
10538142	5.2797437	down	7.160601	down	6.526391	down	Gimap5	GTPase, IMAP family member 5
10538640	3.3013473	down	3.9578133	down	3.1741524	down	Abcg2	ATP-binding cassette, sub-family G (WHITE), member 2
10539517	2.9848444	down	4.1540656	down	4.5358205	down	Dysf	dysferlin
10542355	3.4675581	down	3.3811376	down	3.6257002	down	Emp1	epithelial membrane protein 1
10542981	7.3430333	down	14.245743	down	18.48232	down	Gmfg	glia maturation factor, gamma
10543004	2.3011954	down	2.300121	down	2.9348485	down	Pon2	paraoxonase 2
10543120	3.795547	down	4.0865808	down	3.3196013	down	Ica1	islet cell autoantigen 1
10544583	4.4870396	down	17.120127	down	15.467812	down	Gimap6	GTPase, IMAP family member 6
10545401	4.8807592	down	5.7979827	down	6.290985	down	Vamp5	vesicle-associated membrane protein 5
10547100	4.4302907	down	3.9833422	down	6.1120677	down	Plxnd1	plexin D1
10548367	2.9157069	down	3.3504984	down	3.4294868	down	Clec1a	C-type lectin domain family 1, member a
10548761	2.938269	down	2.5965843	down	2.164389	down	Hebp1	heme binding protein 1
10551185	2.9978895	down	3.1171062	down	3.1459012	down	Tgfb1	transforming growth factor, beta 1
10553042	2.1433887	down	2.3677127	down	2.6002772	down	Rasip1	Ras interacting protein 1
10562192	4.836219	down	9.3972225	down	6.0602655	down	Fxyd5	FXYD domain-containing ion transport regulator 5
10566454	2.7143245	down	2.9929876	down	3.160163	down	Prkcdbp	protein kinase C, delta binding protein
10566583	2.0156648	down	2.522634	down	2.637653	down	EG668139
10566926	2.7293851	down	3.121785	down	3.223478	down	Rnf141	ring finger protein 141
10566934	2.5028894	down	2.6765752	down	2.652218	down	Lyve1	lymphatic vessel endothelial hyaluronan receptor 1
10569017	5.31657	down	2.754057	down	2.4844496	down	Ifitm3	interferon induced transmembrane protein 3
10571815	3.748671	down	2.4978385	down	3.7479959	down	Gpm6a	glycoprotein m6a
10572897	3.0639083	down	3.6882293	down	3.9918141	down	Hmox1	heme oxygenase (decycling) 1
10573082	3.3287017	down	2.8534913	down	2.6184254	down	Inpp4b	inositol polyphosphate-4-phosphatase, type II
10574276	2.191838	down	2.2375894	down	2.224566	down	Gpr97	G protein-coupled receptor 97
10574438	5.352298	down	23.576647	down	24.973587	down	Cdh5	cadherin 5
10577641	3.1739864	down	7.3294983	down	7.6607404	down	1810011O10Rik	RIKEN cDNA 1810011O10 gene
10578880	2.006289	down	2.5002618	down	2.5828702	down	Tll1	tolloid-like
10579012	2.3579469	down	3.1164572	down	3.2248657	down	Csgalnact1	chondroitin sulfate N-acetylgalactosaminyltransferase 1
10580033	7.673682	down	6.175467	down	6.009951	down	Cd97	CD97 antigen
10580582	2.4752035	down	2.23521	down	2.6305287	down	LOC626493
10580782	2.004781	down	2.1162891	down	2.2181287	down	Dok4	docking protein 4
10581197	2.5656426	down	2.600511	down	2.4993265	down	Exoc3l	exocyst complex component 3-like
10582997	2.9573183	down	2.496018	down	2.405683	down	Casp4|LOC100044206	caspase 4, apoptosis-related cysteine peptidase | hypothetical protein LOC100044206
10584142	2.0116928	down	2.6267042	down	3.1192508	down	Ets1	E26 avian leukemia oncogene 1, 5' domain
10584288	2.8739767	down	3.084797	down	3.2497802	down	Robo4	roundabout homolog 4 (Drosophila)
10584325	4.1499405	down	3.4630957	down	4.032361	down	Vsig2	V-set and immunoglobulin domain containing 2
10586017	2.633799	down	3.0027347	down	2.2958858	down	Uaca	uveal autoantigen with coiled-coil domains and ankyrin repeats
10586118	9.776442	down	3.5128224	down	3.7560527	down	Calml4	calmodulin-like 4
10586744	6.378762	down	2.410246	down	3.3221774	down	Anxa2	annexin A2
10587383	3.6622136	down	4.0424776	down	4.5121746	down	Cd109	CD109 antigen
10587733	5.1395683	down	5.321144	down	5.8737745	down	Ctsh	cathepsin H
10589695	6.073486	down	5.361627	down	5.4723225	down	Rtp3	receptor transporter protein 3
10592067	2.010553	down	7.902522	down	6.8583913	down	Fli1	Friend leukemia integration 1
10596148	2.053699	down	2.3609266	down	2.4133077	down	Trf	transferrin
10596812	2.7134051	down	4.887909	down	2.8954809	down	6230427J02Rik	RIKEN cDNA 6230427J02 gene
10601412	2.5907986	down	5.749234	down	3.66386	down	Lpar4	lysophosphatidic acid receptor 4
10601519	9.345558	down	24.135565	down	20.412477	down	Klhl4	kelch-like 4 (Drosophila)
10602739	2.8277242	down	2.9339204	down	3.4007623	down	Acot9	acyl-CoA thioesterase 9
10604175	2.9789548	down	16.284336	down	18.32644	down	6430550H21Rik	RIKEN cDNA 6430550H21 gene
10604393	3.3146293	down	2.3155344	down	2.5849183	down	Elf4	E74-like factor 4 (ets domain transcription factor)
10604763	2.850898	down	2.7754204	down	2.7867246	down	Arpc1b	actin related protein 2/3 complex, subunit 1B
10605370	3.4298496	down	3.748463	down	2.6358237	down	Mpp1	membrane protein, palmitoylated
10605392	5.1143126	down	6.114763	down	4.8660626	down	F8	coagulation factor VIII
10606016	6.740189	down	7.2216086	down	6.2669926	down	Il2rg	interleukin 2 receptor, gamma chain
10606369	3.3562262	down	5.9665823	down	4.672952	down	Itm2a	integral membrane protein 2A
10607403	3.9150155	down	4.329568	down	2.8096294	down	Kctd12b	potassium channel tetramerisation domain containing 12b
10607467	3.959462	down	5.6725497	down	4.5490146	down	Sat1	spermidine/spermine N1-acetyl transferase 1
