# Supplementary material for: Gene Expression Programs of Mouse Endothelial Cells in Kidney Development and Disease
Source: PLoS One. 2010 Aug 10;5(8):e12034. doi: 10.1371/journal.pone.0012034 (PMC2919381; doi:10.1371/journal.pone.0012034)
Supplement: Supplementary Data S7 — List of twelve genes with over 4 fold elevated expression in glomerular endothelial cells. (0.04 MB XLS) [file pone.0012034.s007.xls]

## Sheet: Sheet1
Transcripts Cluster Id	genesymbol	genedescription	Fold change([cort] vs [glom])	Fold change([med] vs [glom])
10423520	Sema5a	sema domain, seven thrombospondin repeats (type 1 and type 1-like), transmembrane domain (TM) and short cytoplasmic domain, (semaphorin) 5A	6.13812	15.5113
10483353	Scn7a	sodium channel, voltage-gated, type VII, alpha	11.0337	14.3898
10544588	Gimap3	GTPase, IMAP family member 3	4.63608	12.9104
10440534	Adamts5	a disintegrin-like and metallopeptidase (reprolysin type) with thrombospondin type 1 motif, 5 (aggrecanase-2)	5.29044	9.24834
10589685	Lrrc2	leucine rich repeat containing 2	6.24909	7.96682
10490491	Gata5	GATA binding protein 5	6.48987	7.5471
10574572	2210023G05Rik	RIKEN cDNA 2210023G05 gene	4.13367	7.46187
10472514	Nostrin	nitric oxide synthase trafficker	4.43636	6.7267
10446777	Ehd3	EH-domain containing 3	8.80101	5.89231
10421853	Lect1	leukocyte cell derived chemotaxin 1	5.07351	5.87807
10598626	Tspan7	tetraspanin 7	4.27319	5.80333
10472034	Lypd6	LY6/PLAUR domain containing 6	4.70569	5.4275
