# Supplementary material for: Gene Expression Programs of Mouse Endothelial Cells in Kidney Development and Disease
Source: PLoS One. 2010 Aug 10;5(8):e12034. doi: 10.1371/journal.pone.0012034 (PMC2919381; doi:10.1371/journal.pone.0012034)
Supplement: Supplementary Data S9 — List of genes with elevated expression in cortical endothelial cells. (0.06 MB XLS) [file pone.0012034.s009.xls]

## Sheet: Sheet1
genesymbol	Fold change([15.5] vs [endo])	Regulation([15.5] vs [endo])	Fold change([dbglom] vs [endo])	Regulation([dbglom] vs [endo])	Fold change([glomwt] vs [endo])	Regulation([glomwt] vs [endo])	Fold change([med] vs [endo])	Regulation([med] vs [endo])	genedescription
Kap	152.833	down	117.078	down	127.815	down	167.47	down	kidney androgen regulated protein
Gpx3	44.7847	down	76.2239	down	82.1985	down	82.9568	down	glutathione peroxidase 3
Keg1	72.6875	down	73.9654	down	76.317	down	80.5336	down	kidney expressed gene 1
Spink3	48.0273	down	72.3315	down	62.9536	down	67.9163	down	serine peptidase inhibitor, Kazal type 3
Slc27a2	52.8909	down	63.8086	down	61.6046	down	67.1535	down	solute carrier family 27 (fatty acid transporter), member 2
Cyp2j5	56.7141	down	57.2437	down	50.833	down	55.7708	down	cytochrome P450, family 2, subfamily j, polypeptide 5
Klk1b5	42.3831	down	26.9507	down	37.66	down	47.2898	down	kallikrein 1-related peptidase b5 | kallikrein 1
Ugt2b38	33.72	down	45.0892	down	41.4942	down	43.8113	down	UDP glucuronosyltransferase 2 family, polypeptide B38
Rgs5	57.1995	down	81.2369	down	63.6377	down	35.3866	down	regulator of G-protein signaling 5
Mgp	14.5953	down	5.79987	down	8.76892	down	33.1975	down	matrix Gla protein
Sult1d1	27.0723	down	36.41	down	30.2451	down	31.0756	down	sulfotransferase family 1D, member 1
Aldob	26.3951	down	33.2717	down	31.7109	down	29.6936	down	aldolase 2, B isoform
Acsm2	26.2468	down	29.8536	down	28.0168	down	28.9168	down	acyl-CoA synthetase medium-chain family member 2
Tmem27	23.0698	down	33.9489	down	28.1412	down	28.2655	down	transmembrane protein 27
Cyp4a12a|Cyp4a12b	28.0474	down	26.7187	down	25.2967	down	27.2367	down	cytochrome P450, family 4, subfamily a, polypeptide 12a | cytochrome P450, family 4, subfamily a, polypeptide 12B
Slc5a12	27.5802	down	28.1038	down	25.582	down	27.121	down	solute carrier family 5 (sodium/glucose cotransporter), member 12
Cyp2e1	25.8932	down	27.9006	down	24.5882	down	27.1005	down	cytochrome P450, family 2, subfamily e, polypeptide 1
Miox	23.5987	down	24.4737	down	23.0436	down	26.2901	down	myo-inositol oxygenase
Slc17a3	24.4793	down	26.8065	down	25.5352	down	25.3329	down	solute carrier family 17 (sodium phosphate), member 3
S100g	23.5225	down	10.8659	down	16.2452	down	22.3427	down	S100 calcium binding protein G
C730048C13Rik	22.3678	down	23.2236	down	21.7803	down	22.1699	down	RIKEN cDNA C730048C13 gene
Akr1c21	21.2747	down	22.5527	down	20.6895	down	21.8739	down	aldo-keto reductase family 1, member C21
AU018778	20.4868	down	19.394	down	20.0407	down	21.5212	down
Hrsp12	5.61421	down	13.6129	down	12.8456	down	20.5595	down	heat-responsive protein 12
Rgs5	29.2067	down	35.356	down	30.7824	down	19.8139	down	regulator of G-protein signaling 5
Hgd	17.8875	down	21.4057	down	19.7669	down	19.3438	down	homogentisate 1, 2-dioxygenase
C730048C13Rik|EG434674	15.1696	down	19.0214	down	17.0186	down	18.2066	down	RIKEN cDNA C730048C13 gene | predicted gene, EG434674
Tmem174	15.208	down	18.9642	down	17.271	down	17.9345	down	transmembrane protein 174
Slc7a13	15.9367	down	17.5336	down	17.0058	down	17.7035	down	solute carrier family 7, (cationic amino acid transporter, y+ system) member 13
Slc17a1	19.8472	down	21.6575	down	23.8204	down	17.3101	down	solute carrier family 17 (sodium phosphate), member 1
Aspn	7.43028	down	17.3881	down	16.1745	down	16.742	down	asporin
Calb1	11.4316	down	7.71064	down	14.9497	down	16.2935	down	calbindin-28K
Spp2	14.5721	down	14.4486	down	13.99	down	16.1626	down	secreted phosphoprotein 2
Slc4a4	14.629	down	15.8844	down	16.2758	down	15.2326	down	solute carrier family 4 (anion exchanger), member 4
Ren2|Ren1	16.066	down	16.0407	down	15.8073	down	14.723	down	renin 2 tandem duplication of Ren1 | renin 1 structural
Slc13a1	13.6205	down	14.7277	down	13.9762	down	14.3353	down	solute carrier family 13 (sodium/sulphate symporters), member 1
Pecr	4.71569	down	9.92489	down	8.91835	down	13.6348	down	peroxisomal trans-2-enoyl-CoA reductase
Slc34a1	14.8353	down	15.2842	down	14.7228	down	13.1036	down	solute carrier family 34 (sodium phosphate), member 1
Lrp2	12.6839	down	13.7528	down	12.8289	down	13.0488	down	low density lipoprotein receptor-related protein 2
Kcnj16	18.0511	down	18.9735	down	18.5934	down	12.8375	down	potassium inwardly-rectifying channel, subfamily J, member 16
Gsta1|Gsta2|ENSMUSG00000074179|LOC100042295	7.97737	down	11.7802	down	10.9794	down	12.3687	down	glutathione S-transferase, alpha 1 (Ya) | glutathione S-transferase, alpha 2 (Yc2) | predicted gene, ENSMUSG00000074179 | similar to Glutathione S-transferase, alpha 1 (Ya)
Atp6v1g3	13.9894	down	15.8639	down	15.6863	down	11.9665	down	ATPase, H+ transporting, lysosomal V1 subunit G3
Cyp4a12b	10.0422	down	11.7068	down	10.9254	down	11.8984	down	cytochrome P450, family 4, subfamily a, polypeptide 12B
Fbp1	9.70935	down	11.0337	down	11.1779	down	11.3819	down	fructose bisphosphatase 1
Ugt3a2	10.6097	down	11.413	down	10.1111	down	11.1016	down	UDP glycosyltransferases 3 family, polypeptide A2
EG432466|Ass1	15.7483	down	5.85217	down	5.24579	down	10.3551	down	predicted gene, EG432466 | argininosuccinate synthetase 1
Acta2	6.29926	down	6.17748	down	7.75498	down	10.1359	down	actin, alpha 2, smooth muscle, aorta
EG432466|Ass1	15.0207	down	5.81662	down	5.19431	down	10.0538	down	predicted gene, EG432466 | argininosuccinate synthetase 1
Bdh2	9.65902	down	9.88215	down	11.4187	down	9.80883	down	3-hydroxybutyrate dehydrogenase, type 2
Gsta1|ENSMUSG00000074179|Gsta2|LOC100042295	6.43189	down	9.3026	down	8.50887	down	9.7936	down	glutathione S-transferase, alpha 1 (Ya) | predicted gene, ENSMUSG00000074179 | glutathione S-transferase, alpha 2 (Yc2) | similar to Glutathione S-transferase, alpha 1 (Ya)
Defb1	18.1336	down	18.1024	down	20.4193	down	9.52378	down	defensin beta 1
Ugt3a1|Ugt3a2	7.08141	down	10.4542	down	9.89699	down	9.42556	down	UDP glycosyltransferases 3 family, polypeptide A1 | UDP glycosyltransferases 3 family, polypeptide A2
Tinag	7.38127	down	9.57399	down	8.84808	down	9.30301	down	tubulointerstitial nephritis antigen
Pdzk1	10.9606	down	8.96695	down	8.58645	down	9.10562	down	PDZ domain containing 1
Fggy	5.84971	down	6.48983	down	8.05947	down	9.02365	down	FGGY carbohydrate kinase domain containing
Cyp2j13	9.8826	down	9.41938	down	8.90356	down	8.98865	down	cytochrome P450, family 2, subfamily j, polypeptide 13
Ugt3a1	7.11283	down	8.81484	down	8.73194	down	8.9656	down	UDP glycosyltransferases 3 family, polypeptide A1
Sdc2	7.92901	down	13.2997	down	11.5141	down	8.75302	down	syndecan 2
Ugt3a1	6.24812	down	9.09503	down	8.41646	down	8.63369	down	UDP glycosyltransferases 3 family, polypeptide A1
Acsm3	5.93442	down	8.13982	down	7.45743	down	8.25913	down	acyl-CoA synthetase medium-chain family member 3
ENSMUSG00000074828	7.09896	down	7.88353	down	6.01783	down	8.18016	down
Pvalb	7.57181	down	5.76286	down	7.44476	down	8.16005	down	parvalbumin
Me1	9.19132	down	7.95512	down	7.85298	down	8.08342	down	malic enzyme 1, NADP(+)-dependent, cytosolic
Gsta2|ENSMUSG00000074179|Gsta1|LOC100042295	5.22773	down	8.28687	down	7.37438	down	8.07444	down	glutathione S-transferase, alpha 2 (Yc2) | predicted gene, ENSMUSG00000074179 | glutathione S-transferase, alpha 1 (Ya) | similar to Glutathione S-transferase, alpha 1 (Ya)
Prkar2b	4.59704	down	9.09864	down	5.96843	down	7.93178	down	protein kinase, cAMP dependent regulatory, type II beta
ENSMUSG00000074179|Gsta2|Gsta1	5.4498	down	7.87732	down	6.83099	down	7.92829	down	predicted gene, ENSMUSG00000074179 | glutathione S-transferase, alpha 2 (Yc2) | glutathione S-transferase, alpha 1 (Ya)
Hsd3b4|LOC100043456	5.80034	down	9.56895	down	7.81032	down	7.84884	down	hydroxy-delta-5-steroid dehydrogenase, 3 beta- and steroid delta-isomerase 4 | similar to 3-beta-hydroxysteroid dehydrogenase/delta-5-delta-4-isomerase
Hsd3b4|LOC100043456	5.78793	down	9.5695	down	7.8075	down	7.84615	down	hydroxy-delta-5-steroid dehydrogenase, 3 beta- and steroid delta-isomerase 4 | similar to 3-beta-hydroxysteroid dehydrogenase/delta-5-delta-4-isomerase
Slco1a6	7.47417	down	7.73466	down	7.64352	down	7.74049	down	solute carrier organic anion transporter family, member 1a6
Pah	7.27058	down	7.93311	down	7.95635	down	7.66758	down	phenylalanine hydroxylase
Aspa	7.53763	down	7.33532	down	6.86828	down	7.64874	down	aspartoacylase
Acy3	6.87442	down	6.62521	down	7.27463	down	7.61322	down	aspartoacylase (aminoacylase) 3
Glyat	6.38418	down	7.19584	down	6.99634	down	7.50305	down	glycine-N-acyltransferase
Pank1	5.1813	down	5.53604	down	5.23426	down	7.38819	down	pantothenate kinase 1
Atp1b2	8.23273	down	4.86962	down	5.77284	down	7.36752	down	ATPase, Na+/K+ transporting, beta 2 polypeptide
Hsd3b2	8.54626	down	7.76981	down	7.62015	down	7.25983	down	hydroxy-delta-5-steroid dehydrogenase, 3 beta- and steroid delta-isomerase 2
Aass	6.98325	down	7.26432	down	6.85691	down	7.11186	down	aminoadipate-semialdehyde synthase
Mep1a	5.11136	down	6.47053	down	6.05333	down	7.10509	down	meprin 1 alpha
Nr1h4	6.70348	down	7.63138	down	7.3347	down	7.09202	down	nuclear receptor subfamily 1, group H, member 4
Nox4	4.07364	down	8.15919	down	7.7305	down	7.02092	down	NADPH oxidase 4
Adh1	11.991	down	19.4652	down	18.3303	down	6.76029	down	alcohol dehydrogenase 1 (class I)
Vegfc	4.17055	down	5.35227	down	4.59695	down	6.75072	down	vascular endothelial growth factor C
Mia2	8.05158	down	9.6026	down	8.56557	down	6.56078	down	melanoma inhibitory activity 2
A1cf	6.50984	down	6.56044	down	6.1444	down	6.53159	down	APOBEC1 complementation factor
Me1	7.34752	down	6.41681	down	6.74409	down	6.49944	down	malic enzyme 1, NADP(+)-dependent, cytosolic
Gpc4	6.09208	down	9.48758	down	9.08696	down	6.30483	down	glypican 4
Cubn	6.49704	down	6.65048	down	6.15946	down	6.28764	down	cubilin (intrinsic factor-cobalamin receptor)
Fah	6.26173	down	8.34606	down	5.70242	down	6.12679	down	fumarylacetoacetate hydrolase
Lactb2	6.65768	down	4.00297	down	3.22716	down	6.11432	down	lactamase, beta 2
Aadac	5.19703	down	6.00117	down	5.60667	down	6.03644	down	arylacetamide deacetylase (esterase)
Olfr558	5.92969	down	6.09984	down	5.76274	down	5.93423	down	olfactory receptor 558
Fut9	5.92919	down	6.06855	down	5.8917	down	5.80647	down	fucosyltransferase 9
Sult1c2	5.28835	down	5.79716	down	5.30961	down	5.72154	down	sulfotransferase family, cytosolic, 1C, member 2
Kcnj15	5.3841	down	5.45147	down	6.42008	down	5.62026	down	potassium inwardly-rectifying channel, subfamily J, member 15
Slc7a7	4.27218	down	5.40125	down	4.43042	down	5.44823	down	solute carrier family 7 (cationic amino acid transporter, y+ system), member 7
C730036D15Rik	4.24213	down	5.43684	down	4.70057	down	5.41865	down	RIKEN cDNA C730036D15 gene
1810022C23Rik	4.73823	down	5.10139	down	4.65375	down	5.25961	down	RIKEN cDNA 1810022C23 gene
Slc12a1	14.3438	down	14.0458	down	13.3998	down	5.24712	down	solute carrier family 12, member 1
Akr1b7	4.74174	down	4.50521	down	4.34284	down	5.07125	down	aldo-keto reductase family 1, member B7
Myh11	5.45372	down	5.71892	down	5.24986	down	5.06271	down	myosin, heavy polypeptide 11, smooth muscle
Cml3	5.16662	down	5.32746	down	5.12675	down	4.98987	down	camello-like 3
Npnt	8.00693	down	9.26445	down	4.0911	down	4.9588	down	nephronectin
D630023F18Rik	4.95109	down	5.86425	down	5.65534	down	4.94314	down	RIKEN cDNA D630023F18 gene
Atp6v0d2	4.47002	down	4.71068	down	4.45628	down	4.92438	down	ATPase, H+ transporting, lysosomal V0 subunit D2
Cyp2j11	4.63631	down	4.82454	down	4.23138	down	4.9124	down	cytochrome P450, family 2, subfamily j, polypeptide 11
Kng2	6.03056	down	5.86585	down	5.95976	down	4.90299	down	kininogen 2
Ppargc1a	11.645	down	9.26192	down	9.20366	down	4.89909	down	peroxisome proliferative activated receptor, gamma, coactivator 1 alpha
Ggt1	4.78789	down	5.5782	down	5.10543	down	4.88127	down	gamma-glutamyltransferase 1
Atp6v0a4	5.42467	down	5.77118	down	5.62098	down	4.83283	down	ATPase, H+ transporting, lysosomal V0 subunit A4
Egf	5.78665	down	7.634	down	7.11318	down	4.81738	down	epidermal growth factor
Umod	30.5191	down	23.1538	down	25.1824	down	4.72466	down	uromodulin
Slc5a2	4.78746	down	5.08225	down	5.033	down	4.68916	down	solute carrier family 5 (sodium/glucose cotransporter), member 2
Mme	4.5039	down	6.00963	down	5.38067	down	4.66956	down	membrane metallo endopeptidase
Slc6a19	4.05874	down	5.13559	down	4.62244	down	4.6318	down	solute carrier family 6 (neurotransmitter transporter), member 19
Mettl7b	4.43784	down	5.27879	down	4.99724	down	4.60121	down	methyltransferase like 7B
Dao1	4.59482	down	5.45469	down	4.91284	down	4.59002	down	D-amino acid oxidase 1
Wfdc15b	15.6291	down	19.0158	down	15.428	down	4.46889	down	WAP four-disulfide core domain 15B
Khk	5.39172	down	4.20431	down	4.53453	down	4.45234	down	ketohexokinase
Lrrc19	4.17139	down	5.34508	down	4.76374	down	4.29923	down	leucine rich repeat containing 19
Cml3	4.32407	down	4.7324	down	4.50251	down	4.23873	down	camello-like 3
Slc22a8	4.45466	down	4.85489	down	4.74748	down	4.19491	down	solute carrier family 22 (organic anion transporter), member 8
Htra1	6.83762	down	6.36575	down	5.41023	down	4.13547	down	HtrA serine peptidase 1
Slc3a1	4.36536	down	5.1256	down	5.40334	down	4.09837	down	solute carrier family 3, member 1
Gsta3	4.87284	down	5.78659	down	4.86945	down	4.07813	down	glutathione S-transferase, alpha 3
Cml3	4.07048	down	4.51882	down	4.27857	down	4.075	down	camello-like 3
