# Supplementary material for: Gene Expression Programs of Mouse Endothelial Cells in Kidney Development and Disease
Source: PLoS One. 2010 Aug 10;5(8):e12034. doi: 10.1371/journal.pone.0012034 (PMC2919381; doi:10.1371/journal.pone.0012034)
Supplement: Supplementary Data S11 — ToppGene functional analysis of genes with changed expression in db/db glomerular endothelial cells compared to wild type. (1.76 MB XLS) [file pone.0012034.s011.xls]

Category	ID	Name	Source	P-value	Hit Count in Query List	Hit Count in Genome	Hit in Query List
GO: Molecular Function	GO:0004115	3',5'-cyclic-AMP phosphodiesterase activity		0.00014	3	9	PDE4D,PDE4B,PDE7B
GO: Molecular Function	GO:0004114	3',5'-cyclic-nucleotide phosphodiesterase activity		0.000185	4	24	PDE4D,PDE6D,PDE4B,PDE7B
GO: Molecular Function	GO:0004112	cyclic-nucleotide phosphodiesterase activity		0.000219	4	25	PDE4D,PDE6D,PDE4B,PDE7B
GO: Molecular Function	GO:0005041	low-density lipoprotein receptor activity		0.000358	3	12	CXCL16,STAB1,CD36
GO: Molecular Function	GO:0030228	lipoprotein receptor activity		0.00088	3	16	CXCL16,STAB1,CD36
GO: Molecular Function	GO:0008034	lipoprotein binding		0.001128	4	38	CXCL16,GPIHBP1,STAB1,CD36
GO: Molecular Function	GO:0016628	oxidoreductase activity, acting on the CH-CH group of donors, NAD or NADP as acceptor		0.001482	3	19	PTGR1,DHCR24,DECR1
GO: Molecular Function	GO:0030169	low-density lipoprotein binding		0.002613	3	23	CXCL16,STAB1,CD36
GO: Molecular Function	GO:0008081	phosphoric diester hydrolase activity		0.003759	5	85	C3AR1,PDE4D,PDE6D,PDE4B,PDE7B
GO: Molecular Function	GO:0008035	high-density lipoprotein binding		0.003917	2	8	GPIHBP1,CD36
GO: Molecular Function	GO:0001848	complement binding		0.004996	2	9	CFB,C3AR1
GO: Molecular Function	GO:0050839	cell adhesion molecule binding		0.006756	3	32	P2RX4,VCAM1,PVR
GO: Molecular Function	GO:0005178	integrin binding		0.007197	4	63	ITGB3,VCAM1,EDIL3,ICAM1
GO: Molecular Function	GO:0015559	multidrug efflux pump activity		0.012147	1	1	ABCC4
GO: Molecular Function	GO:0008116	prostaglandin-I synthase activity		0.012147	1	1	PTGIS
GO: Molecular Function	GO:0003844	1,4-alpha-glucan branching enzyme activity		0.012147	1	1	GBE1
GO: Molecular Function	GO:0016603	glutaminyl-peptide cyclotransferase activity		0.012147	1	1	QPCT
GO: Molecular Function	GO:0031716	calcitonin receptor binding		0.012147	1	1	CALCA
GO: Molecular Function	GO:0043546	molybdopterin cofactor binding		0.012147	1	1	SUOX
GO: Molecular Function	GO:0001850	complement component C3a binding		0.012147	1	1	C3AR1
GO: Molecular Function	GO:0008955	peptidoglycan glycosyltransferase activity		0.012147	1	1	CSGALNACT1
GO: Molecular Function	GO:0008425	2-polyprenyl-6-methoxy-1,4-benzoquinone methyltransferase activity		0.012147	1	1	COQ3
GO: Molecular Function	GO:0010420	polyprenyldihydroxybenzoate methyltransferase activity		0.012147	1	1	COQ3
GO: Molecular Function	GO:0030580	quinone cofactor methyltransferase activity		0.012147	1	1	COQ3
GO: Molecular Function	GO:0004581	dolichyl-phosphate beta-glucosyltransferase activity		0.012147	1	1	ALG5
GO: Molecular Function	GO:0016287	glycerone-phosphate O-acyltransferase activity		0.012147	1	1	GNPAT
GO: Molecular Function	GO:0001567	cholesterol 25-hydroxylase activity		0.012147	1	1	CH25H
GO: Molecular Function	GO:0047933	glucose-1,6-bisphosphate synthase activity		0.012147	1	1	PGM2L1
GO: Molecular Function	GO:0004395	hexaprenyldihydroxybenzoate methyltransferase activity		0.012147	1	1	COQ3
GO: Molecular Function	GO:0008108	UDP-glucose:hexose-1-phosphate uridylyltransferase activity		0.012147	1	1	GALT
GO: Molecular Function	GO:0004876	complement component C3a receptor activity		0.012147	1	1	C3AR1
GO: Molecular Function	GO:0032440	2-alkenal reductase activity		0.012147	1	1	PTGR1
GO: Molecular Function	GO:0004943	C3a anaphylatoxin receptor activity		0.012147	1	1	C3AR1
GO: Molecular Function	GO:0050614	delta24-sterol reductase activity		0.012147	1	1	DHCR24
GO: Molecular Function	GO:0008482	sulfite oxidase activity		0.012147	1	1	SUOX
GO: Molecular Function	GO:0005020	stem cell factor receptor activity		0.012147	1	1	KIT
GO: Molecular Function	GO:0047280	nicotinamide phosphoribosyltransferase activity		0.012147	1	1	NAMPT
GO: Molecular Function	GO:0004906	interferon-gamma receptor activity		0.024148	1	2	IFNGR2
GO: Molecular Function	GO:0070890	sodium-dependent L-ascorbate transmembrane transporter activity		0.024148	1	2	SLC23A2
GO: Molecular Function	GO:0004609	phosphatidylserine decarboxylase activity		0.024148	1	2	GOT1
GO: Molecular Function	GO:0031386	protein tag		0.024148	1	2	RNF41
GO: Molecular Function	GO:0008169	C-methyltransferase activity		0.024148	1	2	COQ3
GO: Molecular Function	GO:0015229	L-ascorbic acid transporter activity		0.024148	1	2	SLC23A2
GO: Molecular Function	GO:0032027	myosin light chain binding		0.024148	1	2	CXCR4
GO: Molecular Function	GO:0046935	1-phosphatidylinositol-3-kinase regulator activity		0.024148	1	2	PIK3R3
GO: Molecular Function	GO:0047237	glucuronylgalactosylproteoglycan 4-beta-N-acetylgalactosaminyltransferase activity		0.024148	1	2	CSGALNACT1
GO: Molecular Function	GO:0004909	interleukin-1, Type I, activating receptor activity		0.024148	1	2	IL1R1
GO: Molecular Function	GO:0016404	15-hydroxyprostaglandin dehydrogenase (NAD+) activity		0.024148	1	2	ABCC4
GO: Molecular Function	GO:0008523	sodium-dependent multivitamin transmembrane transporter activity		0.024148	1	2	SLC23A2
GO: Molecular Function	GO:0008670	2,4-dienoyl-CoA reductase (NADPH) activity		0.024148	1	2	DECR1
GO: Molecular Function	GO:0019964	interferon-gamma binding		0.024148	1	2	IFNGR2
GO: Molecular Function	GO:0045569	TRAIL binding		0.024148	1	2	TNFRSF10B
GO: Molecular Function	GO:0047522	15-oxoprostaglandin 13-oxidase activity		0.024148	1	2	PTGR1
GO: Molecular Function	GO:0019967	interleukin-1, Type I, activating binding		0.024148	1	2	IL1R1
GO: Molecular Function	GO:0008520	L-ascorbate:sodium symporter activity		0.024148	1	2	SLC23A2
GO: Molecular Function	GO:0070492	oligosaccharide binding		0.024148	1	2	SELE
GO: Molecular Function	GO:0016627	oxidoreductase activity, acting on the CH-CH group of donors		0.025239	3	52	PTGR1,DHCR24,DECR1
GO: Molecular Function	GO:0042578	phosphoric ester hydrolase activity		0.025339	9	345	ACP1,HDHD3,C3AR1,PFKFB3,DUSP6,PDE4D,PDE6D,PDE4B,PDE7B
GO: Molecular Function	GO:0051183	vitamin transporter activity		0.026494	2	21	SLC23A2,SLC25A32
GO: Molecular Function	GO:0004069	L-aspartate:2-oxoglutarate aminotransferase activity		0.036003	1	3	GOT1
GO: Molecular Function	GO:0004875	complement receptor activity		0.036003	1	3	C3AR1
GO: Molecular Function	GO:0004942	anaphylatoxin receptor activity		0.036003	1	3	C3AR1
GO: Molecular Function	GO:0030984	kininogen binding		0.036003	1	3	CTSB
GO: Molecular Function	GO:0042806	fucose binding		0.036003	1	3	C10orf125
GO: Molecular Function	GO:0042296	ISG15 ligase activity		0.036003	1	3	UBE2E2
GO: Molecular Function	GO:0019834	phospholipase A2 inhibitor activity		0.036003	1	3	ANXA3
GO: Molecular Function	GO:0033691	sialic acid binding		0.036003	1	3	SELE
GO: Molecular Function	GO:0001618	viral receptor activity		0.036003	1	3	PVR
GO: Molecular Function	GO:0004222	metalloendopeptidase activity		0.039127	4	105	ADAM19,ADAM28,ZMPSTE24,ADAMTS9
GO: Molecular Function	GO:0030246	carbohydrate binding		0.041063	9	377	SMOC2,BGN,SELE,GALNT1,C10orf125,ATRNL1,STAB1,CD34,SERPINE2
GO: Molecular Function	GO:0016757	transferase activity, transferring glycosyl groups		0.044059	7	266	ST8SIA6,PARP8,GALNT1,GBE1,ALG5,NAMPT,CSGALNACT1
GO: Molecular Function	GO:0070402	NADPH binding		0.047715	1	4	DECR1
GO: Molecular Function	GO:0030544	Hsp70 protein binding		0.047715	1	4	CDC2
GO: Molecular Function	GO:0015239	multidrug transporter activity		0.047715	1	4	ABCC4
GO: Molecular Function	GO:0008607	phosphorylase kinase regulator activity		0.047715	1	4	ELP4
GO: Molecular Function	GO:0047238	glucuronosyl-N-acetylgalactosaminyl-proteoglycan 4-beta-N-acetylgalactosaminyltransferase activity		0.047715	1	4	CSGALNACT1
GO: Molecular Function	GO:0008907	integrase activity		0.047715	1	4	PPFIBP1
GO: Molecular Function	GO:0019961	interferon binding		0.047715	1	4	IFNGR2
GO: Molecular Function	GO:0004849	uridine kinase activity		0.047715	1	4	UCK1
GO: Molecular Function	GO:0070053	thrombospondin receptor activity		0.047715	1	4	CD36
GO: Molecular Function	GO:0003873	6-phosphofructo-2-kinase activity		0.047715	1	4	PFKFB3
GO: Molecular Function	GO:0004904	interferon receptor activity		0.047715	1	4	IFNGR2
GO: Molecular Function	GO:0015016	[heparan sulfate]-glucosamine N-sulfotransferase activity		0.047715	1	4	NDST1
GO: Molecular Function	GO:0019955	cytokine binding		0.048976	4	113	IL1R1,IFNGR2,CXCR4,CD36
GO: Biological Process	GO:0007155	cell adhesion		0.00003	26	873	SMOC2,JAM3,TGFB1,ITGB3,SELE,HIF1A,VCAM1,CALCA,PCDHB15,NAT8,PCDHB9,F11R,EDIL3,PPFIBP1,MCAM,STAB1,DCBLD1,CD36,CD34,PLXNC1,LAMC1,FLRT3,BTBD9,ATP2C1,ICAM1,PVR
GO: Biological Process	GO:0022610	biological adhesion		0.000031	26	874	SMOC2,JAM3,TGFB1,ITGB3,SELE,HIF1A,VCAM1,CALCA,PCDHB15,NAT8,PCDHB9,F11R,EDIL3,PPFIBP1,MCAM,STAB1,DCBLD1,CD36,CD34,PLXNC1,LAMC1,FLRT3,BTBD9,ATP2C1,ICAM1,PVR
GO: Biological Process	GO:0007157	heterophilic cell adhesion		0.000239	4	25	SELE,VCAM1,MCAM,ICAM1
GO: Biological Process	GO:0009611	response to wounding		0.000253	19	617	TGFB1,THBD,CD55,CFB,ITGB3,SELE,SERPINE1,BMP6,VPS45,HIF1A,C3AR1,IL1A,CALCA,F11R,STAB1,CXCR4,CD36,CTSB,NDST1
GO: Biological Process	GO:0016477	cell migration		0.000367	15	436	TGFB1,KIT,ITGB3,SELE,CXCL16,HIF1A,VCAM1,CALCA,CXCR4,KATNA1,CD34,LAMC1,SERPINE2,ICAM1,PVR
GO: Biological Process	GO:0007159	leukocyte adhesion		0.000375	4	28	SELE,VCAM1,CALCA,ICAM1
GO: Biological Process	GO:0045123	cellular extravasation		0.000383	3	12	SELE,VCAM1,ICAM1
GO: Biological Process	GO:0030334	regulation of cell migration		0.000422	9	180	TGFB1,KIT,ITGB3,SELE,CXCL16,HIF1A,CXCR4,SERPINE2,ICAM1
GO: Biological Process	GO:0009605	response to external stimulus		0.00043	26	1029	TGFB1,KIT,THBD,CD55,CFB,KLF4,ITGB3,SELE,SERPINE1,BMP6,CXCL16,VPS45,HIF1A,C3AR1,FABP7,IL1A,CALCA,SUOX,F11R,STAB1,PDE6D,CXCR4,CD36,MEST,CTSB,NDST1
GO: Biological Process	GO:0002248	connective tissue replacement during inflammatory response		0.000458	2	3	TGFB1,HIF1A
GO: Biological Process	GO:0006954	inflammatory response		0.000463	14	398	TGFB1,CD55,CFB,SELE,BMP6,VPS45,HIF1A,C3AR1,IL1A,CALCA,F11R,STAB1,CXCR4,NDST1
GO: Biological Process	GO:0008354	germ cell migration		0.000493	3	13	TGFB1,KIT,CXCR4
GO: Biological Process	GO:0022406	membrane docking		0.00056	4	31	EXOC4,VPS45,VCAM1,ICAM1
GO: Biological Process	GO:0060363	cranial suture morphogenesis		0.000908	2	4	TGFB1,INSIG1
GO: Biological Process	GO:0010523	negative regulation of calcium ion transport into cytosol		0.000908	2	4	TGFB1,CALCA
GO: Biological Process	GO:0048870	cell motility		0.001009	15	481	TGFB1,KIT,ITGB3,SELE,CXCL16,HIF1A,VCAM1,CALCA,CXCR4,KATNA1,CD34,LAMC1,SERPINE2,ICAM1,PVR
GO: Biological Process	GO:0051270	regulation of cell motion		0.001035	9	204	TGFB1,KIT,ITGB3,SELE,CXCL16,HIF1A,CXCR4,SERPINE2,ICAM1
GO: Biological Process	GO:0040012	regulation of locomotion		0.001071	9	205	TGFB1,KIT,ITGB3,SELE,CXCL16,HIF1A,CXCR4,SERPINE2,ICAM1
GO: Biological Process	GO:0030335	positive regulation of cell migration		0.001123	6	94	TGFB1,KIT,SELE,CXCL16,HIF1A,ICAM1
GO: Biological Process	GO:0030155	regulation of cell adhesion		0.0013	8	170	SMOC2,TGFB1,HIF1A,CALCA,NAT8,EDIL3,CD36,ICAM1
GO: Biological Process	GO:0032352	positive regulation of hormone metabolic process		0.0015	2	5	BMP6,HIF1A
GO: Biological Process	GO:0002246	healing during inflammatory response		0.0015	2	5	TGFB1,HIF1A
GO: Biological Process	GO:0022614	membrane to membrane docking		0.0015	2	5	VCAM1,ICAM1
GO: Biological Process	GO:0046886	positive regulation of hormone biosynthetic process		0.0015	2	5	BMP6,HIF1A
GO: Biological Process	GO:0051272	positive regulation of cell motion		0.001889	6	104	TGFB1,KIT,SELE,CXCL16,HIF1A,ICAM1
GO: Biological Process	GO:0002376	immune system process		0.00189	27	1200	TGFB1,KIT,CD55,CFB,TNFAIP1,ADD2,ITGB3,SELE,BMP6,CXCL16,HIF1A,C3AR1,MFSD6,VCAM1,PELI1,IL1A,IL1R1,CALCA,HCLS1,TMEM173,CXCR4,CD36,CD34,NFIL3,SFXN1,ICAM1,PVR
GO: Biological Process	GO:0006952	defense response		0.001922	19	731	TGFB1,CD55,CFB,SELE,BMP6,CXCL16,VPS45,HIF1A,C3AR1,PELI1,IL1A,IL1R1,CALCA,F11R,STAB1,TMEM173,CXCR4,NDST1,PVR
GO: Biological Process	GO:0050901	leukocyte tethering or rolling		0.002232	2	6	SELE,VCAM1
GO: Biological Process	GO:0030225	macrophage differentiation		0.002512	4	46	TGFB1,ITGB3,CALCA,CD36
GO: Biological Process	GO:0030099	myeloid cell differentiation		0.002788	8	192	TGFB1,KIT,ITGB3,HIF1A,CALCA,HCLS1,CD36,SFXN1
GO: Biological Process	GO:0045087	innate immune response		0.002879	8	193	TGFB1,CD55,CFB,CXCL16,PELI1,IL1R1,TMEM173,PVR
GO: Biological Process	GO:0042221	response to chemical stimulus		0.002919	30	1426	TGFB1,KIT,THBD,HSPB1,GOT1,CFB,KLF4,PLIN2,PTGR1,SELE,SERPINE1,SEPP1,CXCL16,P2RX4,ABCC4,HIF1A,SLC23A2,DHCR24,C3AR1,EGLN3,PELI1,IL1R1,NAT8,SUOX,HCLS1,PIK3R3,CXCR4,MEST,EIF2B1,PDLIM1
GO: Biological Process	GO:0016337	cell-cell adhesion		0.002948	12	381	TGFB1,SELE,HIF1A,VCAM1,CALCA,PCDHB15,PCDHB9,MCAM,CD34,ATP2C1,ICAM1,PVR
GO: Biological Process	GO:0031274	positive regulation of pseudopodium assembly		0.003099	2	7	KIT,CDC42EP2
GO: Biological Process	GO:0045778	positive regulation of ossification		0.003556	3	25	TGFB1,BMP6,CALCA
GO: Biological Process	GO:0002682	regulation of immune system process		0.003593	13	442	TGFB1,CD55,CFB,ITGB3,SELE,HIF1A,C3AR1,VCAM1,PELI1,CALCA,CD36,ICAM1,PVR
GO: Biological Process	GO:0040011	locomotion		0.00368	16	605	TGFB1,KIT,ITGB3,SELE,CXCL16,HIF1A,C3AR1,VCAM1,CALCA,CXCR4,KATNA1,CD34,LAMC1,SERPINE2,ICAM1,PVR
GO: Biological Process	GO:0050900	leukocyte migration		0.003738	5	83	SELE,CXCL16,VCAM1,CD34,ICAM1
GO: Biological Process	GO:0010575	positive regulation vascular endothelial growth factor production		0.004098	2	8	HIF1A,IL1A
GO: Biological Process	GO:0031269	pseudopodium assembly		0.004098	2	8	KIT,CDC42EP2
GO: Biological Process	GO:0031272	regulation of pseudopodium assembly		0.004098	2	8	KIT,CDC42EP2
GO: Biological Process	GO:0031268	pseudopodium organization		0.004098	2	8	KIT,CDC42EP2
GO: Biological Process	GO:0006631	fatty acid metabolic process		0.004791	9	256	PTGR1,LYPLA2,ACSF2,GNPAT,INSIG1,DECR1,PTGIS,CH25H,MGST2
GO: Biological Process	GO:0010876	lipid localization		0.004903	6	126	PLIN2,ITGB3,GLTP,GPIHBP1,CD36,PLTP
GO: Biological Process	GO:0010742	macrophage derived foam cell differentiation		0.004929	3	28	TGFB1,ITGB3,CD36
GO: Biological Process	GO:0010574	regulation of vascular endothelial growth factor production		0.005226	2	9	HIF1A,IL1A
GO: Biological Process	GO:0010573	vascular endothelial growth factor production		0.005226	2	9	HIF1A,IL1A
GO: Biological Process	GO:0034405	response to fluid shear stress		0.005226	2	9	TGFB1,P2RX4
GO: Biological Process	GO:0046885	regulation of hormone biosynthetic process		0.005226	2	9	BMP6,HIF1A
GO: Biological Process	GO:0010522	regulation of calcium ion transport into cytosol		0.005448	3	29	TGFB1,P2RX4,CALCA
GO: Biological Process	GO:0007204	elevation of cytosolic calcium ion concentration		0.005914	6	131	TGFB1,CD55,P2RX4,C3AR1,CALCA,CXCR4
GO: Biological Process	GO:0007243	protein kinase cascade		0.005962	15	580	TGFB1,KIT,REL,DAPK1,TNFRSF10B,TNFAIP3,PELI1,GADD45B,DUSP6,HCLS1,CXCR4,ZAK,NDST1,ATP2C1,PIGU
GO: Biological Process	GO:0046852	positive regulation of bone remodeling		0.005999	3	30	TGFB1,BMP6,CALCA
GO: Biological Process	GO:0032787	monocarboxylic acid metabolic process		0.006401	11	368	PTGR1,LYPLA2,ACSF2,GNPAT,INSIG1,HIF1A,DECR1,PTGIS,CH25H,MGST2,CSGALNACT1
GO: Biological Process	GO:0002684	positive regulation of immune system process		0.006573	9	269	TGFB1,CD55,CFB,SELE,C3AR1,VCAM1,PELI1,ICAM1,PVR
GO: Biological Process	GO:0051480	cytosolic calcium ion homeostasis		0.007319	6	137	TGFB1,CD55,P2RX4,C3AR1,CALCA,CXCR4
GO: Biological Process	GO:0001819	positive regulation of cytokine production		0.007536	5	98	TGFB1,HIF1A,PELI1,IL1A,CALCA
GO: Biological Process	GO:0045649	regulation of macrophage differentiation		0.007845	3	33	ITGB3,CALCA,CD36
GO: Biological Process	GO:0001667	ameboidal cell migration		0.007855	2	11	TGFB1,CXCR4
GO: Biological Process	GO:0051926	negative regulation of calcium ion transport		0.007855	2	11	TGFB1,CALCA
GO: Biological Process	GO:0051674	localization of cell		0.008314	16	660	TGFB1,KIT,HSPB1,ITGB3,SELE,CXCL16,HIF1A,VCAM1,CALCA,CXCR4,KATNA1,CD34,LAMC1,SERPINE2,ICAM1,PVR
GO: Biological Process	GO:0006928	cell motion		0.008314	16	660	TGFB1,KIT,HSPB1,ITGB3,SELE,CXCL16,HIF1A,VCAM1,CALCA,CXCR4,KATNA1,CD34,LAMC1,SERPINE2,ICAM1,PVR
GO: Biological Process	GO:0044262	cellular carbohydrate metabolic process		0.008446	12	436	ST8SIA6,GOT1,BGN,GALT,HIF1A,GBE1,ALG5,PFKFB3,COQ3,PGM2L1,NDST1,CSGALNACT1
GO: Biological Process	GO:0034105	positive regulation of tissue remodeling		0.008527	3	34	TGFB1,BMP6,CALCA
GO: Biological Process	GO:0002573	myeloid leukocyte differentiation		0.008533	5	101	TGFB1,KIT,ITGB3,CALCA,CD36
GO: Biological Process	GO:0034330	cell junction organization		0.008686	4	65	TGFB1,ITGB3,GNPAT,LAMC1
GO: Biological Process	GO:0032879	regulation of localization		0.0089	16	665	TGFB1,KIT,SNCG,ITGB3,EXOC4,SELE,CXCL16,P2RX4,HIF1A,RAB8B,IL1A,CALCA,CXCR4,CD36,SERPINE2,ICAM1
GO: Biological Process	GO:0010811	positive regulation of cell-substrate adhesion		0.009242	3	35	SMOC2,EDIL3,CD36
GO: Biological Process	GO:0045932	negative regulation of muscle contraction		0.009349	2	12	P2RX4,CALCA
GO: Biological Process	GO:0048070	regulation of pigmentation during development		0.009349	2	12	KIT,ADAMTS9
GO: Biological Process	GO:0045785	positive regulation of cell adhesion		0.010153	4	68	SMOC2,CALCA,EDIL3,CD36
GO: Biological Process	GO:0019915	lipid storage		0.010775	3	37	PLIN2,ITGB3,CD36
GO: Biological Process	GO:0032350	regulation of hormone metabolic process		0.01096	2	13	BMP6,HIF1A
GO: Biological Process	GO:0015012	heparan sulfate proteoglycan biosynthetic process		0.01096	2	13	NDST1,CSGALNACT1
GO: Biological Process	GO:0045765	regulation of angiogenesis		0.011215	4	70	SERPINE1,HIF1A,IL1A,STAB1
GO: Biological Process	GO:0034138	toll-like receptor 3 signaling pathway		0.012433	1	1	PELI1
GO: Biological Process	GO:0055119	relaxation of cardiac muscle		0.012433	1	1	P2RX4
GO: Biological Process	GO:0019691	UDP-glucose conversion		0.012433	1	1	GALT
GO: Biological Process	GO:0031581	hemidesmosome assembly		0.012433	1	1	LAMC1
GO: Biological Process	GO:0032347	regulation of aldosterone biosynthetic process		0.012433	1	1	BMP6
GO: Biological Process	GO:0002430	complement receptor mediated signaling pathway		0.012433	1	1	C3AR1
GO: Biological Process	GO:0032349	positive regulation of aldosterone biosynthetic process		0.012433	1	1	BMP6
GO: Biological Process	GO:0090031	positive regulation of steroid hormone biosynthetic process		0.012433	1	1	BMP6
GO: Biological Process	GO:0034139	regulation of toll-like receptor 3 signaling pathway		0.012433	1	1	PELI1
GO: Biological Process	GO:0019401	alditol biosynthetic process		0.012433	1	1	GOT1
GO: Biological Process	GO:0032346	positive regulation of aldosterone metabolic process		0.012433	1	1	BMP6
GO: Biological Process	GO:0001984	vasodilation of artery involved in baroreceptor response to increased systemic arterial blood pressure		0.012433	1	1	CALCA
GO: Biological Process	GO:0009817	defense response to fungus, incompatible interaction		0.012433	1	1	TGFB1
GO: Biological Process	GO:0055118	negative regulation of cardiac muscle contraction		0.012433	1	1	P2RX4
GO: Biological Process	GO:0051280	negative regulation of release of sequestered calcium ion into cytosol		0.012433	1	1	TGFB1
GO: Biological Process	GO:0034141	positive regulation of toll-like receptor 3 signaling pathway		0.012433	1	1	PELI1
GO: Biological Process	GO:0002457	T cell antigen processing and presentation		0.012433	1	1	ICAM1
GO: Biological Process	GO:0032468	Golgi calcium ion homeostasis		0.012433	1	1	ATP2C1
GO: Biological Process	GO:0002693	positive regulation of cellular extravasation		0.012433	1	1	ICAM1
GO: Biological Process	GO:0032472	Golgi calcium ion transport		0.012433	1	1	ATP2C1
GO: Biological Process	GO:0034612	response to tumor necrosis factor		0.012682	2	14	SELE,CXCL16
GO: Biological Process	GO:0043122	regulation of I-kappaB kinase/NF-kappaB cascade		0.012966	5	112	REL,TNFRSF10B,TNFAIP3,PELI1,ATP2C1
GO: Biological Process	GO:0000271	polysaccharide biosynthetic process		0.013335	3	40	GBE1,NDST1,CSGALNACT1
GO: Biological Process	GO:0010627	regulation of protein kinase cascade		0.014863	8	256	TGFB1,REL,TNFRSF10B,TNFAIP3,PELI1,HCLS1,ATP2C1,PIGU
GO: Biological Process	GO:0030005	cellular di-, tri-valent inorganic cation homeostasis		0.014863	8	256	TGFB1,CD55,P2RX4,HIF1A,C3AR1,CALCA,CXCR4,ATP2C1
GO: Biological Process	GO:0006874	cellular calcium ion homeostasis		0.015355	7	208	TGFB1,CD55,P2RX4,C3AR1,CALCA,CXCR4,ATP2C1
GO: Biological Process	GO:0030279	negative regulation of ossification		0.016454	2	16	TGFB1,CALCA
GO: Biological Process	GO:0006873	cellular ion homeostasis		0.017131	11	424	TGFB1,CD55,GNPAT,P2RY2,P2RX4,HIF1A,C3AR1,CALCA,CXCR4,ATP2C1,GRIK3
GO: Biological Process	GO:0060402	calcium ion transport into cytosol		0.017243	3	44	TGFB1,P2RX4,CALCA
GO: Biological Process	GO:0055074	calcium ion homeostasis		0.017272	7	213	TGFB1,CD55,P2RX4,C3AR1,CALCA,CXCR4,ATP2C1
GO: Biological Process	GO:0001525	angiogenesis		0.017675	7	214	SERPINE1,HIF1A,SOX17,IL1A,ANPEP,STAB1,CXCR4
GO: Biological Process	GO:0006869	lipid transport		0.018111	6	167	PLIN2,ITGB3,GLTP,GPIHBP1,CD36,PLTP
GO: Biological Process	GO:0006979	response to oxidative stress		0.018111	6	167	SERPINE1,SEPP1,HIF1A,SLC23A2,DHCR24,PDLIM1
GO: Biological Process	GO:0060401	cytosolic calcium ion transport		0.018309	3	45	TGFB1,P2RX4,CALCA
GO: Biological Process	GO:0030201	heparan sulfate proteoglycan metabolic process		0.018497	2	17	NDST1,CSGALNACT1
GO: Biological Process	GO:0045651	positive regulation of macrophage differentiation		0.018497	2	17	CALCA,CD36
GO: Biological Process	GO:0070555	response to interleukin-1		0.018497	2	17	SELE,IL1R1
GO: Biological Process	GO:0042592	homeostatic process		0.018958	19	912	TGFB1,KIT,CD55,PDIA5,GOT1,KLF4,SERPINE1,GNPAT,P2RY2,P2RX4,HIF1A,C3AR1,IL1A,CALCA,HCLS1,CXCR4,SFXN1,ATP2C1,GRIK3
GO: Biological Process	GO:0009967	positive regulation of signal transduction		0.019141	9	321	TGFB1,KIT,REL,TNFRSF10B,P2RX4,HIF1A,PELI1,HCLS1,ATP2C1
GO: Biological Process	GO:0055082	cellular chemical homeostasis		0.019383	11	432	TGFB1,CD55,GNPAT,P2RY2,P2RX4,HIF1A,C3AR1,CALCA,CXCR4,ATP2C1,GRIK3
GO: Biological Process	GO:0055066	di-, tri-valent inorganic cation homeostasis		0.019417	8	269	TGFB1,CD55,P2RX4,HIF1A,C3AR1,CALCA,CXCR4,ATP2C1
GO: Biological Process	GO:0016126	sterol biosynthetic process		0.020549	3	47	INSIG1,DHCR24,CH25H
GO: Biological Process	GO:0045639	positive regulation of myeloid cell differentiation		0.020549	3	47	HIF1A,CALCA,CD36
GO: Biological Process	GO:0043271	negative regulation of ion transport		0.020641	2	18	TGFB1,CALCA
GO: Biological Process	GO:0030501	positive regulation of bone mineralization		0.020641	2	18	TGFB1,BMP6
GO: Biological Process	GO:0030204	chondroitin sulfate metabolic process		0.020641	2	18	BGN,CSGALNACT1
GO: Biological Process	GO:0012501	programmed cell death		0.021887	23	1185	TGFB1,KIT,DRAM1,DAPK1,HSPB1,TNFRSF10B,TNFAIP3,BCAP29,P2RX4,HIF1A,DHCR24,EGLN3,GADD45B,IL1A,TMEM173,CASP4,CXCR4,ZAK,CD36,CTSB,TP53INP1,CDC2,PVR
GO: Biological Process	GO:0006875	cellular metal ion homeostasis		0.022074	7	224	TGFB1,CD55,P2RX4,C3AR1,CALCA,CXCR4,ATP2C1
GO: Biological Process	GO:0030097	hemopoiesis		0.022354	10	385	TGFB1,KIT,ADD2,ITGB3,HIF1A,VCAM1,CALCA,HCLS1,CD36,SFXN1
GO: Biological Process	GO:0006629	lipid metabolic process		0.022481	19	929	ST8SIA6,KIT,DHRS3,PLIN2,PTGR1,ITGB3,BMP6,LYPLA2,ACSF2,GNPAT,INSIG1,DHCR24,DECR1,PTGIS,CH25H,CD36,MGST2,PLTP,PIGU
GO: Biological Process	GO:0002687	positive regulation of leukocyte migration		0.022884	2	19	SELE,ICAM1
GO: Biological Process	GO:0070169	positive regulation of biomineral formation		0.022884	2	19	TGFB1,BMP6
GO: Biological Process	GO:0006516	glycoprotein catabolic process		0.022884	2	19	DHCR24,ADAMTS9
GO: Biological Process	GO:0009260	ribonucleotide biosynthetic process		0.023185	5	130	TGFB1,ADAL,PRPS2,ATP13A3,ATP2C1
GO: Biological Process	GO:0001944	vasculature development		0.023203	9	332	BGN,SERPINE1,HIF1A,SOX17,IL1A,CALCA,ANPEP,STAB1,CXCR4
GO: Biological Process	GO:0048878	chemical homeostasis		0.024083	13	564	TGFB1,CD55,GOT1,SERPINE1,GNPAT,P2RY2,P2RX4,HIF1A,C3AR1,CALCA,CXCR4,ATP2C1,GRIK3
GO: Biological Process	GO:0006029	proteoglycan metabolic process		0.024179	3	50	BGN,NDST1,CSGALNACT1
GO: Biological Process	GO:0034329	cell junction assembly		0.024179	3	50	ITGB3,GNPAT,LAMC1
GO: Biological Process	GO:0048514	blood vessel morphogenesis		0.024437	8	281	BGN,SERPINE1,HIF1A,SOX17,IL1A,ANPEP,STAB1,CXCR4
GO: Biological Process	GO:0051241	negative regulation of multicellular organismal process		0.024503	6	179	TGFB1,THBD,SERPINE1,P2RX4,CALCA,GRIK3
GO: Biological Process	GO:0046485	ether lipid metabolic process		0.024711	1	2	GNPAT
GO: Biological Process	GO:0001887	selenium metabolic process		0.024711	1	2	SEPP1
GO: Biological Process	GO:0030210	heparin biosynthetic process		0.024711	1	2	CSGALNACT1
GO: Biological Process	GO:0034123	positive regulation of toll-like receptor signaling pathway		0.024711	1	2	PELI1
GO: Biological Process	GO:0009227	nucleotide-sugar catabolic process		0.024711	1	2	GALT
GO: Biological Process	GO:0048298	positive regulation of isotype switching to IgA isotypes		0.024711	1	2	TGFB1
GO: Biological Process	GO:0070904	transepithelial L-ascorbic acid transport		0.024711	1	2	SLC23A2
GO: Biological Process	GO:0006532	aspartate biosynthetic process		0.024711	1	2	GOT1
GO: Biological Process	GO:0044413	avoidance of host defenses		0.024711	1	2	TGFB1
GO: Biological Process	GO:0010762	regulation of fibroblast migration		0.024711	1	2	TGFB1
GO: Biological Process	GO:0015882	L-ascorbic acid transport		0.024711	1	2	SLC23A2
GO: Biological Process	GO:0048290	isotype switching to IgA isotypes		0.024711	1	2	TGFB1
GO: Biological Process	GO:0055089	fatty acid homeostasis		0.024711	1	2	GOT1
GO: Biological Process	GO:0048296	regulation of isotype switching to IgA isotypes		0.024711	1	2	TGFB1
GO: Biological Process	GO:0030913	paranodal junction assembly		0.024711	1	2	GNPAT
GO: Biological Process	GO:0044415	evasion or tolerance of host defenses		0.024711	1	2	TGFB1
GO: Biological Process	GO:0022617	extracellular matrix disassembly		0.024711	1	2	LAMC1
GO: Biological Process	GO:0006113	fermentation		0.024711	1	2	GOT1
GO: Biological Process	GO:0019049	evasion of host defenses by virus		0.024711	1	2	TGFB1
GO: Biological Process	GO:0009814	defense response, incompatible interaction		0.024711	1	2	TGFB1
GO: Biological Process	GO:0051832	avoidance of defenses of other organism during symbiotic interaction		0.024711	1	2	TGFB1
GO: Biological Process	GO:0019550	glutamate catabolic process to aspartate		0.024711	1	2	GOT1
GO: Biological Process	GO:0002691	regulation of cellular extravasation		0.024711	1	2	ICAM1
GO: Biological Process	GO:0032740	positive regulation of interleukin-17 production		0.024711	1	2	TGFB1
GO: Biological Process	GO:0051834	evasion or tolerance of defenses of other organism during symbiotic interaction		0.024711	1	2	TGFB1
GO: Biological Process	GO:0060370	susceptibility to T cell mediated cytotoxicity		0.024711	1	2	PVR
GO: Biological Process	GO:0043932	ossification involved in bone remodeling		0.024711	1	2	TGFB1
GO: Biological Process	GO:0008611	ether lipid biosynthetic process		0.024711	1	2	GNPAT
GO: Biological Process	GO:0050653	chondroitin sulfate proteoglycan biosynthetic process, polysaccharide chain biosynthetic process		0.024711	1	2	CSGALNACT1
GO: Biological Process	GO:0042118	endothelial cell activation		0.024711	1	2	P2RX4
GO: Biological Process	GO:0019551	glutamate catabolic process to 2-oxoglutarate		0.024711	1	2	GOT1
GO: Biological Process	GO:0032344	regulation of aldosterone metabolic process		0.024711	1	2	BMP6
GO: Biological Process	GO:0001300	chronological cell aging		0.024711	1	2	SERPINE1
GO: Biological Process	GO:0034145	positive regulation of toll-like receptor 4 signaling pathway		0.024711	1	2	PELI1
GO: Biological Process	GO:0006114	glycerol biosynthetic process		0.024711	1	2	GOT1
GO: Biological Process	GO:0032660	regulation of interleukin-17 production		0.024711	1	2	TGFB1
GO: Biological Process	GO:0060364	frontal suture morphogenesis		0.024711	1	2	TGFB1
GO: Biological Process	GO:0034143	regulation of toll-like receptor 4 signaling pathway		0.024711	1	2	PELI1
GO: Biological Process	GO:0032620	interleukin-17 production		0.024711	1	2	TGFB1
GO: Biological Process	GO:0002291	T cell activation via T cell receptor contact with antigen bound to MHC molecule on antigen presenting cell		0.024711	1	2	ICAM1
GO: Biological Process	GO:0010763	positive regulation of fibroblast migration		0.024711	1	2	TGFB1
GO: Biological Process	GO:0015993	molecular hydrogen transport		0.024711	1	2	SLC23A2
GO: Biological Process	GO:0009225	nucleotide-sugar metabolic process		0.025221	2	20	GALT,CSGALNACT1
GO: Biological Process	GO:0060491	regulation of cell projection assembly		0.025221	2	20	KIT,CDC42EP2
GO: Biological Process	GO:0001666	response to hypoxia		0.02528	5	133	TGFB1,HIF1A,EGLN3,CXCR4,PDLIM1
GO: Biological Process	GO:0055065	metal ion homeostasis		0.026636	7	233	TGFB1,CD55,P2RX4,C3AR1,CALCA,CXCR4,ATP2C1
GO: Biological Process	GO:0050654	chondroitin sulfate proteoglycan metabolic process		0.027652	2	21	BGN,CSGALNACT1
GO: Biological Process	GO:0010883	regulation of lipid storage		0.027652	2	21	ITGB3,CD36
GO: Biological Process	GO:0032845	negative regulation of homeostatic process		0.027652	2	21	TGFB1,CALCA
GO: Biological Process	GO:0019400	alditol metabolic process		0.027652	2	21	GOT1,COQ3
GO: Biological Process	GO:0000075	cell cycle checkpoint		0.027738	4	92	MAD2L2,TGFB1,ZAK,CDC2
GO: Biological Process	GO:0010810	regulation of cell-substrate adhesion		0.028133	3	53	SMOC2,EDIL3,CD36
GO: Biological Process	GO:0006690	icosanoid metabolic process		0.028133	3	53	PTGR1,PTGIS,MGST2
GO: Biological Process	GO:0030003	cellular cation homeostasis		0.028756	8	290	TGFB1,CD55,P2RX4,HIF1A,C3AR1,CALCA,CXCR4,ATP2C1
GO: Biological Process	GO:0045860	positive regulation of protein kinase activity		0.02943	7	238	TGFB1,KIT,TNFRSF10B,GADD45B,CALCA,CXCR4,ZAK
GO: Biological Process	GO:0010740	positive regulation of protein kinase cascade		0.029513	6	187	TGFB1,REL,TNFRSF10B,PELI1,HCLS1,ATP2C1
GO: Biological Process	GO:0043112	receptor metabolic process		0.029523	3	54	TGFB1,ITGB3,SELE
GO: Biological Process	GO:0019725	cellular homeostasis		0.029746	12	521	TGFB1,CD55,PDIA5,GNPAT,P2RY2,P2RX4,HIF1A,C3AR1,CALCA,CXCR4,ATP2C1,GRIK3
GO: Biological Process	GO:0050801	ion homeostasis		0.029809	11	462	TGFB1,CD55,GNPAT,P2RY2,P2RX4,HIF1A,C3AR1,CALCA,CXCR4,ATP2C1,GRIK3
GO: Biological Process	GO:0070482	response to oxygen levels		0.03063	5	140	TGFB1,HIF1A,EGLN3,CXCR4,PDLIM1
GO: Biological Process	GO:0016051	carbohydrate biosynthetic process		0.03063	5	140	ST8SIA6,GOT1,GBE1,NDST1,CSGALNACT1
GO: Biological Process	GO:0045637	regulation of myeloid cell differentiation		0.030721	4	95	ITGB3,HIF1A,CALCA,CD36
GO: Biological Process	GO:0005975	carbohydrate metabolic process		0.032252	13	588	ST8SIA6,GOT1,BGN,GALT,GALNT1,HIF1A,GBE1,ALG5,PFKFB3,COQ3,PGM2L1,NDST1,CSGALNACT1
GO: Biological Process	GO:0007093	mitotic cell cycle checkpoint		0.032409	3	56	MAD2L2,TGFB1,CDC2
GO: Biological Process	GO:0046851	negative regulation of bone remodeling		0.03278	2	23	TGFB1,CALCA
GO: Biological Process	GO:0001702	gastrulation with mouth forming second		0.03278	2	23	RNF2,NAT8
GO: Biological Process	GO:0048534	hemopoietic or lymphoid organ development		0.032974	10	411	TGFB1,KIT,ADD2,ITGB3,HIF1A,VCAM1,CALCA,HCLS1,CD36,SFXN1
GO: Biological Process	GO:0010647	positive regulation of cell communication		0.033117	9	354	TGFB1,KIT,REL,TNFRSF10B,P2RX4,HIF1A,PELI1,HCLS1,ATP2C1
GO: Biological Process	GO:0051093	negative regulation of developmental process		0.033179	14	652	TGFB1,KIT,DAPK1,HSPB1,TNFAIP3,KLF4,ITGB3,INSIG1,DHCR24,IL1A,CALCA,STAB1,CASP4,CDC2
GO: Biological Process	GO:0009100	glycoprotein metabolic process		0.033683	6	193	ST8SIA6,GALNT1,HIF1A,DHCR24,ADAMTS9,ALG5
GO: Biological Process	GO:0033674	positive regulation of kinase activity		0.034303	7	246	TGFB1,KIT,TNFRSF10B,GADD45B,CALCA,CXCR4,ZAK
GO: Biological Process	GO:0006915	apoptosis		0.034505	22	1173	TGFB1,DRAM1,DAPK1,HSPB1,TNFRSF10B,TNFAIP3,BCAP29,P2RX4,HIF1A,DHCR24,EGLN3,GADD45B,IL1A,TMEM173,CASP4,CXCR4,ZAK,CD36,CTSB,TP53INP1,CDC2,PVR
GO: Biological Process	GO:0009156	ribonucleoside monophosphate biosynthetic process		0.035473	2	24	ADAL,PRPS2
GO: Biological Process	GO:0006904	vesicle docking during exocytosis		0.035473	2	24	EXOC4,VPS45
GO: Biological Process	GO:0002685	regulation of leukocyte migration		0.035473	2	24	SELE,ICAM1
GO: Biological Process	GO:0019059	initiation of viral infection		0.035473	2	24	CXCR4,ICAM1
GO: Biological Process	GO:0043123	positive regulation of I-kappaB kinase/NF-kappaB cascade		0.036099	4	100	REL,TNFRSF10B,PELI1,ATP2C1
GO: Biological Process	GO:0044419	interspecies interaction between organisms		0.03648	8	304	TGFB1,ITGB3,VCAM1,ANPEP,F11R,CXCR4,ICAM1,PVR
GO: Biological Process	GO:0048583	regulation of response to stimulus		0.036782	11	478	TGFB1,CD55,CFB,SELE,SERPINE1,C3AR1,FABP7,PELI1,CALCA,ICAM1,PVR
GO: Biological Process	GO:0051825	adhesion to other organism during symbiotic interaction		0.036838	1	3	ICAM1
GO: Biological Process	GO:0018243	protein amino acid O-linked glycosylation via threonine		0.036838	1	3	GALNT1
GO: Biological Process	GO:0035066	positive regulation of histone acetylation		0.036838	1	3	TGFB1
GO: Biological Process	GO:0030967	ER-nuclear sterol response pathway		0.036838	1	3	INSIG1
GO: Biological Process	GO:0008218	bioluminescence		0.036838	1	3	HMCN1
GO: Biological Process	GO:0001983	baroreceptor response to increased systemic arterial blood pressure		0.036838	1	3	CALCA
GO: Biological Process	GO:0050765	negative regulation of phagocytosis		0.036838	1	3	TGFB1
GO: Biological Process	GO:0030202	heparin metabolic process		0.036838	1	3	CSGALNACT1
GO: Biological Process	GO:0002513	tolerance induction to self antigen		0.036838	1	3	TGFB1
GO: Biological Process	GO:0090030	regulation of steroid hormone biosynthetic process		0.036838	1	3	BMP6
GO: Biological Process	GO:0018242	protein amino acid O-linked glycosylation via serine		0.036838	1	3	GALNT1
GO: Biological Process	GO:0042789	mRNA transcription from RNA polymerase II promoter		0.036838	1	3	HIF1A
GO: Biological Process	GO:0046813	virion attachment, binding of host cell surface receptor		0.036838	1	3	ICAM1
GO: Biological Process	GO:0032342	aldosterone biosynthetic process		0.036838	1	3	BMP6
GO: Biological Process	GO:0006106	fumarate metabolic process		0.036838	1	3	GOT1
GO: Biological Process	GO:0048702	embryonic neurocranium morphogenesis		0.036838	1	3	NDST1
GO: Biological Process	GO:0002092	positive regulation of receptor internalization		0.036838	1	3	SELE
GO: Biological Process	GO:0006705	mineralocorticoid biosynthetic process		0.036838	1	3	BMP6
GO: Biological Process	GO:0045715	negative regulation of low-density lipoprotein receptor biosynthetic process		0.036838	1	3	ITGB3
GO: Biological Process	GO:0031065	positive regulation of histone deacetylation		0.036838	1	3	TGFB1
GO: Biological Process	GO:0030327	prenylated protein catabolic process		0.036838	1	3	ZMPSTE24
GO: Biological Process	GO:0006855	multidrug transport		0.036838	1	3	ABCC4
GO: Biological Process	GO:0002090	regulation of receptor internalization		0.036838	1	3	SELE
GO: Biological Process	GO:0010614	negative regulation of cardiac muscle hypertrophy		0.036838	1	3	P2RX4
GO: Biological Process	GO:0051856	adhesion to symbiont		0.036838	1	3	ICAM1
GO: Biological Process	GO:0048170	positive regulation of long-term neuronal synaptic plasticity		0.036838	1	3	KIT
GO: Biological Process	GO:0090077	foam cell differentiation		0.036838	1	3	TGFB1
GO: Biological Process	GO:0032757	positive regulation of interleukin-8 production		0.036838	1	3	CALCA
GO: Biological Process	GO:0010800	positive regulation of peptidyl-threonine phosphorylation		0.036838	1	3	TGFB1
GO: Biological Process	GO:0045597	positive regulation of cell differentiation		0.03693	7	250	TGFB1,KIT,BMP6,HIF1A,ADAMTS9,CALCA,CD36
GO: Biological Process	GO:0031589	cell-substrate adhesion		0.037557	5	148	SMOC2,ITGB3,EDIL3,CD36,LAMC1
GO: Biological Process	GO:0045859	regulation of protein kinase activity		0.037912	9	363	TGFB1,KIT,TNFRSF10B,CKS1B,GADD45B,CALCA,DUSP6,CXCR4,ZAK
GO: Biological Process	GO:0034104	negative regulation of tissue remodeling		0.038248	2	25	TGFB1,CALCA
GO: Biological Process	GO:0010743	regulation of macrophage derived foam cell differentiation		0.038248	2	25	ITGB3,CD36
GO: Biological Process	GO:0006071	glycerol metabolic process		0.038248	2	25	GOT1,COQ3
GO: Biological Process	GO:0048771	tissue remodeling		0.038485	5	149	TGFB1,BGN,BMP6,HIF1A,CALCA
GO: Biological Process	GO:0009408	response to heat		0.038607	3	60	HSPB1,CALCA,EIF2B1
GO: Biological Process	GO:0018209	peptidyl-serine modification		0.038607	3	60	TGFB1,BGN,GALNT1
GO: Biological Process	GO:0050776	regulation of immune response		0.038985	7	253	TGFB1,CD55,CFB,C3AR1,PELI1,ICAM1,PVR
GO: Biological Process	GO:0043062	extracellular structure organization		0.039011	6	200	SMOC2,GNPAT,CALCA,PCDHB9,LAMC1,CSGALNACT1
GO: Biological Process	GO:0007584	response to nutrient		0.039427	5	150	TGFB1,CFB,KLF4,SUOX,MEST
GO: Biological Process	GO:0051347	positive regulation of transferase activity		0.039686	7	254	TGFB1,KIT,TNFRSF10B,GADD45B,CALCA,CXCR4,ZAK
GO: Biological Process	GO:0001817	regulation of cytokine production		0.039813	6	201	TGFB1,REL,HIF1A,PELI1,IL1A,CALCA
GO: Biological Process	GO:0051924	regulation of calcium ion transport		0.040244	3	61	TGFB1,P2RX4,CALCA
GO: Biological Process	GO:0048278	vesicle docking		0.041104	2	26	EXOC4,VPS45
GO: Biological Process	GO:0001837	epithelial to mesenchymal transition		0.041104	2	26	TGFB1,HIF1A
GO: Biological Process	GO:0006691	leukotriene metabolic process		0.041104	2	26	PTGR1,MGST2
GO: Biological Process	GO:0060232	delamination		0.041104	2	26	TGFB1,HIF1A
GO: Biological Process	GO:0006955	immune response		0.04293	16	804	TGFB1,CD55,CFB,TNFAIP1,BMP6,CXCL16,C3AR1,MFSD6,PELI1,IL1A,IL1R1,TMEM173,CXCR4,NFIL3,ICAM1,PVR
GO: Biological Process	GO:0051094	positive regulation of developmental process		0.043023	15	740	TGFB1,KIT,CDC42EP2,DAPK1,TNFRSF10B,BMP6,HIF1A,ADAMTS9,IL1A,CALCA,CASP4,ZAK,CD36,TP53INP1,PVR
GO: Biological Process	GO:0018210	peptidyl-threonine modification		0.044037	2	27	TGFB1,GALNT1
GO: Biological Process	GO:0006493	protein amino acid O-linked glycosylation		0.044037	2	27	ST8SIA6,GALNT1
GO: Biological Process	GO:0019827	stem cell maintenance		0.044037	2	27	KIT,KLF4
GO: Biological Process	GO:0009161	ribonucleoside monophosphate metabolic process		0.044037	2	27	ADAL,PRPS2
GO: Biological Process	GO:0000186	activation of MAPKK activity		0.044037	2	27	GADD45B,ZAK
GO: Biological Process	GO:0045429	positive regulation of nitric oxide biosynthetic process		0.044037	2	27	P2RX4,ICAM1
GO: Biological Process	GO:0043405	regulation of MAP kinase activity		0.044347	5	155	TGFB1,KIT,DUSP6,CXCR4,ZAK
GO: Biological Process	GO:0002520	immune system development		0.044971	10	434	TGFB1,KIT,ADD2,ITGB3,HIF1A,VCAM1,CALCA,HCLS1,CD36,SFXN1
GO: Biological Process	GO:0043549	regulation of kinase activity		0.045017	9	375	TGFB1,KIT,TNFRSF10B,CKS1B,GADD45B,CALCA,DUSP6,CXCR4,ZAK
GO: Biological Process	GO:0019228	regulation of action potential in neuron		0.045363	3	64	TGFB1,GNPAT,P2RX4
GO: Biological Process	GO:0009259	ribonucleotide metabolic process		0.045373	5	156	TGFB1,ADAL,PRPS2,ATP13A3,ATP2C1
GO: Biological Process	GO:0006633	fatty acid biosynthetic process		0.045766	4	108	INSIG1,PTGIS,CH25H,MGST2
GO: Biological Process	GO:0007050	cell cycle arrest		0.045766	4	108	TGFB1,DHCR24,ZAK,TP53INP1
GO: Biological Process	GO:0045766	positive regulation of angiogenesis		0.047045	2	28	HIF1A,IL1A
GO: Biological Process	GO:0048864	stem cell development		0.047045	2	28	KIT,KLF4
GO: Biological Process	GO:0002762	negative regulation of myeloid leukocyte differentiation		0.047045	2	28	ITGB3,CALCA
GO: Biological Process	GO:0060349	bone morphogenesis		0.047045	2	28	TGFB1,INSIG1
GO: Biological Process	GO:0051180	vitamin transport		0.047045	2	28	SLC23A2,SLC25A32
GO: Biological Process	GO:0015909	long-chain fatty acid transport		0.047045	2	28	PLIN2,CD36
GO: Biological Process	GO:0043449	cellular alkene metabolic process		0.047045	2	28	PTGR1,MGST2
GO: Biological Process	GO:0002761	regulation of myeloid leukocyte differentiation		0.047138	3	65	ITGB3,CALCA,CD36
GO: Biological Process	GO:0008283	cell proliferation		0.047781	22	1215	TGFB1,KIT,CFB,KLF4,SERPINE1,INSIG1,CKS1B,HIF1A,DHCR24,FABP7,VCAM1,EGLN3,IL1A,CRIP1,CALCA,HCLS1,CXCR4,ZAK,LAMC1,NAMPT,EMP3,CSGALNACT1
GO: Biological Process	GO:0008219	cell death		0.048093	23	1284	TGFB1,KIT,DRAM1,DAPK1,HSPB1,TNFRSF10B,TNFAIP3,BCAP29,P2RX4,HIF1A,DHCR24,EGLN3,GADD45B,IL1A,TMEM173,CASP4,CXCR4,ZAK,CD36,CTSB,TP53INP1,CDC2,PVR
GO: Biological Process	GO:0002523	leukocyte migration during inflammatory response		0.048815	1	4	SELE
GO: Biological Process	GO:0032341	aldosterone metabolic process		0.048815	1	4	BMP6
GO: Biological Process	GO:0006991	response to sterol depletion		0.048815	1	4	INSIG1
GO: Biological Process	GO:0006003	fructose 2,6-bisphosphate metabolic process		0.048815	1	4	PFKFB3
GO: Biological Process	GO:0045714	regulation of low-density lipoprotein receptor biosynthetic process		0.048815	1	4	ITGB3
GO: Biological Process	GO:0007500	mesodermal cell fate determination		0.048815	1	4	KLF4
GO: Biological Process	GO:0008212	mineralocorticoid metabolic process		0.048815	1	4	BMP6
GO: Biological Process	GO:0010799	regulation of peptidyl-threonine phosphorylation		0.048815	1	4	TGFB1
GO: Biological Process	GO:0010616	negative regulation of cardiac muscle adaptation		0.048815	1	4	P2RX4
GO: Biological Process	GO:0002318	myeloid progenitor cell differentiation		0.048815	1	4	KIT
GO: Biological Process	GO:0035306	positive regulation of dephosphorylation		0.048815	1	4	TGFB1
GO: Biological Process	GO:0043619	regulation of transcription from RNA polymerase II promoter in response to oxidative stress		0.048815	1	4	HIF1A
GO: Biological Process	GO:0032306	regulation of prostaglandin secretion		0.048815	1	4	P2RX4
GO: Biological Process	GO:0051541	elastin metabolic process		0.048815	1	4	HIF1A
GO: Biological Process	GO:0031648	protein destabilization		0.048815	1	4	SOX17
GO: Biological Process	GO:0050965	detection of temperature stimulus involved in sensory perception of pain		0.048815	1	4	CALCA
GO: Biological Process	GO:0032310	prostaglandin secretion		0.048815	1	4	P2RX4
GO: Biological Process	GO:0032650	regulation of interleukin-1 alpha production		0.048815	1	4	CALCA
GO: Biological Process	GO:0032610	interleukin-1 alpha production		0.048815	1	4	CALCA
GO: Biological Process	GO:0006533	aspartate catabolic process		0.048815	1	4	GOT1
GO: Biological Process	GO:0019276	UDP-N-acetylgalactosamine metabolic process		0.048815	1	4	CSGALNACT1
GO: Biological Process	GO:0034616	response to laminar fluid shear stress		0.048815	1	4	TGFB1
GO: Biological Process	GO:0014741	negative regulation of muscle hypertrophy		0.048815	1	4	P2RX4
GO: Biological Process	GO:0032305	positive regulation of icosanoid secretion		0.048815	1	4	P2RX4
GO: Biological Process	GO:0034121	regulation of toll-like receptor signaling pathway		0.048815	1	4	PELI1
GO: Biological Process	GO:0046398	UDP-glucuronate metabolic process		0.048815	1	4	CSGALNACT1
GO: Biological Process	GO:0006011	UDP-glucose metabolic process		0.048815	1	4	GALT
GO: Biological Process	GO:0015014	heparan sulfate proteoglycan biosynthetic process, polysaccharide chain biosynthetic process		0.048815	1	4	CSGALNACT1
GO: Biological Process	GO:0006531	aspartate metabolic process		0.048815	1	4	GOT1
GO: Biological Process	GO:0045988	negative regulation of striated muscle contraction		0.048815	1	4	P2RX4
GO: Biological Process	GO:0019852	L-ascorbic acid metabolic process		0.048815	1	4	SLC23A2
GO: Biological Process	GO:0035307	positive regulation of protein amino acid dephosphorylation		0.048815	1	4	TGFB1
GO: Biological Process	GO:0042271	susceptibility to natural killer cell mediated cytotoxicity		0.048815	1	4	PVR
GO: Biological Process	GO:0045636	positive regulation of melanocyte differentiation		0.048815	1	4	ADAMTS9
GO: Biological Process	GO:0006198	cAMP catabolic process		0.048815	1	4	PDE4D
GO: Biological Process	GO:0070723	response to cholesterol		0.048815	1	4	TGFB1
GO: Biological Process	GO:0050942	positive regulation of pigment cell differentiation		0.048815	1	4	ADAMTS9
GO: Biological Process	GO:0032906	transforming growth factor-beta2 production		0.048815	1	4	HIF1A
GO: Biological Process	GO:0031167	rRNA methylation		0.048815	1	4	FTSJ3
GO: Biological Process	GO:0032308	positive regulation of prostaglandin secretion		0.048815	1	4	P2RX4
GO: Biological Process	GO:0035234	germ cell programmed cell death		0.048815	1	4	KIT
GO: Biological Process	GO:0031063	regulation of histone deacetylation		0.048815	1	4	TGFB1
GO: Biological Process	GO:0032730	positive regulation of interleukin-1 alpha production		0.048815	1	4	CALCA
GO: Biological Process	GO:0050961	detection of temperature stimulus involved in sensory perception		0.048815	1	4	CALCA
GO: Biological Process	GO:0031536	positive regulation of exit from mitosis		0.048815	1	4	TGFB1
GO: Biological Process	GO:0032303	regulation of icosanoid secretion		0.048815	1	4	P2RX4
GO: Biological Process	GO:0070498	interleukin-1-mediated signaling pathway		0.048815	1	4	IL1R1
GO: Biological Process	GO:0032909	regulation of transforming growth factor-beta2 production		0.048815	1	4	HIF1A
GO: Biological Process	GO:0008610	lipid biosynthetic process		0.04955	9	382	ST8SIA6,BMP6,GNPAT,INSIG1,DHCR24,PTGIS,CH25H,MGST2,PIGU
GO: Biological Process	GO:0009607	response to biotic stimulus		0.049762	10	442	TGFB1,THBD,HSPB1,CFB,SELE,PELI1,IFNGR2,STAB1,CXCR4,PVR
GO: Cellular Component	GO:0005625	soluble fraction		0.000001	16	330	MERTK,HSPB1,CD55,ACP1,GOT1,GALT,SERPINE1,RAB8B,ANPEP,DUSP6,PDE4D,PDE4B,STMN2,CTSB,CSGALNACT1,EIF2B1
GO: Cellular Component	GO:0009986	cell surface		0.000098	14	370	JAM3,TGFB1,KIT,HSPB1,CD55,BGN,ITGB3,VCAM1,GPIHBP1,CD36,CD34,CTSB,ICAM1,PVR
GO: Cellular Component	GO:0030424	axon		0.000911	8	174	TGFB1,GOT1,SNCG,P2RX4,CALCA,KATNA1,STMN2,GRIK3
GO: Cellular Component	GO:0012505	endomembrane system		0.001637	29	1418	ST8SIA6,CDC42EP2,TOR1AIP2,SAR1B,RAB6B,ITGB3,SYT12,SELE,GALNT1,VPS45,BCAP29,ABCC4,INSIG1,ZMPSTE24,DHCR24,ALG5,PTGIS,ANPEP,TMED9,CH25H,TMEM173,CD36,MGST2,NDST1,CSGALNACT1,ATP2C1,RTN1,PIGU,ANTXR2
GO: Cellular Component	GO:0044421	extracellular region part		0.002633	22	1002	SMOC2,TGFB1,KIT,THBD,BGN,ADAM19,ADAM28,SELE,BMP6,SEPP1,CXCL16,ADAMTS9,VCAM1,GPIHBP1,IL1A,CALCA,HMCN1,LAMC1,FLRT3,SERPINE2,ICAM1,PVR
GO: Cellular Component	GO:0005789	endoplasmic reticulum membrane		0.002751	15	577	TOR1AIP2,SAR1B,BCAP29,INSIG1,ZMPSTE24,DHCR24,ALG5,PTGIS,TMED9,CH25H,TMEM173,MGST2,RTN1,PIGU,ANTXR2
GO: Cellular Component	GO:0033267	axon part		0.003176	4	53	GOT1,P2RX4,CALCA,GRIK3
GO: Cellular Component	GO:0043195	terminal button		0.003186	3	26	P2RX4,CALCA,GRIK3
GO: Cellular Component	GO:0044432	endoplasmic reticulum part		0.003431	16	650	TOR1AIP2,PDIA5,SAR1B,BCAP29,INSIG1,ZMPSTE24,DHCR24,ALG5,PTGIS,TMED9,CH25H,TMEM173,MGST2,RTN1,PIGU,ANTXR2
GO: Cellular Component	GO:0042175	nuclear envelope-endoplasmic reticulum network		0.003553	15	593	TOR1AIP2,SAR1B,BCAP29,INSIG1,ZMPSTE24,DHCR24,ALG5,PTGIS,TMED9,CH25H,TMEM173,MGST2,RTN1,PIGU,ANTXR2
GO: Cellular Component	GO:0009897	external side of plasma membrane		0.003994	7	174	KIT,CD55,ITGB3,VCAM1,CD34,CTSB,ICAM1
GO: Cellular Component	GO:0031092	platelet alpha granule membrane		0.00555	2	10	ITGB3,CD36
GO: Cellular Component	GO:0043025	cell soma		0.006782	7	192	TGFB1,SNCG,EXOC4,P2RX4,FABP7,CALCA,GRIK3
GO: Cellular Component	GO:0042995	cell projection		0.007383	17	768	MERTK,TGFB1,FAM65B,GOT1,SNCG,EXOC4,P2RX4,HIF1A,DYNLT1,FABP7,VCAM1,CALCA,CXCR4,KATNA1,STMN2,FGD6,GRIK3
GO: Cellular Component	GO:0005819	spindle		0.007499	6	149	HSPB1,TBL1XR1,SNCG,CSPP1,KATNA1,CDC2
GO: Cellular Component	GO:0005615	extracellular space		0.008051	19	904	SMOC2,TGFB1,KIT,THBD,BGN,SELE,BMP6,SEPP1,CXCL16,ADAMTS9,VCAM1,GPIHBP1,IL1A,CALCA,HMCN1,LAMC1,SERPINE2,ICAM1,PVR
GO: Cellular Component	GO:0005794	Golgi apparatus		0.008442	20	974	ST8SIA6,TGFB1,RNF144A,SAR1B,RAB6B,GALNT1,TOX4,VPS45,ZMPSTE24,DHCR24,DYNLT1,NAT8,MCAM,PDE4B,CD36,MEST,NDST1,FGD6,CSGALNACT1,ATP2C1
GO: Cellular Component	GO:0033588	Elongator holoenzyme complex		0.011477	1	1	ELP4
GO: Cellular Component	GO:0005713	recombination nodule		0.011477	1	1	NAT8
GO: Cellular Component	GO:0005715	late recombination nodule		0.011477	1	1	NAT8
GO: Cellular Component	GO:0043005	neuron projection		0.011522	10	375	TGFB1,GOT1,SNCG,EXOC4,P2RX4,CALCA,CXCR4,KATNA1,STMN2,GRIK3
GO: Cellular Component	GO:0005811	lipid particle		0.012471	2	15	PLIN2,KATNA1
GO: Cellular Component	GO:0005783	endoplasmic reticulum		0.01262	20	1013	TOR1AIP2,PDIA5,SAR1B,PLIN2,BCAP29,INSIG1,ZMPSTE24,DHCR24,ALG5,PTGIS,NAT8,TMED9,IFNGR2,CH25H,TMEM173,MGST2,LAMC1,RTN1,PIGU,ANTXR2
GO: Cellular Component	GO:0030667	secretory granule membrane		0.013116	3	43	ITGB3,ABCC4,CD36
GO: Cellular Component	GO:0005578	proteinaceous extracellular matrix		0.016023	9	337	SMOC2,TGFB1,BGN,ADAM19,ADAM28,ADAMTS9,HMCN1,LAMC1,FLRT3
GO: Cellular Component	GO:0000267	cell fraction		0.018505	22	1192	MERTK,HSPB1,CD55,ACP1,GOT1,GALT,SERPINE1,ABCC4,SLC23A2,ZMPSTE24,RAB8B,ANPEP,DUSP6,PDE4D,PDE4B,CD36,MGST2,TSPAN13,STMN2,CTSB,CSGALNACT1,EIF2B1
GO: Cellular Component	GO:0030141	secretory granule		0.021437	7	241	TGFB1,KIT,ITGB3,SYT12,ABCC4,CLK3,CD36
GO: Cellular Component	GO:0031226	intrinsic to plasma membrane		0.025699	23	1303	MERTK,THBD,CD55,TNFAIP1,ITGB3,APLNR,P2RY2,P2RX4,SLC23A2,C3AR1,GPIHBP1,SCN7A,IL1R1,PCDHB15,ANPEP,IFNGR2,STAB1,CXCR4,CD36,TSPAN13,FLRT3,GRIK3,ICAM1
GO: Cellular Component	GO:0031012	extracellular matrix		0.025703	9	366	SMOC2,TGFB1,BGN,ADAM19,ADAM28,ADAMTS9,HMCN1,LAMC1,FLRT3
GO: Cellular Component	GO:0031091	platelet alpha granule		0.028959	3	58	TGFB1,ITGB3,CD36
GO: Cellular Component	GO:0000139	Golgi membrane		0.031723	10	442	ST8SIA6,SAR1B,RAB6B,GALNT1,VPS45,ZMPSTE24,DHCR24,NDST1,CSGALNACT1,ATP2C1
GO: Cellular Component	GO:0043259	laminin-10 complex		0.034038	1	3	LAMC1
GO: Cellular Component	GO:0031088	platelet dense granule membrane		0.034038	1	3	ABCC4
GO: Cellular Component	GO:0043260	laminin-11 complex		0.034038	1	3	LAMC1
GO: Cellular Component	GO:0031982	vesicle		0.03637	14	715	TGFB1,KIT,BGN,RAB6B,ITGB3,SYT12,APLNR,VPS45,ABCC4,CLK3,RAB8B,ANPEP,CD36,CTSB
GO: Cellular Component	GO:0005887	integral to plasma membrane		0.03639	22	1277	MERTK,THBD,CD55,TNFAIP1,ITGB3,APLNR,P2RY2,P2RX4,SLC23A2,C3AR1,SCN7A,IL1R1,PCDHB15,ANPEP,IFNGR2,STAB1,CXCR4,CD36,TSPAN13,FLRT3,GRIK3,ICAM1
GO: Cellular Component	GO:0030426	growth cone		0.04021	3	66	EXOC4,CXCR4,STMN2
GO: Cellular Component	GO:0030427	site of polarized growth		0.04175	3	67	EXOC4,CXCR4,STMN2
GO: Cellular Component	GO:0032580	Golgi cisterna membrane		0.04332	3	68	SAR1B,GALNT1,CSGALNACT1
GO: Cellular Component	GO:0044431	Golgi apparatus part		0.044416	11	534	ST8SIA6,TGFB1,SAR1B,RAB6B,GALNT1,VPS45,ZMPSTE24,DHCR24,NDST1,CSGALNACT1,ATP2C1
GO: Cellular Component	GO:0030175	filopodium		0.046197	2	30	FAM65B,VCAM1
GO: Cellular Component	GO:0005876	spindle microtubule		0.049018	2	31	TBL1XR1,CDC2
Human Phenotype	HP:0001316	Weak or absent deep tendon reflexes		0.002745	2	7	SAR1B,GBE1
Human Phenotype	HP:0002035	Rectal prolapse		0.003633	2	8	TGFB1,LAMC1
Human Phenotype	HP:0008209	Premature ovarian failure		0.005754	2	10	GALT,EIF2B1
Human Phenotype	HP:0001002	Decreased subcutaneous fat		0.008316	2	12	TGFB1,ZMPSTE24
Human Phenotype	HP:0001001	Abnormality of subcutaneous fat tissue		0.009756	2	13	TGFB1,ZMPSTE24
Human Phenotype	HP:0000711	Restlessness		0.011298	2	14	PAK3,SUOX
Human Phenotype	HP:0007325	Generalized dystonia		0.011844	1	1	SUOX
Human Phenotype	HP:0006570	Decreased liver function, progressive		0.011844	1	1	GALT
Human Phenotype	HP:0008838	Stippled calcification proximal humeral epiphyses		0.011844	1	1	GNPAT
Human Phenotype	HP:0005876	Joint contractures, progressive		0.011844	1	1	ANTXR2
Human Phenotype	HP:0004813	post-transfusion thrombocytopenia		0.011844	1	1	ITGB3
Human Phenotype	HP:0009064	Generalized lipodystrophy		0.011844	1	1	ZMPSTE24
Human Phenotype	HP:0008337	Prolonged bleeding time 15-to->30 minutes		0.011844	1	1	CD36
Human Phenotype	HP:0005533	Peripheral neutropenia		0.011844	1	1	CXCR4
Human Phenotype	HP:0005995	Decreased adipose tissue around neck		0.011844	1	1	ZMPSTE24
Human Phenotype	HP:0003901	Stippled calcification of the humeral epiphyses		0.011844	1	1	GNPAT
Human Phenotype	HP:0008183	Variable bleeding tendencies		0.011844	1	1	CD36
Human Phenotype	HP:0007950	Peripapillary chorioretinal atrophy		0.011844	1	1	TEAD1
Human Phenotype	HP:0005281	Hypoplastic nasal bridge		0.011844	1	1	DHCR24
Human Phenotype	HP:0005972	Respiratory acidosis		0.011844	1	1	DECR1
Human Phenotype	HP:0005791	Cortical thickening of long bone diaphyses		0.011844	1	1	TGFB1
Human Phenotype	HP:0001892	Bleeding diathesis		0.012611	3	42	ITGB3,SERPINE1,CD36
Human Phenotype	HP:0002968	Rhizomelic shortening		0.012941	2	15	GNPAT,DHCR24
Human Phenotype	HP:0004972	Elevated mean arterial pressure		0.018447	2	18	SELE,PTGIS
Human Phenotype	HP:0005117	Elevated diastolic blood pressure		0.018447	2	18	SELE,PTGIS
Human Phenotype	HP:0001315	Reduced reflexes		0.019369	5	135	HSPB1,SAR1B,GBE1,HMCN1,PRPS2
Human Phenotype	HP:0004421	Elevated systolic blood pressure		0.020467	2	19	SELE,PTGIS
Human Phenotype	HP:0003202	Amyotrophy		0.022972	5	141	TGFB1,HSPB1,GBE1,HMCN1,PRPS2
Human Phenotype	HP:0003891	Abnormality of the humeral epiphyses		0.023552	1	2	GNPAT
Human Phenotype	HP:0003839	Abnormality involving the epiphyses of the upper limbs		0.023552	1	2	GNPAT
Human Phenotype	HP:0004918	hyperchloremic metabolic acidosis		0.023552	1	2	GALT
Human Phenotype	HP:0003240	Increased phosphoribosylpyrophosphate (PRPP) synthetase		0.023552	1	2	PRPS2
Human Phenotype	HP:0003446	Sural nerve biopsy shows chronic axonal neuropathy		0.023552	1	2	HSPB1
Human Phenotype	HP:0004809	neonatal alloimmune thrombocytopenia		0.023552	1	2	ITGB3
Human Phenotype	HP:0005160	Total anomalous pulmonary venous return		0.023552	1	2	DHCR24
Human Phenotype	HP:0007683	Fundus with peripheral 'bony spicules'		0.023552	1	2	HMCN1
Human Phenotype	HP:0001902	Giant platelets		0.023552	1	2	CD36
Human Phenotype	HP:0001870	Acroosteolysis of distal phalanges (feet)		0.023552	1	2	ZMPSTE24
Human Phenotype	HP:0006375	Short, dumbbell femur		0.023552	1	2	GNPAT
Human Phenotype	HP:0006889	Mental retardation, borderline		0.023552	1	2	PAK3
Human Phenotype	HP:0004508	pancreatic insufficiency in 80%		0.023552	1	2	TGFB1
Human Phenotype	HP:0002601	Paresis of extensor muscles of the big toe is presenting symptom		0.023552	1	2	HSPB1
Human Phenotype	HP:0001975	Glanzmann thrombasthenia		0.023552	1	2	ITGB3
Human Phenotype	HP:0000905	Progressive acroosteolysis of the clavicle		0.023552	1	2	ZMPSTE24
Human Phenotype	HP:0003157	Progressive axonal neuropathy with demyelinization on electroneurography		0.023552	1	2	PRPS2
Human Phenotype	HP:0003714	Lower leg atrophy		0.023552	1	2	PRPS2
Human Phenotype	HP:0004807	thrombasthenia		0.023552	1	2	ITGB3
Human Phenotype	HP:0005253	Increased anterioposterior diameter of chest		0.023552	1	2	ZMPSTE24
Human Phenotype	HP:0008042	No light-evoked response on electroretinogram		0.023552	1	2	HMCN1
Human Phenotype	HP:0002610	Distal intestinal obstruction syndrome		0.023552	1	2	TGFB1
Human Phenotype	HP:0007543	Epidermal hyperkeratosis		0.023552	1	2	ZMPSTE24
Human Phenotype	HP:0006585	Thin, dysplastic bipartite clavicles		0.023552	1	2	ZMPSTE24
Human Phenotype	HP:0003142	Excessive purine production		0.023552	1	2	PRPS2
Human Phenotype	HP:0002161	Hyperlysinemia		0.023552	1	2	DECR1
Human Phenotype	HP:0007807	Optic nerve compression		0.023552	1	2	TGFB1
Human Phenotype	HP:0006914	Absence of sensory nerve conduction velocities		0.023552	1	2	HMCN1
Human Phenotype	HP:0007542	Absent pigmentation of ventral chest, abdomen and limbs		0.023552	1	2	KIT
Human Phenotype	HP:0004401	Meconium ileus		0.023552	1	2	TGFB1
Human Phenotype	HP:0004402	Meconium ileus in neonates		0.023552	1	2	TGFB1
Human Phenotype	HP:0006391	Overtubulated long bones		0.023552	1	2	ZMPSTE24
Human Phenotype	HP:0004350	Increased bone mineral density		0.024769	2	21	TGFB1,DHCR24
Human Phenotype	HP:0002034	Abnormality of the rectum		0.034366	2	25	TGFB1,LAMC1
Human Phenotype	HP:0007823	Bone corpuscle fundus pigmentation		0.035126	1	3	HMCN1
Human Phenotype	HP:0001072	Thickened skin		0.035126	1	3	ANTXR2
Human Phenotype	HP:0005561	Generalized abnormality of the bone marrow		0.035126	1	3	TGFB1
Human Phenotype	HP:0001344	Absent speech development		0.035126	1	3	PRPS2
Human Phenotype	HP:0002797	Osteolysis		0.035126	1	3	ANTXR2
Human Phenotype	HP:0009053	Muscle weakness, lower limb, distal		0.035126	1	3	HSPB1
Human Phenotype	HP:0002704	Delayed closure of cranial sutures		0.035126	1	3	ZMPSTE24
Human Phenotype	HP:0009839	Osteolytic defects of the distal phalanges of the hand		0.035126	1	3	ZMPSTE24
Human Phenotype	HP:0000320	Bird-like facies		0.035126	1	3	ZMPSTE24
Human Phenotype	HP:0009002	Loss of subcutaneous truncal adipose tissue		0.035126	1	3	ZMPSTE24
Human Phenotype	HP:0002598	Muscle weakness, distal (lower limbs more affected than upper limbs), due to motor neuronopathy		0.035126	1	3	HSPB1
Human Phenotype	HP:0003097	Short femurs		0.035126	1	3	GNPAT
Human Phenotype	HP:0009085	Alveolar ridge overgrowth		0.035126	1	3	DHCR24
Human Phenotype	HP:0004919	Galactose intolerance		0.035126	1	3	GALT
Human Phenotype	HP:0005061	short, dumbbell appearance of long bones		0.035126	1	3	GNPAT
Human Phenotype	HP:0005528	Bone marrow hypoplasia		0.035126	1	3	TGFB1
Human Phenotype	HP:0009763	Limb pain		0.035126	1	3	TGFB1
Human Phenotype	HP:0000418	Pinched nose		0.035126	1	3	ZMPSTE24
Human Phenotype	HP:0007119	Mental retardation, borderline-mild		0.035126	1	3	PAK3
Human Phenotype	HP:0000791	Uric acid urolithiasis		0.035126	1	3	PRPS2
Human Phenotype	HP:0002694	Sclerotic skull base		0.035126	1	3	TGFB1
Human Phenotype	HP:0001522	Death in infancy		0.03696	2	26	SUOX,ANTXR2
Human Phenotype	HP:0000818	Endocrine abnormality		0.037015	9	401	TGFB1,ITGB3,GALT,SELE,ZMPSTE24,PTGIS,PRPS2,CD36,EIF2B1
Human Phenotype	HP:0001871	Hematological abnormality		0.037594	10	469	TGFB1,KIT,SAR1B,ITGB3,GALT,SELE,SERPINE1,IFNGR2,CXCR4,CD36
Human Phenotype	HP:0002495	Impaired vibratory sense		0.039627	2	27	SAR1B,HMCN1
Human Phenotype	HP:0001928	Abnormality of coagulation		0.046469	3	69	ITGB3,SERPINE1,CD36
Human Phenotype	HP:0001799	Short nails		0.046567	1	4	ZMPSTE24
Human Phenotype	HP:0002613	Biliary cirrhosis		0.046567	1	4	TGFB1
Human Phenotype	HP:0002571	Achalasia		0.046567	1	4	HMCN1
Human Phenotype	HP:0000061	Ambiguous genitalia, female		0.046567	1	4	DHCR24
Human Phenotype	HP:0007394	Prominent superficial blood vessels		0.046567	1	4	ZMPSTE24
Human Phenotype	HP:0002579	Gastrointestinal dysmotility		0.046567	1	4	HMCN1
Human Phenotype	HP:0008887	Adipose tissue loss		0.046567	1	4	ZMPSTE24
Human Phenotype	HP:0001196	Short umbilical cord		0.046567	1	4	ZMPSTE24
Human Phenotype	HP:0000947	Dumbbell-shaped long bones		0.046567	1	4	GNPAT
Human Phenotype	HP:0003643	Sulfite oxidase deficiency		0.046567	1	4	SUOX
Human Phenotype	HP:0001648	Cor pulmonale		0.046567	1	4	TGFB1
Human Phenotype	HP:0001070	Mottled pigmentation		0.046567	1	4	ZMPSTE24
Human Phenotype	HP:0002832	Calcific stippling		0.046567	1	4	GNPAT
Human Phenotype	HP:0005613	Aplasia/hypoplasia of the femur		0.046567	1	4	GNPAT
Human Phenotype	HP:0000935	Thickened cortex of long bones		0.046567	1	4	TGFB1
Human Phenotype	HP:0000292	Loss of facial adipose tissue		0.046567	1	4	ZMPSTE24
Human Phenotype	HP:0003635	Loss of subcutaneous adipose tissue in limbs		0.046567	1	4	ZMPSTE24
Human Phenotype	HP:0004348	Abnormality of bone mineral density.		0.046833	4	117	TGFB1,GNPAT,DHCR24,ANTXR2
Mouse Phenotype	MP:0008713	abnormal cytokine level		0.000001	16	219	MERTK,TGFB1,KIT,THBD,TNFRSF10B,SELE,SERPINE1,HIF1A,C3AR1,PELI1,IL1A,IL1R1,PDE4D,CASP4,CD36,ICAM1
Mouse Phenotype	MP:0008835	abnormal intercellular signaling peptide or protein level		0.000001	16	223	MERTK,TGFB1,KIT,THBD,TNFRSF10B,SELE,SERPINE1,HIF1A,C3AR1,PELI1,IL1A,IL1R1,PDE4D,CASP4,CD36,ICAM1
Mouse Phenotype	MP:0002419	abnormal innate immunity		0.000003	20	369	MERTK,REL,THBD,CD55,TNFRSF10B,CFB,SELE,CXCL16,P2RX4,C3AR1,IL1A,IL1R1,EDIL3,TMEM173,PLAC8,PDE4D,PDE4B,CD36,SERPINE2,ICAM1
Mouse Phenotype	MP:0001790	abnormal immune system physiology		0.000006	45	1458	JAM3,MERTK,TGFB1,KIT,REL,THBD,CD55,TNFRSF10B,TNFAIP3,CFB,BGN,ITGB3,SELE,SERPINE1,GALNT1,SEPP1,CXCL16,P2RX4,ABCC4,CKS1B,HIF1A,C3AR1,VCAM1,PELI1,GADD45B,IL1A,IL1R1,IFNGR2,F11R,HCLS1,EDIL3,TMEM173,PLAC8,PDE4D,CASP4,CXCR4,PDE4B,CD36,NFIL3,NDST1,TP53INP1,ANTXR2,SERPINE2,ICAM1,PVR
Mouse Phenotype	MP:0008751	abnormal interleukin level		0.000007	12	149	TGFB1,KIT,THBD,TNFRSF10B,SELE,SERPINE1,C3AR1,PELI1,IL1A,IL1R1,CASP4,ICAM1
Mouse Phenotype	MP:0008719	impaired neutrophil recruitment		0.000007	7	44	SELE,C3AR1,IL1A,IL1R1,PDE4D,PDE4B,ICAM1
Mouse Phenotype	MP:0002723	abnormal immune serum protein physiology		0.000011	27	674	MERTK,TGFB1,KIT,REL,THBD,CD55,TNFRSF10B,TNFAIP3,CFB,SELE,SERPINE1,GALNT1,HIF1A,C3AR1,PELI1,GADD45B,IL1A,IL1R1,PDE4D,CASP4,CXCR4,PDE4B,CD36,NFIL3,SERPINE2,ICAM1,PVR
Mouse Phenotype	MP:0008469	abnormal protein level		0.000015	19	379	MERTK,TGFB1,KIT,THBD,TNFRSF10B,CFB,SELE,SERPINE1,GALNT1,HIF1A,ZMPSTE24,C3AR1,PELI1,IL1A,IL1R1,PDE4D,CASP4,CD36,ICAM1
Mouse Phenotype	MP:0003627	abnormal leukocyte rolling		0.000063	5	26	SELE,GALNT1,EDIL3,NDST1,ICAM1
Mouse Phenotype	MP:0002501	abnormal inflammatory mediator physiology		0.000064	21	497	MERTK,TGFB1,KIT,REL,THBD,TNFRSF10B,TNFAIP3,SELE,SERPINE1,HIF1A,C3AR1,PELI1,GADD45B,IL1A,IL1R1,PDE4D,CASP4,PDE4B,CD36,NFIL3,ICAM1
Mouse Phenotype	MP:0008588	abnormal circulating interleukin level		0.000078	9	108	THBD,TNFRSF10B,SELE,SERPINE1,C3AR1,PELI1,IL1A,IL1R1,CASP4
Mouse Phenotype	MP:0005416	abnormal circulating protein level		0.000147	15	302	MERTK,TGFB1,THBD,TNFRSF10B,CFB,SELE,SERPINE1,GALNT1,HIF1A,ZMPSTE24,C3AR1,PELI1,IL1A,IL1R1,CASP4
Mouse Phenotype	MP:0002463	abnormal neutrophil physiology		0.000177	9	120	SELE,C3AR1,IL1A,IL1R1,EDIL3,PLAC8,PDE4D,PDE4B,ICAM1
Mouse Phenotype	MP:0003628	abnormal leukocyte adhesion		0.000177	5	32	THBD,SELE,EDIL3,NDST1,ICAM1
Mouse Phenotype	MP:0008640	abnormal circulating interleukin-1 beta level		0.000198	4	18	THBD,C3AR1,IL1A,CASP4
Mouse Phenotype	MP:0002498	abnormal acute inflammation		0.0002	9	122	MERTK,THBD,SELE,SERPINE1,C3AR1,PELI1,IL1R1,CASP4,ICAM1
Mouse Phenotype	MP:0001657	abnormal induced morbidity/mortality		0.000251	15	317	MERTK,KIT,THBD,TNFRSF10B,TNFAIP3,SERPINE1,SEPP1,ABCC4,C3AR1,PELI1,PDE4B,CD36,TP53INP1,ANTXR2,ICAM1
Mouse Phenotype	MP:0002602	abnormal eosinophil cell number		0.000296	7	77	REL,SELE,GALNT1,C3AR1,IL1R1,CD34,ICAM1
Mouse Phenotype	MP:0008720	impaired neutrophil migration		0.000315	5	36	SELE,IL1R1,PDE4D,PDE4B,ICAM1
Mouse Phenotype	MP:0002872	polycythemia		0.000369	3	9	KIT,HIF1A,EGLN3
Mouse Phenotype	MP:0008589	abnormal circulating interleukin-1 level		0.000373	4	21	THBD,C3AR1,IL1A,CASP4
Mouse Phenotype	MP:0003156	abnormal leukocyte migration/homing		0.000405	6	58	THBD,SELE,GALNT1,EDIL3,NDST1,ICAM1
Mouse Phenotype	MP:0005061	abnormal eosinophil morphology		0.000437	7	82	REL,SELE,GALNT1,C3AR1,IL1R1,CD34,ICAM1
Mouse Phenotype	MP:0002441	abnormal granulocyte morphology		0.000513	13	267	JAM3,KIT,REL,TNFAIP3,SELE,SERPINE1,GALNT1,C3AR1,VCAM1,IL1R1,PLAC8,CD34,ICAM1
Mouse Phenotype	MP:0004804	decreased susceptibility to autoimmune diabetes		0.00052	5	40	MERTK,REL,IL1R1,IFNGR2,ICAM1
Mouse Phenotype	MP:0005025	abnormal response to infection		0.000606	16	382	JAM3,KIT,REL,TNFRSF10B,CFB,SELE,SERPINE1,SEPP1,IL1R1,IFNGR2,TMEM173,PLAC8,CD36,ANTXR2,ICAM1,PVR
Mouse Phenotype	MP:0005351	decreased susceptibility to autoimmune disorder		0.000682	8	115	MERTK,TGFB1,REL,CFB,C3AR1,IL1R1,IFNGR2,ICAM1
Mouse Phenotype	MP:0001819	abnormal immune cell physiology		0.000764	29	952	MERTK,TGFB1,KIT,REL,THBD,SELE,GALNT1,CXCL16,P2RX4,CKS1B,C3AR1,VCAM1,PELI1,GADD45B,IL1A,IL1R1,IFNGR2,F11R,HCLS1,EDIL3,PLAC8,PDE4D,CXCR4,PDE4B,CD36,NFIL3,NDST1,ICAM1,PVR
Mouse Phenotype	MP:0002421	abnormal cell-mediated immunity		0.000764	29	952	MERTK,TGFB1,KIT,REL,THBD,SELE,GALNT1,CXCL16,P2RX4,CKS1B,C3AR1,VCAM1,PELI1,GADD45B,IL1A,IL1R1,IFNGR2,F11R,HCLS1,EDIL3,PLAC8,PDE4D,CXCR4,PDE4B,CD36,NFIL3,NDST1,ICAM1,PVR
Mouse Phenotype	MP:0002420	abnormal adaptive immunity		0.000805	29	955	MERTK,TGFB1,KIT,REL,THBD,SELE,GALNT1,CXCL16,P2RX4,CKS1B,C3AR1,VCAM1,PELI1,GADD45B,IL1A,IL1R1,IFNGR2,F11R,HCLS1,EDIL3,PLAC8,PDE4D,CXCR4,PDE4B,CD36,NFIL3,NDST1,ICAM1,PVR
Mouse Phenotype	MP:0003277	esophageal papilloma		0.000845	2	3	KIT,ATP2C1
Mouse Phenotype	MP:0001793	altered susceptibility to infection		0.00086	15	356	JAM3,KIT,REL,TNFRSF10B,CFB,SELE,SERPINE1,SEPP1,IL1R1,IFNGR2,TMEM173,PLAC8,CD36,ANTXR2,ICAM1
Mouse Phenotype	MP:0002462	abnormal granulocyte physiology		0.000908	10	181	KIT,SELE,C3AR1,IL1A,IL1R1,EDIL3,PLAC8,PDE4D,PDE4B,ICAM1
Mouse Phenotype	MP:0008664	decreased interleukin-12 secretion		0.000932	3	12	REL,PELI1,GADD45B
Mouse Phenotype	MP:0009642	abnormal blood homeostasis		0.001075	37	1365	MERTK,TGFB1,KIT,THBD,CD55,TNFRSF10B,CFB,KLF4,ADD2,ITGB3,SELE,SERPINE1,GALNT1,ABCC4,INSIG1,HIF1A,SLC23A2,ZMPSTE24,DHCR24,C3AR1,DECR1,VCAM1,GPIHBP1,EGLN3,PELI1,IL1A,PTGIS,IL1R1,CALCA,CASP4,PXMP2,CD36,PLTP,NAMPT,NDST1,SERPINE2,ICAM1
Mouse Phenotype	MP:0005012	decreased eosinophil cell number		0.001165	4	28	GALNT1,C3AR1,IL1R1,CD34
Mouse Phenotype	MP:0001845	abnormal inflammatory response		0.001258	28	934	JAM3,MERTK,TGFB1,KIT,REL,THBD,TNFRSF10B,TNFAIP3,CFB,BGN,ITGB3,SELE,SERPINE1,ABCC4,HIF1A,C3AR1,PELI1,GADD45B,IL1A,IL1R1,PDE4D,CASP4,PDE4B,CD36,NFIL3,NDST1,TP53INP1,ICAM1
Mouse Phenotype	MP:0002442	abnormal leukocyte physiology		0.001302	28	936	MERTK,TGFB1,KIT,REL,THBD,SELE,GALNT1,CXCL16,P2RX4,CKS1B,C3AR1,VCAM1,PELI1,GADD45B,IL1A,IL1R1,IFNGR2,HCLS1,EDIL3,PLAC8,PDE4D,CXCR4,PDE4B,CD36,NFIL3,NDST1,ICAM1,PVR
Mouse Phenotype	MP:0002433	abnormal T-helper 1 cell morphology		0.001334	4	29	TGFB1,REL,GADD45B,IFNGR2
Mouse Phenotype	MP:0002425	altered susceptibility to autoimmune disorder		0.00137	10	191	MERTK,TGFB1,REL,CD55,CFB,C3AR1,GADD45B,IL1R1,IFNGR2,ICAM1
Mouse Phenotype	MP:0001544	abnormal cardiovascular system physiology		0.00138	29	987	MERTK,TGFB1,KIT,REL,THBD,ADD2,ADAM19,ITGB3,SERPINE1,APLNR,CXCL16,P2RX4,ABCC4,HIF1A,SLC23A2,ZMPSTE24,TEAD1,VCAM1,EGLN3,PTGIS,ATRNL1,CALCA,DUSP6,PLAC8,PDE4D,CXCR4,CD36,LAMC1,ICAM1
Mouse Phenotype	MP:0002488	abnormal phagocyte physiology		0.001531	14	338	MERTK,REL,SELE,CXCL16,P2RX4,C3AR1,IL1A,IL1R1,EDIL3,PLAC8,PDE4D,PDE4B,CD36,ICAM1
Mouse Phenotype	MP:0008639	decreased circulating interleukin-1 alpha level		0.001671	2	4	IL1A,CASP4
Mouse Phenotype	MP:0000532	kidney vascular congestion		0.001671	2	4	PTGIS,CXCR4
Mouse Phenotype	MP:0005179	decreased circulating cholesterol level		0.001706	7	103	KIT,SERPINE1,DHCR24,VCAM1,GPIHBP1,PLTP,ICAM1
Mouse Phenotype	MP:0008662	abnormal interleukin-12 secretion		0.001723	4	31	REL,TNFRSF10B,PELI1,GADD45B
Mouse Phenotype	MP:0000179	abnormal blood chemistry		0.001897	33	1203	MERTK,TGFB1,KIT,THBD,TNFRSF10B,CFB,KLF4,ADD2,SELE,SERPINE1,GALNT1,INSIG1,HIF1A,SLC23A2,ZMPSTE24,DHCR24,C3AR1,DECR1,VCAM1,GPIHBP1,EGLN3,PELI1,IL1A,PTGIS,IL1R1,CALCA,CASP4,PXMP2,CD36,PLTP,NAMPT,NDST1,ICAM1
Mouse Phenotype	MP:0005428	abnormal clinical chemistry		0.001978	34	1256	MERTK,TGFB1,KIT,THBD,CD55,TNFRSF10B,CFB,KLF4,ADD2,SELE,SERPINE1,GALNT1,INSIG1,HIF1A,SLC23A2,ZMPSTE24,DHCR24,C3AR1,DECR1,VCAM1,GPIHBP1,EGLN3,PELI1,IL1A,PTGIS,IL1R1,CALCA,CASP4,PXMP2,CD36,PLTP,NAMPT,NDST1,ICAM1
Mouse Phenotype	MP:0008088	abnormal T-helper 1 cell differentiation		0.002257	3	16	REL,GADD45B,IFNGR2
Mouse Phenotype	MP:0000249	abnormal blood vessel physiology		0.002479	12	279	TGFB1,KIT,SERPINE1,CXCL16,P2RX4,ABCC4,HIF1A,VCAM1,PTGIS,PLAC8,CXCR4,ICAM1
Mouse Phenotype	MP:0002473	impaired complement classical pathway		0.002755	2	5	CD55,CFB
Mouse Phenotype	MP:0008637	abnormal circulating interleukin-1 alpha level		0.002755	2	5	IL1A,CASP4
Mouse Phenotype	MP:0002472	impaired complement alternative pathway		0.002755	2	5	CD55,CFB
Mouse Phenotype	MP:0005564	increased hemoglobin content		0.003209	3	18	KIT,HIF1A,EGLN3
Mouse Phenotype	MP:0000333	decreased bone marrow cell number		0.003214	6	86	KIT,REL,RNF2,VCAM1,SOX17,CXCR4
Mouse Phenotype	MP:0000322	increased granulocyte number		0.003267	9	180	JAM3,KIT,REL,TNFAIP3,SELE,SERPINE1,VCAM1,PLAC8,ICAM1
Mouse Phenotype	MP:0003983	decreased cholesterol level		0.003524	7	117	KIT,SERPINE1,DHCR24,VCAM1,GPIHBP1,PLTP,ICAM1
Mouse Phenotype	MP:0002221	abnormal lymph organ size		0.003647	20	627	MERTK,TGFB1,KIT,REL,THBD,TNFRSF10B,ADD2,ITGB3,SELE,GALNT1,ABCC4,CKS1B,RNF2,ZMPSTE24,VCAM1,EGLN3,SOX17,GADD45B,DUSP6,NAMPT
Mouse Phenotype	MP:0002483	abnormal acute phase protein physiology		0.003764	3	19	THBD,IL1R1,SERPINE2
Mouse Phenotype	MP:0005367	renal/urinary system phenotype		0.003805	22	720	TGFB1,KIT,THBD,DAPK1,CD55,TNFAIP3,CFB,ADD2,ITGB3,SERPINE1,P2RX4,ABCC4,PTCD2,HIF1A,ZMPSTE24,BMPER,GADD45B,PTGIS,CALCA,CXCR4,PXMP2,LAMC1
Mouse Phenotype	MP:0005502	abnormal urinary system physiology		0.004011	15	416	KIT,THBD,DAPK1,CD55,TNFAIP3,SERPINE1,P2RX4,ABCC4,HIF1A,GADD45B,PTGIS,CALCA,CXCR4,PXMP2,LAMC1
Mouse Phenotype	MP:0008752	abnormal tumor necrosis factor level		0.004032	6	90	MERTK,THBD,SERPINE1,PELI1,PDE4D,ICAM1
Mouse Phenotype	MP:0003301	peptic ulcer		0.004087	2	6	TGFB1,KIT
Mouse Phenotype	MP:0002224	abnormal spleen size		0.004115	16	459	MERTK,TGFB1,KIT,REL,THBD,ADD2,ITGB3,SELE,ABCC4,CKS1B,RNF2,VCAM1,EGLN3,SOX17,GADD45B,DUSP6
Mouse Phenotype	MP:0002534	type IV hypersensitivity reaction		0.004681	5	65	SELE,IL1R1,IFNGR2,F11R,ICAM1
Mouse Phenotype	MP:0003829	impaired febrile response		0.005658	2	7	IL1A,IL1R1
Mouse Phenotype	MP:0000180	abnormal circulating cholesterol level		0.006112	9	198	KIT,SERPINE1,INSIG1,DHCR24,VCAM1,GPIHBP1,CD36,PLTP,ICAM1
Mouse Phenotype	MP:0005370	liver/biliary system phenotype		0.006507	21	706	MERTK,TGFB1,KIT,REL,THBD,TNFAIP3,ADD2,PLIN2,ITGB3,SELE,SERPINE1,SEPP1,PTCD2,INSIG1,RNF2,HIF1A,C3AR1,DECR1,EGLN3,SOX17,PXMP2
Mouse Phenotype	MP:0005385	cardiovascular system phenotype		0.006756	35	1402	MERTK,TGFB1,KIT,REL,THBD,ADD2,ADAM19,ITGB3,SELE,SERPINE1,APLNR,CXCL16,P2RX4,ABCC4,PTCD2,HIF1A,SLC23A2,ZMPSTE24,TEAD1,VCAM1,EGLN3,PTGIS,ATRNL1,CALCA,ANPEP,DUSP6,F11R,PLAC8,PDE4D,CXCR4,CD36,MEST,LAMC1,FLRT3,ICAM1
Mouse Phenotype	MP:0000691	enlarged spleen		0.006766	12	316	MERTK,KIT,REL,THBD,ADD2,ITGB3,SELE,RNF2,VCAM1,EGLN3,GADD45B,DUSP6
Mouse Phenotype	MP:0005087	decreased acute inflammation		0.006814	5	71	SELE,PELI1,IL1R1,CASP4,ICAM1
Mouse Phenotype	MP:0000334	decreased granulocyte number		0.007072	6	101	KIT,SELE,GALNT1,C3AR1,IL1R1,CD34
Mouse Phenotype	MP:0006410	abnormal common myeloid progenitor cell morphology		0.007226	5	72	KIT,REL,SELE,RNF2,CD34
Mouse Phenotype	MP:0003629	abnormal leukocyte transmigration		0.007396	3	24	SELE,EDIL3,ICAM1
Mouse Phenotype	MP:0004220	abnormal peripheral nervous system regeneration		0.007461	2	8	LAMC1,SERPINE2
Mouse Phenotype	MP:0008504	abnormal adrenal chromaffin cell morphology		0.007461	2	8	SLC23A2,EGLN3
Mouse Phenotype	MP:0001846	increased inflammatory response		0.008881	18	587	JAM3,MERTK,TGFB1,KIT,REL,TNFAIP3,CFB,BGN,ITGB3,SELE,SERPINE1,ABCC4,HIF1A,GADD45B,IL1R1,CD36,TP53INP1,ICAM1
Mouse Phenotype	MP:0001844	autoimmune response		0.009146	10	249	MERTK,TGFB1,REL,CD55,CFB,C3AR1,GADD45B,IL1R1,IFNGR2,ICAM1
Mouse Phenotype	MP:0002827	abnormal renal corpuscle morphology		0.009149	9	211	TGFB1,KIT,CD55,CFB,SERPINE1,BMPER,GADD45B,PTGIS,LAMC1
Mouse Phenotype	MP:0003009	abnormal cytokine secretion		0.009291	14	413	MERTK,TGFB1,REL,TNFRSF10B,TNFAIP3,SELE,HIF1A,C3AR1,PELI1,GADD45B,IL1A,IL1R1,PDE4B,NFIL3
Mouse Phenotype	MP:0005005	abnormal self tolerance		0.009395	10	250	MERTK,TGFB1,REL,CD55,CFB,C3AR1,GADD45B,IL1R1,IFNGR2,ICAM1
Mouse Phenotype	MP:0008250	abnormal myeloid leukocyte morphology		0.009455	15	457	JAM3,TGFB1,KIT,REL,TNFAIP3,SELE,SERPINE1,GALNT1,RNF2,C3AR1,VCAM1,IL1R1,PLAC8,CD34,ICAM1
Mouse Phenotype	MP:0000324	increased mast cell number		0.009488	2	9	KIT,SELE
Mouse Phenotype	MP:0008641	increased circulating interleukin-1 beta level		0.009488	2	9	THBD,C3AR1
Mouse Phenotype	MP:0002471	abnormal complement cascade		0.009488	2	9	CD55,CFB
Mouse Phenotype	MP:0002414	abnormal myeloblast morphology/development		0.009623	20	684	MERTK,TGFB1,KIT,REL,SELE,GALNT1,CKS1B,RNF2,C3AR1,VCAM1,PELI1,GADD45B,IL1R1,IFNGR2,HCLS1,CXCR4,CD34,NFIL3,NAMPT,ICAM1
Mouse Phenotype	MP:0002412	increased susceptibility to bacterial infection		0.009636	8	176	JAM3,REL,CFB,SELE,SERPINE1,IL1R1,IFNGR2,CD36
Mouse Phenotype	MP:0009763	increased sensitivity to induced morbidity/mortality		0.009909	10	252	MERTK,KIT,THBD,TNFAIP3,SERPINE1,SEPP1,ABCC4,C3AR1,CD36,TP53INP1
Mouse Phenotype	MP:0000217	abnormal leukocyte cell number		0.009934	24	877	JAM3,MERTK,TGFB1,KIT,REL,TNFRSF10B,TNFAIP3,SELE,SERPINE1,GALNT1,CKS1B,RNF2,C3AR1,VCAM1,SOX17,GADD45B,IL1R1,HCLS1,PLAC8,CXCR4,CD34,NFIL3,NAMPT,ICAM1
Mouse Phenotype	MP:0000465	gastrointestinal hemorrhage		0.010304	3	27	THBD,ITGB3,CXCR4
Mouse Phenotype	MP:0005000	abnormal immune tolerance		0.011002	10	256	MERTK,TGFB1,REL,CD55,CFB,C3AR1,GADD45B,IL1R1,IFNGR2,ICAM1
Mouse Phenotype	MP:0002406	increased susceptibility to infection		0.011041	11	296	JAM3,KIT,REL,CFB,SELE,SERPINE1,SEPP1,IL1R1,IFNGR2,TMEM173,CD36
Mouse Phenotype	MP:0000343	altered response to myocardial infarction		0.011307	4	52	KIT,THBD,DUSP6,CD36
Mouse Phenotype	MP:0008734	decreased susceptibility to endotoxin shock		0.011307	4	52	PELI1,IL1R1,CASP4,ICAM1
Mouse Phenotype	MP:0005281	increased fatty acid level		0.0114	3	28	INSIG1,DECR1,CD36
Mouse Phenotype	MP:0002335	decreased airway responsiveness		0.011729	2	10	C3AR1,CALCA
Mouse Phenotype	MP:0008646	abnormal circulating interleukin-12b level		0.011729	2	10	TNFRSF10B,PELI1
Mouse Phenotype	MP:0002135	abnormal kidney morphology		0.011756	16	513	TGFB1,KIT,THBD,CD55,CFB,ADD2,ITGB3,SERPINE1,PTCD2,HIF1A,ZMPSTE24,BMPER,GADD45B,PTGIS,CXCR4,LAMC1
Mouse Phenotype	MP:0003947	abnormal cholesterol level		0.011845	9	220	KIT,SERPINE1,INSIG1,DHCR24,VCAM1,GPIHBP1,CD36,PLTP,ICAM1
Mouse Phenotype	MP:0002148	hypersensitivity		0.011993	6	113	SELE,C3AR1,IL1R1,IFNGR2,F11R,ICAM1
Mouse Phenotype	MP:0002118	abnormal lipid homeostasis		0.012028	14	426	KIT,SERPINE1,GNPAT,ABCC4,INSIG1,DHCR24,DECR1,FABP7,VCAM1,GPIHBP1,PTGIS,CD36,PLTP,ICAM1
Mouse Phenotype	MP:0005088	increased acute inflammation		0.012074	4	53	MERTK,THBD,SERPINE1,C3AR1
Mouse Phenotype	MP:0000685	abnormal immune system morphology		0.012343	33	1350	JAM3,MERTK,TGFB1,KIT,REL,THBD,TNFRSF10B,TNFAIP3,ADD2,ITGB3,SELE,SERPINE1,GALNT1,ABCC4,CKS1B,RNF2,ZMPSTE24,C3AR1,VCAM1,EGLN3,SOX17,PELI1,GADD45B,IL1R1,DUSP6,IFNGR2,HCLS1,PLAC8,CXCR4,CD34,NFIL3,NAMPT,ICAM1
Mouse Phenotype	MP:0004951	abnormal spleen weight		0.01249	6	114	TGFB1,THBD,ADD2,SELE,CKS1B,DUSP6
Mouse Phenotype	MP:0001547	abnormal lipid level		0.012531	13	385	KIT,SERPINE1,ABCC4,INSIG1,DHCR24,DECR1,FABP7,VCAM1,GPIHBP1,PTGIS,CD36,PLTP,ICAM1
Mouse Phenotype	MP:0008597	decreased circulating interleukin-6 level		0.012562	3	29	SERPINE1,PELI1,IL1R1
Mouse Phenotype	MP:0002398	abnormal bone marrow cell morphology/development		0.012674	24	895	MERTK,TGFB1,KIT,REL,THBD,ADD2,ITGB3,SELE,GALNT1,CKS1B,RNF2,C3AR1,VCAM1,SOX17,PELI1,GADD45B,IL1R1,IFNGR2,HCLS1,CXCR4,CD34,NFIL3,NAMPT,ICAM1
Mouse Phenotype	MP:0008076	abnormal CD4-positive T cell differentiation		0.012874	4	54	REL,C3AR1,GADD45B,IFNGR2
Mouse Phenotype	MP:0005278	abnormal cholesterol homeostasis		0.01358	9	225	KIT,SERPINE1,INSIG1,DHCR24,VCAM1,GPIHBP1,CD36,PLTP,ICAM1
Mouse Phenotype	MP:0008595	abnormal circulating interleukin-6 level		0.013707	4	55	THBD,SERPINE1,PELI1,IL1R1
Mouse Phenotype	MP:0009815	decreased prostaglandin level		0.014179	2	11	ABCC4,PTGIS
Mouse Phenotype	MP:0008642	decreased circulating interleukin-1 beta level		0.014179	2	11	IL1A,CASP4
Mouse Phenotype	MP:0004187	cardia bifida		0.014179	2	11	HIF1A,FLRT3
Mouse Phenotype	MP:0000689	abnormal spleen morphology		0.014258	18	616	MERTK,TGFB1,KIT,REL,THBD,ADD2,ITGB3,SELE,GALNT1,ABCC4,CKS1B,RNF2,VCAM1,EGLN3,SOX17,GADD45B,DUSP6,CD34
Mouse Phenotype	MP:0002222	abnormal lymph organ cellularity		0.01462	12	350	TGFB1,KIT,REL,SELE,GALNT1,ABCC4,ZMPSTE24,VCAM1,EGLN3,SOX17,GADD45B,NAMPT
Mouse Phenotype	MP:0002620	abnormal monocyte morphology		0.016378	5	88	REL,SELE,RNF2,VCAM1,ICAM1
Mouse Phenotype	MP:0000530	abnormal kidney vasculature		0.01644	3	32	HIF1A,PTGIS,CXCR4
Mouse Phenotype	MP:0008030	abnormal Cajal-Retzius cell morphology		0.016828	2	12	KIT,LAMC1
Mouse Phenotype	MP:0002452	abnormal antigen presenting cell physiology		0.016874	18	627	MERTK,REL,GALNT1,CXCL16,P2RX4,CKS1B,C3AR1,VCAM1,PELI1,GADD45B,IL1R1,IFNGR2,F11R,HCLS1,CXCR4,CD36,ICAM1,PVR
Mouse Phenotype	MP:0003665	endophthalmitis		0.016964	1	1	CD36
Mouse Phenotype	MP:0002194	maximal tonic hindlimb extension seizures		0.016964	1	1	KIAA0467
Mouse Phenotype	MP:0009310	large intestine adenocarcinoma		0.016964	1	1	TGFB1
Mouse Phenotype	MP:0001775	abnormal selenium level		0.016964	1	1	SEPP1
Mouse Phenotype	MP:0009314	colon adenocarcinoma		0.016964	1	1	TGFB1
Mouse Phenotype	MP:0004034	belly blaze		0.016964	1	1	KIT
Mouse Phenotype	MP:0004878	increased systemic vascular resistance		0.016964	1	1	CALCA
Mouse Phenotype	MP:0004823	increased susceptibility to experimental autoimmune myasthenia gravis		0.016964	1	1	CD55
Mouse Phenotype	MP:0004018	abnormal galactose homeostasis		0.016964	1	1	GALT
Mouse Phenotype	MP:0009316	anal adenocarcinoma		0.016964	1	1	TGFB1
Mouse Phenotype	MP:0002193	minimal clonic seizures		0.016964	1	1	KIAA0467
Mouse Phenotype	MP:0002794	lenticonus		0.016964	1	1	GNPAT
Mouse Phenotype	MP:0006088	abnormal blood-cerebrospinal fluid barrier function		0.016964	1	1	ABCC4
Mouse Phenotype	MP:0009536	abnormal interstitial cell of Cajal morphology		0.016964	1	1	KIT
Mouse Phenotype	MP:0001013	enlarged superior cervical ganglion		0.016964	1	1	EGLN3
Mouse Phenotype	MP:0003664	ocular pterygium		0.016964	1	1	CD36
Mouse Phenotype	MP:0009315	rectum adenocarcinoma		0.016964	1	1	TGFB1
Mouse Phenotype	MP:0009537	interstitial cells of Cajal hyperplasia		0.016964	1	1	KIT
Mouse Phenotype	MP:0001854	atrial endocarditis		0.016964	1	1	TGFB1
Mouse Phenotype	MP:0000521	abnormal kidney cortex		0.017172	9	234	TGFB1,KIT,CD55,CFB,SERPINE1,BMPER,GADD45B,PTGIS,LAMC1
Mouse Phenotype	MP:0005338	atherosclerotic lesions		0.01738	4	59	SERPINE1,CXCL16,VCAM1,ICAM1
Mouse Phenotype	MP:0005602	decreased angiogenesis		0.01738	4	59	SERPINE1,HIF1A,F11R,ICAM1
Mouse Phenotype	MP:0008750	abnormal interferon level		0.01738	4	59	TGFB1,KIT,TNFRSF10B,PELI1
Mouse Phenotype	MP:0000598	abnormal liver morphology		0.017578	17	583	MERTK,TGFB1,KIT,REL,THBD,ADD2,ITGB3,SELE,SERPINE1,SEPP1,PTCD2,INSIG1,RNF2,HIF1A,DECR1,EGLN3,SOX17
Mouse Phenotype	MP:0009676	abnormal hemostasis		0.018095	8	197	MERTK,TGFB1,KIT,THBD,CD55,ITGB3,GALNT1,SERPINE2
Mouse Phenotype	MP:0002551	abnormal blood coagulation		0.018095	8	197	MERTK,TGFB1,KIT,THBD,CD55,ITGB3,GALNT1,SERPINE2
Mouse Phenotype	MP:0002136	abnormal kidney physiology		0.0181	11	318	KIT,DAPK1,CD55,TNFAIP3,SERPINE1,ABCC4,HIF1A,GADD45B,PTGIS,CXCR4,LAMC1
Mouse Phenotype	MP:0005325	abnormal renal glomerulus morphology		0.019114	8	199	TGFB1,KIT,CD55,CFB,SERPINE1,BMPER,GADD45B,LAMC1
Mouse Phenotype	MP:0003991	arteriosclerosis		0.019425	4	61	SERPINE1,CXCL16,VCAM1,ICAM1
Mouse Phenotype	MP:0000172	abnormal bone marrow cell number		0.019631	6	126	KIT,REL,RNF2,VCAM1,SOX17,CXCR4
Mouse Phenotype	MP:0002487	abnormal fibrinogen physiology		0.01967	2	13	THBD,SERPINE2
Mouse Phenotype	MP:0003037	increased infarction size		0.01967	2	13	KIT,THBD
Mouse Phenotype	MP:0002782	abnormal testicular secretion		0.01967	2	13	TGFB1,KLF4
Mouse Phenotype	MP:0000717	abnormal lymphocyte cell number		0.02054	19	688	MERTK,TGFB1,KIT,REL,TNFRSF10B,TNFAIP3,SELE,GALNT1,CKS1B,RNF2,C3AR1,VCAM1,GADD45B,IL1R1,HCLS1,CXCR4,NFIL3,NAMPT,ICAM1
Mouse Phenotype	MP:0002722	abnormal immune system organ morphology		0.020584	22	834	MERTK,TGFB1,KIT,REL,THBD,TNFRSF10B,ADD2,ITGB3,SELE,GALNT1,ABCC4,CKS1B,RNF2,ZMPSTE24,VCAM1,EGLN3,SOX17,GADD45B,DUSP6,CXCR4,CD34,NAMPT
Mouse Phenotype	MP:0002138	abnormal liver/biliary system morphology		0.02141	17	596	MERTK,TGFB1,KIT,REL,THBD,ADD2,ITGB3,SELE,SERPINE1,SEPP1,PTCD2,INSIG1,RNF2,HIF1A,DECR1,EGLN3,SOX17
Mouse Phenotype	MP:0002014	papilloma		0.022545	3	36	KIT,CD34,ATP2C1
Mouse Phenotype	MP:0001862	interstitial pneumonia		0.022698	2	14	TGFB1,IL1R1
Mouse Phenotype	MP:0000516	abnormal urinary system morphology		0.023709	16	556	TGFB1,KIT,THBD,CD55,CFB,ADD2,ITGB3,SERPINE1,PTCD2,HIF1A,ZMPSTE24,BMPER,GADD45B,PTGIS,CXCR4,LAMC1
Mouse Phenotype	MP:0002459	abnormal B cell physiology		0.024176	13	420	MERTK,REL,GALNT1,CKS1B,C3AR1,VCAM1,PELI1,GADD45B,IL1R1,IFNGR2,HCLS1,CXCR4,PVR
Mouse Phenotype	MP:0002225	abnormal spleen cellularity		0.024215	8	208	TGFB1,KIT,REL,SELE,VCAM1,EGLN3,SOX17,GADD45B
Mouse Phenotype	MP:0009786	decreased susceptibility to infection induced morbidity/mortality		0.02424	3	37	TNFRSF10B,ANTXR2,ICAM1
Mouse Phenotype	MP:0003131	increased erythrocyte cell number		0.02424	3	37	KIT,HIF1A,EGLN3
Mouse Phenotype	MP:0003881	abnormal nephron morphology		0.025407	10	292	TGFB1,KIT,CD55,CFB,SERPINE1,PTCD2,BMPER,GADD45B,PTGIS,LAMC1
Mouse Phenotype	MP:0004939	abnormal B cell morphology		0.0259	13	424	MERTK,KIT,REL,GALNT1,CKS1B,RNF2,VCAM1,PELI1,GADD45B,IFNGR2,HCLS1,CXCR4,NAMPT
Mouse Phenotype	MP:0001473	reduced long term potentiation		0.026883	5	100	ADD2,P2RX4,PAK3,GRIK3,SERPINE2
Mouse Phenotype	MP:0000336	decreased mast cell number		0.029283	2	16	KIT,SELE
Mouse Phenotype	MP:0001739	abnormal adrenal gland secretion		0.029283	2	16	SLC23A2,EGLN3
Mouse Phenotype	MP:0009697	abnormal copulation		0.029283	2	16	TGFB1,THBD
Mouse Phenotype	MP:0005164	abnormal response to injury		0.029463	9	257	KIT,THBD,CD55,SERPINE1,DUSP6,CD36,LAMC1,SERPINE2,ICAM1
Mouse Phenotype	MP:0009785	altered susceptibility to infection induced morbidity/mortality		0.029725	3	40	TNFRSF10B,ANTXR2,ICAM1
Mouse Phenotype	MP:0005563	abnormal hemoglobin content		0.030054	5	103	KIT,ADD2,ITGB3,HIF1A,EGLN3
Mouse Phenotype	MP:0004019	abnormal vitamin homeostasis		0.031687	3	41	PLIN2,SLC23A2,PLTP
Mouse Phenotype	MP:0002816	colitis		0.031846	4	71	TGFB1,ABCC4,TP53INP1,ICAM1
Mouse Phenotype	MP:0002921	abnormal post-tetanic potentiation		0.032826	2	17	ADD2,GRIK3
Mouse Phenotype	MP:0002468	abnormal complement physiology		0.032826	2	17	CD55,CFB
Mouse Phenotype	MP:0005503	abnormal tendon morphology		0.032826	2	17	BGN,PCOLCE
Mouse Phenotype	MP:0004858	abnormal nervous system regeneration		0.032826	2	17	LAMC1,SERPINE2
Mouse Phenotype	MP:0003946	renal necrosis		0.032826	2	17	ITGB3,PTGIS
Mouse Phenotype	MP:0008482	decreased spleen germinal center number		0.032826	2	17	REL,GALNT1
Mouse Phenotype	MP:0009641	kidney degeneration		0.032826	2	17	ITGB3,PTGIS
Mouse Phenotype	MP:0000184	abnormal circulating HDL cholesterol level		0.033295	4	72	KIT,GPIHBP1,CD36,PLTP
Mouse Phenotype	MP:0009515	gastrointestinal stromal tumor		0.033643	1	2	KIT
Mouse Phenotype	MP:0008010	gastric adenocarcinoma		0.033643	1	2	TGFB1
Mouse Phenotype	MP:0004155	increased resistance to induced pancreatitis		0.033643	1	2	CTSB
Mouse Phenotype	MP:0003882	abnormal pulse pressure		0.033643	1	2	ADD2
Mouse Phenotype	MP:0001652	colonic necrosis		0.033643	1	2	TGFB1
Mouse Phenotype	MP:0003305	proctitis		0.033643	1	2	TGFB1
Mouse Phenotype	MP:0006265	increased pulse pressure		0.033643	1	2	ADD2
Mouse Phenotype	MP:0009511	distended stomach		0.033643	1	2	KIT
Mouse Phenotype	MP:0006323	abnormal extraembryonic mesoderm development		0.033643	1	2	TGFB1
Mouse Phenotype	MP:0009495	abnormal common bile duct morphology		0.033643	1	2	SOX17
Mouse Phenotype	MP:0009476	enlarged cecum		0.033643	1	2	KIT
Mouse Phenotype	MP:0003285	gastric hypertrophy		0.033643	1	2	KLF4
Mouse Phenotype	MP:0001857	pericarditis		0.033643	1	2	TGFB1
Mouse Phenotype	MP:0009752	enhanced behavioral response to nicotine		0.033643	1	2	CALCA
Mouse Phenotype	MP:0003175	reversion by mitotic recombination		0.033643	1	2	KIT
Mouse Phenotype	MP:0001653	gastric necrosis		0.033643	1	2	TGFB1
Mouse Phenotype	MP:0001858	intestinal inflammation		0.034635	5	107	TGFB1,TNFAIP3,ABCC4,TP53INP1,ICAM1
Mouse Phenotype	MP:0008568	abnormal interleukin secretion		0.034916	9	265	TGFB1,REL,TNFRSF10B,HIF1A,C3AR1,PELI1,GADD45B,IL1A,IL1R1
Mouse Phenotype	MP:0005460	abnormal leukopoiesis		0.03515	18	680	MERTK,TGFB1,KIT,REL,SELE,CKS1B,RNF2,C3AR1,VCAM1,PELI1,GADD45B,IL1R1,IFNGR2,HCLS1,CXCR4,NFIL3,NAMPT,ICAM1
Mouse Phenotype	MP:0004180	failure of initiation of embryo turning		0.03581	3	43	TEAD1,SOX17,FLRT3
Mouse Phenotype	MP:0005466	abnormal T-helper 2 physiology		0.03581	3	43	C3AR1,GADD45B,IFNGR2
Mouse Phenotype	MP:0002445	abnormal mononuclear leukocyte differentiation		0.036354	17	634	MERTK,TGFB1,KIT,REL,CKS1B,RNF2,C3AR1,VCAM1,PELI1,GADD45B,IL1R1,IFNGR2,HCLS1,CXCR4,NFIL3,NAMPT,ICAM1
Mouse Phenotype	MP:0008392	decreased primordial germ cell number		0.036528	2	18	KIT,CXCR4
Mouse Phenotype	MP:0008289	abnormal adrenal medulla morphology		0.036528	2	18	SLC23A2,EGLN3
Mouse Phenotype	MP:0002123	abnormal hematopoiesis		0.03735	31	1353	JAM3,MERTK,TGFB1,KIT,REL,THBD,TNFRSF10B,TNFAIP3,ADD2,ITGB3,SELE,SERPINE1,GALNT1,CKS1B,RNF2,HIF1A,C3AR1,VCAM1,EGLN3,SOX17,PELI1,GADD45B,IL1R1,IFNGR2,HCLS1,PLAC8,CXCR4,CD34,NFIL3,NAMPT,ICAM1
Mouse Phenotype	MP:0008246	abnormal leukocyte morphology		0.037573	26	1090	JAM3,MERTK,TGFB1,KIT,REL,TNFRSF10B,TNFAIP3,SELE,SERPINE1,GALNT1,CKS1B,RNF2,C3AR1,VCAM1,SOX17,PELI1,GADD45B,IL1R1,IFNGR2,HCLS1,PLAC8,CXCR4,CD34,NFIL3,NAMPT,ICAM1
Mouse Phenotype	MP:0000693	spleen hyperplasia		0.037868	4	75	KIT,SELE,VCAM1,GADD45B
Mouse Phenotype	MP:0004952	increased spleen weight		0.039469	4	76	THBD,ADD2,SELE,DUSP6
Mouse Phenotype	MP:0000270	abnormal heart tube morphology		0.040196	3	45	HIF1A,TEAD1,FLRT3
Mouse Phenotype	MP:0008944	decreased sensitivity to induced cell death		0.040196	3	45	TNFRSF10B,DUSP6,ANTXR2
Mouse Phenotype	MP:0008735	increased susceptibility to endotoxin shock		0.040196	3	45	MERTK,THBD,C3AR1
Mouse Phenotype	MP:0008391	abnormal primordial germ cell morphology		0.040383	2	19	KIT,CXCR4
Mouse Phenotype	MP:0004805	absent oocytes		0.040383	2	19	KIT,CDC2
Mouse Phenotype	MP:0002779	abnormal sex gland secretion		0.040383	2	19	TGFB1,KLF4
Mouse Phenotype	MP:0000716	abnormal immune system cell morphology		0.041935	26	1101	JAM3,MERTK,TGFB1,KIT,REL,TNFRSF10B,TNFAIP3,SELE,SERPINE1,GALNT1,CKS1B,RNF2,C3AR1,VCAM1,SOX17,PELI1,GADD45B,IL1R1,IFNGR2,HCLS1,PLAC8,CXCR4,CD34,NFIL3,NAMPT,ICAM1
Mouse Phenotype	MP:0002429	abnormal blood cell morphology/development		0.042447	31	1367	JAM3,MERTK,TGFB1,KIT,REL,THBD,TNFRSF10B,TNFAIP3,ADD2,ITGB3,SELE,SERPINE1,GALNT1,CKS1B,RNF2,HIF1A,C3AR1,VCAM1,EGLN3,SOX17,PELI1,GADD45B,IL1R1,IFNGR2,HCLS1,PLAC8,CXCR4,CD34,NFIL3,NAMPT,ICAM1
Mouse Phenotype	MP:0008801	abnormal erythroid progenitor cell morphology		0.042487	3	46	KIT,SELE,CD34
Mouse Phenotype	MP:0000186	decreased circulating HDL cholesterol level		0.042487	3	46	KIT,GPIHBP1,PLTP
Mouse Phenotype	MP:0002888	abnormal NMDA-mediated synaptic currents		0.044384	2	20	FABP7,SERPINE2
Mouse Phenotype	MP:0008531	increased chemical nociceptive threshold		0.044384	2	20	ABCC4,CALCA
Mouse Phenotype	MP:0001011	abnormal superior cervical ganglion morphology		0.044384	2	20	HIF1A,EGLN3
Mouse Phenotype	MP:0003962	abnormal adrenaline level		0.044384	2	20	SLC23A2,EGLN3
Mouse Phenotype	MP:0004884	abnormal testicular physiology		0.044384	2	20	TGFB1,KLF4
Mouse Phenotype	MP:0008098	decreased plasma cell number		0.044384	2	20	GALNT1,CXCR4
Mouse Phenotype	MP:0003304	large intestinal inflammation		0.044502	4	79	TGFB1,ABCC4,TP53INP1,ICAM1
Mouse Phenotype	MP:0005616	decreased susceptibility to type IV hypersensitivity reaction		0.044842	3	47	IL1R1,IFNGR2,ICAM1
Mouse Phenotype	MP:0002619	abnormal lymphocyte morphology		0.04529	21	851	MERTK,TGFB1,KIT,REL,TNFRSF10B,TNFAIP3,SELE,GALNT1,CKS1B,RNF2,C3AR1,VCAM1,PELI1,GADD45B,IL1R1,IFNGR2,HCLS1,CXCR4,NFIL3,NAMPT,ICAM1
Mouse Phenotype	MP:0001800	abnormal humoral immune response		0.046012	11	368	REL,CD55,CFB,GALNT1,C3AR1,VCAM1,GADD45B,IL1R1,HCLS1,CXCR4,PVR
Mouse Phenotype	MP:0005048	thrombosis		0.046257	4	80	MERTK,TGFB1,THBD,ITGB3
Mouse Phenotype	MP:0000218	increased leukocyte cell number		0.046388	15	556	JAM3,MERTK,TGFB1,KIT,REL,TNFRSF10B,TNFAIP3,SELE,SERPINE1,GALNT1,VCAM1,GADD45B,PLAC8,NFIL3,ICAM1
Mouse Phenotype	MP:0008844	decreased subcutaneous adipose tissue amount		0.047261	3	48	SERPINE1,ZMPSTE24,DHCR24
Mouse Phenotype	MP:0005178	increased circulating cholesterol level		0.04791	5	117	SERPINE1,INSIG1,GPIHBP1,CD36,PLTP
Mouse Phenotype	MP:0001588	abnormal hemoglobin		0.04791	5	117	KIT,ADD2,ITGB3,HIF1A,EGLN3
Mouse Phenotype	MP:0001823	thymus hypoplasia		0.04849	6	156	TGFB1,KIT,ABCC4,ZMPSTE24,SOX17,NAMPT
Mouse Phenotype	MP:0008439	abnormal cortical plate morphology		0.048525	2	21	HIF1A,LAMC1
Mouse Phenotype	MP:0005145	increased circulating VLDL cholesterol level		0.048525	2	21	GPIHBP1,PLTP
Mouse Phenotype	MP:0002334	abnormal airway responsiveness		0.048525	2	21	C3AR1,CALCA
Mouse Phenotype	MP:0002330	abnormal bronchial provocation		0.048525	2	21	C3AR1,CALCA
Mouse Phenotype	MP:0003300	gastrointestinal ulcer		0.048525	2	21	TGFB1,KIT
Mouse Phenotype	MP:0009764	decreased sensitivity to induced morbidity/mortality		0.049744	3	49	PELI1,PDE4B,ANTXR2
Mouse Phenotype	MP:0000230	abnormal blood pressure		0.049751	6	157	ADD2,APLNR,P2RX4,EGLN3,PTGIS,CALCA
Domain	IPR013151	Ig	InterPro	0.00027	9	164	JAM3,MERTK,KIT,VCAM1,IL1R1,HMCN1,F11R,MCAM,PVR
Domain	PF00047	ig	Pfam	0.00027	9	164	JAM3,MERTK,KIT,VCAM1,IL1R1,HMCN1,F11R,MCAM,PVR
Domain	PS00022	EGF_1	PROSITE	0.000984	9	196	THBD,ADAM19,ITGB3,ADAM28,SELE,HMCN1,EDIL3,STAB1,LAMC1
Domain	IPR013032	EGF_like_reg	InterPro	0.001095	9	199	THBD,ADAM19,ITGB3,ADAM28,SELE,HMCN1,EDIL3,STAB1,LAMC1
Domain	PF00754	F5_F8_type_C	Pfam	0.001251	3	17	EDIL3,DCBLD1,BTBD9
Domain	IPR000421	Coagulation_factor_5/8-type_C	InterPro	0.001251	3	17	EDIL3,DCBLD1,BTBD9
Domain	PS01186	EGF_2	PROSITE	0.001394	9	206	THBD,ADAM19,ITGB3,ADAM28,SELE,HMCN1,EDIL3,STAB1,LAMC1
Domain	PF00233	PDEase_I	Pfam	0.00175	3	19	PDE4D,PDE4B,PDE7B
Domain	PS00126	PDEASE_I	PROSITE	0.002039	3	20	PDE4D,PDE4B,PDE7B
Domain	IPR002073	PDEase	InterPro	0.002039	3	20	PDE4D,PDE4B,PDE7B
Domain	PF00008	EGF	Pfam	0.002133	6	103	THBD,ITGB3,SELE,HMCN1,EDIL3,STAB1
Domain	IPR006209	EGF_like	InterPro	0.002133	6	103	THBD,ITGB3,SELE,HMCN1,EDIL3,STAB1
Domain	SM00471	HDc	SMART	0.002356	3	21	PDE4D,PDE4B,PDE7B
Domain	IPR003607	Met-dep_phosphohydro_HD	InterPro	0.002356	3	21	PDE4D,PDE4B,PDE7B
Domain	IPR003987	ICAM_VCAM_N	InterPro	0.002394	2	6	VCAM1,ICAM1
Domain	IPR009134	VEGFR_N	InterPro	0.003323	2	7	KIT,HMCN1
Domain	PS50234	VWFA	PROSITE	0.003861	4	50	CFB,ITGB3,HMCN1,ANTXR2
Domain	IPR006025	Pept_M_Zn_BS	InterPro	0.004324	5	83	ADAM19,ADAM28,ZMPSTE24,ADAMTS9,ANPEP
Domain	PS00142	ZINC_PROTEASE	PROSITE	0.00503	5	86	ADAM19,ADAM28,ZMPSTE24,ADAMTS9,ANPEP
Domain	IPR000742	EGF_3	InterPro	0.006264	7	169	THBD,ADAM19,ADAM28,SELE,HMCN1,EDIL3,STAB1
Domain	IPR008979	Gal_bd	InterPro	0.00878	4	63	EDIL3,DCBLD1,LAMC1,BTBD9
Domain	PS50026	EGF_3	PROSITE	0.008992	7	181	THBD,ADAM19,ADAM28,SELE,HMCN1,EDIL3,STAB1
Domain	IPR003598	Ig_sub2	InterPro	0.009191	6	139	JAM3,KIT,VCAM1,HMCN1,F11R,MCAM
Domain	SM00408	IGc2	SMART	0.009191	6	139	JAM3,KIT,VCAM1,HMCN1,F11R,MCAM
Domain	SM00409	IG	SMART	0.009884	8	230	JAM3,MERTK,KIT,VCAM1,IL1R1,HMCN1,MCAM,ICAM1
Domain	IPR003599	Ig_sub	InterPro	0.009884	8	230	JAM3,MERTK,KIT,VCAM1,IL1R1,HMCN1,MCAM,ICAM1
Domain	PF01562	Pep_M12B_propep	Pfam	0.010167	3	35	ADAM19,ADAM28,ADAMTS9
Domain	IPR002870	Peptidase_M12B_N	InterPro	0.010167	3	35	ADAM19,ADAM28,ADAMTS9
Domain	IPR013783	Ig-like_fold	InterPro	0.01177	11	388	JAM3,MERTK,KIT,REL,VCAM1,IL1R1,HMCN1,F11R,MCAM,ICAM1,PVR
Domain	PF00084	Sushi	Pfam	0.011846	3	37	CD55,CFB,SELE
Domain	SM00181	EGF	SMART	0.011902	6	147	THBD,ADAM28,SELE,HMCN1,EDIL3,STAB1
Domain	IPR006210	EGF	InterPro	0.011902	6	147	THBD,ADAM28,SELE,HMCN1,EDIL3,STAB1
Domain	PS00546	CYSTEINE_SWITCH	PROSITE	0.012742	3	38	ADAM19,ADAM28,ADAMTS9
Domain	PF01421	Reprolysin	Pfam	0.012742	3	38	ADAM19,ADAM28,ADAMTS9
Domain	IPR001935	Calcitonin_A	InterPro	0.012889	1	1	CALCA
Domain	IPR009904	INSIG	InterPro	0.012889	1	1	INSIG1
Domain	IPR008083	CD34	InterPro	0.012889	1	1	CD34
Domain	IPR003904	APJ_rcpt	InterPro	0.012889	1	1	APLNR
Domain	IPR001644	C3A_anaphtx_rcpt	InterPro	0.012889	1	1	C3AR1
Domain	PF08127	Propeptide_C1	Pfam	0.012889	1	1	CTSB
Domain	PF04593	SelP_C	Pfam	0.012889	1	1	SEPP1
Domain	PF08162	NUC189	Pfam	0.012889	1	1	WDR43
Domain	IPR012979	DUF_NUC189_C	InterPro	0.012889	1	1	WDR43
Domain	G3DSA:3.90.420.10	Oxred_molyb_bd	Gene3D	0.012889	1	1	SUOX
Domain	IPR003295	InterleukinIL1A	InterPro	0.012889	1	1	IL1A
Domain	IPR002390	AnnexinIII	InterPro	0.012889	1	1	ANXA3
Domain	IPR005066	Mo-co_dimer	InterPro	0.012889	1	1	SUOX
Domain	IPR007672	SelP_C	InterPro	0.012889	1	1	SEPP1
Domain	IPR012920	Spb1_C	InterPro	0.012889	1	1	FTSJ3
Domain	IPR003934	EMP_3	InterPro	0.012889	1	1	EMP3
Domain	IPR007191	Sec8_exocyst	InterPro	0.012889	1	1	EXOC4
Domain	SM00226	LMWPc	SMART	0.012889	1	1	ACP1
Domain	IPR012599	Propeptide_C1A	InterPro	0.012889	1	1	CTSB
Domain	IPR001915	Peptidase_M48	InterPro	0.012889	1	1	ZMPSTE24
Domain	IPR009147	CysFib_conduc_TM	InterPro	0.012889	1	1	ABCC4
Domain	IPR000106	Low_mwt_PTPase	InterPro	0.012889	1	1	ACP1
Domain	IPR006042	Xan_ur_permease	InterPro	0.012889	1	1	SLC23A2
Domain	IPR007229	NAPRTase	InterPro	0.012889	1	1	NAMPT
Domain	IPR000356	P2U_purnocptor	InterPro	0.012889	1	1	P2RY2
Domain	PF03404	Mo-co_dimer	Pfam	0.012889	1	1	SUOX
Domain	IPR001321	HypoxindF1A	InterPro	0.012889	1	1	HIF1A
Domain	PF07281	INSIG	Pfam	0.012889	1	1	INSIG1
Domain	IPR008335	Euk_Mb_oxred	InterPro	0.012889	1	1	SUOX
Domain	PF04592	SelP_N	Pfam	0.012889	1	1	SEPP1
Domain	PF00174	Oxidored_molyb	Pfam	0.012889	1	1	SUOX
Domain	IPR007671	SelP_N	InterPro	0.012889	1	1	SEPP1
Domain	PS01116	XANTH_URACIL_PERMASE	PROSITE	0.012889	1	1	SLC23A2
Domain	IPR005755	Ribosomal_L13e/a	InterPro	0.012889	1	1	RPL13A
Domain	PF07780	Spb1_C	Pfam	0.012889	1	1	FTSJ3
Domain	IPR009906	DUF1445	InterPro	0.012889	1	1	C14orf159
Domain	IPR002115	Mammal_PTPase	InterPro	0.012889	1	1	ACP1
Domain	PF04095	NAPRTase	Pfam	0.012889	1	1	NAMPT
Domain	PF01435	Peptidase_M48	Pfam	0.012889	1	1	ZMPSTE24
Domain	PF04048	Sec8_exocyst	Pfam	0.012889	1	1	EXOC4
Domain	PF01451	LMWPc	Pfam	0.012889	1	1	ACP1
Domain	IPR012082	G3P_DHAP-acetyltrfase	InterPro	0.012889	1	1	GNPAT
Domain	PF07286	DUF1445	Pfam	0.012889	1	1	C14orf159
Domain	IPR003939	TGFb1	InterPro	0.012889	1	1	TGFB1
Domain	IPR012123	DHAPAT	InterPro	0.012889	1	1	GNPAT
Domain	IPR002462	Synuclein_gamma	InterPro	0.012889	1	1	SNCG
Domain	IPR001590	Peptidase_M12B	InterPro	0.013676	3	39	ADAM19,ADAM28,ADAMTS9
Domain	PS00427	DISINTEGRIN_1	PROSITE	0.013676	3	39	ADAM19,ADAM28,ADAMTS9
Domain	PS50215	ADAM_MEPRO	PROSITE	0.013676	3	39	ADAM19,ADAM28,ADAMTS9
Domain	PS50214	DISINTEGRIN_2	PROSITE	0.013676	3	39	ADAM19,ADAM28,ADAMTS9
Domain	SM00032	CCP	SMART	0.014647	3	40	CD55,CFB,SELE
Domain	IPR001762	Disintegrin	InterPro	0.014647	3	40	ADAM19,ADAM28,ADAMTS9
Domain	IPR001818	Pept_M10A_M12B	InterPro	0.014647	3	40	ADAM19,ADAM28,ADAMTS9
Domain	IPR007110	Ig-like	InterPro	0.014697	10	348	JAM3,MERTK,KIT,VCAM1,IL1R1,HMCN1,F11R,MCAM,ICAM1,PVR
Domain	PS01285	FA58C_1	PROSITE	0.015527	2	15	EDIL3,DCBLD1
Domain	SM00231	FA58C	SMART	0.015527	2	15	EDIL3,DCBLD1
Domain	PS50022	FA58C_3	PROSITE	0.015527	2	15	EDIL3,DCBLD1
Domain	PS01286	FA58C_2	PROSITE	0.015527	2	15	EDIL3,DCBLD1
Domain	IPR000436	Sushi_SCR_CCP	InterPro	0.016705	3	42	CD55,CFB,SELE
Domain	PS50835	IG_LIKE	PROSITE	0.019483	10	364	JAM3,MERTK,KIT,VCAM1,IL1R1,HMCN1,F11R,MCAM,ICAM1,PVR
Domain	PF08516	ADAM_CR	Pfam	0.019776	2	17	ADAM19,ADAM28
Domain	PF07974	EGF_2	Pfam	0.020081	3	45	ADAM19,ITGB3,STAB1
Domain	IPR013111	EGF_extracell	InterPro	0.020081	3	45	ADAM19,ITGB3,STAB1
Domain	PS50923	SUSHI	PROSITE	0.020081	3	45	CD55,CFB,SELE
Domain	SM00608	ACR	SMART	0.022062	2	18	ADAM19,ADAM28
Domain	IPR006586	ADAM_cysteine	InterPro	0.022062	2	18	ADAM19,ADAM28
Domain	PD000664	Disintegrin	ProDom	0.024452	2	19	ADAM19,ADAM28
Domain	PF02469	Fasciclin	Pfam	0.025612	1	2	STAB1
Domain	IPR000789	Cyc_dep_kin_rsub	InterPro	0.025612	1	2	CKS1B
Domain	IPR006687	SAR1_GTP_bd	InterPro	0.025612	1	2	SAR1B
Domain	PF03645	Tctex-1	Pfam	0.025612	1	2	DYNLT1
Domain	IPR008662	LAP1C	InterPro	0.025612	1	2	TOR1AIP2
Domain	PF02218	HS1_rep	Pfam	0.025612	1	2	HCLS1
Domain	PF02301	HORMA	Pfam	0.025612	1	2	MAD2L2
Domain	IPR000796	Asp_trans	InterPro	0.025612	1	2	GOT1
Domain	IPR011360	Compl_C2_B	InterPro	0.025612	1	2	CFB
Domain	PS51046	GON	PROSITE	0.025612	1	2	ADAMTS9
Domain	IPR003502	IL1_propep	InterPro	0.025612	1	2	IL1A
Domain	PS01020	SAR1	PROSITE	0.025612	1	2	SAR1B
Domain	PF05609	LAP1C	Pfam	0.025612	1	2	TOR1AIP2
Domain	PS50213	FAS1	PROSITE	0.025612	1	2	STAB1
Domain	PF01111	CKS	Pfam	0.025612	1	2	CKS1B
Domain	PS50815	HORMA	PROSITE	0.025612	1	2	MAD2L2
Domain	IPR005822	Ribosomal_L13	InterPro	0.025612	1	2	RPL13A
Domain	IPR008417	Bap31	InterPro	0.025612	1	2	BCAP29
Domain	IPR005428	CD36_antigen	InterPro	0.025612	1	2	CD36
Domain	IPR003511	HORMA_DNA_bd	InterPro	0.025612	1	2	MAD2L2
Domain	SM00178	SAR	SMART	0.025612	1	2	SAR1B
Domain	IPR008015	GMP_PDE_delta	InterPro	0.025612	1	2	PDE6D
Domain	IPR003989	VCAM-1	InterPro	0.025612	1	2	VCAM1
Domain	IPR004076	IL1R_rcpt	InterPro	0.025612	1	2	IL1R1
Domain	PS51090	CORTACTIN	PROSITE	0.025612	1	2	HCLS1
Domain	PF01130	CD36	Pfam	0.025612	1	2	CD36
Domain	IPR002159	CD36	InterPro	0.025612	1	2	CD36
Domain	IPR001491	Thrmbomoduln	InterPro	0.025612	1	2	THBD
Domain	PF00572	Ribosomal_L13	Pfam	0.025612	1	2	RPL13A
Domain	PF04117	Mpv17_PMP22	Pfam	0.025612	1	2	PXMP2
Domain	IPR003134	Hs1_Cortactin	InterPro	0.025612	1	2	HCLS1
Domain	IPR007248	Mpv17_PMP22	InterPro	0.025612	1	2	PXMP2
Domain	IPR006043	Xant/urac/vitC	InterPro	0.025612	1	2	SLC23A2
Domain	PF05351	GMP_PDE_delta	Pfam	0.025612	1	2	PDE6D
Domain	IPR000782	BIgH3_FAS1	InterPro	0.025612	1	2	STAB1
Domain	PF02394	IL1_propep	Pfam	0.025612	1	2	IL1A
Domain	SM00554	FAS1	SMART	0.025612	1	2	STAB1
Domain	IPR005334	Tctex	InterPro	0.025612	1	2	DYNLT1
Domain	PF04749	PLAC8	Pfam	0.025612	1	2	PLAC8
Domain	PF05529	Bap31	Pfam	0.025612	1	2	BCAP29
Domain	PF08242	Methyltransf_12	Pfam	0.025612	1	2	METTL6
Domain	IPR013217	Methyltransf_12	InterPro	0.025612	1	2	METTL6
Domain	IPR006461	DUF_Cys-rich	InterPro	0.025612	1	2	PLAC8
Domain	PF00860	Xan_ur_permease	Pfam	0.025612	1	2	SLC23A2
Domain	PD005152	Cyc_dep_kin_rsub	ProDom	0.025612	1	2	CKS1B
Domain	PS00945	CKS_2	PROSITE	0.025612	1	2	CKS1B
Domain	IPR002234	Anphylx_rcpt	InterPro	0.025612	1	2	C3AR1
Domain	IPR012314	Pept_M12B_GON-ADAMTSs	InterPro	0.025612	1	2	ADAMTS9
Domain	PS00944	CKS_1	PROSITE	0.025612	1	2	CKS1B
Domain	PS00783	RIBOSOMAL_L13	PROSITE	0.025612	1	2	RPL13A
Domain	SM00327	VWA	SMART	0.026479	3	50	CFB,ITGB3,HMCN1
Domain	SM00050	DISIN	SMART	0.026943	2	20	ADAM19,ADAM28
Domain	PF00200	Disintegrin	Pfam	0.026943	2	20	ADAM19,ADAM28
Domain	SM00005	DEATH	SMART	0.029531	2	21	DAPK1,TNFRSF10B
Domain	IPR001111	TGFb_N	InterPro	0.029531	2	21	TGFB1,BMP6
Domain	PF00688	TGFb_propeptide	Pfam	0.029531	2	21	TGFB1,BMP6
Domain	IPR003596	Ig_V-set_sub	InterPro	0.032213	2	22	F11R,PVR
Domain	SM00406	IGv	SMART	0.032213	2	22	F11R,PVR
Domain	IPR002035	VWF_A	InterPro	0.032293	3	54	CFB,ITGB3,HMCN1
Domain	SM00429	IPT	SMART	0.034988	2	23	REL,PLXNC1
Domain	SM00180	EGF_Lam	SMART	0.037852	2	24	STAB1,LAMC1
Domain	IPR003294	InterleukinIL1AB	InterPro	0.038173	1	3	IL1A
Domain	IPR004279	Perilipin	InterPro	0.038173	1	3	PLIN2
Domain	IPR005845	PG_PMM_ABAII	InterPro	0.038173	1	3	PGM2L1
Domain	PS00105	AA_TRANSFER_CLASS_1	PROSITE	0.038173	1	3	GOT1
Domain	IPR002163	Calcitonin_B	InterPro	0.038173	1	3	CALCA
Domain	IPR001446	5_LipOase_AP	InterPro	0.038173	1	3	MGST2
Domain	PS00258	CALCITONIN	PROSITE	0.038173	1	3	CALCA
Domain	PF07474	G2F	Pfam	0.038173	1	3	HMCN1
Domain	PF00485	PRK	Pfam	0.038173	1	3	UCK1
Domain	PF05790	C2-set	Pfam	0.038173	1	3	VCAM1
Domain	PD010631	Synuclein	ProDom	0.038173	1	3	SNCG
Domain	IPR006800	Pellino	InterPro	0.038173	1	3	PELI1
Domain	PF02230	Abhydrolase_2	Pfam	0.038173	1	3	LYPLA2
Domain	IPR006083	PRK_URK	InterPro	0.038173	1	3	UCK1
Domain	IPR013836	CD34/Podocalyxin	InterPro	0.038173	1	3	CD34
Domain	PF01918	Alba	Pfam	0.038173	1	3	C9orf23
Domain	PS50993	NIDOGEN_G2	PROSITE	0.038173	1	3	HMCN1
Domain	IPR004838	NHtransf_1_BS	InterPro	0.038173	1	3	GOT1
Domain	IPR013010	Znf_SIAH	InterPro	0.038173	1	3	RNF41
Domain	PS01297	FLAP_GST2_LTC4S	PROSITE	0.038173	1	3	MGST2
Domain	PF00214	Calc_CGRP_IAPP	Pfam	0.038173	1	3	CALCA
Domain	IPR003911	TGF_TGFb	InterPro	0.038173	1	3	TGFB1
Domain	IPR001693	Calcitonin-like	InterPro	0.038173	1	3	CALCA
Domain	IPR002775	Alba_bd	InterPro	0.038173	1	3	C9orf23
Domain	IPR000572	Oxred_molyb_bd	InterPro	0.038173	1	3	SUOX
Domain	IPR001058	Synuclein	InterPro	0.038173	1	3	SNCG
Domain	IPR006094	Oxid_FAD_bind_N	InterPro	0.038173	1	3	DHCR24
Domain	PS51081	ZF_SIAH	PROSITE	0.038173	1	3	RNF41
Domain	IPR007667	HIG_1_N	InterPro	0.038173	1	3	HIGD1A
Domain	PF01387	Synuclein	Pfam	0.038173	1	3	SNCG
Domain	PF03036	Perilipin	Pfam	0.038173	1	3	PLIN2
Domain	IPR002396	Selectin	InterPro	0.038173	1	3	SELE
Domain	PF04588	HIG_1_N	Pfam	0.038173	1	3	HIGD1A
Domain	PF01565	FAD_binding_4	Pfam	0.038173	1	3	DHCR24
Domain	IPR000649	IF-2B_related	InterPro	0.038173	1	3	EIF2B1
Domain	IPR009017	GFP_like	InterPro	0.038173	1	3	HMCN1
Domain	IPR006544	P-ATPase-V	InterPro	0.038173	1	3	ATP13A3
Domain	PF04710	Pellino	Pfam	0.038173	1	3	PELI1
Domain	IPR003140	PLP_Cesterase	InterPro	0.038173	1	3	LYPLA2
Domain	IPR006605	G2F	InterPro	0.038173	1	3	HMCN1
Domain	IPR000842	PRPP_synthetase	InterPro	0.038173	1	3	PRPS2
Domain	PF01008	IF-2B	Pfam	0.038173	1	3	EIF2B1
Domain	PS00559	MOLYBDOPTERIN_EUK	PROSITE	0.038173	1	3	SUOX
Domain	PF02879	PGM_PMM_II	Pfam	0.038173	1	3	PGM2L1
Domain	IPR008424	Ig_C2-set	InterPro	0.038173	1	3	VCAM1
Domain	PS00114	PRPP_SYNTHETASE	PROSITE	0.038173	1	3	PRPS2
Domain	SM00113	CALCITONIN	SMART	0.038173	1	3	CALCA
Domain	PS50027	EGF_LAM_2	PROSITE	0.040802	2	25	STAB1,LAMC1
Domain	PF00535	Glycos_transf_2	Pfam	0.040802	2	25	GALNT1,ALG5
Domain	PS01248	EGF_LAM_1	PROSITE	0.040802	2	25	STAB1,LAMC1
Domain	PF00531	Death	Pfam	0.040802	2	25	DAPK1,TNFRSF10B
Domain	IPR001173	Glyco_trans_2	InterPro	0.040802	2	25	GALNT1,ALG5
Domain	PF01833	TIG	Pfam	0.046951	2	27	REL,PLXNC1
Domain	IPR002909	IPT_TIG_rcpt	InterPro	0.046951	2	27	REL,PLXNC1
Domain	PF00053	Laminin_EGF	Pfam	0.046951	2	27	STAB1,LAMC1
Domain	SM00179	EGF_CA	SMART	0.047588	3	63	THBD,HMCN1,EDIL3
Pathway	hsa04640	Hematopoietic cell lineage	KEGG pathway	0.000035	8	87	KIT,CD55,ITGB3,IL1A,IL1R1,ANPEP,CD36,CD34
Pathway	h_lympathway	Adhesion and Diapedesis of Lymphocytes	CGAP BioCarta	0.000038	4	14	VCAM1,IL1A,CD34,ICAM1
Pathway	hif1_tfpathway	HIF-1-alpha transcription factor network	NCI-Nature Curated	0.000342	6	65	PLIN2,SERPINE1,HIF1A,EGLN3,PFKFB3,CXCR4
Pathway	h_LairPathway	Cells and Molecules involved in local acute inflammatory response	CGAP BioCarta	0.001467	3	16	VCAM1,IL1A,ICAM1
Pathway	LAIRPATHWAY	LAIRPATHWAY	MSigDB	0.001762	3	17	VCAM1,IL1A,ICAM1
Pathway	PW:0000360	the chronic hypoxic response - the hypoxia inducible factor - alpha	Pathway Ontology	0.003036	2	6	HIF1A,EGLN3
Pathway	hsa04610	Complement and coagulation cascades	KEGG pathway	0.003208	5	69	THBD,CD55,CFB,SERPINE1,C3AR1
Pathway	hsa04514	Cell adhesion molecules (CAMs)	KEGG pathway	0.003304	7	134	JAM3,SELE,VCAM1,F11R,CD34,ICAM1,PVR
Pathway	PW:0000031	purine metabolic	Pathway Ontology	0.003397	4	43	PRPS2,PDE4D,PDE4B,PDE7B
Pathway	hsa05211	Renal cell carcinoma	KEGG pathway	0.003632	5	71	TGFB1,HIF1A,PAK3,EGLN3,PIK3R3
Pathway	P00059	p53	PantherDB	0.004095	5	73	TNFRSF10B,SERPINE1,GADD45B,PIK3R3,CDC2
Pathway	h_nfkbPathway	NF-kB Signaling	CGAP BioCarta	0.004308	3	23	TNFAIP3,IL1A,IL1R1
Pathway	NFKBPATHWAY	NFKBPATHWAY	MSigDB	0.004308	3	23	TNFAIP3,IL1A,IL1R1
Pathway	NEUTROPHILPATHWAY	NEUTROPHILPATHWAY	MSigDB	0.005561	2	8	SELE,ICAM1
Pathway	h_neutrophilPathway	Neutrophil and Its Surface Molecules	CGAP BioCarta	0.005561	2	8	SELE,ICAM1
Pathway	h_nktPathway	Selective expression of chemokine receptors during T-cell polarization	CGAP BioCarta	0.006128	3	26	TGFB1,IFNGR2,CXCR4
Pathway	LYMPHOCYTEPATHWAY	LYMPHOCYTEPATHWAY	MSigDB	0.007082	2	9	SELE,ICAM1
Pathway	h_lymphocytePathway	Adhesion Molecules on Lymphocyte	CGAP BioCarta	0.007082	2	9	SELE,ICAM1
Pathway	nectin_pathway	Nectin adhesion pathway	NCI-Nature Curated	0.00756	3	28	ITGB3,F11R,PVR
Pathway	hsa04670	Leukocyte transendothelial migration	KEGG pathway	0.008264	6	121	JAM3,VCAM1,F11R,PIK3R3,CXCR4,ICAM1
Pathway	NKTPATHWAY	NKTPATHWAY	MSigDB	0.008344	3	29	TGFB1,IFNGR2,CXCR4
Pathway	h_il1rPathway	Signal transduction through IL1R	CGAP BioCarta	0.009174	3	30	TGFB1,IL1A,IL1R1
Pathway	MONOCYTEPATHWAY	MONOCYTEPATHWAY	MSigDB	0.010616	2	11	SELE,ICAM1
Pathway	h_monocytePathway	Monocyte and its Surface Molecules	CGAP BioCarta	0.010616	2	11	SELE,ICAM1
Pathway	109582	Hemostasis	Reactome	0.011775	5	94	TGFB1,THBD,ITGB3,SERPINE1,CD36
Pathway	IL1RPATHWAY	IL1RPATHWAY	MSigDB	0.011947	3	33	TGFB1,IL1A,IL1R1
Pathway	SMP00370	Tyrosinemia Type 3 (TYRO3)	SMPDB	0.014569	1	1	PDE6D
Pathway	PW:0000356	oxygen homeostasis	Pathway Ontology	0.014569	1	1	SERPINE1
Pathway	SMP00190	Hawkinsinuria	SMPDB	0.014569	1	1	PDE6D
Pathway	h_erythPathway	Erythrocyte Differentiation	CGAP BioCarta	0.014773	2	13	TGFB1,IL1A
Pathway	BREAST_CANCER_ESTROGEN_SIGNALING	BREAST_CANCER_ESTROGEN_SIGNALING	MSigDB	0.015692	5	101	KIT,HSPB1,SERPINE1,RPL13A,CTSB
Pathway	P00011	Blood coagulation	PantherDB	0.016316	3	37	THBD,ITGB3,SERPINE1
Pathway	hsa04115	p53 signaling pathway	KEGG pathway	0.017851	4	69	TNFRSF10B,SERPINE1,GADD45B,CDC2
Pathway	HSP27PATHWAY	HSP27PATHWAY	MSigDB	0.019514	2	15	HSPB1,IL1A
Pathway	ERYTHPATHWAY	ERYTHPATHWAY	MSigDB	0.019514	2	15	TGFB1,IL1A
Pathway	h_hsp27Pathway	Stress Induction of HSP Regulation	CGAP BioCarta	0.019514	2	15	HSPB1,IL1A
Pathway	h_granulocytesPathway	Adhesion and Diapedesis of Granulocytes	CGAP BioCarta	0.019514	2	15	IL1A,ICAM1
Pathway	PW:0000485	eicosanoids metabolic	Pathway Ontology	0.027641	2	18	PTGIS,MGST2
Pathway	hif1apathway	Hypoxic and oxygen homeostasis regulation of HIF-1-alpha	NCI-Nature Curated	0.027641	2	18	HIF1A,EGLN3
Pathway	PW:0000096	G2/M checkpoint	Pathway Ontology	0.028928	1	2	CDC2
Pathway	PW:0000385	G2/M DNA replication checkpoint	Pathway Ontology	0.028928	1	2	CDC2
Pathway	PW:0000037	sulfur metabolic	Pathway Ontology	0.028928	1	2	SUOX
Pathway	ASPARTATESYN-PWY	aspartate biosynthesis and degradation	BioCyc	0.028928	1	2	GOT1
Pathway	PW:0000091	G2/M transition	Pathway Ontology	0.028928	1	2	CDC2
Pathway	h_slrp2Pathway	Function of SLRP in Bone: An Integrated View	CGAP BioCarta	0.028928	1	2	TGFB1
Pathway	anthraxpathway	Cellular roles of Anthrax toxin	NCI-Nature Curated	0.030604	2	19	VCAM1,ANTXR2
Pathway	PW:0000543	protein kinase A (PKA) signaling	Pathway Ontology	0.030681	3	47	PDE4D,PDE4B,PDE7B
Pathway	avb3_integrin_pathway	Integrins in angiogenesis	NCI-Nature Curated	0.032389	3	48	ITGB3,F11R,EDIL3
Pathway	HYPERTROPHY_MODEL	HYPERTROPHY_MODEL	MSigDB	0.033686	2	20	IL1A,IL1R1
Pathway	P1-PWY	salvages of purine and pyrimidine nucleotides	BioCyc	0.033686	2	20	UCK1,PRPS2
Pathway	ST_WNT_CA2_CYCLIC_GMP_PATHWAY	ST_WNT_CA2CLICP_PATHWAY	MSigDB	0.033686	2	20	CFB,PDE6D
Pathway	hsa04060	Cytokine-cytokine receptor interaction	KEGG pathway	0.036902	8	262	TGFB1,KIT,TNFRSF10B,CXCL16,IL1A,IL1R1,IFNGR2,CXCR4
Pathway	hsa04210	Apoptosis	KEGG pathway	0.040508	4	89	TNFRSF10B,IL1A,IL1R1,PIK3R3
Pathway	PW:0000384	G2/M DNA damage checkpoint	Pathway Ontology	0.043079	1	3	CDC2
Pathway	h_vifPathway	HIV-1 defeats host-mediated resistance by CEM15	CGAP BioCarta	0.043079	1	3	CXCR4
Pathway	h_g1pPathway	Leloir of galactose metabolism	CGAP BioCarta	0.043079	1	3	GALT
Pathway	PW:0000088	G1/S transition	Pathway Ontology	0.043079	1	3	CDC2
Pathway	ASPBIO-PWY	aspartate biosynthesis II	BioCyc	0.043079	1	3	GOT1
Pathway	PW:0000459	apelin signaling	Pathway Ontology	0.043079	1	3	APLNR
Pathway	PW:0000320	novobiocin biosynthetic	Pathway Ontology	0.043079	1	3	GOT1
Pathway	GLUTFUMARATE-PWY	glutamine degradation II	BioCyc	0.043079	1	3	GOT1
Pathway	ASPARAGINE-BIOSYNTHESIS	asparagine biosynthesis I	BioCyc	0.043079	1	3	GOT1
Pathway	h_CCR3Pathway	CCR3 signaling in Eosinophils	CGAP BioCarta	0.043611	2	23	DECR1,PPP1R12B
Pathway	PW:0000243	vascular endothelial growth factor signaling	Pathway Ontology	0.047133	2	24	HIF1A,EGLN3
Pathway	txa2pathway	Thromboxane A2 receptor signaling	NCI-Nature Curated	0.047787	3	56	SELE,VCAM1,ICAM1
Pathway	hsa04530	Tight junction	KEGG pathway	0.048038	5	136	JAM3,EXOC4,F11R,HCLS1,ZAK
Pubmed	12871600	Genetic risk factors for cerebrovascular disease in children with sickle cell disease: design of a case-control association study and genomewide screen.		0	6	22	THBD,ITGB3,SELE,SERPINE1,VCAM1,ICAM1
Pubmed	18974842	Gender differences in genetic risk profiles for cardiovascular disease.		0	7	46	THBD,ITGB3,SELE,SERPINE1,VCAM1,IL1A,ICAM1
Pubmed	14557872	Evidence for substantial effect modification by gender in a large-scale genetic association study of the metabolic syndrome among coronary heart disease patients.		0	5	13	TGFB1,ITGB3,SELE,GBE1,IL1R1
Pubmed	19559392	A candidate gene association study of 77 polymorphisms in migraine.		0	7	52	TGFB1,ITGB3,SELE,SERPINE1,VCAM1,IL1A,ICAM1
Pubmed	16335952	Human plasma N-glycoproteome analysis by immunoaffinity subtraction, hydrazide chemistry, and mass spectrometry.		0	12	257	MERTK,TGFB1,KIT,CFB,ITGB3,SEPP1,VCAM1,ANPEP,PLTP,LAMC1,ICAM1,PVR
Pubmed	12673844	Activation of vascular endothelial cell adhesion molecule expression by sickle blood cells.		0	4	6	SELE,VCAM1,IL1A,ICAM1
Pubmed	15080580	Expression of endothelial protein C receptor and thrombomodulin in human coronary atherosclerotic plaques.		0	4	6	THBD,SELE,VCAM1,ICAM1
Pubmed	19729601	Candidate gene polymorphisms for ischemic stroke.		0	7	64	ITGB3,SELE,SERPINE1,VCAM1,IL1A,IL1R1,ICAM1
Pubmed	19131662	A meta-analysis of candidate gene polymorphisms and ischemic stroke in 6 study populations: association of lymphotoxin-alpha in nonhypertensive patients.		0	7	64	TGFB1,ITGB3,SELE,SERPINE1,VCAM1,IL1A,ICAM1
Pubmed	19578796	Association of genetic variants with chronic kidney disease in individuals with different lipid profiles.		0	9	152	TGFB1,THBD,SELE,SERPINE1,CXCL16,PTGIS,PDE4D,CD36,ICAM1
Pubmed	12172318	Soluble cell adhesion molecules in hypertensive concentric left ventricular hypertrophy.		0	3	3	SELE,VCAM1,ICAM1
Pubmed	11935152	Relation between glycaemic control, hyperinsulinaemia and plasma concentrations of soluble adhesion molecules in patients with impaired glucose tolerance or Type II diabetes.		0	3	3	SELE,VCAM1,ICAM1
Pubmed	18597403	Soluble endothelial cell adhesion molecules and their relationship to disease activity in Takayasu's arteritis.		0	3	3	SELE,VCAM1,ICAM1
Pubmed	15009098	Altered tissue expression pattern of cell adhesion molecules, ICAM-1, E-selectin and VCAM-1, in bullous pemphigoid during methotrexate therapy.		0	3	3	SELE,VCAM1,ICAM1
Pubmed	18791689	Blood serum levels of vascular cell adhesion molecule (sVCAM-1), intercellular adhesion molecule (sICAM-1) and endothelial leucocyte adhesion molecule-1 (ELAM-1) in diabetic retinopathy.		0	3	3	SELE,VCAM1,ICAM1
Pubmed	18035074	Association of polymorphisms in platelet and hemostasis system genes with acute myocardial infarction.		0	3	3	THBD,ITGB3,CD36
Pubmed	14984317	Effect of high glucose concentrations on expression of ELAM-1, VCAM-1 and ICAM-1 in HUVEC with and without cytokine activation.		0	3	3	SELE,VCAM1,ICAM1
Pubmed	17142773	Thiocyanate-dependent induction of endothelial cell adhesion molecule expression by phagocyte peroxidases: a novel HOSCN-specific oxidant mechanism to amplify inflammation.		0	3	3	SELE,VCAM1,ICAM1
Pubmed	12172576	Down regulation of endothelial adhesion molecules in node positive breast cancer: possible failure of host defence mechanism.		0	3	3	SELE,VCAM1,ICAM1
Pubmed	11882338	Serum levels of adhesion molecules correlate with insulin resistance.		0	3	3	SELE,VCAM1,ICAM1
Pubmed	18707907	Globotriaosylceramide induces oxidative stress and up-regulates cell adhesion molecule expression in Fabry disease endothelial cells.		0	3	3	SELE,VCAM1,ICAM1
Pubmed	12788528	Different mechanisms of adhesion molecule expression in human dermal microvascular endothelial cells by xanthoma tissue-mediated and copper-mediated oxidized low density lipoproteins.		0	3	3	SELE,VCAM1,ICAM1
Pubmed	18930765	Differential dose-dependent effects of prednisolone on shedding of endothelial adhesion molecules during human endotoxemia.		0	3	3	SELE,VCAM1,ICAM1
Pubmed	17963163	Soluble cell adhesion molecules (sICAM-1, sVCAM-1, and sE-selectin) in patients with early rheumatoid arthritis.		0	3	3	SELE,VCAM1,ICAM1
Pubmed	19136619	A long-acting glucagon-like peptide-1 analogue attenuates induction of plasminogen activator inhibitor type-1 and vascular adhesion molecules.		0	3	3	SERPINE1,VCAM1,ICAM1
Pubmed	18212564	Intermitted pharmacologic pretreatment by xenon, isoflurane, nitrous oxide, and the opioid morphine prevents tumor necrosis factor alpha-induced adhesion molecule expression in human umbilical vein endothelial cells.		0	3	3	SELE,VCAM1,ICAM1
Pubmed	15666579	Soluble adhesion molecules are not involved in the development of retinopathy in type 2 diabetic patients.		0	3	3	SELE,VCAM1,ICAM1
Pubmed	18197885	Comparison of soluble ICAM-1, VCAM-1 and E-selectin levels in patients with episodic cluster headache and giant cell arteritis.		0	3	3	SELE,VCAM1,ICAM1
Pubmed	19021457	Amniotic fluid adhesion molecules during parturition at term.		0	3	3	SELE,VCAM1,ICAM1
Pubmed	10477700	Human immunodeficiency virus-1 (HIV-1)-Tat protein promotes migration of acquired immunodeficiency syndrome-related lymphoma cells and enhances their adhesion to endothelial cells.		0	3	3	SELE,VCAM1,ICAM1
Pubmed	19237221	Proliferative diabetic retinopathy-The influence of diabetes control on the activation of the intraocular molecule system.		0	3	3	SELE,VCAM1,ICAM1
Pubmed	11983205	Quantification of the influence of mycophenolic acid on the release of endothelial adhesion molecules.		0	3	3	SELE,VCAM1,ICAM1
Pubmed	12086338	Expression of ICAM-1, VCAM-1, E-selectin and TNF-alpha on the endothelium of femoral and iliac arteries in thromboangiitis obliterans.		0	3	3	SELE,VCAM1,ICAM1
Pubmed	11847011	Circulating endothelial adhesion molecules (sE-selectin, sVCAM-1 and sICAM-1) during rHuG-CSF-stimulated stem cell mobilization.		0	3	3	SELE,VCAM1,ICAM1
Pubmed	19479237	Phenotype-genotype interactions on renal function in type 2 diabetes: an analysis using structural equation modelling.		0	6	57	TGFB1,SELE,SERPINE1,VCAM1,IL1A,ICAM1
Pubmed	19263529	Genetic risk factors in recurrent venous thromboembolism: A multilocus, population-based, prospective approach.		0	6	57	TGFB1,ITGB3,SELE,SERPINE1,IL1A,ICAM1
Pubmed	14534081	Stimulation of adhesion molecule expression in human endothelial cells (HUVEC) by adrenomedullin and corticotrophin.		0	3	4	SELE,VCAM1,ICAM1
Pubmed	16002039	Plasmodium falciparum malaria in south-west Nigerian children: is the polymorphism of ICAM-1 and E-selectin genes contributing to the clinical severity of malaria?		0	3	4	SELE,CD36,ICAM1
Pubmed	18692491	Evaluation of circulating vascular endothelial growth factor and soluble adhesion molecules as reliable predictors of native arteriovenous fistula thrombosis in chronic hemodialysis patients.		0	3	4	SELE,VCAM1,ICAM1
Pubmed	11776680	Localization and quantification of adhesion molecule expression in the lower uterine segment during premature labor.		0	3	4	SELE,VCAM1,ICAM1
Pubmed	9269771	Human immunodeficiency virus-1-tat protein induces the cell surface expression of endothelial leukocyte adhesion molecule-1, vascular cell adhesion molecule-1, and intercellular adhesion molecule-1 in human endothelial cells.		0	3	4	SELE,VCAM1,ICAM1
Pubmed	18828734	Adhesion molecule polymorphisms and pulse wave velocity in American youth.		0	3	4	SELE,VCAM1,ICAM1
Pubmed	12082592	Multi-locus interactions predict risk for post-PTCA restenosis: an approach to the genetic analysis of common complex disease.		0.000001	6	60	ITGB3,SELE,SERPINE1,IL1A,IL1R1,ICAM1
Pubmed	19028820	Polymorphisms in inflammatory genes and the risk of ischemic stroke and transient ischemic attack: results of a multilocus genotyping assay.		0.000001	5	33	TGFB1,SELE,VCAM1,IL1A,ICAM1
Pubmed	15304054	Intermittent high glucose enhances ICAM-1, VCAM-1, E-selectin and interleukin-6 expression in human umbilical endothelial cells in culture: the role of poly(ADP-ribose) polymerase.		0.000001	3	5	SELE,VCAM1,ICAM1
Pubmed	9290466	Circulating endothelial cell adhesion molecules as diagnostic markers for the early identification of pregnant women at risk for development of preeclampsia.		0.000001	3	5	SELE,VCAM1,ICAM1
Pubmed	17706337	Adhesion molecules changes at 20 gestation weeks in pregnancies complicated by preeclampsia.		0.000001	3	5	SELE,VCAM1,ICAM1
Pubmed	12940514	Circulating transforming growth factor-beta1, lipoprotein(a) and cellular adhesion molecules in angiographically assessed coronary artery disease.		0.000001	3	5	SELE,VCAM1,ICAM1
Pubmed	12595908	Variation in immune response genes and chronic Q fever. Concepts: preliminary test with post-Q fever fatigue syndrome.		0.000001	4	17	TGFB1,SELE,IL1R1,ICAM1
Pubmed	19225544	Variation in the lymphotoxin-alpha/tumor necrosis factor locus modifies risk of erythema nodosum in sarcoidosis.		0.000002	4	19	SELE,VCAM1,IL1A,ICAM1
Pubmed	17706953	Osteoprotegerin upregulates endothelial cell adhesion molecule response to tumor necrosis factor-alpha associated with induction of angiopoietin-2.		0.000002	3	6	SELE,VCAM1,ICAM1
Pubmed	18633131	Host immune gene polymorphisms in combination with clinical and demographic factors predict late survival in diffuse large B-cell lymphoma patients in the pre-rituximab era.		0.000003	5	44	SELE,VCAM1,IL1A,IFNGR2,ICAM1
Pubmed	15146197	Transcriptome characterization elucidates signaling networks that control human ES cell growth and differentiation.		0.000006	14	653	MERTK,KIT,REL,ADD2,SERPINE1,C10orf125,SPATS2,CKS1B,HIF1A,CDCA5,PCP4L1,CASP4,PDE4B,LAMC1
Pubmed	19487690	Plasminogen activator inhibitor-1 regulates integrin alphavbeta3 expression and autocrine transforming growth factor beta signaling.		0.000007	3	8	TGFB1,ITGB3,SERPINE1
Pubmed	19247692	Analyses of associations with asthma in four asthma population samples from Canada and Australia.		0.000007	6	92	TGFB1,SERPINE1,C3AR1,VCAM1,IL1A,IFNGR2
Pubmed	19573080	Common genetic variants in candidate genes and risk of familial lymphoid malignancies.		0.000009	7	145	REL,TNFRSF10B,VCAM1,IL1A,IL1R1,CASP4,ICAM1
Pubmed	12899665	Candidate genetic markers and the risk of restenosis after coronary angioplasty.		0.00001	3	9	ITGB3,SERPINE1,IL1A
Pubmed	19692168	Genetic Susceptibility to Distinct Bladder Cancer Subphenotypes.		0.00001	11	422	TGFB1,SELE,SEPP1,ABCC4,SLC23A2,VCAM1,IL1A,IFNGR2,MEST,CTSB,ICAM1
Pubmed	11233912	Donor cytokine genotype influences the development of acute rejection after renal transplantation.		0.00002	3	11	TGFB1,IL1A,IL1R1
Pubmed	15723707	Polymorphisms in immunoregulatory genes and the risk of histologic chorioamnionitis in Caucasoid women: a case control study.		0.00002	3	11	TGFB1,IL1A,IL1R1
Pubmed	15361128	Cytokine gene polymorphisms in Taiwan.		0.00002	3	11	TGFB1,IL1A,IL1R1
Pubmed	18974840	Identification of novel single nucleotide polymorphisms in inflammatory genes as risk factors associated with trachomatous trichiasis.		0.000022	4	33	TGFB1,SELE,IL1A,ICAM1
Pubmed	12020443	Mononuclear cell adhesion and cell adhesion molecule liberation after X-irradiation of activated endothelial cells in vitro.		0.000025	2	2	SELE,ICAM1
Pubmed	19417018	A vasculature-targeting regimen of preoperative docetaxel with or without bevacizumab for locally advanced breast cancer: impact on angiogenic biomarkers.		0.000025	2	2	SELE,VCAM1
Pubmed	16307159	Plasminogen activator inhibitor type 1 (PAI-1) and platelet glycoprotein IIIa (PGIIIa) polymorphisms in young Asian Indians with acute myocardial infarction.		0.000025	2	2	ITGB3,SERPINE1
Pubmed	12743121	Transforming growth factor-beta1 produced by ovarian cancer cell line HRA stimulates attachment and invasion through an up-regulation of plasminogen activator inhibitor type-1 in human peritoneal mesothelial cells.		0.000025	2	2	TGFB1,SERPINE1
Pubmed	15536192	Intracellular localization and constitutive endocytosis of CXCR4 in human CD34+ hematopoietic progenitor cells.		0.000025	2	2	CXCR4,CD34
Pubmed	18420209	ICAM1 and VCAM1 polymorphisms, coronary artery calcium, and circulating levels of soluble ICAM-1: the multi-ethnic study of atherosclerosis (MESA).		0.000025	2	2	VCAM1,ICAM1
Pubmed	15328163	Induction of plasminogen activator inhibitor I gene expression by intracellular calcium via hypoxia-inducible factor-1.		0.000025	2	2	SERPINE1,HIF1A
Pubmed	17642204	[The thrombin generation is associated with the PIA1/A2 beta3, integrin polymorphism in aspirin-treated patients with coronary artery disease: a role of statins]		0.000025	2	2	ITGB3,SERPINE1
Pubmed	18511598	Hypermethylation of CXCR4 promoter in CD34+ cells from patients with primary myelofibrosis.		0.000025	2	2	CXCR4,CD34
Pubmed	19597294	Expression of ICAM1 and VCAM1 serum levels in rheumatoid arthritis clinical activity. Association with genetic polymorphisms.		0.000025	2	2	VCAM1,ICAM1
Pubmed	17255534	Carbamylated low-density lipoprotein induces monocyte adhesion to endothelial cells through intercellular adhesion molecule-1 and vascular cell adhesion molecule-1.		0.000025	2	2	VCAM1,ICAM1
Pubmed	17599409	P2Y2 nucleotide receptor activation up-regulates vascular cell adhesion molecule-1 [corrected] expression and enhances lymphocyte adherence to a human submandibular gland cell line.		0.000025	2	2	P2RY2,VCAM1
Pubmed	18787016	Association of soluble cell adhesion molecules with ankle-brachial index in a biethnic cohort of predominantly hypertensive individuals.		0.000025	2	2	VCAM1,ICAM1
Pubmed	18790176	Expression of transforming growth factor-beta1 and hypoxia-inducible factor-1alpha in renal transplantation.		0.000025	2	2	TGFB1,HIF1A
Pubmed	17167725	Soluble VCAM-1 and E-selectin in breast cancer: relationship with staging and with the detection of circulating cancer cells.		0.000025	2	2	SELE,VCAM1
Pubmed	18083357	Epicardial fat thickness: relationship with plasma visfatin and plasminogen activator inhibitor-1 levels in visceral obesity.		0.000025	2	2	SERPINE1,NAMPT
Pubmed	12011765	Blood serum levels of soluble forms of adhesion molecules ICAM-1 (sICAM-1) and selectin E (s-selectin E) in patients with various phases of non-Hodgkin's lymphomas.		0.000025	2	2	SELE,ICAM1
Pubmed	12140283	Smad4/DPC4-dependent regulation of biglycan gene expression by transforming growth factor-beta in pancreatic tumor cells.		0.000025	2	2	TGFB1,BGN
Pubmed	12425801	[Genomic polymorphism within interleukin-1 family cytokines influences the outcome of septic patients]		0.000025	2	2	IL1A,IL1R1
Pubmed	17090406	Evidence of vascular damage in dengue disease: demonstration of high levels of soluble cell adhesion molecules and circulating endothelial cells.		0.000025	2	2	VCAM1,ICAM1
Pubmed	16564702	Action of intracellular IL-1Ra (Type 1) is independent of the IL-1 intracellular signalling pathway.		0.000025	2	2	IL1A,IL1R1
Pubmed	2406243	Tumor necrosis factor-alpha induction of novel gene products in human endothelial cells including a macrophage-specific chemotaxin.		0.000025	2	2	TNFAIP3,TNFAIP1
Pubmed	16619041	Specificities of protein-protein and protein-DNA interaction of GABP alpha and two newly defined ets-related proteins.		0.000025	2	2	TGFB1,IL1A
Pubmed	11963839	Expression of soluble adhesion molecules in sera of women with stage III and IV endometriosis.		0.000025	2	2	VCAM1,ICAM1
Pubmed	15194795	Receptor (CD155)-dependent endocytosis of poliovirus and retrograde axonal transport of the endosome.		0.000025	2	2	DYNLT1,PVR
Pubmed	17560459	Circulating levels of adhesion molecules in chronic kidney disease correlate with the stage of renal disease and with C-reactive protein.		0.000025	2	2	VCAM1,ICAM1
Pubmed	19212630	Hypoxia enhances CXCR4 expression by activating HIF-1 in oral squamous cell carcinoma.		0.000025	2	2	HIF1A,CXCR4
Pubmed	12714597	The P2Y2 nucleotide receptor mediates UTP-induced vascular cell adhesion molecule-1 expression in coronary artery endothelial cells.		0.000025	2	2	P2RY2,VCAM1
Pubmed	17088426	PGE(1) stimulation of HEK293 cells generates multiple contiguous domains with different [cAMP]: role of compartmentalized phosphodiesterases.		0.000025	2	2	PDE4D,PDE4B
Pubmed	19022587	The distinction between lesional and non-lesional skin in psoriasis vulgaris through expression of adhesion molecules ICAM-1 and VCAM-1.		0.000025	2	2	VCAM1,ICAM1
Pubmed	15560890	Pin1 flips Alzheimer's switch.		0.000025	2	2	SELE,ICAM1
Pubmed	17943642	Maternal serum soluble adhesion molecule levels at 11+0-13+6 weeks and subsequent development of pre-eclampsia.		0.000025	2	2	VCAM1,ICAM1
Pubmed	14722298	Enterovirus capsid interactions with decay-accelerating factor mediate lytic cell infection.		0.000025	2	2	CD55,ICAM1
Pubmed	17956423	A novel leptospiral protein increases ICAM-1 and E-selectin expression in human umbilical vein endothelial cells.		0.000025	2	2	SELE,ICAM1
Pubmed	12958610	Increased plasma levels of plasminogen activator inhibitor-1 and soluble vascular cell adhesion molecule after triacylglycerol infusion in man.		0.000025	2	2	SERPINE1,VCAM1
Pubmed	18504269	Baseline ICAM-1 and VCAM-1 are increased in initially healthy middle-aged men who develop cardiovascular disease during 6.6 years of follow-up.		0.000025	2	2	VCAM1,ICAM1
Pubmed	18761738	s-ICAM-1 and s-VCAM-1 in healthy men are strongly associated with traits of the metabolic syndrome, becoming evident in the postprandial response to a lipid-rich meal.		0.000025	2	2	VCAM1,ICAM1
Pubmed	16023325	Inverse relationship between the ratio of ICAM-1 expressing lymphocytes and serum TGF-beta 1 concentrations in acute rheumatic fever.		0.000025	2	2	TGFB1,ICAM1
Pubmed	19461049	JAM-C induces endothelial cell permeability through its association and regulation of {beta}3 integrins.		0.000025	2	2	JAM3,ITGB3
Pubmed	17395591	Structure-based mapping of DAF active site residues that accelerate the decay of C3 convertases.		0.000025	2	2	CD55,CFB
Pubmed	17657162	HMG-CoA reductase inhibitors reduce nicotine-induced expression of cellular adhesion molecules in cultured human coronary endothelial cells.		0.000025	2	2	VCAM1,ICAM1
Pubmed	16931622	The risk of dialysis access thrombosis is related to the transforming growth factor-beta1 production haplotype and is modified by polymorphisms in the plasminogen activator inhibitor-type 1 gene.		0.000025	2	2	TGFB1,SERPINE1
Pubmed	17962718	Expression of intercellular adhesion molecule-1 and vascular cell adhesion molecule-1 in human endometrial stromal and epithelial cells is regulated by interferon-gamma but not iron.		0.000025	2	2	VCAM1,ICAM1
Pubmed	14691297	Induction of intercellular adhesion molecule-1 on human brain endothelial cells by HIV-1 gp120: role of CD4 and chemokine coreceptors.		0.000025	2	2	VCAM1,ICAM1
Pubmed	8557254	DNA polymorphisms in adhesion molecule genes--a new risk factor for early atherosclerosis.		0.000025	2	2	SELE,ICAM1
Pubmed	15331359	Flow-conditioned HUVECs support clustered leukocyte adhesion by coexpressing ICAM-1 and E-selectin.		0.000025	2	2	SELE,ICAM1
Pubmed	16828081	Hypoxic induction of human visfatin gene is directly mediated by hypoxia-inducible factor-1.		0.000025	2	2	HIF1A,NAMPT
Pubmed	18562079	Interaction with human stromal cells enhances CXCR4 expression and engraftment of cord blood Lin(-)CD34(-) cells.		0.000025	2	2	CXCR4,CD34
Pubmed	17389327	Circulating levels of endothelial adhesion molecules and risk of diabetes in an ethnically diverse cohort of women.		0.000025	2	2	SELE,ICAM1
Pubmed	18574676	Renal expression of adhesion molecules in anca-associated disease.		0.000025	2	2	VCAM1,ICAM1
Pubmed	15466858	6-Phosphofructo-2-kinase (pfkfb3) gene promoter contains hypoxia-inducible factor-1 binding sites necessary for transactivation in response to hypoxia.		0.000025	2	2	HIF1A,PFKFB3
Pubmed	10602408	Human immunodeficiency virus type 1 TAT protein induces adhesion molecule expression in astrocytes.		0.000025	2	2	VCAM1,ICAM1
Pubmed	17564956	Serum soluble ICAM-1, VCAM-1, L-selectin, and P-selectin levels as markers of infection and their relation to clinical severity in neonatal sepsis.		0.000025	2	2	VCAM1,ICAM1
Pubmed	15344881	Signaling pathways of the F11 receptor (F11R; a.k.a. JAM-1, JAM-A) in human platelets: F11R dimerization, phosphorylation and complex formation with the integrin GPIIIa.		0.000025	2	2	ITGB3,F11R
Pubmed	19407978	Inhibitory effects of clotrimazole on TNF-alpha-induced adhesion molecule expression and angiogenesis.		0.000025	2	2	VCAM1,ICAM1
Pubmed	13679381	Age-related changes in the response of human articular cartilage to IL-1alpha and transforming growth factor-beta (TGF-beta): chondrocytes exhibit a diminished sensitivity to TGF-beta.		0.000025	2	2	TGFB1,IL1A
Pubmed	15059493	[Exploration of the levels and significance of serum s C5b-9, s VCAM-1, s ICZM-1 in children wit asthma]		0.000025	2	2	VCAM1,ICAM1
Pubmed	17221326	In vitro shear stress modulates antithrombogenic potentials of human endothelial progenitor cells.		0.000025	2	2	SERPINE1,PTGIS
Pubmed	16879223	The 4G/5G PAI-1 polymorphism influences the endothelial response to IL-1 and the modulatory effect of pravastatin.		0.000025	2	2	SERPINE1,IL1A
Pubmed	15593054	Circulating levels of soluble adhesion molecules in patients with ANCA-associated vasculitis.		0.000025	2	2	SELE,ICAM1
Pubmed	18025805	Vascular endothelial growth factor, hypoxia-inducible factor 1 alpha and CD34 expressions in early-stage gastric tumors: relationship with pathological factors and prognostic impact on survival.		0.000025	2	2	HIF1A,CD34
Pubmed	12716314	Plasminogen activator inhibitor type 1 (PAI1) and platelet glycoprotein IIIa (PGIIIa) polymorphisms in Black South Africans with pre-eclampsia.		0.000025	2	2	ITGB3,SERPINE1
Pubmed	15372625	Transforming growth factor beta stimulation of biglycan gene expression is potentially mediated by sp1 binding factors.		0.000025	2	2	TGFB1,BGN
Pubmed	10383378	The biology of the small leucine-rich proteoglycans. Functional network of interactive proteins.		0.000025	2	2	TGFB1,BGN
Pubmed	10690527	Epigenetic regulation of gene expression in cervical cancer cells by the tumor microenvironment.		0.000025	2	2	HIGD1A,C7orf68
Pubmed	17334226	Extracellular HIV-1 Tat enhances monocyte adhesion by up-regulation of ICAM-1 and VCAM-1 gene expression via ROS-dependent NF-kappaB activation in astrocytes.		0.000025	2	2	VCAM1,ICAM1
Pubmed	12771130	Alpha(v)beta3 integrin expression up-regulates cdc2, which modulates cell migration.		0.000025	2	2	ITGB3,CDC2
Pubmed	19238444	The genomic basis of cerebral palsy: a HuGE systematic literature review.		0.000025	4	34	THBD,ITGB3,SELE,SERPINE1
Pubmed	19117745	Cytokine gene polymorphisms and BALF cytokine levels in interstitial lung diseases.		0.000026	3	12	TGFB1,IL1A,IL1R1
Pubmed	18613029	NF-kappaB, but not p38 MAP kinase, is required for TNF-alpha-induced expression of cell adhesion molecules in endothelial cells.		0.000026	3	12	SELE,VCAM1,ICAM1
Pubmed	15170937	Association of single nucleotide polymorphisms within cytokine genes with juvenile idiopathic arthritis in the Czech population.		0.000026	3	12	TGFB1,IL1A,IL1R1
Pubmed	16100774	Cytokine gene polymorphisms in population of ethnic Macedonians.		0.000026	3	12	TGFB1,IL1A,IL1R1
Pubmed	18513389	New application of intelligent agents in sporadic amyotrophic lateral sclerosis identifies unexpected specific genetic background.		0.000028	4	35	ITGB3,SELE,SERPINE1,ICAM1
Pubmed	12164325	Genotype frequencies of 50 polymorphisms for 241 Japanese non-cancer patients.		0.000032	4	36	TGFB1,IL1A,IL1R1,CD36
Pubmed	17889143	Cytokine polymorphisms and risk of infection after kidney transplantation.		0.000034	3	13	TGFB1,IL1A,IL1R1
Pubmed	19594368	Distribution of cytokine gene polymorphisms in the general Lebanese population: the first report.		0.000034	3	13	TGFB1,IL1A,IL1R1
Pubmed	17627763	Single nucleotide polymorphisms of cytokine genes in the healthy Slovak population.		0.000034	3	13	TGFB1,IL1A,IL1R1
Pubmed	19332120	Effect of desensitization in solid organ transplant recipients depends on some cytokines genes polymorphism.		0.000034	3	13	TGFB1,IL1A,IL1R1
Pubmed	17257312	Frequency distribution of cytokine gene polymorphisms in the healthy North Indian population.		0.000034	3	13	TGFB1,IL1A,IL1R1
Pubmed	19470040	TNF-alpha and IL-10 gene polymorphisms show a weak association with pemphigus vulgaris in the Slovak population.		0.000034	3	13	TGFB1,IL1A,IL1R1
Pubmed	19408823	Distribution of the 22 cytokine gene polymorphisms in healthy Macedonian population.		0.000034	3	13	TGFB1,IL1A,IL1R1
Pubmed	16938461	Cytokine gene polymorphisms can alter the effect of Bacillus Calmette-Gu�rin (BCG) immunotherapy.		0.000034	3	13	TGFB1,IL1A,IL1R1
Pubmed	18632425	Cytokine single nucleotide polymorphisms in Iranian populations.		0.000034	3	13	TGFB1,IL1A,IL1R1
Pubmed	19336475	Integrated associations of genotypes with multiple blood biomarkers linked to coronary heart disease risk.		0.000041	5	76	TGFB1,CFB,IL1A,CXCR4,NDST1
Pubmed	19336370	Determination of genetic predisposition to patent ductus arteriosus in preterm infants.		0.000052	6	130	TGFB1,TNFAIP3,ITGB3,DHCR24,IL1A,PTGIS
Pubmed	19420105	A candidate gene approach to genetic prognostic factors of IgA nephropathy--a result of Polymorphism REsearch to DIstinguish genetic factors Contributing To progression of IgA Nephropathy (PREDICT-IgAN).		0.000056	5	81	TGFB1,THBD,SELE,SERPINE1,ICAM1
Pubmed	19240061	Coeliac disease-associated risk variants in TNFAIP3 and REL implicate altered NF-kappaB signalling.		0.000065	8	267	REL,TNFAIP3,HECA,TMEM120B,IL1A,CXCR4,PDE4B,ANTXR2
Pubmed	18987618	Screening for replication of genome-wide SNP associations in sporadic ALS.		0.000066	3	16	EXOC4,GALNT1,ARHGAP18
Pubmed	17100549	Genetic polymorphisms of TGF-beta, PAI-1, and COL1A-1, and determination of bone mineral density in Caucasian females.		0.000074	2	3	TGFB1,SERPINE1
Pubmed	17126824	Effects of selective LDL apheresis on plasma concentrations of ICAM-1, VCAM-1 and P-selectin in diabetic patients with arteriosclerosis obliterans and receiving maintenance hemodialysis.		0.000074	2	3	VCAM1,ICAM1
Pubmed	19439404	Specificity of binding of the low density lipoprotein receptor-related protein to different conformational states of the clade E serpins plasminogen activator inhibitor-1 and proteinase nexin-1.		0.000074	2	3	SERPINE1,SERPINE2
Pubmed	16773720	Expression of E-selectin, integrin beta1 and immunoglobulin superfamily member in human gastric carcinoma cells and its clinicopathologic significance.		0.000074	2	3	SELE,ICAM1
Pubmed	17143338	Hypoxic regulation of PFKFB-3 and PFKFB-4 gene expression in gastric and pancreatic cancer cell lines and expression of PFKFB genes in gastric cancers.		0.000074	2	3	HIF1A,PFKFB3
Pubmed	16756721	CXCR4 chemokine receptor mediates prostate tumor cell adhesion through alpha5 and beta3 integrins.		0.000074	2	3	ITGB3,CXCR4
Pubmed	14763917	Body weight and glucose metabolism have a different effect on circulating levels of ICAM-1, E-selectin, and endothelin-1 in humans.		0.000074	2	3	SELE,ICAM1
Pubmed	17721610	CREB binding to the hypoxia-inducible factor-1 responsive elements in the plasminogen activator inhibitor-1 promoter mediates the glucagon effect.		0.000074	2	3	SERPINE1,HIF1A
Pubmed	11956022	The combination of the interleukin-1alpha (IL-1alpha-889) genotype and the interleukin-10 (IL-10 ATA) haplotype is associated with increased interleukin-10 (IL-10) plasma levels in healthy individuals.		0.000074	2	3	IL1A,IL1R1
Pubmed	16820586	Inflammatory gene polymorphisms and risk of postoperative myocardial infarction after cardiac surgery.		0.000074	2	3	SELE,ICAM1
Pubmed	18381294	Involvement of hypoxia-inducing factor-1alpha-dependent plasminogen activator inhibitor-1 up-regulation in Cyr61/CCN1-induced gastric cancer cell invasion.		0.000074	2	3	SERPINE1,HIF1A
Pubmed	15548573	Targeting leukocyte integrins in human diseases.		0.000074	2	3	VCAM1,ICAM1
Pubmed	15175347	The P2Y2 nucleotide receptor mediates vascular cell adhesion molecule-1 expression through interaction with VEGF receptor-2 (KDR/Flk-1).		0.000074	2	3	P2RY2,VCAM1
Pubmed	15897668	Markers of endothelial cell activation/injury: CD146 and thrombomodulin are related to adiponectin in kidney allograft recipients.		0.000074	2	3	THBD,MCAM
Pubmed	12028539	Relationship of polymorphisms of the Interleukin-1 gene cluster to occurrence and severity of rheumatoid arthritis.		0.000074	2	3	IL1A,IL1R1
Pubmed	11642722	Thrombomodulin, calretinin and c-kit (CD117) expression in cardiac myxoma.		0.000074	2	3	KIT,THBD
Pubmed	19142800	Relations of TGF-beta1 with HIF-1 alpha, GLUT-1 and longer survival of colorectal cancer patients.		0.000074	2	3	TGFB1,HIF1A
Pubmed	16815840	Transforming growth factor beta1 induces hypoxia-inducible factor-1 stabilization through selective inhibition of PHD2 expression.		0.000074	2	3	TGFB1,HIF1A
Pubmed	18978303	Dynasore, a dynamin inhibitor, induces PAI-1 expression in MeT-5A human pleural mesothelial cells.		0.000074	2	3	TGFB1,SERPINE1
Pubmed	2946959	The cell surface receptors for interleukin-1 alpha and interleukin-1 beta are identical.		0.000074	2	3	IL1A,IL1R1
Pubmed	16916660	Polymorphism in L-selectin, E-selectin and ICAM-1 genes in Asian Indian pediatric patients with celiac disease.		0.000074	2	3	SELE,ICAM1
Pubmed	12750158	Signaling through JAM-1 and alphavbeta3 is required for the angiogenic action of bFGF: dissociation of the JAM-1 and alphavbeta3 complex.		0.000074	2	3	ITGB3,F11R
Pubmed	14714557	Increased E-selectin, IL-8 and IL-10 gene expression in human skin after minimal trauma.		0.000074	2	3	SELE,ICAM1
Pubmed	12890860	Interleukin 1alpha, interleukin 1beta and interleukin 1 receptor gene polymorphisms in psoriatic arthritis.		0.000074	2	3	IL1A,IL1R1
Pubmed	12752101	Interleukin-1 genotype and outcome of unrelated donor bone marrow transplantation.		0.000074	2	3	IL1A,IL1R1
Pubmed	11517385	Gp120 activates children's brain endothelial cells via CD4.		0.000074	2	3	VCAM1,ICAM1
Pubmed	11508575	Linkage and association analysis of candidate genes in rheumatoid arthritis.		0.000074	2	3	IL1R1,ICAM1
Pubmed	12212456	[Risk factors in adult periodontitis: polymorphism in the interleukin-1 gene family]		0.000074	2	3	IL1A,IL1R1
Pubmed	19132225	Rac-1 promotes pulmonary artery smooth muscle cell proliferation by upregulation of plasminogen activator inhibitor-1: role of NFkappaB-dependent hypoxia-inducible factor-1alpha transcription.		0.000074	2	3	SERPINE1,HIF1A
Pubmed	14734737	E-selectin, thymus- and activation-regulated chemokine/CCL17, and intercellular adhesion molecule-1 are constitutively coexpressed in dermal microvessels: a foundation for a cutaneous immunosurveillance system.		0.000074	2	3	SELE,ICAM1
Pubmed	19383239	Expression of CD34, alpha-smooth muscle actin and transforming growth factor-beta1 in squamous intraepithelial lesions and squamous cell carcinoma of the cervix.		0.000074	2	3	TGFB1,CD34
Pubmed	9184208	Recycling of the urokinase receptor upon internalization of the uPA:serpin complexes.		0.000074	2	3	SERPINE1,SERPINE2
Pubmed	18616803	Tumor marker utility and prognostic relevance of cathepsin B, cathepsin L, urokinase-type plasminogen activator, plasminogen activator inhibitor type-1, CEA and CA 19-9 in colorectal cancer.		0.000074	2	3	SERPINE1,CTSB
Pubmed	18624935	Immunohistochemical analysis of interleukin-1 alpha, its type I receptor and antagonist in keratocystic odontogenic tumors.		0.000074	2	3	IL1A,IL1R1
Pubmed	11790645	Interleukin-1 gene cluster polymorphisms in sarcoidosis and idiopathic pulmonary fibrosis.		0.000074	2	3	IL1A,IL1R1
Pubmed	15935832	Transforming growth factor beta-1 released from platelets contributes to hypercoagulability in veno-occlusive disease following hematopoetic stem cell transplantation.		0.000074	2	3	TGFB1,SERPINE1
Pubmed	19421145	PLZF-mediated control on c-kit expression in CD34(+) cells and early erythropoiesis.		0.000074	2	3	KIT,CD34
Pubmed	17531998	Endothelial and leukocyte adhesion molecules in primary hypertriglyceridemia.		0.000074	2	3	VCAM1,ICAM1
Pubmed	12027924	Intercellular adhesion molecule-1 (ICAM-1) polymorphism is associated with diabetic retinopathy in Type 2 diabetes mellitus.		0.000074	2	3	SELE,ICAM1
Pubmed	17710630	Differential roles of CD36, ICAM-1, and P-selectin in Plasmodium falciparum cytoadherence in vivo.		0.000074	2	3	CD36,ICAM1
Pubmed	17822725	Expression of junctional adhesion molecules on the human lymphatic endothelium.		0.000074	2	3	JAM3,F11R
Pubmed	2227411	Human cDNAs encoding homologs of the small p34Cdc28/Cdc2-associated protein of Saccharomyces cerevisiae and Schizosaccharomyces pombe.		0.000074	2	3	CKS1B,CDC2
Pubmed	11922919	Elevated soluble CD40 ligand is related to the endothelial adhesion molecules in patients with acute coronary syndrome.		0.000074	2	3	VCAM1,ICAM1
Pubmed	16426244	Association between ICAM-1 Gly-Arg polymorphism and renal parenchymal scarring following childhood urinary tract infection.		0.000074	2	3	SELE,ICAM1
Pubmed	16423881	Role of steroid receptor coactivators in glucocorticoid and transforming growth factor beta regulation of plasminogen activator inhibitor gene expression.		0.000074	2	3	TGFB1,SERPINE1
Pubmed	19422386	The carbon monoxide releasing molecule (CORM-3) inhibits expression of vascular cell adhesion molecule-1 and E-selectin independently of haem oxygenase-1 expression.		0.000074	2	3	SELE,VCAM1
Pubmed	17192354	Serum interleukin-18 levels are increased and closely associated with various soluble adhesion molecule levels in type 1 diabetic patients.		0.000074	2	3	VCAM1,ICAM1
Pubmed	18484695	Clinical significance of selected endothelial activation markers in patients with systemic lupus erythematosus.		0.000074	2	3	THBD,SELE
Pubmed	17292586	TNFR1-induced NF-kappaB, but not ERK, p38MAPK or JNK activation, mediates TNF-induced ICAM-1 and VCAM-1 expression on endothelial cells.		0.000074	2	3	VCAM1,ICAM1
Pubmed	19055786	Variations in host genes encoding adhesion molecules and susceptibility to falciparum malaria in India.		0.000074	2	3	CD36,ICAM1
Pubmed	18024394	Association of transforming growth factor-beta1 gene polymorphism in the development of Epstein-Barr virus-related hematologic diseases.		0.000074	2	3	TGFB1,IL1A
Pubmed	18797412	Fibrogenic polymorphisms (TGF-beta, PAI-1, AT) in Mexican patients with established liver fibrosis. Potential correlation with pirfenidone treatment.		0.000074	2	3	TGFB1,SERPINE1
Pubmed	19407977	Resveratrol inhibits Porphyromonas gingivalis lipopolysaccharide-induced endothelial adhesion molecule expression by suppressing NF-kappaB activation.		0.000074	2	3	VCAM1,ICAM1
Pubmed	16756955	Lower expression of CXCR4 in lymph node metastases than in primary breast cancers: potential regulation by ligand-dependent degradation and HIF-1alpha.		0.000074	2	3	HIF1A,CXCR4
Pubmed	16969099	The role of N-cadherin, MCAM and beta3 integrin in melanoma progression, proliferation, migration and invasion.		0.000074	2	3	ITGB3,MCAM
Pubmed	15546867	Transforming growth factor-beta (TGF-beta) type I receptor/ALK5-dependent activation of the GADD45beta gene mediates the induction of biglycan expression by TGF-beta.		0.000074	2	3	BGN,GADD45B
Pubmed	19336886	CXCL12-mediated induction of plasminogen activator inhibitor-1 expression in human CXCR4 positive astroglioma cells.		0.000074	2	3	SERPINE1,CXCR4
Pubmed	19136145	Does colorectal cancer clinical advancement affect adhesion molecules (sP-selectin, sE-selectin and ICAM-1) concentration?		0.000074	2	3	SELE,ICAM1
Pubmed	15187087	alpha(v)beta(3) Integrin interacts with the transforming growth factor beta (TGFbeta) type II receptor to potentiate the proliferative effects of TGFbeta1 in living human lung fibroblasts.		0.000074	2	3	TGFB1,ITGB3
Pubmed	12709053	A steady-state competition model describes the modulating effects of thrombomodulin on thrombin inhibition by plasminogen activator inhibitor-1 in the absence and presence of vitronectin.		0.000074	2	3	THBD,SERPINE1
Pubmed	11864708	Decrease of fibrinolytic activity in human endothelial cells by arsenite.		0.000074	2	3	THBD,SERPINE1
Pubmed	19258923	Genetic susceptibility to respiratory syncytial virus bronchiolitis in preterm children is associated with airway remodeling genes and innate immune genes.		0.000086	7	206	TGFB1,CXCL16,VCAM1,IL1A,IL1R1,IFNGR2,ICAM1
Pubmed	17703412	Genetic susceptibility to respiratory syncytial virus bronchiolitis is predominantly associated with innate immune genes.		0.000089	7	207	TGFB1,CXCL16,VCAM1,IL1A,IL1R1,IFNGR2,ICAM1
Pubmed	17702963	An interactive association of common sequence variants in the neuropeptide Y gene with susceptibility to ischemic stroke.		0.000095	3	18	THBD,SERPINE1,VCAM1
Pubmed	17373700	Association studies of 23 positional/functional candidate genes on chromosome 10 in late-onset Alzheimer's disease.		0.000113	3	19	SNCG,CH25H,CDC2
Pubmed	19625176	PTEN identified as important risk factor of chronic obstructive pulmonary disease.		0.000128	9	376	TGFB1,SEPP1,ABCC4,SLC23A2,VCAM1,IL1A,IFNGR2,MEST,ICAM1
Pubmed	18656701	Tumor necrosis factor-alpha up-regulates the expression of CCL2 and adhesion molecules of human proximal tubular epithelial cells through MAPK signaling pathways.		0.000148	2	4	VCAM1,ICAM1
Pubmed	17056591	The Galpha13-Rho signaling axis is required for SDF-1-induced migration through CXCR4.		0.000148	2	4	RHOD,CXCR4
Pubmed	18085638	Prognostic value of immunophenotyping in elderly patients with acute myeloid leukemia: a single-institution experience.		0.000148	2	4	ANPEP,CD34
Pubmed	11929779	Human mast cell progenitors use alpha4-integrin, VCAM-1, and PSGL-1 E-selectin for adhesive interactions with human vascular endothelium under flow conditions.		0.000148	2	4	SELE,VCAM1
Pubmed	18827892	CD36 is significantly correlated with adipophilin in human carotid lesions and inversely correlated with plasma ApoAI.		0.000148	2	4	PLIN2,CD36
Pubmed	11839681	Inhibition of PDE3B augments PDE4 inhibitor-induced apoptosis in a subset of patients with chronic lymphocytic leukemia.		0.000148	2	4	PDE4D,PDE4B
Pubmed	12700666	Distortion of autocrine transforming growth factor beta signal accelerates malignant potential by enhancing cell growth as well as PAI-1 and VEGF production in human hepatocellular carcinoma cells.		0.000148	2	4	TGFB1,SERPINE1
Pubmed	15194470	Estrogen-mediated protection against HIV Tat protein-induced inflammatory pathways in human vascular endothelial cells.		0.000148	2	4	SELE,VCAM1
Pubmed	9030196	RAB GTPases expressed in human melanoma cells.		0.000148	2	4	RAB6B,RAB8B
Pubmed	7523444	Exogenous tat protein activates central nervous system-derived endothelial cells.		0.000148	2	4	SELE,SERPINE1
Pubmed	17891599	Relationship between estrogen receptor-alpha polymorphism and serum levels of vascular cell adhesion molecule-1, intercellular adhesion molecule-1, C-reactive protein and homocysteine in postmenopausal women.		0.000148	2	4	VCAM1,ICAM1
Pubmed	19290009	Variants of the interleukin-1 receptor antagonist gene are associated with fat mass in men.		0.000148	2	4	IL1A,IL1R1
Pubmed	19724277	BRCA1 tumours correlate with a HIF-1alpha phenotype and have a poor prognosis through modulation of hydroxylase enzyme profile expression.		0.000148	2	4	HIF1A,EGLN3
Pubmed	17877759	Phospholipid transfer protein activity is determined by type 2 diabetes mellitus and metabolic syndrome, and is positively associated with serum transaminases.		0.000148	2	4	GOT1,PLTP
Pubmed	7878046	Soluble type II interleukin 1 (IL-1) receptor binds and blocks processing of IL-1 beta precursor and loses affinity for IL-1 receptor antagonist.		0.000148	2	4	IL1A,IL1R1
Pubmed	11776328	Differential mechanisms of plasminogen activator inhibitor-1 gene activation by transforming growth factor-beta and tumor necrosis factor-alpha in endothelial cells.		0.000148	2	4	TGFB1,SERPINE1
Pubmed	11751937	Interaction of the poliovirus receptor CD155 with the dynein light chain Tctex-1 and its implication for poliovirus pathogenesis.		0.000148	2	4	DYNLT1,PVR
Pubmed	9525956	Identification of in vitro phosphorylation sites in the growth cone protein SCG10. Effect Of phosphorylation site mutants on microtubule-destabilizing activity.		0.000148	2	4	STMN2,CDC2
Pubmed	15370542	Evaluation of the ARMD1 locus on 1q25-31 in patients with age-related maculopathy: genetic variation in laminin genes and in exon 104 of HEMICENTIN-1.		0.000148	2	4	HMCN1,LAMC1
Pubmed	15190266	Extended haplotypes and linkage disequilibrium in the IL1R1-IL1A-IL1B-IL1RN gene cluster: association with knee osteoarthritis.		0.000148	2	4	IL1A,IL1R1
Pubmed	11598268	A conserved family of prolyl-4-hydroxylases that modify HIF.		0.000148	2	4	HIF1A,EGLN3
Pubmed	18284603	Human urotensin II induces tissue factor and cellular adhesion molecules expression in human coronary endothelial cells: an emerging role for urotensin II in cardiovascular disease.		0.000148	2	4	VCAM1,ICAM1
Pubmed	8413254	A family of human phosphodiesterases homologous to the dunce learning and memory gene product of Drosophila melanogaster are potential targets for antidepressant drugs.		0.000148	2	4	PDE4D,PDE4B
Pubmed	19212205	Polymorphism in ICAM-1, PECAM-1, E-selectin, and L-selectin genes in Tunisian patients with inflammatory bowel disease.		0.000148	2	4	SELE,ICAM1
Pubmed	17584583	Interleukin-1 gene complex polymorphisms in systemic sclerosis patients with severe restrictive lung physiology.		0.000148	2	4	IL1A,IL1R1
Pubmed	19088500	Downmodulatory effects of the antihistaminic drug bepotastine on cytokine/chemokine production and CD54 expression in human keratinocytes.		0.000148	2	4	IL1A,ICAM1
Pubmed	15784173	Genomic rearrangements on VCAM1, SELE, APEG1and AIF1 loci in atherosclerosis.		0.000148	2	4	SELE,VCAM1
Pubmed	15797878	Interleukin-1 gene cluster polymorphisms and alcoholism in Spanish men.		0.000148	2	4	IL1A,IL1R1
Pubmed	19702713	Graves' ophthalmopathy and gene polymorphisms in interleukin-1alpha, interleukin-1beta, interleukin-1 receptor and interleukin-1 receptor antagonist.		0.000148	2	4	IL1A,IL1R1
Pubmed	14741380	RORalpha1 and RORalpha4 suppress TNF-alpha-induced VCAM-1 and ICAM-1 expression in human endothelial cells.		0.000148	2	4	VCAM1,ICAM1
Pubmed	11427627	Polymorphism of the cytokine genes in hospitalized patients with Puumala hantavirus infection.		0.000148	2	4	IL1A,IL1R1
Pubmed	17116732	An inflammation-induced mechanism for leukocyte transmigration across lymphatic vessel endothelium.		0.000148	2	4	VCAM1,ICAM1
Pubmed	19353432	Increased expression of cell adhesion molecules in inflammatory myopathies: diagnostic utility and pathogenetic insights.		0.000148	2	4	VCAM1,ICAM1
Pubmed	17497038	Evaluation of C-reactive protein, endothelin-1, adhesion molecule(s), and lipids as inflammatory markers in type 2 diabetes mellitus patients.		0.000148	2	4	VCAM1,ICAM1
Pubmed	17954174	Adhesion molecule polymorphisms in acute renal allograft rejection.		0.000148	2	4	SELE,ICAM1
Pubmed	14735144	Functional correlates of the interleukin-1 receptor antagonist gene polymorphism in the colonic mucosa in ulcerative colitis.		0.000148	2	4	IL1A,IL1R1
Pubmed	17677000	Combined effects of thrombosis pathway gene variants predict cardiovascular events.		0.000148	2	4	THBD,ICAM1
Pubmed	17083033	Exhaustive genotyping of the interleukin-1 family genes and associations with AIDS progression in a French cohort.		0.000148	2	4	IL1A,IL1R1
Pubmed	17011204	Role of the transcription factor E2F1 in CXCR4-mediated neurotoxicity and HIV neuropathology.		0.000148	2	4	CXCR4,CDC2
Pubmed	14550782	HIV-1 Tat protein upregulates inflammatory mediators and induces monocyte invasion into the brain.		0.000148	2	4	VCAM1,ICAM1
Pubmed	16043164	Contemporaneous carrier-state of two or three "proatherosclerotic" variants of APOE, ICAM1, PPARA and PAI-1 genes differentiate CAD patients from healthy individuals.		0.000148	2	4	SERPINE1,ICAM1
Pubmed	11959660	Del1 mediates VSMC adhesion, migration, and proliferation through interaction with integrin alpha(v)beta(3).		0.000148	2	4	ITGB3,EDIL3
Pubmed	17057786	Analysis of Hemicentin-1, hOgg1, and E-selectin single nucleotide polymorphisms in age-related macular degeneration.		0.000148	2	4	SELE,HMCN1
Pubmed	16552335	Proliferating cell nuclear antigen, survivin, and CD34 expressions in pancreatic cancer and their correlation with hypoxia-inducible factor 1alpha.		0.000148	2	4	HIF1A,CD34
Pubmed	19431193	IL1B polymorphisms modulate cystic fibrosis lung disease.		0.000148	2	4	IL1A,IL1R1
Pubmed	18484169	IL1 gene cluster polymorphisms and its haplotypes may predict the risk to develop invasive pulmonary aspergillosis and modulate C-reactive protein level.		0.000148	2	4	IL1A,IL1R1
Pubmed	12859287	Prothrombotic gene polymorphisms and atherothrombotic cerebral infarction.		0.000148	2	4	SERPINE1,SERPINE2
Pubmed	12670503	Differential regulation of HIF-1 alpha prolyl-4-hydroxylase genes by hypoxia in human cardiovascular cells.		0.000148	2	4	HIF1A,EGLN3
Pubmed	16317091	Migration inhibitory factor up-regulates vascular cell adhesion molecule-1 and intercellular adhesion molecule-1 via Src, PI3 kinase, and NFkappaB.		0.000148	2	4	VCAM1,ICAM1
Pubmed	9126608	Purification, characterization, and in vitro phosphorylation of the neuron-specific membrane-associated protein SCG10.		0.000148	2	4	STMN2,CDC2
Pubmed	16830365	Clinicopathological and immunohistochemical analysis of gastrointestinal stromal tumor.		0.000148	2	4	KIT,CD34
Pubmed	18991188	Clinical significance of nailfold capillaroscopy in systemic lupus erythematosus: correlation with endothelial cell activation markers and disease activity.		0.000148	2	4	THBD,SELE
Pubmed	18760838	S1P(1) overexpression stimulates S1P-dependent chemotaxis of human CD34+ hematopoietic progenitor cells but strongly inhibits SDF-1/CXCR4-dependent migration and in vivo homing.		0.000148	2	4	CXCR4,CD34
Pubmed	9371714	Molecular cloning and transient expression in COS7 cells of a novel human PDE4B cAMP-specific phosphodiesterase, HSPDE4B3.		0.000148	2	4	PDE4D,PDE4B
Pubmed	18977990	Candidate genes and cerebral palsy: a population-based study.		0.000153	3	21	THBD,SERPINE1,PDE4D
Pubmed	18676870	Variants in inflammation genes and the risk of biliary tract cancers and stones: a population-based study in China.		0.000177	3	22	TGFB1,VCAM1,IL1A
Pubmed	12897139	BMPER, a novel endothelial cell precursor-derived protein, antagonizes bone morphogenetic protein signaling and endothelial cell differentiation.		0.000246	2	5	BMP6,BMPER
Pubmed	19670701	Expression of selected adhesion molecules in dermatitis herpetiformis and bullous pemphigoid.		0.000246	2	5	ITGB3,SELE
Pubmed	16353042	[Associations of hemostasis factors genes with early development of ischemic heart disease and manifestation of myocardial infarction in young age]		0.000246	2	5	ITGB3,SERPINE1
Pubmed	18627514	Influence of cytokine and intercellular adhesion molecule-1 gene polymorphisms on acute rejection in pediatric renal transplantation.		0.000246	2	5	TGFB1,ICAM1
Pubmed	19076825	Proinflammatory cytokine gene single nucleotide polymorphisms in common variable immunodeficiency.		0.000246	2	5	IL1A,IL1R1
Pubmed	11849463	Polymorphism of the cytokine genes and IgA nephropathy.		0.000246	2	5	TNFAIP1,IL1R1
Pubmed	19005416	Complement gene expression in human cardiac allograft biopsies as a correlate of histologic grade of injury.		0.000246	2	5	CFB,C3AR1
Pubmed	11331301	An RGD sequence in the P2Y(2) receptor interacts with alpha(V)beta(3) integrins and is required for G(o)-mediated signal transduction.		0.000246	2	5	ITGB3,P2RY2
Pubmed	14644395	IL-1 cluster genes and occurrence of post-percutaneous transluminal coronary angioplasty restenosis: a prospective, angiography-based evaluation.		0.000246	2	5	IL1A,IL1R1
Pubmed	16885196	Polymorphisms in Th1-type cell-mediated response genes and risk of gastric cancer.		0.000246	2	5	IL1A,IFNGR2
Pubmed	16030091	The role of cytokine gene polymorphisms in colorectal cancer and their interaction with aspirin use in the northeast of Scotland.		0.000246	2	5	TGFB1,IL1A
Pubmed	18550614	Polymorphic variation in surfactant protein B is associated with COPD exacerbations.		0.000246	2	5	TGFB1,SERPINE2
Pubmed	17008592	Phenotype and genotype of Dent's disease in three Korean boys.		0.000246	2	5	VCAM1,ICAM1
Pubmed	15721254	OS-9 interacts with hypoxia-inducible factor 1alpha and prolyl hydroxylases to promote oxygen-dependent degradation of HIF-1alpha.		0.000246	2	5	HIF1A,EGLN3
Pubmed	14669168	Polycystic ovary syndrome, the G1691A factor V Leiden mutation, and plasminogen activator inhibitor activity: associations with recurrent pregnancy loss.		0.000246	2	5	ITGB3,SERPINE1
Pubmed	9736741	HIV type I envelope determinants for use of the CCR2b, CCR3, STRL33, and APJ coreceptors.		0.000246	2	5	APLNR,CXCR4
Pubmed	15156561	Regulation of HIF prolyl hydroxylases by hypoxia-inducible factors.		0.000246	2	5	HIF1A,EGLN3
Pubmed	15716278	Smad6s regulates plasminogen activator inhibitor-1 through a protein kinase C-beta-dependent up-regulation of transforming growth factor-beta.		0.000246	2	5	TGFB1,SERPINE1
Pubmed	17320454	Population genetic data on four STR loci, PAI (CA)n, GpIIIa (CT)n, PLAT (TG)14 (CA)12, and NOS2A (CCTTT)n, in Mediterranean populations.		0.000246	2	5	ITGB3,SERPINE1
Pubmed	12208882	The junctional adhesion molecule 3 (JAM-3) on human platelets is a counterreceptor for the leukocyte integrin Mac-1.		0.000246	2	5	JAM3,ICAM1
Pubmed	17220333	A case-control investigation of immune function gene polymorphisms and risk of testicular germ cell tumors.		0.000246	2	5	TGFB1,IFNGR2
Pubmed	15247232	Differential function of the prolyl hydroxylases PHD1, PHD2, and PHD3 in the regulation of hypoxia-inducible factor.		0.000246	2	5	HIF1A,EGLN3
Pubmed	18322311	IL-1, IL-1R and TNFalpha gene polymorphisms in Iranian patients with multiple sclerosis.		0.000246	2	5	IL1A,IL1R1
Pubmed	19473963	Nuclear targeting of 6-phosphofructo-2-kinase (PFKFB3) increases proliferation via cyclin-dependent kinases.		0.000246	2	5	PFKFB3,CDC2
Pubmed	12097820	Both ICAM-1- and VCAM-1-integrin interactions are important in mediating monocyte adhesion to human saphenous vein.		0.000246	2	5	VCAM1,ICAM1
Pubmed	15494412	Vascular endothelial cell growth factor attenuates actions of transforming growth factor-beta in human endothelial cells.		0.000246	2	5	TGFB1,SERPINE1
Pubmed	17515951	Expression of selected integrins and selectins in bullous pemphigoid.		0.000246	2	5	ITGB3,SELE
Pubmed	18160589	Ocular vascular thrombotic events: central retinal vein and central retinal artery occlusions.		0.000246	2	5	ITGB3,SERPINE1
Pubmed	14963283	Absence of association between polymorphisms in the hemostatic factor pathway genes and carotid intimal medial thickness: the Framingham Heart Study.		0.000246	2	5	ITGB3,SERPINE1
Pubmed	18685811	Analysis of inherited thrombophilic mutations and natural anticoagulant deficiency in patients with idiopathic portal hypertension.		0.000246	2	5	ITGB3,SERPINE1
Pubmed	18757300	A cross-talk between stromal cell-derived factor-1 and transforming growth factor-beta controls the quiescence/cycling switch of CD34(+) progenitors through FoxO3 and mammalian target of rapamycin.		0.000246	2	5	TGFB1,CD34
Pubmed	19684156	Association between interleukin 1 gene cluster polymorphisms and bilateral distal interphalangeal osteoarthritis.		0.000246	2	5	IL1A,IL1R1
Pubmed	19017876	Genetic associations with hypoxemia and pulmonary arterial pressure in COPD.		0.000246	2	5	TGFB1,SERPINE2
Pubmed	19123042	Impact of hemostatic gene single point mutations in patients with non-diabetic coronary artery disease.		0.000246	2	5	ITGB3,SERPINE1
Pubmed	19505916	Cytokine and cytokine receptor single-nucleotide polymorphisms predict risk for non-small cell lung cancer among women.		0.000294	3	26	TGFB1,IL1A,IFNGR2
Pubmed	10391209	Characterization of single-nucleotide polymorphisms in coding regions of human genes.		0.000364	4	67	ITGB3,SERPINE1,ANXA3,CD36
Pubmed	19356953	Elevated tissue expression of thrombomodulatory factors correlates with acute symptomatic carotid plaque phenotype.		0.000368	2	6	THBD,SERPINE1
Pubmed	17230042	Mutations and polymorphisms in genes affecting haemostasis components in children with thromboembolic events.		0.000368	2	6	ITGB3,SERPINE1
Pubmed	11238109	CD36 associates with CD9 and integrins on human blood platelets.		0.000368	2	6	ITGB3,CD36
Pubmed	17446174	Necl-5/poliovirus receptor interacts in cis with integrin alphaVbeta3 and regulates its clustering and focal complex formation.		0.000368	2	6	ITGB3,PVR
Pubmed	8093006	Interaction of the small interstitial proteoglycans biglycan, decorin and fibromodulin with transforming growth factor beta.		0.000368	2	6	TGFB1,BGN
Pubmed	18321309	Association of interleukin-1 receptor antagonist +2018 gene polymorphism with Japanese chronic periodontitis patients using a novel genotyping method.		0.000368	2	6	TGFB1,IL1A
Pubmed	18158110	Inflammatory system gene polymorphism and the risk of stroke: a case-control study in an Indian population.		0.000368	2	6	IL1A,PDE4D
Pubmed	19111454	Genetic association analysis of COPD candidate genes with bronchodilator responsiveness.		0.000368	2	6	TGFB1,SERPINE2
Pubmed	11928807	Growth factor-dependent proliferation and invasion of muscle satellite cells require the cell-associated fibrinolytic system.		0.000368	2	6	TGFB1,SERPINE1
Pubmed	18763028	Proinflammatory Cytokine Gene Polymorphisms among Iranian Patients with Asthma.		0.000368	2	6	IL1A,IL1R1
Pubmed	12953056	The junctional adhesion molecule (JAM) family members JAM-2 and JAM-3 associate with the cell polarity protein PAR-3: a possible role for JAMs in endothelial cell polarity.		0.000368	2	6	JAM3,F11R
Pubmed	18702109	Association of cytokine gene polymorphisms in CWP and its severity in Turkish coal workers.		0.000368	2	6	TGFB1,IL1A
Pubmed	17517105	Effect of tecastemizole on pulmonary and cutaneous allergic inflammatory responses.		0.000368	2	6	VCAM1,ICAM1
Pubmed	19071013	Do BRCA1 modifiers also affect the risk of breast cancer in non-carriers?		0.000368	2	6	TGFB1,ITGB3
Pubmed	9653051	Structural interactions between chemokine receptors, gp120 Env and CD4.		0.000368	2	6	APLNR,CXCR4
Pubmed	12810109	Leukocyte-endothelial-cell interactions in leukocyte transmigration and the inflammatory response.		0.000368	2	6	JAM3,F11R
Pubmed	12518110	Spectrum and prevalence of prothrombotic single nucleotide polymorphism profiles in the Greek Cypriot population.		0.000368	2	6	ITGB3,SERPINE1
Pubmed	12082081	Dynamic interaction of VCAM-1 and ICAM-1 with moesin and ezrin in a novel endothelial docking structure for adherent leukocytes.		0.000368	2	6	VCAM1,ICAM1
Pubmed	16230423	Polymorphisms in cytokine and cellular adhesion molecule genes and susceptibility to hematotoxicity among workers exposed to benzene.		0.000368	2	6	VCAM1,IL1A
Pubmed	18157711	Association between inflammatory gene polymorphisms and coronary artery disease in an Indian population.		0.000368	2	6	IL1A,PDE4D
Pubmed	18803625	Comparison of thrombophilic gene mutations among patients experiencing recurrent miscarriage and deep vein thrombosis.		0.000368	2	6	ITGB3,SERPINE1
Pubmed	15351436	Influence of polymorphisms in the genes for cytokines and glutathione S-transferase omega on sporadic Alzheimer's disease.		0.000368	2	6	TGFB1,IL1A
Pubmed	17934860	Mcp-1, eNOS, tPA and PAI-1 gene polymorphism and correlation of genotypes and phenotypes in hepatopulmonary syndrome.		0.000368	2	6	SERPINE1,SERPINE2
Pubmed	19344414	Risk of non-Hodgkin lymphoma in association with germline variation in complement genes.		0.000499	3	31	CD55,CFB,C3AR1
Pubmed	19548631	Differential gene expression profiles of lung epithelial cells exposed to Burkholderia pseudomallei and Burkholderia thailandensis during the initial phase of infection.		0.000514	2	7	SELE,ICAM1
Pubmed	16184405	Interaction between inflammation-related gene polymorphisms and cigarette smoking on the risk of myocardial infarction in the Physician's Health Study.		0.000514	2	7	VCAM1,ICAM1
Pubmed	15854776	CD14 receptor polymorphism and Alzheimer's disease risk.		0.000514	2	7	IL1A,ICAM1
Pubmed	19395327	Early pregnancy loss in celiac women: The role of genetic markers of thrombophilia.		0.000514	2	7	ITGB3,SERPINE1
Pubmed	15917409	Influence of cytokine and ICAM-1 gene polymorphisms on susceptibility to chronic pancreatitis.		0.000514	2	7	TGFB1,ICAM1
Pubmed	15599946	The expression and regulation of ADAMTS-1, -4, -5, -9, and -15, and TIMP-3 by TGFbeta1 in prostate cells: relevance to the accumulation of versican.		0.000514	2	7	TGFB1,ADAMTS9
Pubmed	16635210	Multiple thrombophilic gene mutations rather than specific gene mutations are risk factors for recurrent miscarriage.		0.000514	2	7	ITGB3,SERPINE1
Pubmed	19018779	Apolipoprotein E and paraoxonase 1 polymorphisms are associated with lower serum thyroid hormones in postmenopausal women.		0.000514	2	7	ITGB3,SERPINE1
Pubmed	18930220	Thrombophilic gene polymorphisms are risk factors for unexplained infertility.		0.000514	2	7	ITGB3,SERPINE1
Pubmed	17656680	Plasminogen activation induced pericellular fibronectin proteolysis promotes fibroblast apoptosis.		0.000514	2	7	TGFB1,SERPINE1
Pubmed	17369174	[The genetic polymorphism of cytokine genes in Zhejiang Han individuals]		0.000514	2	7	TGFB1,IL1A
Pubmed	16567932	Mutations and polymorphisms in genes affecting hemostasis proteins and homocysteine metabolism in children with arterial ischemic stroke.		0.000514	2	7	ITGB3,SERPINE1
Pubmed	7818827	HIV-1 Tat induces cytokine synthesis by uninfected mononuclear cells.		0.000514	2	7	IL1A,IL1R1
Pubmed	10973963	Identification of a functional domain in a GADD45-mediated G2/M checkpoint.		0.000514	2	7	GADD45B,CDC2
Pubmed	19564823	Influence of genetic polymorphisms in oxidative stress related genes and smoking on plasma MDA-LDL, soluble CD40 ligand, E-selectin and soluble ICAM1 levels in patients with coronary artery disease.		0.000514	2	7	SELE,ICAM1
Pubmed	15308783	Proinflammatory genetic profiles in subjects with history of ischemic stroke.		0.000514	2	7	SELE,ICAM1
Pubmed	18665040	CYP A-204C polymorphism is associated with subclinical atherosclerosis in postmenopausal women.		0.000514	2	7	ITGB3,SERPINE1
Pubmed	12358597	The integrin alphavbeta3 is a receptor for the latency-associated peptides of transforming growth factors beta1 and beta3.		0.000514	2	7	TGFB1,ITGB3
Pubmed	19056482	Association of a polymorphism of the apolipoprotein E gene with chronic kidney disease in Japanese individuals with metabolic syndrome.		0.00068	4	79	SELE,SERPINE1,PTGIS,PDE4D
Pubmed	9792375	Purified Tat induces inflammatory response genes in Kaposi's sarcoma cells.		0.000683	2	8	VCAM1,ICAM1
Pubmed	12218052	Protein-disulfide isomerase-mediated reduction of two disulfide bonds of HIV envelope glycoprotein 120 occurs post-CXCR4 binding and is required for fusion.		0.000683	2	8	PDIA5,CXCR4
Pubmed	12095061	Interleukin 1 and chronic rejection: possible genetic links in human heart allografts.		0.000683	2	8	TGFB1,IL1R1
Pubmed	19554506	Expression of eight genes of nuclear factor-kappa B pathway in multiple myeloma using bone marrow aspirates obtained at diagnosis.		0.000683	2	8	VCAM1,ICAM1
Pubmed	12420205	Polymorphisms of transforming growth factor-beta1 and transforming growth factor-beta1 type II receptor genes are associated with acute graft-versus-host disease in children with HLA-matched sibling bone marrow transplantation.		0.000683	2	8	TGFB1,IFNGR2
Pubmed	18347341	PHDs overactivation during chronic hypoxia "desensitizes" HIFalpha and protects cells from necrosis.		0.000683	2	8	HIF1A,EGLN3
Pubmed	18728123	Methylenetetrahydrofolate reductase C677T polymorphism is associated with central adiposity and increased androgenicity in healthy postmenopausal women.		0.000683	2	8	ITGB3,SERPINE1
Pubmed	11796824	Molecular interactions and functional interference between vitronectin and transforming growth factor-beta.		0.000683	2	8	TGFB1,SERPINE1
Pubmed	17036337	Risks of human limb deficiency anomalies associated with 29 SNPs of genes involved in homocysteine metabolism, coagulation, cell-cell interactions, inflammatory response, and blood pressure regulation.		0.000683	2	8	SELE,SERPINE1
Pubmed	15811349	PICK-1: a scaffold protein that interacts with Nectins and JAMs at cell junctions.		0.000875	2	9	JAM3,F11R
Pubmed	15592292	Interleukins-1, -4, -6, -10, tumor necrosis factor, transforming growth factor-beta, FAS, and mannose-binding protein C gene polymorphisms in Australian women: Risk of preterm birth.		0.000875	2	9	TGFB1,IL1A
Pubmed	15900300	Analysis of differential gene expression in human melanocytic tumour lesions by custom made oligonucleotide arrays.		0.000875	2	9	THBD,FABP7
Pubmed	16573560	Th1/Th2 cytokine gene polymorphisms in patients with idiopathic pulmonary fibrosis.		0.000875	2	9	IL1A,IL1R1
Pubmed	18674955	Gene polymorphisms related to angiogenesis, inflammation and thrombosis that influence risk for oral cancer.		0.000875	2	9	ITGB3,SERPINE1
Pubmed	16511565	Metastasis-associated protein 1 enhances stability of hypoxia-inducible factor-1alpha protein by recruiting histone deacetylase 1.		0.000875	2	9	HIF1A,EGLN3
Pubmed	12558814	Genotyping for cytokine polymorphisms: allele frequencies in the Italian population.		0.000875	2	9	IL1A,IL1R1
Pubmed	16263699	Elucidation of N-glycosylation sites on human platelet proteins: a glycoproteomic approach.		0.000913	3	38	TGFB1,ITGB3,CD36
Pubmed	19141860	Genetic variants in the candidate genes of the apoptosis pathway and susceptibility to chronic myeloid leukemia.		0.001062	3	40	IL1A,IL1R1,IFNGR2
Pubmed	10718198	Prediction of the coding sequences of unidentified human genes. XVI. The complete sequences of 150 new cDNA clones from brain which code for large proteins in vitro.		0.00107	5	153	ADAMTS9,TMEM2,DOCK6,FGD6,ATP2C1
Pubmed	17057644	A distinct PAR complex associates physically with VE-cadherin in vertebrate endothelial cells.		0.00109	2	10	JAM3,F11R
Pubmed	18773331	Correlation between genetic polymorphism of cytokine genes, plasma protein levels and bronchial asthma in the Han people in northern China.		0.00109	2	10	IL1A,IL1R1
Pubmed	17477815	Polymorphisms in proinflammatory genes and susceptibility to typhoid fever and paratyphoid fever.		0.00109	2	10	IL1A,IL1R1
Pubmed	11278614	Cloning and characterization of IL-1HY2, a novel interleukin-1 family member.		0.00109	2	10	IL1A,IL1R1
Pubmed	17690329	IL10 polymorphisms are associated with airflow obstruction in severe alpha1-antitrypsin deficiency.		0.00109	2	10	TGFB1,SERPINE2
Pubmed	17111197	A comprehensive analysis of 12 thrombophilic mutations and related parameters in patients with inflammatory bowel disease: data from Turkey.		0.00109	2	10	ITGB3,SERPINE1
Pubmed	18329369	Final stages of cytokinesis and midbody ring formation are controlled by BRUCE.		0.00109	2	10	EXOC4,CDC2
Pubmed	16567828	Risk of celiac disease in children with type 1 diabetes is modified by positivity for HLA-DQB1*02-DQA1*05 and TNF -308A.		0.00109	2	10	TGFB1,IL1A
Pubmed	12082590	The contribution of genetic factors to thrombotic and bleeding outcomes in coronary patients randomised to IIb/IIIa antagonists.		0.00109	2	10	ITGB3,SELE
Pubmed	19072566	Prevalence of prothrombotic polymorphisms in Greece.		0.00109	2	10	ITGB3,SERPINE1
Pubmed	18787502	Genetic Contributions to the Development of Retinopathy of Prematurity.		0.001328	2	11	HIF1A,IL1A
Pubmed	19251251	Association between genes of Disrupted in schizophrenia 1 (DISC1) interactors and schizophrenia supports the role of the DISC1 pathway in the etiology of major mental illnesses.		0.001589	2	12	PDE4D,PDE4B
Pubmed	19008959	The genetics of primary haemorrhagic stroke, subarachnoid haemorrhage and ruptured intracranial aneurysms in adults.		0.001589	2	12	ITGB3,SERPINE1
Pubmed	19110485	Genetic risk factors in typical haemolytic uraemic syndrome.		0.001589	2	12	ITGB3,SERPINE1
Pubmed	14566095	Population frequencies of single nucleotide polymorphisms (SNPs) in immuno-modulatory genes.		0.001589	2	12	TGFB1,IL1A
Pubmed	12514663	Potential thrombophilic mutations/polymorphisms in patients with no flow-limiting stenosis after myocardial infarction.		0.001589	2	12	ITGB3,SERPINE1
Pubmed	11714857	Genetic influences on lipid metabolism trait variability within the Stanislas Cohort.		0.001589	2	12	ITGB3,SELE
Pubmed	7695626	Differential expression of cytokine genes in HIV-1 tat transfected T and B cell lines.		0.001589	2	12	TGFB1,IL1A
Pubmed	18660489	Multiple genetic variants along candidate pathways influence plasma high-density lipoprotein cholesterol concentrations.		0.001692	6	250	REL,INSIG1,DHCR24,CD36,PLTP,NAMPT
Pubmed	19064572	Polymorphism in the IL18 gene and epithelial ovarian cancer in non-Hispanic white women.		0.001705	5	170	TGFB1,GADD45B,PTGIS,IL1R1,ICAM1
Pubmed	12975309	The secreted protein discovery initiative (SPDI), a large-scale effort to identify novel human secreted and transmembrane proteins: a bioinformatics assessment.		0.00172	13	1002	JAM3,DHRS3,TNFRSF10B,ACSF2,CXCL16,FAM55C,F11R,C14orf159,TSPAN13,FLRT3,C6orf89,CSGALNACT1,PIGU
Pubmed	10737800	Shotgun sequencing of the human transcriptome with ORF expressed sequence tags.		0.001794	7	343	SERPINE1,APLNR,BCAP29,FAM102A,STAB1,GRIK3,PVR
Pubmed	19497711	Assessment of 14 functional gene polymorphisms in Japanese patients with oral lichen planus: a pilot case-control study.		0.001871	2	13	TGFB1,IL1A
Pubmed	10580157	Gene organization and sequence of the region containing the ribosomal protein genes RPL13A and RPS11 in the human genome and conserved features in the mouse genome.		0.001871	2	13	SNORD34,RPL13A
Pubmed	15076187	Genetic influences on blood pressure within the Stanislas Cohort.		0.001871	2	13	ITGB3,SELE
Pubmed	19012493	Common Variants in Immune and DNA Repair Genes and Risk for Human Papillomavirus Persistence and Progression to Cervical Cancer.		0.001916	3	49	TGFB1,IL1A,IFNGR2
Pubmed	18936436	Prevalence in the United States of Selected Candidate Gene Variants: Third National Health and Nutrition Examination Survey, 1991-1994.		0.001916	3	49	TGFB1,ITGB3,SERPINE1
Pubmed	19074885	Genetic variants in apoptosis and immunoregulation-related genes are associated with risk of chronic lymphocytic leukemia.		0.002135	5	179	TNFRSF10B,VCAM1,IL1A,CXCR4,ICAM1
Pubmed	18655026	Proteomic analysis of ubiquitinated proteins in normal hepatocyte cell line Chang liver cells.		0.002502	2	15	KLF4,CDC2
Pubmed	14746139	Molecular variation at functional genes and the history of human populations--data on candidate genes for cardiovascular risk in the Mediterranean.		0.002502	2	15	ITGB3,SERPINE1
Pubmed	11341749	Candidate gene polymorphisms in cardiovascular disease: a comparative study of frequencies between a French and an Italian population.		0.002502	2	15	ITGB3,SELE
Pubmed	19110536	Analysis of 17 autoimmune disease-associated variants in type 1 diabetes identifies 6q23/TNFAIP3 as a susceptibility locus.		0.002851	2	16	TNFAIP3,IL1A
Pubmed	10391210	Patterns of single-nucleotide polymorphisms in candidate genes for blood-pressure homeostasis.		0.002851	2	16	SELE,ICAM1
Pubmed	8009369	Chromosome localizations of genes for five cAMP-specific phosphodiesterases in man and mouse.		0.002851	2	16	PDE4D,PDE4B
Pubmed	8764399	Intron-encoded, antisense small nucleolar RNAs: the characterization of nine novel species points to their direct role as guides for the 2'-O-ribose methylation of rRNAs.		0.00322	2	17	SNORD34,RPL13A
Pubmed	12124778	GADD45b and GADD45g are cdc2/cyclinB1 kinase inhibitors with a role in S and G2/M cell cycle checkpoints induced by genotoxic stress.		0.00322	2	17	GADD45B,CDC2
Pubmed	15857508	Proliferative activity of extracellular HIV-1 Tat protein in human epithelial cells: expression profile of pathogenetically relevant genes.		0.00322	2	17	TGFB1,CXCR4
Pubmed	9658081	Binding of human immunodeficiency virus type 1 to CD4 and CXCR4 receptors differentially regulates expression of inflammatory genes and activates the MEK/ERK signaling pathway.		0.00322	2	17	IL1A,CXCR4
Pubmed	19176441	Genome-wide interrogation of germline genetic variation associated with treatment response in childhood acute lymphoblastic leukemia.		0.003611	2	18	ST8SIA6,LMBRD2
Pubmed	19584075	Novel susceptibility loci for second primary tumors/recurrence in head and neck cancer patients: large-scale evaluation of genetic variants.		0.003611	2	18	TNFRSF10B,RNF2
Pubmed	19019335	Spontaneous preterm birth in African Americans is associated with infection and inflammatory response gene variants.		0.003673	4	125	TGFB1,SERPINE1,IL1A,IL1R1
Pubmed	18818748	Preterm birth in Caucasians is associated with coagulation and inflammation pathway gene variants.		0.003996	4	128	TGFB1,SERPINE1,IL1A,IL1R1
Pubmed	19527514	Racial disparity in pathophysiologic pathways of preterm birth based on genetic variants.		0.003996	4	128	TGFB1,SERPINE1,IL1A,IL1R1
Pubmed	16565220	Phosphoproteome analysis of the human mitotic spindle.		0.004227	5	210	HSPB1,TNFAIP1,FTSJ3,WDR43,CDC2
Pubmed	12694180	Mapping of the epitope of a monoclonal antibody protecting plasminogen activator inhibitor-1 against inactivating agents.		0.005	1	1	SERPINE1
Pubmed	19246900	ACP1 genetic polymorphism and coronary artery disease: an association study.		0.005	1	1	ACP1
Pubmed	10048930	Crystal structure of the MAPK phosphatase Pyst1 catalytic domain and implications for regulated activation.		0.005	1	1	DUSP6
Pubmed	11016923	Cathepsin B activity regulation. Heparin-like glycosaminogylcans protect human cathepsin B from alkaline pH-induced inactivation.		0.005	1	1	CTSB
Pubmed	16051607	Adhesion and Rac1-dependent regulation of biglycan gene expression by transforming growth factor-beta. Evidence for oxidative signaling through NADPH oxidase.		0.005	1	1	BGN
Pubmed	19063817	Plasminogen activator inhibitor-1 gene 4G/5G polymorphism in Turkish children with asthma and allergic rhinitis.		0.005	1	1	SERPINE1
Pubmed	15583854	Kit as a human oncogenic tyrosine kinase.		0.005	1	1	KIT
Pubmed	16157603	The coiled-coil domain is required for HS1 to bind to F-actin and activate Arp2/3 complex.		0.005	1	1	HCLS1
Pubmed	16491131	The association of DUSP6 gene with schizophrenia and bipolar disorder: its possible role in the development of bipolar disorder.		0.005	1	1	DUSP6
Pubmed	14990729	Extracellular Nef protein targets CD4+ T cells for apoptosis by interacting with CXCR4 surface receptors.		0.005	1	1	CXCR4
Pubmed	12204004	Human piebaldism: six novel mutations of the proto-oncogene KIT.		0.005	1	1	KIT
Pubmed	19144874	Enhanced CD36 scavenger receptor expression in THP-1 human monocytes in the presence of lupus plasma: linking autoimmunity and atherosclerosis.		0.005	1	1	CD36
Pubmed	6220706	Studies of the residual glycogen branching enzyme activity present in human skin fibroblasts from patients with type IV glycogen storage disease.		0.005	1	1	GBE1
Pubmed	8956044	Three new mutations (P183T, V150L, 528insG) and eleven sequence polymorphisms in Italian patients with galactose-1-phosphate uridyltransferase (GALT) deficiency.		0.005	1	1	GALT
Pubmed	17205326	The effect of interleukin-1alpha polymorphisms on bone mineral density and the risk of vertebral fractures.		0.005	1	1	IL1A
Pubmed	16429128	Lymphocyte transcellular migration occurs through recruitment of endothelial ICAM-1 to caveola- and F-actin-rich domains.		0.005	1	1	ICAM1
Pubmed	15246162	Human placenta-derived mesenchymal progenitor cells support culture expansion of long-term culture-initiating cells from cord blood CD34+ cells.		0.005	1	1	CD34
Pubmed	10726166	Expression of CD146 adhesion molecules (MUC18 or MCAM) in the thymic microenvironment.		0.005	1	1	MCAM
Pubmed	15886114	ICAM-1 co-stimulates target cells to facilitate antigen presentation.		0.005	1	1	ICAM1
Pubmed	17526803	Detection of the c-kit D816V mutation in systemic mastocytosis by allele-specific PCR.		0.005	1	1	KIT
Pubmed	11091191	PAI-1 promoter 4G/5G genotype as an additional risk factor for venous thrombosis in subjects with genetic thrombophilic defects.		0.005	1	1	SERPINE1
Pubmed	2538243	The major human rhinovirus receptor is ICAM-1.		0.005	1	1	ICAM1
Pubmed	12524171	Absence of association between an intercellular adhesion molecule 1 gene E469K polymorphism and Alzheimer's disease in Finnish patients.		0.005	1	1	ICAM1
Pubmed	17609252	G alpha(q/11)-coupled P2Y2 nucleotide receptor inhibits human keratinocyte spreading and migration.		0.005	1	1	P2RY2
Pubmed	14595120	Transforming growth factor-beta 1 induces apoptosis through Fas ligand-independent activation of the Fas death pathway in human gastric SNU-620 carcinoma cells.		0.005	1	1	TGFB1
Pubmed	10076063	Identification of a human cDNA encoding a novel protein structurally related to the yeast membrane-associated metalloprotease, Ste24p.		0.005	1	1	ZMPSTE24
Pubmed	15682683	Intercellular adhesion molecule 1 (ICAM-1) gene variant is associated with coronary artery calcification independent of soluble ICAM-1 levels.		0.005	1	1	ICAM1
Pubmed	12648761	Increased frequency of a new polymorphism in the cell division cycle 2 (cdc2) gene in patients with Alzheimer's disease and frontotemporal dementia.		0.005	1	1	CDC2
Pubmed	16020760	Linkage of ischemic stroke to the PDE4D region on 5q in a Swedish population.		0.005	1	1	PDE4D
Pubmed	17892594	Controversy surrounding the increased expression of TGF beta 1 in asthma.		0.005	1	1	TGFB1
Pubmed	17680535	[The relationship between the gene polymorphism of TGF-beta1 and early renal injury in patients with essential hypertension, and the effect of the gene polymorphism of TGF- beta1 on the individual treatment with valsartan]		0.005	1	1	TGFB1
Pubmed	15262999	cAMP potentiates ATP-evoked calcium signaling in human parotid acinar cells.		0.005	1	1	P2RX4
Pubmed	15485649	ZAK re-programs atrial natriuretic factor expression and induces hypertrophic growth in H9c2 cardiomyoblast cells.		0.005	1	1	ZAK
Pubmed	11384645	Expression of aminopeptidase N in human endometrium and regulation of its activity by estrogen.		0.005	1	1	ANPEP
Pubmed	15685228	Increased sensitivity to TRAIL-induced apoptosis occurs during the adenoma to carcinoma transition of colorectal carcinogenesis.		0.005	1	1	TNFRSF10B
Pubmed	19255449	Functional basis of protection against age-related macular degeneration conferred by a common polymorphism in complement factor B.		0.005	1	1	CFB
Pubmed	18701133	Nuclear expression of CXCR4 in tumor cells of non-small cell lung cancer is correlated with lymph node metastasis.		0.005	1	1	CXCR4
Pubmed	9827534	The major myosin phosphatase in skeletal muscle is a complex between the beta-isoform of protein phosphatase 1 and the MYPT2 gene product.		0.005	1	1	PPP1R12B
Pubmed	12499389	Mapping CD55 function. The structure of two pathogen-binding domains at 1.7 A.		0.005	1	1	CD55
Pubmed	18955451	Correlation of kinase genotype and clinical outcome in the North American Intergroup Phase III Trial of imatinib mesylate for treatment of advanced gastrointestinal stromal tumor: CALGB 150105 Study by Cancer and Leukemia Group B and Southwest Oncology Group.		0.005	1	1	KIT
Pubmed	18245894	[Genomic approaches to bone and joint diseases. An order made medical system for management of osteoporosis: an attempt using genetic information]		0.005	1	1	TGFB1
Pubmed	17614846	Genetic and epigenetic analysis of the KLF4 gene in gastric cancer.		0.005	1	1	KLF4
Pubmed	17272505	Mapping helper T-cell epitopes on platelet membrane glycoprotein IIIa in chronic autoimmune thrombocytopenic purpura.		0.005	1	1	ITGB3
Pubmed	14705223	The core protein of epican, a heparan sulfate proteoglycan on keratinocytes, is an alternative form of CD44.		0.005	1	1	IL1A
Pubmed	11267423	TGF-beta1 gene polymorphism is a risk factor for renal dysfunction in heart transplant recipients.		0.005	1	1	TGFB1
Pubmed	9300725	HIV-1 gp120 induces an association between CD4 and the chemokine receptor CXCR4.		0.005	1	1	CXCR4
Pubmed	11858479	Prospective study on soluble thrombomodulin and von Willebrand factor and the risk of ischemic and hemorrhagic stroke.		0.005	1	1	THBD
Pubmed	12353306	PAI-1 gene 4G/5G genotype: A risk factor for thrombosis in vessels of internal organs.		0.005	1	1	SERPINE1
Pubmed	17909012	Pediatric KIT wild-type and platelet-derived growth factor receptor alpha-wild-type gastrointestinal stromal tumors share KIT activation but not mechanisms of genetic progression with adult gastrointestinal stromal tumors.		0.005	1	1	KIT
Pubmed	14523474	Cobalt chloride and low oxygen tension trigger differentiation of acute myeloid leukemic cells: possible mediation of hypoxia-inducible factor-1alpha.		0.005	1	1	HIF1A
Pubmed	11979351	Plasminogen activator inhibitor-1 4G/5G genetic polymorphism does not affect peritoneal transport characteristic.		0.005	1	1	SERPINE1
Pubmed	18372165	Molecular and clinical characterization in Japanese and Korean patients with Hailey-Hailey disease: six new mutations in the ATP2C1 gene.		0.005	1	1	ATP2C1
Pubmed	11709656	Identification and functional assessment of endothelial P1H12.		0.005	1	1	MCAM
Pubmed	12740362	Heat shock protein 27 controls apoptosis by regulating Akt activation.		0.005	1	1	HSPB1
Pubmed	12943995	TGF beta1 induces multiple independent signals to regulate human trophoblastic differentiation: mechanistic insights.		0.005	1	1	TGFB1
Pubmed	15662526	Relationship between intracellular localization of p34cdc2 protein and differentiation of esophageal squamous cell carcinoma.		0.005	1	1	CDC2
Pubmed	1384492	Platelet-agglutinating protein p37 from a thrombotic thrombocytopenic purpura plasma forms complexes with platelet membrane glycoprotein IV (CD36).		0.005	1	1	CD36
Pubmed	15191349	The prevalence of 4G5G polymorphism of plasminogen activator inhibitor-1 (PAI-1) gene in polycystic ovarian syndrome and its association with plasma PAI-1 levels.		0.005	1	1	SERPINE1
Pubmed	12514788	Transforming growth factor-beta1 induces tumor stroma and reduces tumor infiltrate in cervical cancer.		0.005	1	1	TGFB1
Pubmed	16242000	CD117+ small cell lung cancer lacks the asp 816-->val point mutation in exon 17.		0.005	1	1	KIT
Pubmed	17703087	Pancreatic stellate cells potentiate proinvasive effects of SERPINE2 expression in pancreatic cancer xenograft tumors.		0.005	1	1	SERPINE2
Pubmed	10556825	Schistosoma mansoni schistosomula reduce E-selectin and VCAM-1 expression in TNF-alpha-stimulated lung microvascular endothelial cells by interfering with the NF-kappaB pathway.		0.005	1	1	VCAM1
Pubmed	12811528	RAS-mediated epigenetic inactivation of OPCML in oncogenic transformation of human ovarian surface epithelial cells.		0.005	1	1	CD55
Pubmed	18082198	Association of polymorphisms in TGFB1 and prostate cancer prognosis.		0.005	1	1	TGFB1
Pubmed	18334485	Culturing of human mesenchymal stem cells as three-dimensional aggregates induces functional expression of CXCR4 that regulates adhesion to endothelial cells.		0.005	1	1	CXCR4
Pubmed	19528989	Circulating TGF-beta1 as a reliable biomarker for chronic kidney disease progression in the African-American population.		0.005	1	1	TGFB1
Pubmed	9790984	Three novel integrin beta3 subunit missense mutations (H280P, C560F, and G579S) in thrombasthenia, including one (H280P) prevalent in Japanese patients.		0.005	1	1	ITGB3
Pubmed	14629479	Glanzmann's thrombasthenia due to a point mutation within intron 10 results in aberrant splicing of the beta3 gene.		0.005	1	1	ITGB3
Pubmed	18673340	Ultrastructural localization of glycoprotein IIIa (GPIIIa, beta 3 integrin) on placental syncytiotrophoblast microvilli: implications for platelet alloimmunization during pregnancy.		0.005	1	1	ITGB3
Pubmed	1282492	Conservation of a 23-kDa human transplantation antigen in mammalian species.		0.005	1	1	RPL13A
Pubmed	16061287	Does complement factor B have a role in the pathogenesis of atypical HUS?		0.005	1	1	CFB
Pubmed	18337117	Evaluation of the transforming growth factor beta1 codon 25 (Arg-->Pro) polymorphism in alcoholic liver disease.		0.005	1	1	TGFB1
Pubmed	18542042	[Clinical and molecular characterization of gastrointestinal stromal tumors (GIST)]		0.005	1	1	KIT
Pubmed	9230113	Localization of human heparan glucosaminyl N-deacetylase/N-sulphotransferase to the trans-Golgi network.		0.005	1	1	NDST1
Pubmed	15339698	Type I CD36 deficiency in hematologic disorder.		0.005	1	1	CD36
Pubmed	18534188	Hydrogen peroxide enhances TRAIL-induced cell death through up-regulation of DR5 in human astrocytic cells.		0.005	1	1	TNFRSF10B
Pubmed	15979077	Vitamin E inhibits CD36 scavenger receptor expression in hypercholesterolemic rabbits.		0.005	1	1	CD36
Pubmed	17472574	Identification of protein-ribulosamine-5-phosphatase as human low-molecular-mass protein tyrosine phosphatase-A.		0.005	1	1	ACP1
Pubmed	18383878	High serum level of plasminogen activator inhibitor-1 predicts histological grade of intracerebral gliomas.		0.005	1	1	SERPINE1
Pubmed	15131123	The oligomerization state determines regulatory properties and inhibitor sensitivity of type 4 cAMP-specific phosphodiesterases.		0.005	1	1	PDE4D
Pubmed	15166947	Association of the platelet glycoprotein receptor IIIa (PlA1/PlA1) genotype with coronary artery disease in Arabs.		0.005	1	1	ITGB3
Pubmed	15935835	Relationship between a novel polymorphism of hepatic lipase gene and coronary artery disease.		0.005	1	1	SERPINE1
Pubmed	3162913	Latent high molecular weight complex of transforming growth factor beta 1. Purification from human platelets and structural characterization.		0.005	1	1	TGFB1
Pubmed	16780585	Decorin and TGF-beta1 polymorphisms and development of COPD in a general population.		0.005	1	1	TGFB1
Pubmed	18401716	Polymorphisms of the ICAM-1 gene are associated with biliary atresia.		0.005	1	1	ICAM1
Pubmed	19030842	Are elevated circulating intercellular adhesion molecule 1 levels more strongly predictive of diabetes than vascular risk? Outcome of a prospective study in the elderly.		0.005	1	1	ICAM1
Pubmed	12431651	TGF-beta 1 gene expression in stable renal transplant recipients: influence of TGF-beta 1 gene polymorphism and immunosuppression.		0.005	1	1	TGFB1
Pubmed	18942221	K469E polymorphism of the intracellular adhesion molecule 1 gene is associated with proliferative diabetic retinopathy in Caucasians with type 2 diabetes.		0.005	1	1	ICAM1
Pubmed	16118203	The homophilic binding of junctional adhesion molecule-C mediates tumor cell-endothelial cell interactions.		0.005	1	1	JAM3
Pubmed	19492421	Self-renewal and pluripotency is maintained in human embryonic stem cells by co-culture with human fetal liver stromal cells expressing hypoxia inducible factor 1alpha.		0.005	1	1	HIF1A
Pubmed	1406630	Selection of optimal kappa B/Rel DNA-binding motifs: interaction of both subunits of NF-kappa B with DNA is required for transcriptional activation.		0.005	1	1	REL
Pubmed	12031507	Identification of a novel smooth muscle associated protein, smap2, upregulated during neointima formation in a rat carotid endarterectomy model.		0.005	1	1	SMOC2
Pubmed	9050910	A human UDP-GalNAc: polypeptide, N-acetylgalactosaminyltransferase type 1 gene is located at the chromosomal region 18q12.1.		0.005	1	1	GALNT1
Pubmed	18350290	Effects of synovial fluid from aseptic prosthesis loosening on collagen production in osteoblasts.		0.005	1	1	PCOLCE
Pubmed	18361930	Expression of endothelial intercellular adhesion molecule-1 is determined by genotype: effects on efficiency of leukocyte adhesion to human endothelial cells.		0.005	1	1	ICAM1
Pubmed	12362251	The impact of the PAI-1 A((-844))G promoter polymorphism on the risk and extent of coronary heart disease.		0.005	1	1	SERPINE1
Pubmed	19683496	Cdk1 participates in BRCA1-dependent S phase checkpoint control in response to DNA damage.		0.005	1	1	CDC2
Pubmed	6149934	Purification and characterization of aminopeptidase N from human plasma.		0.005	1	1	ANPEP
Pubmed	12902461	Cutting edge: SR-PSOX/CXC chemokine ligand 16 mediates bacterial phagocytosis by APCs through its chemokine domain.		0.005	1	1	CXCL16
Pubmed	19565516	Relationship between elevated cerebrospinal fluid levels of plasminogen activator inhibitor 1 and neuronal destruction in patients with neuropsychiatric systemic lupus erythematosus.		0.005	1	1	SERPINE1
Pubmed	7691867	Immunohistochemical properties of the endothelial cells in the human uterus during the menstrual cycle.		0.005	1	1	VCAM1
Pubmed	16875935	Single nucleotide polymorphisms of the TGFB1 gene and lung cancer risk in a Korean population.		0.005	1	1	TGFB1
Pubmed	417724	Studies on cathepsin B in human articular cartilage.		0.005	1	1	CTSB
Pubmed	18272217	Chronic stretching of amniotic epithelial cells increases pre-B cell colony-enhancing factor (PBEF/visfatin) expression and protects them from apoptosis.		0.005	1	1	NAMPT
Pubmed	19088045	Protein expression profiling in esophageal adenocarcinoma patients indicates association of heat-shock protein 27 expression and chemotherapy response.		0.005	1	1	HSPB1
Pubmed	17440718	Contribution of single nucleotide polymorphisms of the IL1A gene to the cleavage of precursor IL-1alpha and its transcription activity.		0.005	1	1	IL1A
Pubmed	19331718	Correlation of plasma transforming growth factor beta 1 with asthma control test.		0.005	1	1	TGFB1
Pubmed	15862307	A targeted antioxidant reveals the importance of mitochondrial reactive oxygen species in the hypoxic signaling of HIF-1alpha.		0.005	1	1	HIF1A
Pubmed	16623952	Nuclear FABP7 immunoreactivity is preferentially expressed in infiltrative glioma and is associated with poor prognosis in EGFR-overexpressing glioblastoma.		0.005	1	1	FABP7
Pubmed	16796899	[Relationship between polymorphisms of plasminogen activator inhibitor-1 promoter gene and pulmonary thromboembolism in Chinese Han population]		0.005	1	1	SERPINE1
Pubmed	15805274	Drastic down-regulation of Kr�ppel-like factor 4 expression is critical in human gastric cancer development and progression.		0.005	1	1	KLF4
Pubmed	16473908	Onset of anthrax toxin pore formation.		0.005	1	1	ANTXR2
Pubmed	8059607	Neonatal hypotonia and cardiomyopathy secondary to type IV glycogenosis.		0.005	1	1	GBE1
Pubmed	17062678	Structural characterization and fine chromosomal mapping of the human P2Y1 purinergic receptor gene (P2RY1).		0.005	1	1	SERPINE1
Pubmed	8225386	Human complement factor B: functional properties of a recombinant zymogen of the alternative activation pathway convertase.		0.005	1	1	CFB
Pubmed	17519536	KCl depolarization increases HIF-1 transcriptional activity via the calcium-independent pathway in SGC7901 gastric cancer cells.		0.005	1	1	HIF1A
Pubmed	18482273	Serum levels of soluble vascular cell adhesion molecule are related to hyperdynamic circulation in patients with liver cirrhosis.		0.005	1	1	VCAM1
Pubmed	12667064	Integrin alpha4beta1-dependent adhesion to ADAM 28 (MDC-L) requires an extended surface of the disintegrin domain.		0.005	1	1	ADAM28
Pubmed	16098468	Neuronal apoptosis linked to EglN3 prolyl hydroxylase and familial pheochromocytoma genes: developmental culling and cancer.		0.005	1	1	EGLN3
Pubmed	17805961	Hypoxia-inducible factor 1alpha is closely linked to an aggressive phenotype in breast cancer.		0.005	1	1	HIF1A
Pubmed	14517477	Blood pressure phenotypes in relation to the beta-adducin C1797T polymorphism in the European Project on Genes in Hypertension (EPOGH).		0.005	1	1	ADD2
Pubmed	17570736	Transforming growth factor beta-1 -509C>T polymorphism in Indian patients with primary open angle glaucoma.		0.005	1	1	TGFB1
Pubmed	17490410	Chlamydia pneumoniae directly interferes with HIF-1alpha stabilization in human host cells.		0.005	1	1	HIF1A
Pubmed	18312614	Role of TGF-beta1 haplotypes in the occurrence of myocardial infarction in young Italian patients.		0.005	1	1	TGFB1
Pubmed	11028489	Glycoprotein IIIa Pl(A1/A2) polymorphism and sudden cardiac death.		0.005	1	1	ITGB3
Pubmed	16722038	The increase in plasma levels of Nepsilon-(carboxymethyl)lysine during icodextrin treatment of peritoneal dialysis patients is not associated with increased plasma levels of vascular cell adhesion molecule-1.		0.005	1	1	VCAM1
Pubmed	16035619	Association of alphavbeta3 integrin expression with the metastatic potential and migratory and chemotactic ability of human osteosarcoma cells.		0.005	1	1	ITGB3
Pubmed	18435794	Severe mandibuloacral dysplasia caused by novel compound heterozygous ZMPSTE24 mutations in two Japanese siblings.		0.005	1	1	ZMPSTE24
Pubmed	17959856	Fine specificity of drug-dependent antibodies reactive with a restricted domain of platelet GPIIIA.		0.005	1	1	ITGB3
Pubmed	1699207	Full length vascular cell adhesion molecule 1 (VCAM-1).		0.005	1	1	VCAM1
Pubmed	1612609	Fine mapping of the human biglycan (BGN) gene within the Xq28 region employing a hybrid cell panel.		0.005	1	1	BGN
Pubmed	11940570	Lipopolysaccharide-mediated reactive oxygen species and signal transduction in the regulation of interleukin-1 gene expression.		0.005	1	1	IL1A
Pubmed	2001252	Assignment of disulphide bonds in human platelet GPIIIa. A disulphide pattern for the beta-subunits of the integrin family.		0.005	1	1	ITGB3
Pubmed	16474993	Neuroprotective effect of A20 on TNF-induced postischemic apoptosis.		0.005	1	1	TNFAIP3
Pubmed	18440309	Elevated serum levels of intercellular adhesion molecule ICAM-1 in Pseudoxanthoma elasticum.		0.005	1	1	ICAM1
Pubmed	11528513	A new locus for autosomal dominant Charcot-Marie-Tooth disease type 2 (CMT2F) maps to chromosome 7q11-q21.		0.005	1	1	HSPB1
Pubmed	12595498	TGF-beta1-mediated inhibition of HK-2 cell migration.		0.005	1	1	TGFB1
Pubmed	9827716	Clinical correlates of the presence of the Asp816Val c-kit mutation in the peripheral blood mononuclear cells of patients with mastocytosis.		0.005	1	1	KIT
Pubmed	17707032	Association of transforming growth factor-beta1 gene polymorphism with familial vesicoureteral reflux.		0.005	1	1	TGFB1
Pubmed	18341540	Correlation of transforming growth factor beta-1 gene polymorphisms C-509T and T869C and the risk of gastric cancer in China.		0.005	1	1	TGFB1
Pubmed	12099689	HIF-1alpha-prolyl hydroxylase: molecular target of nitric oxide in the hypoxic signal transduction pathway.		0.005	1	1	HIF1A
Pubmed	18204921	Thrombomodulin gene polymorphisms in brain infarction and mortality after stroke.		0.005	1	1	THBD
Pubmed	15000149	TGFbeta and Wnt pathway cross-talk.		0.005	1	1	TGFB1
Pubmed	15016762	A novel TEAD1 mutation is the causative allele in Sveinsson's chorioretinal atrophy (helicoid peripapillary chorioretinal degeneration).		0.005	1	1	TEAD1
Pubmed	10545044	A novel missense mutation in the glycogen branching enzyme gene in a child with myopathy and hepatopathy.		0.005	1	1	GBE1
Pubmed	18688853	Promoter methylation of the bone morphogenetic protein-6 gene in association with adult T-cell leukemia.		0.005	1	1	BMP6
Pubmed	16818694	Clinical significance of aminopeptidase N in non-small cell lung cancer.		0.005	1	1	ANPEP
Pubmed	14983241	Common variants in the thrombomodulin gene as a risk for myocardial infarction in the north of Europe (HIFMECH Study).		0.005	1	1	THBD
Pubmed	15468167	Beta3 integrins facilitate matrix interactions during transendothelial migration of PC3 prostate tumor cells.		0.005	1	1	ITGB3
Pubmed	17409139	MEK1/2 inhibitors block basal and transforming growth factor 1beta1-stimulated JC virus multiplication.		0.005	1	1	TGFB1
Pubmed	19419896	Diabetic retinopathy, PAI-1 4G/5G and -844G/A polymorphisms, and changes in circulating PAI-1 levels in Tunisian type 2 diabetes patients.		0.005	1	1	SERPINE1
Pubmed	16046050	In vitro tumoral progression of human bladder carcinoma: role for TGFbeta.		0.005	1	1	TGFB1
Pubmed	11992540	Melphalan availability in hypoxia-inducible factor-1alpha+/+ and factor-1alpha-/- tumors is independent of tumor vessel density and correlates with melphalan erythrocyte transport.		0.005	1	1	HIF1A
Pubmed	9360997	Elevations in cathepsin B protein content and enzyme activity occur independently of glycosylation during colorectal tumor progression.		0.005	1	1	CTSB
Pubmed	16632604	Differential expression of IFN-alpha and TRAIL/DR5 in lymphoid tissue of progressor versus nonprogressor HIV-1-infected patients.		0.005	1	1	TNFRSF10B
Pubmed	15621724	Calcitonin.		0.005	1	1	CALCA
Pubmed	11966689	Mutation analysis of ATP2C1 gene in Taiwanese patients with Hailey-Hailey disease.		0.005	1	1	ATP2C1
Pubmed	16220461	[A novel KIT gene mutation results in piebaldism]		0.005	1	1	KIT
Pubmed	11592048	[The study of PAI-1 promotor region gene polymorphism in cerebrovascular disease]		0.005	1	1	SERPINE1
Pubmed	17145161	Desmoid and fibroma tumors differently respond to TGFbeta(1) stimulus and ECM macromolecule accumulation.		0.005	1	1	TGFB1
Pubmed	17372901	L576P KIT mutation in anal melanomas correlates with KIT protein expression and is sensitive to specific kinase inhibition.		0.005	1	1	KIT
Pubmed	8541536	Regulation of KChIP2 potassium channel beta subunit gene expression underlies the gradient of transient outward current in canine and human ventricle.		0.005	1	1	CD34
Pubmed	12626663	Prior increase in metallothionein levels is required to prevent doxorubicin cardiotoxicity.		0.005	1	1	SELE
Pubmed	15130917	Deciphering regulatory patterns of inflammatory gene expression from interleukin-1-stimulated human endothelial cells.		0.005	1	1	IL1A
Pubmed	18826602	The fatty acid binding protein 7 (FABP7) is involved in proliferation and invasion of melanoma cells.		0.005	1	1	FABP7
Pubmed	10744732	Quantitative expression analysis of genes regulated by both obesity and leptin reveals a regulatory loop between leptin and pituitary-derived ACTH.		0.005	1	1	TMED9
Pubmed	18851856	Intercellular adhesion molecule-1 K469E polymorphism in Korean patients with spontaneous preterm delivery.		0.005	1	1	ICAM1
Pubmed	16237647	Plasminogen activator inhibitor type 1 gene polymorphism and sepsis.		0.005	1	1	SERPINE1
Pubmed	9880804	Correlation between induction of expression of biglycan and mineralization by C-type natriuretic peptide in osteoblastic cells.		0.005	1	1	BGN
Pubmed	15218974	No association of the plasminogen activator inhibitor-1 promoter 4G/5G polymorphism with inhibitor level during basal transcription in vitro.		0.005	1	1	SERPINE1
Pubmed	15319367	Interleukin-1beta induces beta-calcitonin gene-related peptide secretion in human type II alveolar epithelial cells.		0.005	1	1	CALCA
Pubmed	16133898	The effect of glycoprotein IIIa PIA 1/A2 polymorphism on the PFA-100 response to GP IIb IIa receptor inhibitors-the importance of anticoagulants used.		0.005	1	1	ITGB3
Pubmed	18081507	Acute hypobaric hypoxia (5486 m) induces greater pulmonary HIF-1 activation in hilltop compared to madison rats.		0.005	1	1	HIF1A
Pubmed	17258347	Pharmacological inhibition of the vitronectin receptor abrogates PDGF-BB-induced hepatic stellate cell migration and activation in vitro.		0.005	1	1	ITGB3
Pubmed	19223178	Cdc2 as prognostic marker in stage UICC II colon carcinomas.		0.005	1	1	CDC2
Pubmed	10903920	Immediate and neurotoxic effects of HIV protein gp120 act through CXCR4 receptor.		0.005	1	1	CXCR4
Pubmed	1715789	Isolation of c-kit receptor-expressing cells from bone marrow, peripheral blood, and fetal liver: functional properties and composite antigenic profile.		0.005	1	1	KIT
Pubmed	17159347	Association analysis of genetic polymorphisms in the CDC2 gene with late-onset Alzheimer disease.		0.005	1	1	CDC2
Pubmed	16387590	Analysis of TGF-beta(1) gene polymorphisms in Hong Kong Chinese patients with asthma.		0.005	1	1	TGFB1
Pubmed	16533808	A C-terminal lysine that controls human P2X4 receptor desensitization.		0.005	1	1	P2RX4
Pubmed	15452229	Vascular endothelial growth factor-regulated gene expression in endothelial cells: KDR-mediated induction of Egr3 and the related nuclear receptors Nur77, Nurr1, and Nor1.		0.005	1	1	CXCR4
Pubmed	18794724	Plasminogen activator inhibitor-1 gene is associated with major depression and antidepressant treatment response.		0.005	1	1	SERPINE1
Pubmed	11924651	Genetic susceptibility in Dupuytren's disease. TGF-beta1 polymorphisms and Dupuytren's disease.		0.005	1	1	TGFB1
Pubmed	11479743	Galactosemia: deletion in the 5' upstream region of the GALT gene reduces promoter efficiency.		0.005	1	1	GALT
Pubmed	9044857	Identification of a breast cancer-specific gene, BCSG1, by direct differential cDNA sequencing.		0.005	1	1	SNCG
Pubmed	18680240	Correlation between expression and differentiation of endocan in colorectal cancer.		0.005	1	1	ESM1
Pubmed	17035001	Transforming-growth factor beta1 Leu10Pro polymorphism and breast cancer morbidity.		0.005	1	1	TGFB1
Pubmed	9973525	Extracellular HIV-1 tat protein up-regulates the expression of surface CXC-chemokine receptor 4 in resting CD4+ T cells.		0.005	1	1	CXCR4
Pubmed	19319949	Ala67Thr mutation in the poliovirus receptor CD155 is a potential risk factor for vaccine and wild-type paralytic poliomyelitis.		0.005	1	1	PVR
Pubmed	15175080	Hypoxia-inducible factor 1alpha/vascular endothelial growth factor axis in astrocytomas. Associations with microvessel morphometry, proliferation and prognosis.		0.005	1	1	HIF1A
Pubmed	8900485	Neuroendocrine-specific protein C (NSP-C): subcellular localization and differential expression in relation to NSP-A.		0.005	1	1	RTN1
Pubmed	8112600	Human gastric adenocarcinoma cathepsin B: isolation and sequencing of full-length cDNAs and polymorphisms of the gene.		0.005	1	1	CTSB
Pubmed	11145356	Polymorphisms in the IL-1A gene are correlated with levels of interleukin-1alpha protein in gingival crevicular fluid of teeth with severe periodontal disease.		0.005	1	1	IL1A
Pubmed	11259591	S338 phosphorylation of Raf-1 is independent of phosphatidylinositol 3-kinase and Pak3.		0.005	1	1	PAK3
Pubmed	18381425	Attenuation of junctional adhesion molecule-A is a contributing factor for breast cancer cell invasion.		0.005	1	1	F11R
Pubmed	16311903	Agonist-induced phosphorylation and desensitization of the P2Y2 nucleotide receptor.		0.005	1	1	P2RY2
Pubmed	17362927	Endocan is a VEGF-A and PI3K regulated gene with increased expression in human renal cancer.		0.005	1	1	ESM1
Pubmed	8702785	ESM-1 is a novel human endothelial cell-specific molecule expressed in lung and regulated by cytokines.		0.005	1	1	ESM1
Pubmed	16365142	Posttranslational, reversible O-glycosylation is stimulated by high glucose and mediates plasminogen activator inhibitor-1 gene expression and Sp1 transcriptional activity in glomerular mesangial cells.		0.005	1	1	SERPINE1
Pubmed	11824477	TGF-beta1 induces an accumulation of connexin43 in a lysosomal compartment in endothelial cells.		0.005	1	1	TGFB1
Pubmed	11053714	Meta-analysis of the association of platelet glycoprotein IIIa PlA1/A2 polymorphism with myocardial infarction.		0.005	1	1	ITGB3
Pubmed	19185944	Visfatin in gestational diabetes: serum level and mRNA expression in fat and placental tissue.		0.005	1	1	NAMPT
Pubmed	17486650	Mutation database for the galactose-1-phosphate uridyltransferase (GALT) gene.		0.005	1	1	GALT
Pubmed	17653872	The genetic predisposition to produce high levels of TGF-beta1 impacts on the severity of eclampsia/pre-eclampsia.		0.005	1	1	TGFB1
Pubmed	17429072	RKIKK motif in the intracellular domain is critical for spatial and dynamic organization of ICAM-1: functional implication for the leukocyte adhesion and transmigration.		0.005	1	1	ICAM1
Pubmed	17014924	Transforming growth factor-beta 1 levels in women with prior history of gestational diabetes mellitus.		0.005	1	1	TGFB1
Pubmed	16208522	Inconsistent effects of acidosis on HIF-alpha protein and its target genes.		0.005	1	1	HIF1A
Pubmed	19147528	Haplotype analysis of the CYP8A1 gene associated with myocardial infarction.		0.005	1	1	PTGIS
Pubmed	18288973	Human immunodeficiency virus-induced apoptosis of human breast cancer cells via CXCR4 is mediated by the viral envelope protein but does not require CD4.		0.005	1	1	CXCR4
Pubmed	16911713	Polymorphisms in exons 1B and 1C of the type I interleukin-1 receptor gene in patients with endometriosis.		0.005	1	1	IL1R1
Pubmed	19260117	Association between transforming growth factor beta1 genetic polymorphism and response to chemoradiotherapy in head and neck squamous cell cancer.		0.005	1	1	TGFB1
Pubmed	16236363	Lack of association between the TGF-beta1 gene polymorphisms and recurrent spontaneous abortion.		0.005	1	1	TGFB1
Pubmed	1712819	Immunocytochemical analysis of the cellular infiltrate in primary regressing and non-regressing malignant melanoma.		0.005	1	1	ICAM1
Pubmed	19414763	Presence of membrane-bound TGF-beta1 and its regulation by IL-2-activated immune cell-derived IFN-gamma in head and neck squamous cell carcinoma cell lines.		0.005	1	1	TGFB1
Pubmed	19235843	Allelic frequencies of HPA-1 to 5 human platelet antigens in patients infected with hepatitis C virus.		0.005	1	1	ITGB3
Pubmed	12105214	Expression of MRP4 confers resistance to ganciclovir and compromises bystander cell killing.		0.005	1	1	ABCC4
Pubmed	12525765	Transforming growth factor B1 T29C polymorphism and breast cancer risk in Japanese women.		0.005	1	1	TGFB1
Pubmed	16930678	Clonal senescence alters endothelial ICAM-1 function.		0.005	1	1	ICAM1
Pubmed	16014625	Involvement of transforming growth factor-beta 1 signaling in hypoxia-induced tolerance to glucose starvation.		0.005	1	1	TGFB1
Pubmed	15545997	Allelic loss underlies type 2 segmental Hailey-Hailey disease, providing molecular confirmation of a novel genetic concept.		0.005	1	1	ATP2C1
Pubmed	12894997	Identification of androgen-inducible TGF-beta1 derived from dermal papilla cells as a key mediator in androgenetic alopecia.		0.005	1	1	TGFB1
Pubmed	11924728	Association study between a novel single nucleotide polymorphism of the promoter region of the prostacyclin synthase gene and essential hypertension.		0.005	1	1	PTGIS
Pubmed	17710246	Maternal plasma procalcitonin concentrations in pregnancy complicated by preterm premature rupture of membranes.		0.005	1	1	CALCA
Pubmed	11257274	Functional mutation in the promoter region of thrombomodulin gene in relation to carotid atherosclerosis.		0.005	1	1	THBD
Pubmed	19204000	Activation of the oxidative stress pathway by HIV-1 Vpr leads to induction of hypoxia-inducible factor 1alpha expression.		0.005	1	1	HIF1A
Pubmed	17059371	Large-scale population-based study shows no association between common polymorphisms of the TGFB1 gene and BMD in women.		0.005	1	1	TGFB1
Pubmed	9744796	A role of Lys614 in the sulfotransferase activity of human heparan sulfate N-deacetylase/N-sulfotransferase.		0.005	1	1	NDST1
Pubmed	15943909	The CDM protein DOCK2 in lymphocyte migration.		0.005	1	1	SAR1B
Pubmed	12884029	p34cdc2 expression is an independent indicator for lymph node metastasis in colorectal carcinoma.		0.005	1	1	CDC2
Pubmed	9010927	Molecular modeling and mechanism of action of human decay-accelerating factor.		0.005	1	1	CD55
Pubmed	15738684	Continuous transforming growth factor beta1 secretion by cell-mediated gene therapy maintains chondrocyte redifferentiation.		0.005	1	1	TGFB1
Pubmed	11859093	Cutting Edge: Internalization of transduced E-selectin by cultured human endothelial cells: comparison of dermal microvascular and umbilical vein cells and identification of a phosphoserine-type di-leucine motif.		0.005	1	1	SELE
Pubmed	14983217	The structural basis for the pathophysiological relevance of PAI-I in cardiovascular diseases and the development of potential PAI-I inhibitors.		0.005	1	1	SERPINE1
Pubmed	15192088	Differential activation of Smads in HeLa and SiHa cells that differ in their response to transforming growth factor-beta.		0.005	1	1	TGFB1
Pubmed	16431903	Chemokine CXCL16, a scavenger receptor, induces proliferation and invasion of first-trimester human trophoblast cells in an autocrine manner.		0.005	1	1	CXCL16
Pubmed	8325890	The 28-kDa protein whose phosphorylation is induced by protein kinase C activators in MCF-7 cells belongs to the family of low molecular mass heat shock proteins and is the estrogen-regulated 24-kDa protein.		0.005	1	1	HSPB1
Pubmed	15178409	Paracrine effect of TGF-beta1 on downregulation of gap junctional intercellular communication between human dermal fibroblasts.		0.005	1	1	TGFB1
Pubmed	18940182	Thrombomodulin exerts cytoprotective effect on low-dose UVB-irradiated HaCaT cells.		0.005	1	1	THBD
Pubmed	18241953	Serum visfatin concentrations in obese adolescents and its correlation with age and high-density lipoprotein cholesterol.		0.005	1	1	NAMPT
Pubmed	9367365	Identification of residues critical for the human coronavirus 229E receptor function of human aminopeptidase N.		0.005	1	1	ANPEP
Pubmed	17676631	Association between 49 infant gene polymorphisms and preterm delivery.		0.005	1	1	SERPINE1
Pubmed	15277701	Analysis of primitive CD34- and CD34+ hematopoietic cells from adults: gain and loss of CD34 antigen by undifferentiated cells are closely linked to proliferative status in culture.		0.005	1	1	CD34
Pubmed	10392904	Oncogene expression cloning by retroviral transduction of adenovirus E1A-immortalized rat kidney RK3E cells: transformation of a host with epithelial features by c-MYC and the zinc finger protein GKLF.		0.005	1	1	KLF4
Pubmed	19380441	Single nucleotide polymorphism at rs1982073:T869C of the TGFbeta 1 gene is associated with the risk of radiation pneumonitis in patients with non-small-cell lung cancer treated with definitive radiotherapy.		0.005	1	1	TGFB1
Pubmed	17556870	Increased plasma levels of visfatin/pre-B cell colony-enhancing factor in obese and overweight patients with metabolic syndrome.		0.005	1	1	NAMPT
Pubmed	17941080	Transcriptional responses of human epidermal keratinocytes to cytokine interleukin-1.		0.005	1	1	IL1A
Pubmed	1627603	Human red cell acid phosphatase (ACP1): the primary structure of the two pairs of isozymes encoded by the ACP1*A and ACP1*C alleles.		0.005	1	1	ACP1
Pubmed	9302439	Co-expression of CXCR4/fusin and galactosylceramide in the human intestinal epithelial cell line HT-29.		0.005	1	1	CXCR4
Pubmed	7539925	The crystal structure of an N-terminal two-domain fragment of vascular cell adhesion molecule 1 (VCAM-1): a cyclic peptide based on the domain 1 C-D loop can inhibit VCAM-1-alpha 4 integrin interaction.		0.005	1	1	VCAM1
Pubmed	18626012	Preprocalcitonin signal peptide generates a cytotoxic T lymphocyte-defined tumor epitope processed by a proteasome-independent pathway.		0.005	1	1	CALCA
Pubmed	16498398	A novel MGST2 non-synonymous mutation in a Chinese pedigree with psoriasis vulgaris.		0.005	1	1	MGST2
Pubmed	14553963	beta-Adducin polymorphisms, blood pressure, and sodium excretion in three European populations.		0.005	1	1	ADD2
Pubmed	18616292	Structural transitions of the RING1B C-terminal region upon binding the polycomb cbox domain.		0.005	1	1	RNF2
Pubmed	15387368	ICAM-1 supports adhesion of human small-cell lung carcinoma to endothelial cells.		0.005	1	1	ICAM1
Pubmed	19018560	Effect of intermittent hypoxic training on HIF gene expression in human skeletal muscle and leukocytes.		0.005	1	1	HIF1A
Pubmed	12086583	Cathepsin B expression and down-regulation by gene silencing and antisense DNA in human chondrocytes.		0.005	1	1	CTSB
Pubmed	12445304	The role of CD55 in protecting the tumour environment from complement attack.		0.005	1	1	CD55
Pubmed	16087758	Mutation analysis of the small heat shock protein 27 gene in chinese patients with Charcot-Marie-Tooth disease.		0.005	1	1	HSPB1
Pubmed	16710309	Neuropeptide (calcitonin gene-related peptide) induction of nitric oxide in human keratinocytes in vitro.		0.005	1	1	CALCA
Pubmed	15694998	Impact of TGFbeta1 gene polymorphisms on late renal function in pediatric heart transplantation.		0.005	1	1	TGFB1
Pubmed	15947089	Inhibition of mitochondrial respiration elevates oxygen concentration but leaves regulation of hypoxia-inducible factor (HIF) intact.		0.005	1	1	HIF1A
Pubmed	8751459	c-kit ligand stimulates tyrosine phosphorylation of the c-Cbl protein in human hematopoietic cells.		0.005	1	1	KIT
Pubmed	19185504	Cellular fatty acid uptake: a pathway under construction.		0.005	1	1	CD36
Pubmed	19365037	TGFB1 as a susceptibility gene for high myopia: a replication study with new findings.		0.005	1	1	TGFB1
Pubmed	17342762	Rho plays a central role in regulating local cell-matrix mechanical interactions in 3D culture.		0.005	1	1	RHOD
Pubmed	7694683	Amino acid 489 is encoded by a mutational "hot spot" on the beta 3 integrin chain: the CA/TU human platelet alloantigen system.		0.005	1	1	ITGB3
Pubmed	18949419	The C1772T genetic polymorphism in human HIF-1alpha gene associates with expression of HIF-1alpha protein in breast cancer.		0.005	1	1	HIF1A
Pubmed	19020745	Relations among expression of CXCR4, histological patterns, and metastatic potential in adenoid cystic carcinoma of the head and neck.		0.005	1	1	CXCR4
Pubmed	17713282	[Association between polymorphisms of HIF-1alpha C1772T and G1790A and hypoxic acclimation in high altitude in Tibetans]		0.005	1	1	HIF1A
Pubmed	19413744	CD36 deficiency protects against malarial anaemia in children by reducing Plasmodium falciparum-infected red blood cell adherence to vascular endothelium.		0.005	1	1	CD36
Pubmed	2578663	Calcitonin gene-related peptide and its binding sites in the human central nervous system and pituitary.		0.005	1	1	CALCA
Pubmed	11566883	Independent function of two destruction domains in hypoxia-inducible factor-alpha chains activated by prolyl hydroxylation.		0.005	1	1	HIF1A
Pubmed	19643665	The ubiquitin-editing enzyme A20 (TNFAIP3) is a central regulator of immunopathology.		0.005	1	1	TNFAIP3
Pubmed	17989584	Transforming growth factor beta and wound healing in human cholesteatoma.		0.005	1	1	TGFB1
Pubmed	16152588	Effect of an anti-CD54 (ICAM-1) monoclonal antibody (UV3) on the growth of human uveal melanoma cells transplanted heterotopically and orthotopically in SCID mice.		0.005	1	1	ICAM1
Pubmed	7929355	Protease inhibitors block lipopolysaccharide induction of tissue factor gene expression in human monocytic cells by preventing activation of c-Rel/p65 heterodimers.		0.005	1	1	REL
Pubmed	19462508	Active TGF-beta1 correlates with myofibroblasts and malignancy in the colorectal adenoma-carcinoma sequence.		0.005	1	1	TGFB1
Pubmed	9700155	Dual roles for Ste24p in yeast a-factor maturation: NH2-terminal proteolysis and COOH-terminal CAAX processing.		0.005	1	1	ZMPSTE24
Pubmed	10425220	HIF1A gene transcription is dependent on a core promoter sequence encompassing activating and inhibiting sequences located upstream from the transcription initiation site and cis elements located within the 5'UTR.		0.005	1	1	HIF1A
Pubmed	19440016	Significance of serum calcitonin gene-related peptide levels in prostate cancer patients receiving hormonal therapy.		0.005	1	1	CALCA
Pubmed	16299052	Control of intracellular trafficking of ICAM-1-targeted nanocarriers by endothelial Na+/H+ exchanger proteins.		0.005	1	1	ICAM1
Pubmed	18499757	Seladin-1 is a fundamental mediator of the neuroprotective effects of estrogen in human neuroblast long-term cell cultures.		0.005	1	1	DHCR24
Pubmed	17047091	Angiotensinogen and transforming growth factor beta1: novel genes in the pathogenesis of Crohn's disease.		0.005	1	1	TGFB1
Pubmed	12664597	The synthesis of inositol hexakisphosphate. Characterization of human inositol 1,3,4,5,6-pentakisphosphate 2-kinase.		0.005	1	1	PTGIS
Pubmed	19158434	Lack of association between interleukin-1 alpha rs1800587 polymorphism and Alzheimer's disease in two Independent European samples.		0.005	1	1	IL1A
Pubmed	17890953	Laboratory evidence of hyperfibrinolysis in association with low plasminogen activator inhibitor type 1 activity.		0.005	1	1	SERPINE1
Pubmed	14605330	4G/4G genotype of PAI-1 gene is associated with reduced risk of stroke in elderly.		0.005	1	1	SERPINE1
Pubmed	7538217	Effects of modified low density lipoprotein and hypoxia on the expression of endothelial leukocyte adhesion molecule-1.		0.005	1	1	SELE
Pubmed	16541130	Knockdown of CD146 reduces the migration and proliferation of human endothelial cells.		0.005	1	1	MCAM
Pubmed	12169456	Changes in fatty acid transport and transporters are related to the severity of insulin deficiency.		0.005	1	1	CD36
Pubmed	15833936	E-selectin genotypes and risk of type 2 diabetes in women.		0.005	1	1	SELE
Pubmed	10101024	Post-transcriptional regulation of MyD118 and GADD45 in human lung carcinoma cells during 6-[3-(1-adamantyl)-4-hydroxyphenyl]-2- naphthalene carboxylic acid-induced apoptosis.		0.005	1	1	GADD45B
Pubmed	12888867	Biochemical importance of glycosylation of plasminogen activator inhibitor-1.		0.005	1	1	SERPINE1
Pubmed	16445822	Female adnexal tumor of probable wolffian origin: morphological, immunohistochemical, and ultrastructural study with c-kit gene analysis.		0.005	1	1	KIT
Pubmed	16215937	[Mutation analysis of small heat shock protein 27 gene in Chinese patients with Charcot-Marie-Tooth disease]		0.005	1	1	HSPB1
Pubmed	19285572	Transforming growth factor-beta1 and its receptors in patients with ulcerative colitis.		0.005	1	1	TGFB1
Pubmed	7694691	Divergent fates of P- and E-selectins after their expression on the plasma membrane.		0.005	1	1	SELE
Pubmed	15843979	4G/5G promoter polymorphism in the plasminogen-activator-inhibitor-1 gene in children with systemic meningococcaemia.		0.005	1	1	SERPINE1
Pubmed	16773312	Systematic evaluation of association between the microsomal glutathione S-transferase 2 common variation and psoriasis vulgaris in Chinese population.		0.005	1	1	MGST2
Pubmed	17200350	Expression of adipose differentiation-related protein: a predictor of cancer-specific survival in clear cell renal carcinoma.		0.005	1	1	PLIN2
Pubmed	12820391	Prognostic significance of death-associated protein-kinase expression in hepatocellular carcinomas.		0.005	1	1	DAPK1
Pubmed	19016618	CD36 gene promoter polymorphisms are associated with low density lipoprotein-cholesterol in normal twins and after a low-calorie diet in obese subjects.		0.005	1	1	CD36
Pubmed	11908512	Plasminogen activator inhibitor-I (PAI-I) polymorphisms in patients with obstructive sleep apnoea.		0.005	1	1	SERPINE1
Pubmed	16563223	Modern pathogenetic concepts of liver fibrosis suggest stellate cells and TGF-beta as major players and therapeutic targets.		0.005	1	1	TGFB1
Pubmed	15287756	Human glycolipid transfer protein: probing conformation using fluorescence spectroscopy.		0.005	1	1	GLTP
Pubmed	19420919	E-selectin genetic variation as a susceptibility factor for ischemic stroke.		0.005	1	1	SELE
Pubmed	16133360	Elastofibroma: clonal fibrous proliferation with predominant CD34-positive cells.		0.005	1	1	CD34
Pubmed	15479819	The C-mer gene is induced by Epstein-Barr virus immediate-early protein BRLF1.		0.005	1	1	MERTK
Pubmed	16978607	Extracellular HIV-1 Nef increases migration of monocytes.		0.005	1	1	CXCR4
Pubmed	17071479	CD36 (thrombospondin receptor) expression in childhood acute megakaryoblastic leukemia: in vitro drug sensitivity and outcome.		0.005	1	1	CD36
Pubmed	18370914	Hypoxia, hormones, and endothelial progenitor cells in hemangioma.		0.005	1	1	HIF1A
Pubmed	18284942	Large-scale analysis of association between polymorphisms in the transforming growth factor beta 1 gene (TGFB1) and osteoporosis: the GENOMOS study.		0.005	1	1	TGFB1
Pubmed	16507929	Intracellular adhesion molecule concentrations in women who smoke during pregnancy.		0.005	1	1	ICAM1
Pubmed	19255431	Integrative analysis of HIF binding and transactivation reveals its role in maintaining histone methylation homeostasis.		0.005	1	1	HIF1A
Pubmed	16204154	CD146 (Mel-CAM), an adhesion marker of endothelial cells, is a novel marker of lymphocyte subset activation in normal peripheral blood.		0.005	1	1	MCAM
Pubmed	17893997	Regulation of cytokine-induced HIF-1alpha expression in rheumatoid synovial fibroblasts.		0.005	1	1	HIF1A
Pubmed	17376051	Analysis of common transforming growth factor beta-1 gene polymorphisms in gastric and duodenal ulcer disease: pilot study.		0.005	1	1	TGFB1
Pubmed	18821144	Transforming growth factor beta1 T29C gene polymorphism and hypertension: relationship with cardiovascular and renal damage.		0.005	1	1	TGFB1
Pubmed	12351385	Human CD34(+)CXCR4(-) sorted cells harbor intracellular CXCR4, which can be functionally expressed and provide NOD/SCID repopulation.		0.005	1	1	CXCR4
Pubmed	19018266	Analysis of c-KIT expression and KIT gene mutation in human mucosal melanomas.		0.005	1	1	KIT
Pubmed	19515727	Polymorphisms in multidrug resistance-associated protein gene 4 is associated with outcome in childhood acute lymphoblastic leukemia.		0.005	1	1	ABCC4
Pubmed	15539010	Transforming growth factor-beta: a clinical target for the treatment of diabetic nephropathy.		0.005	1	1	TGFB1
Pubmed	7519480	Molecular basis of reduced or absent expression of decay-accelerating factor in Cromer blood group phenotypes.		0.005	1	1	CD55
Pubmed	10725738	Characterization of synthetic C3a analog peptides on human eosinophils in comparison to the native complement component C3a.		0.005	1	1	C3AR1
Pubmed	12031986	Thrombomodulin deficiency in human diabetic nerve microvasculature.		0.005	1	1	THBD
Pubmed	11836565	The induction of apoptosis by a combined 1,25(OH)2D3 analog, EB1089 and TGF-beta1 in NCI-H929 multiple myeloma cells.		0.005	1	1	TGFB1
Pubmed	14983027	The precursor form of IL-1alpha is an intracrine proinflammatory activator of transcription.		0.005	1	1	IL1A
Pubmed	18222538	Proteasomal activity in placentas from women with preeclampsia and intrauterine growth restriction: implications for expression of HIF-alpha proteins.		0.005	1	1	HIF1A
Pubmed	16282361	Substrate specificity of human ABCC4 (MRP4)-mediated cotransport of bile acids and reduced glutathione.		0.005	1	1	ABCC4
Pubmed	12565854	Inhibition of the TEF/TEAD transcription factor activity by nuclear calcium and distinct kinase pathways.		0.005	1	1	TEAD1
Pubmed	3259294	Human brain calcitonin gene-related peptide (CGRP) is concentrated in the locus caeruleus.		0.005	1	1	CALCA
Pubmed	19608201	Phosphodiesterase 4D (PDE4D) gene variants and the risk of ischemic stroke in a South Indian population.		0.005	1	1	PDE4D
Pubmed	8797804	A20, an inhibitor of cell death, self-associates by its zinc finger domain.		0.005	1	1	TNFAIP3
Pubmed	15387373	Transforming growth factor-beta facilitates breast carcinoma metastasis by promoting tumor cell survival.		0.005	1	1	TGFB1
Pubmed	18644234	17beta-estradiol regulates the secretion of TGF-beta by cultured human dermal fibroblasts.		0.005	1	1	TGFB1
Pubmed	7691885	Identification of mutations in the coding sequence of the proto-oncogene c-kit in a human mast cell leukemia cell line causing ligand-independent activation of c-kit product.		0.005	1	1	KIT
Pubmed	9685362	Activation of phospholipase C-beta1 via Galphaq/11 during calcium mobilization by calcitonin gene-related peptide.		0.005	1	1	CALCA
Pubmed	17990985	Genetic variation in transforming growth factor-beta1 gene associated with increased risk of esophageal squamous cell carcinoma.		0.005	1	1	TGFB1
Pubmed	8053900	Phosphorylation of the human-transforming-growth-factor-beta-binding protein endoglin.		0.005	1	1	TGFB1
Pubmed	18421000	Acute elevation of plasma PLTP activity strongly increases pre-existing atherosclerosis.		0.005	1	1	PLTP
Pubmed	19211748	Intercellular adhesion molecule 1 (ICAM-1), but not ICAM-2 and -3, is important for dendritic cell-mediated human immunodeficiency virus type 1 transmission.		0.005	1	1	ICAM1
Pubmed	10533307	Glycogen storage disease type IV: a case report.		0.005	1	1	GBE1
Pubmed	12522014	Src and phosphatidylinositol 3-kinase mediate soluble E-selectin-induced angiogenesis.		0.005	1	1	SELE
Pubmed	16958029	Association of the human kainate receptor GluR7 gene (GRIK3) with recurrent major depressive disorder.		0.005	1	1	GRIK3
Pubmed	12368985	A novel mutation in neonatal isolated sulphite oxidase deficiency.		0.005	1	1	SUOX
Pubmed	18621534	Expression of hypoxia inducible factor-1alpha in tumors of patients with glioblastoma multiforme and transitional meningioma.		0.005	1	1	HIF1A
Pubmed	16039988	Decreased expression of Hsp27 and Hsp70 in transformed lymphoblastoid cells from patients with spinocerebellar ataxia type 7.		0.005	1	1	HSPB1
Pubmed	11810274	TGFbeta1 allele association with asthma severity.		0.005	1	1	TGFB1
Pubmed	12145738	Variable number tandem repeat polymorphism of the interleukin-1 receptor antagonist gene in meningococcal disease.		0.005	1	1	IL1R1
Pubmed	15878343	Activation of hypoxia-induced transcription in normoxia.		0.005	1	1	HIF1A
Pubmed	19018866	Aberrant methylation of the death-associated protein kinase 1 (DAPK1) CpG island in chronic myeloid leukemia.		0.005	1	1	DAPK1
Pubmed	17697137	4G4G genotype of the plasminogen activator inhibitor-1 promoter polymorphism associates with disseminated intravascular coagulation in children with systemic meningococcemia.		0.005	1	1	SERPINE1
Pubmed	17150207	C6ORF32 is upregulated during muscle cell differentiation and induces the formation of cellular filopodia.		0.005	1	1	FAM65B
Pubmed	18514099	Circulating CXCL16 is related to the severity of coronary artery stenosis.		0.005	1	1	CXCL16
Pubmed	19028544	Alpha-ketoglutarate abrogates the nuclear localization of HIF-1alpha in aluminum-exposed hepatocytes.		0.005	1	1	HIF1A
Pubmed	19259356	TGF-beta mediated epithelial-mesenchymal transition in autosomal dominant polycystic kidney disease.		0.005	1	1	TGFB1
Pubmed	12741817	Identification of the residues in the helix F/G loop important to catalytic function of membrane-bound prostacyclin synthase.		0.005	1	1	PTGIS
Pubmed	15831177	Targeting the molecular basis for tumour hypoxia.		0.005	1	1	HIF1A
Pubmed	15013836	Elevation of cell adhesion molecule immunoreactivity in the anterior cingulate cortex in bipolar disorder.		0.005	1	1	ICAM1
Pubmed	19279557	Circulating transforming growth factor-beta1 levels and the risk for kidney disease in African Americans.		0.005	1	1	TGFB1
Pubmed	12127369	C/T polymorphism of the intercellular adhesion molecule-1 gene (exon 6, codon 469). A risk factor for coronary heart disease and myocardial infarction.		0.005	1	1	ICAM1
Pubmed	17975134	Transforming growth factor-beta and the immune response to malignant disease.		0.005	1	1	TGFB1
Pubmed	18233990	Susceptibility to active decompensated cirrhosis is associated with polymorphisms of intercellular adhesion molecule-1 (ICAM-1) in chronic HBV carriers.		0.005	1	1	ICAM1
Pubmed	19608751	TNFAIP3/A20 functions as a novel tumor suppressor gene in several subtypes of non-Hodgkin lymphomas.		0.005	1	1	TNFAIP3
Pubmed	16080806	[Effect of E-selectin A561C (S128R) polymorphism on blood pressure]		0.005	1	1	SELE
Pubmed	19082473	The urokinase-system in tumor tissue stroma of the breast and breast cancer cell invasion.		0.005	1	1	SERPINE1
Pubmed	18186562	Promoter polymorphism of transforming growth factor-beta1 gene and ulcerative colitis.		0.005	1	1	TGFB1
Pubmed	12370804	A role for TGF-beta in estrogen and retinoid mediated regulation of the nuclear receptor coactivator AIB1 in MCF-7 breast cancer cells.		0.005	1	1	TGFB1
Pubmed	15543236	Ras-dependent induction of HIF-1alpha785 via the Raf/MEK/ERK pathway: a novel mechanism of Ras-mediated tumor promotion.		0.005	1	1	HIF1A
Pubmed	15389590	Upregulation of TNF-alpha-induced ICAM-1 surface expression by adenylate cyclase-dependent pathway in human endothelial cells.		0.005	1	1	ICAM1
Pubmed	17519386	PDE4B5, a novel, super-short, brain-specific cAMP phosphodiesterase-4 variant whose isoform-specifying N-terminal region is identical to that of cAMP phosphodiesterase-4D6 (PDE4D6).		0.005	1	1	PDE4B
Pubmed	19525448	Immunoimaging of CXCR4 expression in brain tumor xenografts using SPECT/CT.		0.005	1	1	CXCR4
Pubmed	16671880	The relationship of transforming growth factor-beta1 gene polymorphism, its plasma level, and gingival overgrowth in renal transplant recipients receiving different immunosuppressive regimens.		0.005	1	1	TGFB1
Pubmed	12938093	Identification of novel variants in transforming growth factor-beta 1 (TGFB1) gene and association analysis with bone mineral density.		0.005	1	1	TGFB1
Pubmed	10950862	HIF-1 and human disease: one highly involved factor.		0.005	1	1	HIF1A
Pubmed	18239648	Plasma visfatin concentration as a surrogate marker for visceral fat accumulation in obese children.		0.005	1	1	NAMPT
Pubmed	9056417	Defectively N-glycosylated and non-O-glycosylated aminopeptidase N (CD13) is normally expressed at the cell surface and has full enzymatic activity.		0.005	1	1	ANPEP
Pubmed	15465625	Association between the interleukin-1alpha gene and Alzheimer's disease: a meta-analysis.		0.005	1	1	IL1A
Pubmed	7914388	The poliovirus receptor: identification of domains and amino acid residues critical for virus binding.		0.005	1	1	PVR
Pubmed	8566798	Genomic organisation and chromosomal localisation of the gene encoding human beta adducin.		0.005	1	1	ADD2
Pubmed	16920492	Engagement of ICAM-1 by major group rhinoviruses activates the LFA-1/ICAM-3 cell adhesion pathway in mononuclear phagocytes.		0.005	1	1	ICAM1
Pubmed	18205868	Three novel ATP2C1 mutations in Chinese patients with Hailey-Hailey disease.		0.005	1	1	ATP2C1
Pubmed	16899602	Hypoxia-inducible factor-1alpha expression predicts a poor response to primary chemoendocrine therapy and disease-free survival in primary human breast cancer.		0.005	1	1	HIF1A
Pubmed	11895546	Effect of interleukin-1 gene polymorphism in a periodontally healthy Hispanic population treated with mucogingival surgery.		0.005	1	1	IL1A
Pubmed	14757763	Upstream stimulatory factor (USF) proteins induce human TGF-beta1 gene activation via the glucose-response element-1013/-1002 in mesangial cells: up-regulation of USF activity by the hexosamine biosynthetic pathway.		0.005	1	1	TGFB1
Pubmed	17615257	Transforming growth factor beta 1 (TGFB1) gene polymorphisms and risk of advanced colorectal adenoma.		0.005	1	1	TGFB1
Pubmed	17418979	An investigation of relationships between hypoxia-inducible factor-1 alpha gene polymorphisms and ovarian, cervical and endometrial cancers.		0.005	1	1	HIF1A
Pubmed	16399501	Sterol-regulated ubiquitination and degradation of Insig-1 creates a convergent mechanism for feedback control of cholesterol synthesis and uptake.		0.005	1	1	INSIG1
Pubmed	19178925	Raft localization of CXCR4 is primarily required for X4-tropic human immunodeficiency virus type 1 infection.		0.005	1	1	CXCR4
Pubmed	16675557	Ectopic expression of the proto-oncogene Mer in pediatric T-cell acute lymphoblastic leukemia.		0.005	1	1	MERTK
Pubmed	15814637	Expression of hypoxia-inducible factor-1alpha protein predicts survival in patients with transitional cell carcinoma of the upper urinary tract.		0.005	1	1	HIF1A
Pubmed	12969778	Expression and secretion of the vascular cell adhesion molecule-1 in human placenta and its decrease in fetal growth restriction.		0.005	1	1	VCAM1
Pubmed	18443272	Expression of c-Kit isoforms in multiple myeloma: differences in signaling and drug sensitivity.		0.005	1	1	KIT
Pubmed	17472841	High levels of complement C3a receptor in the glomeruli in lupus nephritis.		0.005	1	1	C3AR1
Pubmed	18957686	CXCR4 expression and biologic activity in acute myeloid leukemia are dependent on oxygen partial pressure.		0.005	1	1	CXCR4
Pubmed	1712644	Expression of the YB5.B8 antigen (c-kit proto-oncogene product) in normal human bone marrow.		0.005	1	1	KIT
Pubmed	19191721	Polymorphisms and plasma soluble levels of E-selectin in patients with chronic hepatitis B virus infection.		0.005	1	1	SELE
Pubmed	7958996	Differential CNS expression of alternative mRNA isoforms of the mammalian genes encoding cAMP-specific phosphodiesterases.		0.005	1	1	PDE4B
Pubmed	7791211	Crystal structure of the human cell cycle protein CksHs1: single domain fold with similarity to kinase N-lobe domain.		0.005	1	1	CKS1B
Pubmed	17487356	Expression of hypoxia-inducible factor-1 alpha and associated proteins in pancreatic ductal adenocarcinoma and their impact on prognosis.		0.005	1	1	HIF1A
Pubmed	15336968	SPCA1 pumps and Hailey-Hailey disease.		0.005	1	1	ATP2C1
Pubmed	9624168	Expression of plasma phospholipid transfer protein mRNA in normal and emphysematous lungs and regulation by hypoxia.		0.005	1	1	PLTP
Pubmed	18662272	Alternative transporter pathways in patients with untreated early-stage and late-stage primary biliary cirrhosis.		0.005	1	1	ABCC4
Pubmed	18592792	KIT protein expression in uterine sarcomas: an immunohistochemical study and review of the literature.		0.005	1	1	KIT
Pubmed	14684361	Involvement of calcitonin gene-related peptide in control of human fetoplacental vascular tone.		0.005	1	1	CALCA
Pubmed	17310251	Factor B structure provides insights into activation of the central protease of the complement system.		0.005	1	1	CFB
Pubmed	9450866	Piebaldism with deafness: molecular evidence for an expanded syndrome.		0.005	1	1	KIT
Pubmed	18373234	Decreased plasma soluble thrombomodulin levels as a risk factor for pulmonary thromboembolism.		0.005	1	1	THBD
Pubmed	18402670	N-acetyltransferase 8, a positional candidate for blood pressure and renal regulation: resequencing, association and in silico study.		0.005	1	1	NAT8
Pubmed	16724005	Variation in ITGB3 is associated with whole-blood serotonin level and autism susceptibility.		0.005	1	1	ITGB3
Pubmed	19341386	Preterm labor: CD55 in maternal blood leukocytes.		0.005	1	1	CD55
Pubmed	16098047	Expression of gp130 in tumors and inflammatory disorders of the skin: formal proof of its identity as CD146 (MUC18, Mel-CAM).		0.005	1	1	MCAM
Pubmed	19718013	Correlation between KIT expression and KIT mutation in melanoma: a study of 173 cases with emphasis on the acral-lentiginous/mucosal type.		0.005	1	1	KIT
Pubmed	16324212	TGF-beta1 and serum both stimulate contraction but differentially affect apoptosis in 3D collagen gels.		0.005	1	1	TGFB1
Pubmed	18225753	Study of hypoxia-induced expression of HIF-1alpha in retina pigment epithelium.		0.005	1	1	HIF1A
Pubmed	10497069	Cloning, expression, and purification of the functional 2,4-dienoyl-CoA reductase from rat liver mitochondria.		0.005	1	1	DECR1
Pubmed	14607332	The L10P polymorphism of the transforming growth factor-beta 1 gene is not associated with breast cancer risk.		0.005	1	1	TGFB1
Pubmed	18756605	Role of transforming growth factor-beta signaling pathway in pathogenesis of benign biliary stricture.		0.005	1	1	TGFB1
Pubmed	18056258	Platelet fragmentation requires a specific structural conformation of human monoclonal antibody against beta3 integrin.		0.005	1	1	ITGB3
Pubmed	17520266	Substance P induces intestinal wound healing via fibroblasts--evidence for a TGF-beta-dependent effect.		0.005	1	1	TGFB1
Pubmed	17367465	C-kit protein expression in uterine and ovarian mesenchymal tumours.		0.005	1	1	KIT
Pubmed	10894936	Assignment of the human RhoHP1 gene (ARHD) to chromosome 11q14.3 by radiation hybrid mapping.		0.005	1	1	RHOD
Pubmed	16356644	Family-based and case-control association studies of glutamate receptor GRIK3 Ser310Ala polymorphism in Polish patients and families with alcohol dependence.		0.005	1	1	GRIK3
Pubmed	17959747	ATP-dependent transport of leukotrienes B4 and C4 by the multidrug resistance protein ABCC4 (MRP4).		0.005	1	1	ABCC4
Pubmed	16916603	Association between a TGFbeta1 promoter polymorphism and rhinosinusitis in aspirin-intolerant asthmatic patients.		0.005	1	1	TGFB1
Pubmed	16779673	Anti-apoptotic action by hypoxia inducible factor 1-alpha in human pituitary adenoma cell line, HP-75 in hypoxic condition.		0.005	1	1	HIF1A
Pubmed	19703231	Gene polymorphism in transforming growth factor-beta codon 10 is associated with susceptibility to Giardiasis.		0.005	1	1	TGFB1
Pubmed	16299313	Ectophosphorylation of CD36 regulates cytoadherence of Plasmodium falciparum to microvascular endothelium under flow conditions.		0.005	1	1	CD36
Pubmed	11777547	IL-1 genes in myasthenia gravis: IL-1A -889 polymorphism associated with sex and age of disease onset.		0.005	1	1	IL1A
Pubmed	14567988	TorsinA protein and neuropathology in early onset generalized dystonia with GAG deletion.		0.005	1	1	CXCR4
Pubmed	17269742	Overexpression of biglycan in the heart of transgenic mice: an antibody microarray study.		0.005	1	1	BGN
Pubmed	15254658	Serum levels of soluble E-selectin in colorectal cancer.		0.005	1	1	SELE
Pubmed	16307809	Transcriptional activity of genes encoding Transforming Growth Factor beta and its receptors in peripheral blood mononuclear cells from patients with acute coronary syndromes.		0.005	1	1	TGFB1
Pubmed	18394866	PDE4B polymorphisms and decreased PDE4B expression are associated with schizophrenia.		0.005	1	1	PDE4B
Pubmed	15217946	Expression and mutational status of c-kit in small-cell lung cancer: prognostic relevance.		0.005	1	1	KIT
Pubmed	17261426	Circulating levels of visfatin/pre-B-cell colony-enhancing factor 1 in relation to genotype, GFR, body composition, and survival in patients with CKD.		0.005	1	1	NAMPT
Pubmed	11882337	Humoral markers of inflammation and endothelial dysfunction in relation to adiposity and in vivo insulin action in Pima Indians.		0.005	1	1	SELE
Pubmed	18070108	Type I receptor binding of bone morphogenetic protein 6 is dependent on N-glycosylation of the ligand.		0.005	1	1	BMP6
Pubmed	15634264	Pleiotropic functions of plasminogen activator inhibitor-1.		0.005	1	1	SERPINE1
Pubmed	1301925	Genetic basis of galactosemia.		0.005	1	1	GALT
Pubmed	17854487	Interactions between the adducin 2 gene and antihypertensive drug therapies in determining blood pressure in people with hypertension.		0.005	1	1	ADD2
Pubmed	11919394	Cytogenetic and molecular genetic abnormalities in systemic mastocytosis.		0.005	1	1	KIT
Pubmed	2822087	Human thrombomodulin: complete cDNA sequence and chromosome localization of the gene.		0.005	1	1	THBD
Pubmed	12457401	Desmosterolosis presenting with multiple congenital anomalies and profound developmental delay.		0.005	1	1	DHCR24
Pubmed	18555590	Mobilized CD34+ cells as a biomarker candidate for the efficacy of combined maximal tolerance dose and continuous infusional chemotherapy and G-CSF surge in gastric cancer.		0.005	1	1	CD34
Pubmed	17185613	Potential of CD34 in the regulation of symmetrical and asymmetrical divisions by hematopoietic progenitor cells.		0.005	1	1	CD34
Pubmed	15880586	Subtype-specific expression and genetic alterations of the chemokinereceptor gene CXCR4 in medulloblastomas.		0.005	1	1	CXCR4
Pubmed	12224819	CD36 genotype and long-chain fatty acid uptake in the heart.		0.005	1	1	CD36
Pubmed	18247307	[Mutation detection of ATP2C1 gene in Chinese patients with Hailey-Hailey disease]		0.005	1	1	ATP2C1
Pubmed	19270338	Glycolipid acquisition by human glycolipid transfer protein dramatically alters intrinsic tryptophan fluorescence: insights into glycolipid binding affinity.		0.005	1	1	GLTP
Pubmed	17511040	Hypoxia inducible factor-1alpha mediates protective effects of ischemic preconditioning on ECV-304 endothelial cells.		0.005	1	1	HIF1A
Pubmed	2351647	Activation of human platelets by a stimulatory monoclonal antibody.		0.005	1	1	F11R
Pubmed	8528067	Synthesis, activity, and preliminary structure of the fourth EGF-like domain of thrombomodulin.		0.005	1	1	THBD
Pubmed	2903074	Assignment of the human aminopeptidase N (peptidase E) gene to chromosome 15q13-qter.		0.005	1	1	ANPEP
Pubmed	19364072	Isolating human islets of Langerhans causes loss of decay accelerating factor (CD55) on beta-cells.		0.005	1	1	CD55
Pubmed	17379280	Polyphenols downregulate PAI-1 gene expression in cultured human coronary artery endothelial cells: molecular contributor to cardiovascular protection.		0.005	1	1	SERPINE1
Pubmed	15827123	The activities of cyclin D1 that drive tumorigenesis.		0.005	1	1	FABP7
Pubmed	11696983	Isolation and characterization of the human gene homologous to the Drosophila headcase (hdc) gene in chromosome bands 6q23-q24, a region of common deletion in human pancreatic cancer.		0.005	1	1	HECA
Pubmed	2138632	Purification and characterization of an abundant cytosolic protein from human neutrophils that promotes Ca2(+)-dependent aggregation of isolated specific granules.		0.005	1	1	ANXA3
Pubmed	17319784	DAPK1 promoter hypermethylaiton in brain metastases and peripheral blood.		0.005	1	1	DAPK1
Pubmed	16644186	Hailey-Hailey disease with affective disorder: report of a case with novel ATP2C1 gene mutation.		0.005	1	1	ATP2C1
Pubmed	16136486	Increased immunohistochemical expression of thrombomodulin at placental perivascular myofibroblast in severe preeclampsia (PE).		0.005	1	1	THBD
Pubmed	4065897	Duplication of 2p25: confirmation of the assignment of soluble acid phosphatase (ACP1) locus to 2p25.		0.005	1	1	ACP1
Pubmed	15897903	Accumulation of hypoxia-inducible factor-1alpha is limited by transcription-dependent depletion.		0.005	1	1	HIF1A
Pubmed	18376309	Significant down-regulation of the plasminogen activator inhibitor 1 mRNA in pancreatic cancer.		0.005	1	1	SERPINE1
Pubmed	16114012	Arsenite pre-conditioning reduces UVB-induced apoptosis in corneal epithelial cells through the anti-apoptotic activity of 27 kDa heat shock protein (HSP27).		0.005	1	1	HSPB1
Pubmed	19010635	C-kit protein expression in Wilms' tumour: an immunohistochemical study.		0.005	1	1	KIT
Pubmed	8617355	Crystal structures of human procathepsin B at 3.2 and 3.3 Angstroms resolution reveal an interaction motif between a papain-like cysteine protease and its propeptide.		0.005	1	1	CTSB
Pubmed	12747448	Transforming growth factor-beta 1 expression in the peri-implant soft tissues of healthy and failing dental implants.		0.005	1	1	TGFB1
Pubmed	17335820	Increased plasma visfatin concentrations in women with polycystic ovary syndrome.		0.005	1	1	NAMPT
Pubmed	15611099	Phosphodiesterase 4D forms a cAMP diffusion barrier at the apical membrane of the airway epithelium.		0.005	1	1	PDE4D
Pubmed	19608867	Endothelial to mesenchymal transition via transforming growth factor-beta1/Smad activation is associated with portal venous stenosis in idiopathic portal hypertension.		0.005	1	1	TGFB1
Pubmed	16253768	Glucose requirement for hypoxic accumulation of hypoxia-inducible factor-1alpha (HIF-1alpha).		0.005	1	1	HIF1A
Pubmed	16467160	Streptococcal modulation of cellular invasion via TGF-beta1 signaling.		0.005	1	1	TGFB1
Pubmed	14634961	[Integrin Beta 3 PlA1/PlA2 polimorphism does not contribute to complications in both type 1 and type 2 diabetes]		0.005	1	1	ITGB3
Pubmed	17446422	Adipophilin expression is increased in symptomatic carotid atherosclerosis: correlation with red blood cells and cholesterol crystals.		0.005	1	1	PLIN2
Pubmed	15506833	Cognitive strengths and weaknesses in children and adolescents homozygous for the galactosemia Q188R mutation: a descriptive study.		0.005	1	1	GALT
Pubmed	16414972	Changes in plasma levels of fat-derived hormones adiponectin, leptin, resistin and visfatin in patients with rheumatoid arthritis.		0.005	1	1	NAMPT
Pubmed	19637235	Proteomics-based identification of two novel direct targets of hypoxia-inducible factor-1 and their potential roles in migration/invasion of cancer cells.		0.005	1	1	HIF1A
Pubmed	10782998	Binding of selenoprotein P to heparin: characterization with surface plasmon resonance.		0.005	1	1	SEPP1
Pubmed	15159456	Inhibition of basement membrane formation by a nidogen-binding laminin gamma1-chain fragment in human skin-organotypic cocultures.		0.005	1	1	LAMC1
Pubmed	12204814	Characterization of thrombomodulin gene mutations of the 5'-regulatory region.		0.005	1	1	THBD
Pubmed	17992643	Serum level of advanced glycation end-products (AGEs) is an independent determinant of plasminogen activator inhibitor-1 (PAI-1) in nondiabetic general population.		0.005	1	1	SERPINE1
Pubmed	15333048	The 4G-allele of the PAI-1 gene is not consistently associated with a higher prevalence of coronary stenosis.		0.005	1	1	SERPINE1
Pubmed	11374867	Downregulated expression of integrin alpha6 by transforming growth factor-beta(1) on lens epithelial cells in vitro.		0.005	1	1	TGFB1
Pubmed	11522017	Plasma PAI-1 levels in obese children--effect of weight loss and influence of PAI-1 promoter 4G/5G genotype.		0.005	1	1	SERPINE1
Pubmed	18992867	Is there an association between uterine leiomyomas and acid phosphatase locus 1 polymorphism?		0.005	1	1	ACP1
Pubmed	15542604	Mechanism of chaperone function in small heat shock proteins: dissociation of the HSP27 oligomer is required for recognition and binding of destabilized T4 lysozyme.		0.005	1	1	HSPB1
Pubmed	10955473	Maternal chromosome 7 hetero/isodisomy in Silver-Russell syndrome and PEG1 biallelic expression.		0.005	1	1	MEST
Pubmed	18539414	Upregulation of I-CAM1 in response to beryllium exposure in small airway epithelial cells.		0.005	1	1	ICAM1
[truncated: 10,325 more rows]
